# Supplementary material for: Mid-infrared complex refractive indices for oleic acid and optical properties of model oleic acid/water aerosols
Source: Royal Society of Chemistry journal article supplement (doi:10.1039/b905371a), 2009-01-01
Supplement: b905371a.csv [file b905371a.csv]

nu	k	sk	n	sn
4999.12383	0.00394	2.45826E-4	1.4524	1.99097E-4
4998.15949	0.00353	1.40539E-4	1.45315	1.19965E-4
4997.19515	0.00341	1.29682E-4	1.45288	1.26142E-4
4996.23082	0.0035	1.25126E-4	1.45298	1.33422E-4
4995.26648	0.0036	1.21671E-4	1.45305	1.63063E-4
4994.30214	0.00344	1.09224E-4	1.45326	1.34589E-4
4993.33781	0.00335	1.12169E-4	1.45311	1.42186E-4
4992.37347	0.00339	1.06031E-4	1.4531	1.73228E-4
4991.40913	0.00344	1.04479E-4	1.45303	2.36026E-4
4990.44479	0.00358	1.78932E-4	1.45302	2.8672E-4
4989.48046	0.00377	2.8985E-4	1.45321	1.56036E-4
4988.51612	0.00359	2.00156E-4	1.45348	6.69159E-5
4987.55178	0.00339	1.13522E-4	1.45338	1.02141E-4
4986.58745	0.00339	1.60367E-4	1.45319	2.00857E-4
4985.62311	0.0037	3.18458E-4	1.45315	1.43901E-4
4984.65877	0.00375	2.31604E-4	1.45346	1.43254E-4
4983.69443	0.00364	1.7199E-4	1.45355	1.00209E-4
4982.7301	0.00356	1.6571E-4	1.45359	1.35959E-4
4981.76576	0.00358	1.93777E-4	1.45361	1.19676E-4
4980.80142	0.00351	1.60807E-4	1.45374	1.02199E-4
4979.83708	0.00338	1.59931E-4	1.4538	8.76226E-5
4978.87275	0.00312	1.41308E-4	1.45375	1.01108E-4
4977.90841	0.00315	1.19818E-4	1.4534	1.30045E-4
4976.94407	0.00341	1.36653E-4	1.45341	1.30089E-4
4975.97974	0.00348	1.24848E-4	1.45356	1.04318E-4
4975.0154	0.00342	9.88258E-5	1.45369	9.62099E-5
4974.05106	0.00329	1.05981E-4	1.45373	7.90062E-5
4973.08672	0.00316	9.94129E-5	1.45362	1.00316E-4
4972.12239	0.0033	1.03367E-4	1.45351	1.25851E-4
4971.15805	0.00328	9.32963E-5	1.45366	1.21083E-4
4970.19371	0.00317	9.47315E-5	1.45353	1.09707E-4
4969.22938	0.0033	1.06867E-4	1.45345	1.24828E-4
4968.26504	0.00336	1.25614E-4	1.45353	1.26548E-4
4967.3007	0.0033	1.19067E-4	1.45355	1.06302E-4
4966.33636	0.00334	1.11032E-4	1.45346	1.0282E-4
4965.37203	0.00344	1.18546E-4	1.45346	1.15238E-4
4964.40769	0.00357	1.25269E-4	1.45354	1.13354E-4
4963.44335	0.00357	1.00962E-4	1.45376	1.65221E-4
4962.47902	0.00339	1.01292E-4	1.45385	2.18584E-4
4961.51468	0.00327	1.72957E-4	1.45372	2.45499E-4
4960.55034	0.00341	2.8E-4	1.45363	1.61518E-4
4959.586	0.00344	2.75078E-4	1.4538	8.21442E-5
4958.62167	0.00328	2.09477E-4	1.45385	1.11361E-4
4957.65733	0.0032	1.34713E-4	1.4537	1.17528E-4
4956.69299	0.00334	1.35186E-4	1.45361	9.06011E-5
4955.72866	0.00341	1.58819E-4	1.45368	1.21894E-4
4954.76432	0.00344	2.25905E-4	1.45374	8.92266E-5
4953.79998	0.00339	1.81388E-4	1.45382	9.68488E-5
4952.83564	0.00336	1.41405E-4	1.45374	8.55947E-5
4951.87131	0.00351	1.65011E-4	1.45376	7.45033E-5
4950.90697	0.00354	1.59199E-4	1.45399	1.04216E-4
4949.94263	0.00329	9.91759E-5	1.45411	1.16341E-4
4948.9783	0.00315	9.08386E-5	1.45397	8.42394E-5
4948.01396	0.00315	1.09335E-4	1.45384	9.59809E-5
4947.04962	0.00327	1.44405E-4	1.45376	9.51788E-5
4946.08528	0.00337	1.61223E-4	1.45387	8.86308E-5
4945.12095	0.00333	1.47185E-4	1.45399	8.2577E-5
4944.15661	0.00318	9.92765E-5	1.45404	9.26509E-5
4943.19227	0.00307	8.94718E-5	1.45393	1.03938E-4
4942.22794	0.00307	1.14345E-4	1.4538	9.42782E-5
4941.2636	0.0032	1.37848E-4	1.45371	6.98264E-5
4940.29926	0.00331	1.40636E-4	1.45377	6.66773E-5
4939.33492	0.00333	1.09721E-4	1.45386	9.03056E-5
4938.37059	0.00328	7.66043E-5	1.45392	1.10785E-4
4937.40625	0.00322	9.8766E-5	1.45389	1.12178E-4
4936.44191	0.00326	1.53508E-4	1.4538	1.16573E-4
4935.47758	0.00344	2.36866E-4	1.45386	7.52211E-5
4934.51324	0.0034	1.72082E-4	1.45407	1.4851E-4
4933.5489	0.00328	8.83033E-5	1.4541	1.28161E-4
4932.58456	0.0032	9.15126E-5	1.45412	9.57363E-5
4931.62023	0.00311	1.06282E-4	1.45408	1.00703E-4
4930.65589	0.00309	1.22076E-4	1.45397	8.80592E-5
4929.69155	0.0032	1.52723E-4	1.45392	8.09108E-5
4928.72722	0.00326	1.24136E-4	1.45407	1.35538E-4
4927.76288	0.00314	9.6006E-5	1.45418	1.17507E-4
4926.79854	0.00295	7.8147E-5	1.45413	9.28012E-5
4925.8342	0.00292	7.48437E-5	1.45394	1.13557E-4
4924.86987	0.00301	1.08583E-4	1.45389	9.79177E-5
4923.90553	0.00302	8.72822E-5	1.45388	8.60444E-5
4922.94119	0.00304	9.5223E-5	1.45384	8.03043E-5
4921.97686	0.00306	8.61599E-5	1.4538	1.07803E-4
4921.01252	0.00311	9.35279E-5	1.4537	1.58558E-4
4920.04818	0.00335	1.9261E-4	1.45369	1.14486E-4
4919.08384	0.00346	1.75901E-4	1.45393	8.63213E-5
4918.11951	0.00334	1.10166E-4	1.45406	1.07383E-4
4917.15517	0.00333	1.78389E-4	1.45404	1.23651E-4
4916.19083	0.00339	2.48007E-4	1.45421	9.96001E-5
4915.2265	0.00313	1.15908E-4	1.45436	1.53387E-4
4914.26216	0.00295	6.20697E-5	1.45418	8.29407E-5
4913.29782	0.00301	9.49586E-5	1.45405	7.13391E-5
4912.33348	0.00305	1.63501E-4	1.45408	7.4805E-5
4911.36915	0.00296	1.23041E-4	1.45405	1.20219E-4
4910.40481	0.00302	9.10616E-5	1.45394	1.00698E-4
4909.44047	0.00309	1.03966E-4	1.45398	1.1292E-4
4908.47614	0.00311	9.34117E-5	1.45397	1.34975E-4
4907.5118	0.00315	1.02888E-4	1.45403	1.10485E-4
4906.54746	0.00309	8.21384E-5	1.45408	8.03934E-5
4905.58312	0.00307	1.03073E-4	1.45401	8.86216E-5
4904.61879	0.00318	1.74271E-4	1.45406	9.23169E-5
4903.65445	0.00309	1.1431E-4	1.45419	1.66779E-4
4902.69011	0.00299	1.21099E-4	1.45415	1.26498E-4
4901.72578	0.00295	8.33235E-5	1.45408	1.23089E-4
4900.76144	0.003	6.90262E-5	1.45402	1.0509E-4
4899.7971	0.00301	9.08869E-5	1.45407	9.21375E-5
4898.83276	0.003	5.43993E-5	1.45403	1.01905E-4
4897.86843	0.00301	6.13201E-5	1.45408	8.25992E-5
4896.90409	0.00292	5.61037E-5	1.45405	9.13059E-5
4895.93975	0.00294	6.95148E-5	1.45397	1.06466E-4
4894.97542	0.00297	9.45996E-5	1.45396	1.01189E-4
4894.01108	0.00297	8.2179E-5	1.45389	1.1785E-4
4893.04674	0.00314	1.13746E-4	1.45384	1.50139E-4
4892.0824	0.00323	1.68776E-4	1.45407	1.04108E-4
4891.11807	0.00304	9.82719E-5	1.45415	9.73422E-5
4890.15373	0.00296	9.394E-5	1.45405	7.95341E-5
4889.18939	0.00296	1.20696E-4	1.45399	7.15095E-5
4888.22505	0.00297	9.94092E-5	1.45392	7.80543E-5
4887.26072	0.00308	1.18152E-4	1.45384	8.46809E-5
4886.29638	0.0032	1.30098E-4	1.45391	9.14359E-5
4885.33204	0.00322	1.00574E-4	1.45399	9.35957E-5
4884.36771	0.00323	1.14234E-4	1.45405	7.92921E-5
4883.40337	0.00324	1.26294E-4	1.45414	8.95684E-5
4882.43903	0.00316	1.05285E-4	1.45425	9.7932E-5
4881.47469	0.00299	9.638E-5	1.45423	8.19708E-5
4880.51036	0.00296	8.56212E-5	1.45408	1.01743E-4
4879.54602	0.00307	9.25235E-5	1.45405	1.01853E-4
4878.58168	0.00306	1.05052E-4	1.4541	9.46848E-5
4877.61735	0.00308	1.39254E-4	1.45406	7.37724E-5
4876.65301	0.00316	1.40448E-4	1.45412	5.93114E-5
4875.68867	0.00309	1.35138E-4	1.45425	7.82976E-5
4874.72433	0.00293	1.29103E-4	1.4542	1.14727E-4
4873.76	0.00295	9.43382E-5	1.45404	1.19855E-4
4872.79566	0.00307	8.06049E-5	1.45403	1.09677E-4
4871.83132	0.0031	9.66236E-5	1.45412	1.16038E-4
4870.86699	0.00303	8.90917E-5	1.45414	1.22517E-4
4869.90265	0.00301	9.12241E-5	1.45407	9.30497E-5
4868.93831	0.00312	8.15489E-5	1.45401	9.31084E-5
4867.97397	0.00325	1.12346E-4	1.45416	8.97458E-5
4867.00964	0.0031	8.30714E-5	1.45432	9.42062E-5
4866.0453	0.003	7.0333E-5	1.45419	9.18272E-5
4865.08096	0.0031	9.2294E-5	1.45419	1.10004E-4
4864.11663	0.00305	7.99145E-5	1.45431	1.02609E-4
4863.15229	0.00288	6.85522E-5	1.45426	1.00293E-4
4862.18795	0.00292	8.99387E-5	1.45409	1.29324E-4
4861.22361	0.00305	1.53587E-4	1.45409	1.13521E-4
4860.25928	0.0031	1.7152E-4	1.45417	9.1496E-5
4859.29494	0.00307	1.21543E-4	1.45426	1.33151E-4
4858.3306	0.00297	7.54758E-5	1.45429	1.28866E-4
4857.36627	0.00291	8.37863E-5	1.45421	8.23663E-5
4856.40193	0.00295	1.02974E-4	1.45415	7.34057E-5
4855.43759	0.00297	9.82073E-5	1.45414	9.87684E-5
4854.47325	0.00303	9.22119E-5	1.45412	9.3279E-5
4853.50892	0.00304	9.46811E-5	1.4542	8.44177E-5
4852.54458	0.00299	8.98367E-5	1.45419	7.95767E-5
4851.58024	0.003	8.20588E-5	1.45416	8.20458E-5
4850.61591	0.00304	9.98478E-5	1.45412	9.9583E-5
4849.65157	0.00313	1.20937E-4	1.45418	1.04317E-4
4848.68723	0.00308	7.69694E-5	1.45428	1.19914E-4
4847.72289	0.00303	1.15486E-4	1.45421	1.5401E-4
4846.75856	0.00315	2.10407E-4	1.45426	1.03985E-4
4845.79422	0.00305	1.08974E-4	1.45443	1.19314E-4
4844.82988	0.0029	7.59288E-5	1.45436	7.35171E-5
4843.86555	0.00291	1.25744E-4	1.45427	9.03188E-5
4842.90121	0.00295	1.81759E-4	1.45426	8.57953E-5
4841.93687	0.00289	1.35154E-4	1.45425	1.31204E-4
4840.97253	0.00294	9.52937E-5	1.45413	1.4236E-4
4840.0082	0.00309	1.00472E-4	1.45417	1.32959E-4
4839.04386	0.00311	1.16426E-4	1.4543	9.03471E-5
4838.07952	0.00298	1.32858E-4	1.45434	8.85219E-5
4837.11519	0.00301	1.71411E-4	1.45422	9.46835E-5
4836.15085	0.00314	1.6284E-4	1.45427	1.19793E-4
4835.18651	0.00319	1.82198E-4	1.4544	1.28311E-4
4834.22217	0.00311	1.66392E-4	1.45459	2.01295E-4
4833.25784	0.00289	8.15452E-5	1.45464	2.11319E-4
4832.2935	0.00273	6.67526E-5	1.4545	1.68064E-4
4831.32916	0.00277	5.58779E-5	1.45433	1.49035E-4
4830.36483	0.00286	6.53165E-5	1.45433	1.23821E-4
4829.40049	0.0029	6.32878E-5	1.45433	8.17713E-5
4828.43615	0.00291	1.09858E-4	1.45442	1.29685E-4
4827.47181	0.0028	5.83229E-5	1.45444	1.78953E-4
4826.50748	0.00277	6.52559E-5	1.45433	1.3478E-4
4825.54314	0.00287	5.58837E-5	1.4543	1.31021E-4
4824.5788	0.00291	8.36531E-5	1.45441	1.21049E-4
4823.61447	0.0028	8.99441E-5	1.45448	9.71931E-5
4822.65013	0.00269	6.584E-5	1.45439	9.00187E-5
4821.68579	0.00274	7.00458E-5	1.45425	8.28273E-5
4820.72145	0.00287	7.31675E-5	1.45427	7.97001E-5
4819.75712	0.00288	5.94975E-5	1.45439	7.7541E-5
4818.79278	0.00279	6.57781E-5	1.45444	8.17506E-5
4817.82844	0.00271	6.90984E-5	1.45441	8.74279E-5
4816.86411	0.00266	8.54246E-5	1.45432	9.11852E-5
4815.89977	0.00272	9.70643E-5	1.45422	1.00678E-4
4814.93543	0.0028	1.05755E-4	1.45424	9.1692E-5
4813.97109	0.00279	9.426E-5	1.45427	9.55468E-5
4813.00676	0.0028	7.47563E-5	1.45424	9.36434E-5
4812.04242	0.00286	8.46572E-5	1.45422	7.54895E-5
4811.07808	0.00294	1.38464E-4	1.45431	7.78991E-5
4810.11375	0.00287	1.16503E-4	1.45444	1.47225E-4
4809.14941	0.00274	5.81681E-5	1.45441	1.63374E-4
4808.18507	0.00274	6.75235E-5	1.45432	1.32526E-4
4807.22073	0.00278	6.62649E-5	1.45429	1.00535E-4
4806.2564	0.00281	6.31772E-5	1.45431	7.54324E-5
4805.29206	0.0028	8.5169E-5	1.45432	8.39562E-5
4804.32772	0.00283	1.17955E-4	1.45431	1.01636E-4
4803.36339	0.00283	8.184E-5	1.45435	1.26692E-4
4802.39905	0.00282	6.69319E-5	1.45437	1.00959E-4
4801.43471	0.00277	6.63424E-5	1.45442	8.41805E-5
4800.47037	0.00268	6.62137E-5	1.45436	9.11159E-5
4799.50604	0.00275	9.06606E-5	1.45424	9.7794E-5
4798.5417	0.00286	1.27888E-4	1.45431	9.1691E-5
4797.57736	0.00279	1.24646E-4	1.45439	1.04406E-4
4796.61302	0.00279	1.29779E-4	1.45433	1.1896E-4
4795.64869	0.00283	1.17169E-4	1.4544	1.59818E-4
4794.68435	0.00275	5.74084E-5	1.45444	1.66176E-4
4793.72001	0.00269	4.42874E-5	1.45441	1.32278E-4
4792.75568	0.00266	5.62079E-5	1.45433	1.09766E-4
4791.79134	0.00272	5.99485E-5	1.45424	1.1895E-4
4790.827	0.00285	6.85488E-5	1.45428	1.18516E-4
4789.86266	0.00283	6.82406E-5	1.45441	1.15844E-4
4788.89833	0.00275	6.34753E-5	1.45441	1.24904E-4
4787.93399	0.00274	6.29064E-5	1.45437	1.19829E-4
4786.96965	0.00276	7.56474E-5	1.45438	1.14016E-4
4786.00532	0.00273	6.54334E-5	1.4544	1.44282E-4
4785.04098	0.00271	4.73112E-5	1.45435	1.49108E-4
4784.07664	0.00277	5.64028E-5	1.45433	1.30062E-4
4783.1123	0.00279	6.44257E-5	1.45439	1.19868E-4
4782.14797	0.00273	6.16675E-5	1.45441	1.14986E-4
4781.18363	0.00271	6.96298E-5	1.45435	1.00058E-4
4780.21929	0.00275	6.82141E-5	1.45432	9.8174E-5
4779.25496	0.00283	6.05345E-5	1.45433	1.02812E-4
4778.29062	0.00284	6.28911E-5	1.45441	9.93924E-5
4777.32628	0.00282	6.57361E-5	1.45443	9.52702E-5
4776.36194	0.00282	7.07328E-5	1.45442	9.14782E-5
4775.39761	0.00287	7.43005E-5	1.45447	9.41753E-5
4774.43327	0.00283	7.2693E-5	1.45456	1.25906E-4
4773.46893	0.00278	5.41076E-5	1.45455	1.33813E-4
4772.5046	0.00278	5.92996E-5	1.45462	1.22889E-4
4771.54026	0.00265	5.47813E-5	1.45465	1.46203E-4
4770.57592	0.00259	4.64273E-5	1.45451	1.61568E-4
4769.61158	0.00271	8.12411E-5	1.45447	1.40626E-4
4768.64725	0.00272	6.54499E-5	1.45456	1.38547E-4
4767.68291	0.00269	5.99878E-5	1.45456	1.34415E-4
4766.71857	0.00272	6.4354E-5	1.45459	1.47123E-4
4765.75424	0.00268	7.8916E-5	1.45466	1.43045E-4
4764.7899	0.0026	5.23563E-5	1.45466	1.40095E-4
4763.82556	0.00258	6.1871E-5	1.45464	1.41288E-4
4762.86122	0.00253	7.25438E-5	1.45464	1.43286E-4
4761.89689	0.00253	6.6578E-5	1.45457	1.31636E-4
4760.93255	0.00258	7.29785E-5	1.4546	1.27813E-4
4759.96821	0.00256	7.78602E-5	1.45468	1.33465E-4
4759.00388	0.00245	7.34173E-5	1.45468	1.35321E-4
4758.03954	0.00245	7.96546E-5	1.45461	1.23175E-4
4757.0752	0.00244	7.56408E-5	1.45467	1.08522E-4
4756.11086	0.00232	6.81012E-5	1.45462	1.10182E-4
4755.14653	0.00236	7.02202E-5	1.4545	1.26126E-4
4754.18219	0.00244	8.2705E-5	1.45453	1.22437E-4
4753.21785	0.00241	8.41187E-5	1.45458	1.21904E-4
4752.25352	0.0024	8.73815E-5	1.45456	1.28029E-4
4751.28918	0.00241	9.40959E-5	1.45459	1.14478E-4
4750.32484	0.00237	9.19795E-5	1.45463	1.10395E-4
4749.3605	0.00232	9.37156E-5	1.45464	1.12908E-4
4748.39617	0.00228	9.44421E-5	1.45468	1.00691E-4
4747.43183	0.00213	8.70159E-5	1.45466	9.86271E-5
4746.46749	0.00209	8.81242E-5	1.45451	1.02044E-4
4745.50316	0.00211	8.96881E-5	1.45446	1.09778E-4
4744.53882	0.00212	8.7299E-5	1.4544	1.04313E-4
4743.57448	0.00213	8.30042E-5	1.45436	1.11623E-4
4742.61014	0.00218	9.16789E-5	1.45427	1.20206E-4
4741.64581	0.00232	1.11855E-4	1.45431	1.17054E-4
4740.68147	0.00232	1.23871E-4	1.45443	1.03207E-4
4739.71713	0.0022	1.12073E-4	1.45449	9.8863E-5
4738.7528	0.00209	1.05823E-4	1.4544	1.014E-4
4737.78846	0.00215	1.11553E-4	1.45424	8.87513E-5
4736.82412	0.00231	1.13146E-4	1.45428	8.17851E-5
4735.85978	0.00228	1.12409E-4	1.45442	7.48244E-5
4734.89545	0.00219	1.03331E-4	1.45442	7.02813E-5
4733.93111	0.00213	1.05094E-4	1.45439	7.8972E-5
4732.96677	0.00212	1.10799E-4	1.45433	8.31696E-5
4732.00244	0.00213	1.02353E-4	1.45432	8.72988E-5
4731.0381	0.0021	1.03043E-4	1.45428	8.15968E-5
4730.07376	0.00214	1.00325E-4	1.45423	7.10044E-5
4729.10942	0.00217	9.79585E-5	1.45426	7.69659E-5
4728.14509	0.00212	1.10503E-4	1.45425	7.32948E-5
4727.18075	0.00217	1.08303E-4	1.4542	6.09012E-5
4726.21641	0.00219	1.03618E-4	1.45426	6.30888E-5
4725.25208	0.00214	9.71043E-5	1.45427	6.15308E-5
4724.28774	0.00212	8.65183E-5	1.45427	6.05514E-5
4723.3234	0.00208	8.98818E-5	1.45426	6.00301E-5
4722.35906	0.00207	8.75166E-5	1.45422	5.76438E-5
4721.39473	0.00206	7.72177E-5	1.45423	6.26138E-5
4720.43039	0.00196	8.80742E-5	1.45419	6.26515E-5
4719.46605	0.00197	9.43208E-5	1.45406	6.61061E-5
4718.50172	0.00203	8.49244E-5	1.45401	7.58484E-5
4717.53738	0.00208	8.42431E-5	1.45396	7.86815E-5
4716.57304	0.00217	8.36073E-5	1.45397	6.81577E-5
4715.6087	0.0022	8.20439E-5	1.45403	6.21302E-5
4714.64437	0.00217	8.91942E-5	1.45406	5.83935E-5
4713.68003	0.00215	8.34287E-5	1.45407	5.89241E-5
4712.71569	0.00209	8.85083E-5	1.45407	7.05522E-5
4711.75135	0.00205	1.04228E-4	1.45395	7.58759E-5
4710.78702	0.00216	1.04772E-4	1.45388	6.73987E-5
4709.82268	0.00219	8.89004E-5	1.45393	7.95072E-5
4708.85834	0.00219	8.43345E-5	1.45386	8.98522E-5
4707.89401	0.00237	7.9938E-5	1.45386	7.59314E-5
4706.92967	0.00238	7.8903E-5	1.45406	5.85515E-5
4705.96533	0.00224	8.92573E-5	1.45409	5.30059E-5
4705.00099	0.00219	7.87602E-5	1.45403	5.66279E-5
4704.03666	0.00217	6.82412E-5	1.45401	5.79674E-5
4703.07232	0.00212	7.91258E-5	1.45393	7.13581E-5
4702.10798	0.0022	8.93615E-5	1.4538	7.97752E-5
4701.14365	0.00233	9.36778E-5	1.45384	7.95947E-5
4700.17931	0.00234	9.80623E-5	1.45387	7.36959E-5
4699.21497	0.00241	8.22934E-5	1.45385	7.75491E-5
4698.25063	0.00251	7.1023E-5	1.45397	6.82358E-5
4697.2863	0.00244	6.42863E-5	1.45407	6.21574E-5
4696.32196	0.00241	6.22625E-5	1.45411	6.10874E-5
4695.35762	0.00231	6.61064E-5	1.45415	5.35368E-5
4694.39329	0.00229	6.01168E-5	1.45404	6.46522E-5
4693.42895	0.00237	7.12544E-5	1.45409	8.30607E-5
4692.46461	0.00229	9.97162E-5	1.45418	7.90401E-5
4691.50027	0.0022	8.89654E-5	1.45412	7.88101E-5
4690.53594	0.00222	7.99264E-5	1.45409	6.94369E-5
4689.5716	0.00216	9.3923E-5	1.45413	6.7734E-5
4688.60726	0.00207	9.31572E-5	1.45401	7.97187E-5
4687.64293	0.00218	8.23845E-5	1.45392	8.09272E-5
4686.67859	0.00222	8.07385E-5	1.45402	6.48171E-5
4685.71425	0.00207	8.13989E-5	1.45401	6.14819E-5
4684.74991	0.00211	7.06246E-5	1.4538	7.65619E-5
4683.78558	0.00232	6.49044E-5	1.45383	7.51878E-5
4682.82124	0.00227	7.63392E-5	1.454	7.1709E-5
4681.8569	0.00214	8.33151E-5	1.45391	6.8541E-5
4680.89257	0.00228	7.10495E-5	1.45381	8.0412E-5
4679.92823	0.00232	7.79896E-5	1.45398	7.45209E-5
4678.96389	0.00216	9.88476E-5	1.45396	6.69834E-5
4677.99955	0.00222	9.70142E-5	1.4538	7.33592E-5
4677.03522	0.00235	7.36213E-5	1.45388	7.64956E-5
4676.07088	0.00224	7.08959E-5	1.45397	7.85337E-5
4675.10654	0.0022	8.61602E-5	1.45384	7.3586E-5
4674.14221	0.00233	8.72786E-5	1.45381	7.16367E-5
4673.17787	0.00236	9.10688E-5	1.45393	7.57999E-5
4672.21353	0.00226	1.10827E-4	1.45394	6.89094E-5
4671.24919	0.00229	1.02345E-4	1.45384	6.96383E-5
4670.28486	0.00241	7.10637E-5	1.45391	6.30101E-5
4669.32052	0.00233	7.04608E-5	1.45406	5.93224E-5
4668.35618	0.0022	9.92618E-5	1.454	6.23763E-5
4667.39185	0.00225	9.50056E-5	1.45393	7.40826E-5
4666.42751	0.00226	6.30936E-5	1.45402	7.38185E-5
4665.46317	0.00213	7.74918E-5	1.45402	6.191E-5
4664.49883	0.00209	8.37253E-5	1.45389	7.58822E-5
4663.5345	0.0022	6.85305E-5	1.45385	7.69251E-5
4662.57016	0.00218	6.18158E-5	1.45396	5.95489E-5
4661.60582	0.00201	8.08355E-5	1.45391	6.85832E-5
4660.64149	0.00203	8.73774E-5	1.45369	8.44335E-5
4659.67715	0.00224	6.62705E-5	1.45365	8.05174E-5
4658.71281	0.00229	6.58579E-5	1.45382	6.4737E-5
4657.74847	0.00213	8.17717E-5	1.45382	7.46159E-5
4656.78414	0.00216	6.8445E-5	1.45365	9.53129E-5
4655.8198	0.00234	5.27191E-5	1.45368	8.48661E-5
4654.85546	0.0023	6.71611E-5	1.45382	7.31435E-5
4653.89113	0.00219	8.56896E-5	1.45377	8.00568E-5
4652.92679	0.00223	7.90418E-5	1.45366	8.95652E-5
4651.96245	0.00238	6.01785E-5	1.45366	1.12456E-4
4650.99811	0.0024	1.02765E-4	1.45386	6.92598E-5
4650.03378	0.00218	7.37297E-5	1.45386	7.84648E-5
4649.06944	0.00223	6.61757E-5	1.45365	8.16503E-5
4648.1051	0.00241	5.5396E-5	1.45374	8.35943E-5
4647.14077	0.00229	6.71679E-5	1.4539	7.69277E-5
4646.17643	0.00214	8.73113E-5	1.45379	7.72953E-5
4645.21209	0.00221	7.7849E-5	1.45365	9.06689E-5
4644.24775	0.00231	5.22485E-5	1.4537	8.40823E-5
4643.28342	0.00225	5.05282E-5	1.45376	8.15822E-5
4642.31908	0.0022	7.55312E-5	1.45365	9.09807E-5
4641.35474	0.00233	6.43732E-5	1.45359	1.06341E-4
4640.39041	0.00245	4.63067E-5	1.45374	9.57236E-5
4639.42607	0.00228	5.41215E-5	1.45391	7.51113E-5
4638.46173	0.00203	6.54541E-5	1.45376	7.39592E-5
4637.49739	0.00211	6.01742E-5	1.45344	9.02767E-5
4636.53306	0.00243	5.45995E-5	1.45345	9.10389E-5
4635.56872	0.00243	5.71365E-5	1.4537	8.35158E-5
4634.60438	0.00226	6.56702E-5	1.45366	9.22871E-5
4633.64005	0.00231	5.90417E-5	1.45352	1.20001E-4
4632.67571	0.00246	7.70646E-5	1.45353	1.15215E-4
4631.71137	0.0025	8.92122E-5	1.45369	8.20941E-5
4630.74703	0.00236	6.83418E-5	1.45374	8.53197E-5
4629.7827	0.0023	5.72633E-5	1.45362	9.05082E-5
4628.81836	0.00243	5.18646E-5	1.45358	8.82622E-5
4627.85402	0.00244	6.21268E-5	1.45372	7.65875E-5
4626.88969	0.00229	6.84345E-5	1.45374	7.67917E-5
4625.92535	0.00222	5.44774E-5	1.45358	9.48799E-5
4624.96101	0.00232	4.34152E-5	1.45348	1.01324E-4
4623.99667	0.00239	4.58863E-5	1.45347	1.00454E-4
4623.03234	0.00249	5.86715E-5	1.45345	1.0248E-4
4622.068	0.00258	8.2812E-5	1.45353	8.50594E-5
4621.10366	0.00258	6.60501E-5	1.4536	9.37666E-5
4620.13932	0.00261	6.23978E-5	1.45368	8.54924E-5
4619.17499	0.00252	6.35007E-5	1.45381	7.79296E-5
4618.21065	0.00235	6.16505E-5	1.45379	9.8066E-5
4617.24631	0.00228	4.52391E-5	1.45363	1.23984E-4
4616.28198	0.00238	6.18331E-5	1.45347	1.29269E-4
4615.31764	0.00257	8.98805E-5	1.45353	9.80998E-5
4614.3533	0.00253	6.26601E-5	1.45369	8.67699E-5
4613.38896	0.00244	5.01379E-5	1.45366	9.85474E-5
4612.42463	0.00243	4.93353E-5	1.45363	9.7451E-5
4611.46029	0.00242	4.12004E-5	1.45359	9.99544E-5
4610.49595	0.00246	6.01398E-5	1.45355	9.41992E-5
4609.53162	0.00252	6.64751E-5	1.45355	7.83585E-5
4608.56728	0.00254	5.63234E-5	1.45358	7.87083E-5
4607.60294	0.00255	4.9448E-5	1.4536	8.25423E-5
4606.6386	0.00254	5.10265E-5	1.45363	8.15402E-5
4605.67427	0.00248	5.17972E-5	1.45362	8.79441E-5
4604.70993	0.00251	4.90061E-5	1.45353	9.60505E-5
4603.74559	0.00264	4.83811E-5	1.45355	9.78E-5
4602.78126	0.00266	5.59563E-5	1.45371	9.3589E-5
4601.81692	0.0025	6.00599E-5	1.45377	7.97088E-5
4600.85258	0.00238	5.4283E-5	1.45365	8.25796E-5
4599.88824	0.00244	4.9618E-5	1.45347	1.12093E-4
4598.92391	0.00262	6.89028E-5	1.45347	1.20476E-4
4597.95957	0.00265	9.38222E-5	1.45361	8.38442E-5
4596.99523	0.00257	6.72381E-5	1.45359	8.37814E-5
4596.0309	0.00267	6.73583E-5	1.45353	9.00333E-5
4595.06656	0.00271	6.79929E-5	1.45364	8.85359E-5
4594.10222	0.00268	7.13237E-5	1.45366	8.68279E-5
4593.13788	0.00271	6.48664E-5	1.4537	8.57448E-5
4592.17355	0.00264	5.35054E-5	1.45377	6.98699E-5
4591.20921	0.00256	4.28631E-5	1.45372	7.9376E-5
4590.24487	0.00261	5.29968E-5	1.45368	1.01342E-4
4589.28054	0.00262	7.66864E-5	1.45371	9.94366E-5
4588.3162	0.00263	1.05216E-4	1.45373	8.24567E-5
4587.35186	0.00259	9.03668E-5	1.4538	9.10396E-5
4586.38752	0.00248	5.52586E-5	1.45374	1.00683E-4
4585.42319	0.00252	6.59023E-5	1.45364	9.35736E-5
4584.45885	0.00259	7.11615E-5	1.45365	8.25242E-5
4583.49451	0.00259	7.25341E-5	1.45368	7.82035E-5
4582.53018	0.00261	8.51787E-5	1.45368	7.52537E-5
4581.56584	0.00259	7.5734E-5	1.4537	7.29222E-5
4580.6015	0.00261	5.43284E-5	1.45366	8.24198E-5
4579.63716	0.00266	5.28075E-5	1.4537	8.7246E-5
4578.67283	0.00263	5.09861E-5	1.45376	8.97401E-5
4577.70849	0.00258	5.69669E-5	1.45377	9.20089E-5
4576.74415	0.00256	7.09507E-5	1.45374	8.08778E-5
4575.77982	0.00256	6.38323E-5	1.45372	7.48522E-5
4574.81548	0.00258	5.61771E-5	1.45371	7.67829E-5
4573.85114	0.00258	4.24017E-5	1.45375	8.50753E-5
4572.8868	0.00254	5.68293E-5	1.45374	9.31254E-5
4571.92247	0.00256	8.91092E-5	1.45371	7.85957E-5
4570.95813	0.00256	6.39951E-5	1.45375	7.61479E-5
4569.99379	0.0025	5.00459E-5	1.45374	6.36243E-5
4569.02946	0.0025	4.91743E-5	1.45366	7.45892E-5
4568.06512	0.00257	6.78224E-5	1.45366	7.14117E-5
4567.10078	0.00254	6.33934E-5	1.4537	6.77886E-5
4566.13644	0.00251	4.2357E-5	1.45361	8.34998E-5
4565.17211	0.00264	5.35231E-5	1.45356	9.03971E-5
4564.20777	0.00272	6.61918E-5	1.45369	8.82044E-5
4563.24343	0.00265	7.38127E-5	1.45378	6.92265E-5
4562.2791	0.00258	5.09307E-5	1.45375	7.52368E-5
4561.31476	0.00261	5.03814E-5	1.45373	7.08881E-5
4560.35042	0.00259	5.08431E-5	1.45378	7.48004E-5
4559.38608	0.00253	6.24365E-5	1.45374	8.62532E-5
4558.42175	0.00257	6.3755E-5	1.45368	8.81842E-5
4557.45741	0.00265	5.96786E-5	1.45373	8.15016E-5
4556.49307	0.0026	4.98864E-5	1.45382	9.14347E-5
4555.52874	0.00253	6.71808E-5	1.45381	9.46413E-5
4554.5644	0.00249	8.71815E-5	1.45382	6.84665E-5
4553.60006	0.00239	6.40022E-5	1.45377	5.98831E-5
4552.63572	0.00239	6.07417E-5	1.45362	7.05806E-5
4551.67139	0.00249	7.29915E-5	1.45358	6.88001E-5
4550.70705	0.00253	5.89852E-5	1.45357	7.13234E-5
4549.74271	0.00264	5.73932E-5	1.45356	7.24108E-5
4548.77838	0.00267	5.86024E-5	1.45368	7.01774E-5
4547.81404	0.00261	6.10663E-5	1.45372	7.64577E-5
4546.8497	0.0026	6.52762E-5	1.45371	9.13909E-5
4545.88536	0.0026	9.57904E-5	1.45374	8.96289E-5
4544.92103	0.00253	1.10563E-4	1.45374	7.39429E-5
4543.95669	0.00256	8.30791E-5	1.45368	8.34595E-5
4542.99235	0.0026	8.35112E-5	1.45374	8.37635E-5
4542.02802	0.00253	8.14298E-5	1.45377	9.65586E-5
4541.06368	0.00248	6.13233E-5	1.45373	1.00501E-4
4540.09934	0.00246	5.44685E-5	1.45367	9.25533E-5
4539.135	0.0025	6.15607E-5	1.45359	9.561E-5
4538.17067	0.00262	6.89494E-5	1.4536	8.15955E-5
4537.20633	0.00264	5.87932E-5	1.45372	6.34805E-5
4536.24199	0.00254	5.84319E-5	1.45374	6.91484E-5
4535.27766	0.00252	5.63028E-5	1.45367	8.38654E-5
4534.31332	0.00257	5.77927E-5	1.45366	7.32952E-5
4533.34898	0.00258	5.28981E-5	1.45368	6.88496E-5
4532.38464	0.00258	5.31114E-5	1.45368	8.19828E-5
4531.42031	0.00259	5.31761E-5	1.45372	8.6069E-5
4530.45597	0.00255	5.92287E-5	1.45374	7.78479E-5
4529.49163	0.0025	6.04813E-5	1.45372	7.62654E-5
4528.52729	0.00251	6.10559E-5	1.45367	7.63732E-5
4527.56296	0.00253	5.68477E-5	1.45366	7.67637E-5
4526.59862	0.00257	6.25143E-5	1.45365	7.81371E-5
4525.63428	0.0026	6.68837E-5	1.45368	7.95144E-5
4524.66995	0.00261	7.67945E-5	1.45373	6.66857E-5
4523.70561	0.00255	6.26805E-5	1.4538	7.11805E-5
4522.74127	0.00243	5.18577E-5	1.45377	7.15154E-5
4521.77693	0.00242	5.74626E-5	1.45365	6.69992E-5
4520.8126	0.00252	5.49418E-5	1.45362	7.25932E-5
4519.84826	0.00256	5.17323E-5	1.45369	7.99056E-5
4518.88392	0.0025	5.86691E-5	1.45375	6.9822E-5
4517.91959	0.00243	6.39699E-5	1.4537	6.59734E-5
4516.95525	0.00246	6.49061E-5	1.45365	7.79661E-5
4515.99091	0.00243	5.84102E-5	1.45367	8.79461E-5
4515.02657	0.0024	5.16628E-5	1.45359	1.0007E-4
4514.06224	0.00248	5.95645E-5	1.45353	9.47477E-5
4513.0979	0.00255	6.39963E-5	1.45358	7.14188E-5
4512.13356	0.00249	5.03306E-5	1.45364	6.80877E-5
4511.16923	0.00245	4.98888E-5	1.45356	7.41857E-5
4510.20489	0.00252	6.45138E-5	1.45352	7.97933E-5
4509.24055	0.00258	6.63915E-5	1.45355	8.84379E-5
4508.27621	0.00258	6.58553E-5	1.4536	8.77394E-5
4507.31188	0.00254	6.2819E-5	1.45359	8.6649E-5
4506.34754	0.00261	6.17489E-5	1.45354	8.37675E-5
4505.3832	0.00272	6.3184E-5	1.45366	6.80357E-5
4504.41887	0.00258	4.73719E-5	1.45384	5.87073E-5
4503.45453	0.00238	4.46206E-5	1.45379	7.03125E-5
4502.49019	0.0023	4.92148E-5	1.45363	8.71135E-5
4501.52585	0.00235	4.38807E-5	1.45347	9.74913E-5
4500.56152	0.00249	5.38291E-5	1.45338	1.1751E-4
4499.59718	0.00267	9.53031E-5	1.45342	1.10758E-4
4498.63284	0.00272	1.07072E-4	1.4536	6.70314E-5
4497.66851	0.00261	6.48571E-5	1.45369	6.43557E-5
4496.70417	0.00255	5.12007E-5	1.45365	6.29963E-5
4495.73983	0.00257	5.67311E-5	1.45366	6.98186E-5
4494.77549	0.0025	5.16301E-5	1.45371	8.6405E-5
4493.81116	0.00242	6.78573E-5	1.45366	7.18786E-5
4492.84682	0.00239	6.76477E-5	1.45358	4.91953E-5
4491.88248	0.00242	5.1748E-5	1.45349	6.49538E-5
4490.91815	0.00247	4.93031E-5	1.45345	9.21439E-5
4489.95381	0.00255	5.89018E-5	1.4534	1.25766E-4
4488.98947	0.00267	1.01639E-4	1.45346	1.33057E-4
4488.02513	0.00268	1.44416E-4	1.45358	7.44267E-5
4487.0608	0.00262	9.29485E-5	1.45362	8.27863E-5
4486.09646	0.00259	7.57157E-5	1.45363	6.82646E-5
4485.13212	0.00254	7.43678E-5	1.45362	6.39247E-5
4484.16779	0.00257	7.36179E-5	1.45357	6.39646E-5
4483.20345	0.0026	6.59159E-5	1.45363	5.85111E-5
4482.23911	0.00254	5.98819E-5	1.45365	5.73496E-5
4481.27477	0.00255	7.0214E-5	1.45362	5.62889E-5
4480.31044	0.00256	6.55464E-5	1.4537	5.58744E-5
4479.3461	0.00241	4.36876E-5	1.45375	5.95263E-5
4478.38176	0.0023	4.12545E-5	1.4536	6.57727E-5
4477.41743	0.00237	3.9885E-5	1.45345	7.63742E-5
4476.45309	0.00249	4.50503E-5	1.45344	7.8488E-5
4475.48875	0.00253	5.59026E-5	1.4535	7.97071E-5
4474.52441	0.00253	5.8811E-5	1.45353	8.16308E-5
4473.56008	0.00251	5.98999E-5	1.45356	7.82249E-5
4472.59574	0.00247	7.38047E-5	1.45356	6.62683E-5
4471.6314	0.00244	7.1069E-5	1.45354	6.51562E-5
4470.66707	0.00242	5.70812E-5	1.45349	7.67185E-5
4469.70273	0.00245	4.73771E-5	1.45345	9.35895E-5
4468.73839	0.00247	3.55375E-5	1.45343	1.05189E-4
4467.77405	0.00251	5.50529E-5	1.45339	9.69436E-5
4466.80972	0.00259	6.99066E-5	1.45341	8.86003E-5
4465.84538	0.00261	7.14187E-5	1.4535	8.58372E-5
4464.88104	0.00256	7.44427E-5	1.45354	7.49953E-5
4463.91671	0.00251	6.66343E-5	1.45353	6.41408E-5
4462.95237	0.00251	5.51971E-5	1.4535	6.41138E-5
4461.98803	0.00251	5.42362E-5	1.45349	7.2544E-5
4461.02369	0.00253	6.14638E-5	1.45349	5.99042E-5
4460.05936	0.00253	5.31457E-5	1.45353	6.68566E-5
4459.09502	0.00248	6.19109E-5	1.45355	7.1989E-5
4458.13068	0.00243	5.76436E-5	1.45353	6.07154E-5
4457.16635	0.0024	4.6078E-5	1.45346	6.22445E-5
4456.20201	0.00242	5.95109E-5	1.45339	7.02953E-5
4455.23767	0.0025	6.01653E-5	1.45338	7.21058E-5
4454.27333	0.00251	4.29257E-5	1.45341	6.97578E-5
4453.309	0.00253	4.31538E-5	1.45339	7.84521E-5
4452.34466	0.00257	5.80869E-5	1.45345	8.60702E-5
4451.38032	0.0025	7.25063E-5	1.45349	8.19121E-5
4450.41599	0.00248	8.34272E-5	1.45343	7.38869E-5
4449.45165	0.00252	8.90473E-5	1.45345	7.22116E-5
4448.48731	0.00246	6.84984E-5	1.45349	7.83902E-5
4447.52297	0.0024	5.731E-5	1.45342	6.95638E-5
4446.55864	0.00243	5.14285E-5	1.45337	7.37822E-5
4445.5943	0.00245	6.69408E-5	1.45334	7.82252E-5
4444.62996	0.00247	8.36052E-5	1.45331	7.50053E-5
4443.66562	0.00255	8.36801E-5	1.4533	7.2916E-5
4442.70129	0.00257	7.06351E-5	1.4534	7.25251E-5
4441.73695	0.00249	6.31996E-5	1.45341	7.82813E-5
4440.77261	0.00248	6.73298E-5	1.45336	7.93832E-5
4439.80828	0.00249	5.51871E-5	1.45336	7.74222E-5
4438.84394	0.00247	4.60325E-5	1.45337	7.45099E-5
4437.8796	0.00243	5.16627E-5	1.45335	7.19591E-5
4436.91526	0.00242	5.31262E-5	1.45328	8.21843E-5
4435.95093	0.00249	5.07869E-5	1.45324	8.39596E-5
4434.98659	0.00249	4.66167E-5	1.45328	6.89635E-5
4434.02225	0.00249	3.89097E-5	1.45322	7.42107E-5
4433.05792	0.00254	4.87918E-5	1.45324	7.34595E-5
4432.09358	0.00251	5.24588E-5	1.45325	6.60623E-5
4431.12924	0.00253	5.14464E-5	1.45319	6.63419E-5
4430.1649	0.0026	4.94945E-5	1.45318	6.77529E-5
4429.20057	0.00264	7.0224E-5	1.45324	6.884E-5
4428.23623	0.00263	8.0199E-5	1.4533	7.35003E-5
4427.27189	0.00257	6.62417E-5	1.45334	8.65269E-5
4426.30756	0.00249	7.57506E-5	1.4533	9.43504E-5
4425.34322	0.00249	7.71692E-5	1.45322	9.11102E-5
4424.37888	0.00254	6.58887E-5	1.45319	7.79658E-5
4423.41454	0.00255	6.4374E-5	1.45318	8.16971E-5
4422.45021	0.0026	5.65832E-5	1.45315	9.35065E-5
4421.48587	0.00265	4.89395E-5	1.45323	8.78536E-5
4420.52153	0.00257	5.46035E-5	1.45328	8.19463E-5
4419.5572	0.0025	5.80663E-5	1.4532	8.45301E-5
4418.59286	0.00256	4.84873E-5	1.45311	8.88576E-5
4417.62852	0.00263	4.93024E-5	1.45311	9.19634E-5
4416.66418	0.00268	6.70137E-5	1.45316	9.57334E-5
4415.69985	0.00265	7.09913E-5	1.45323	8.70893E-5
4414.73551	0.00256	5.90432E-5	1.45322	6.54551E-5
4413.77117	0.00252	4.38195E-5	1.45314	6.38403E-5
4412.80684	0.00257	4.60142E-5	1.45303	7.42804E-5
4411.8425	0.00269	5.49464E-5	1.45303	7.52687E-5
4410.87816	0.00272	4.81428E-5	1.45312	8.0508E-5
4409.91382	0.00265	4.87664E-5	1.45313	8.96747E-5
4408.94949	0.00265	5.04045E-5	1.45306	1.04243E-4
4407.98515	0.00273	8.55355E-5	1.45301	1.01359E-4
4407.02081	0.00282	1.15288E-4	1.45306	8.03839E-5
4406.05648	0.0028	9.10021E-5	1.45316	7.94389E-5
4405.09214	0.00275	6.3719E-5	1.45315	7.97745E-5
4404.1278	0.00277	6.30531E-5	1.45316	7.97805E-5
4403.16346	0.00273	6.27725E-5	1.45321	7.39464E-5
4402.19913	0.00262	6.1346E-5	1.45315	7.43953E-5
4401.23479	0.00265	6.41237E-5	1.45299	1.00628E-4
4400.27045	0.00283	8.18996E-5	1.45296	1.11192E-4
4399.30612	0.00292	8.83498E-5	1.4531	8.34101E-5
4398.34178	0.00285	6.65538E-5	1.4532	6.54855E-5
4397.37744	0.00277	6.38335E-5	1.45319	6.35318E-5
4396.4131	0.00275	7.05003E-5	1.45317	6.79853E-5
4395.44877	0.00272	6.75684E-5	1.45315	6.54186E-5
4394.48443	0.0027	5.7487E-5	1.45308	7.18437E-5
4393.52009	0.00279	5.49156E-5	1.45302	8.75864E-5
4392.55576	0.00283	7.06369E-5	1.45307	8.49613E-5
4391.59142	0.00284	8.69274E-5	1.45309	8.48373E-5
4390.62708	0.00286	7.2567E-5	1.45312	9.51643E-5
4389.66274	0.00283	5.90732E-5	1.45316	9.17303E-5
4388.69841	0.00277	6.26427E-5	1.45317	8.18865E-5
4387.73407	0.00271	6.91234E-5	1.45311	7.67461E-5
4386.76973	0.00272	7.16026E-5	1.45302	8.6735E-5
4385.8054	0.00278	6.90725E-5	1.45296	1.02081E-4
4384.84106	0.00287	6.82882E-5	1.45295	1.01999E-4
4383.87672	0.00295	6.82435E-5	1.45303	8.24067E-5
4382.91238	0.00286	6.51316E-5	1.45311	7.08226E-5
4381.94805	0.00279	6.44561E-5	1.45302	7.52898E-5
4380.98371	0.00285	6.52801E-5	1.45292	8.59191E-5
4380.01937	0.00298	9.0779E-5	1.45292	8.56079E-5
4379.05504	0.00303	9.02936E-5	1.45303	8.19537E-5
4378.0907	0.00298	7.8626E-5	1.4531	6.19725E-5
4377.12636	0.00291	7.69488E-5	1.4531	6.81699E-5
4376.16202	0.00287	8.36047E-5	1.45303	7.54218E-5
4375.19769	0.00292	5.43269E-5	1.45296	7.82009E-5
4374.23335	0.00299	5.06483E-5	1.45298	6.86679E-5
4373.26901	0.00298	5.69973E-5	1.45299	7.82136E-5
4372.30468	0.00304	7.11881E-5	1.45297	7.82142E-5
4371.34034	0.00307	8.28674E-5	1.45303	6.16996E-5
4370.376	0.00303	7.68856E-5	1.45306	6.79251E-5
4369.41166	0.003	6.23316E-5	1.45302	9.39417E-5
4368.44733	0.00305	5.26491E-5	1.45297	1.04015E-4
4367.48299	0.00312	7.19659E-5	1.45299	8.51141E-5
4366.51865	0.00315	7.30638E-5	1.45304	8.14004E-5
4365.55432	0.00314	7.30202E-5	1.4531	8.23297E-5
4364.58998	0.00308	6.90734E-5	1.45313	7.0962E-5
4363.62564	0.00302	6.39622E-5	1.45308	7.91344E-5
4362.6613	0.00308	7.86255E-5	1.45301	9.95071E-5
4361.69697	0.00311	9.61558E-5	1.45307	8.20557E-5
4360.73263	0.00306	9.47783E-5	1.45306	6.90567E-5
4359.76829	0.00307	9.27903E-5	1.45301	7.91363E-5
4358.80396	0.00308	9.131E-5	1.45298	8.65616E-5
4357.83962	0.00313	7.27017E-5	1.4529	1.10526E-4
4356.87528	0.00329	7.07762E-5	1.45289	1.04091E-4
4355.91094	0.00335	7.77131E-5	1.45305	6.85855E-5
4354.94661	0.00326	6.88946E-5	1.45313	6.72477E-5
4353.98227	0.00318	6.50891E-5	1.45308	6.57841E-5
4353.01793	0.0032	7.78257E-5	1.45298	7.24958E-5
4352.05359	0.00331	9.74154E-5	1.45295	8.90063E-5
4351.08926	0.00341	5.80401E-5	1.45301	1.05187E-4
4350.12492	0.00344	6.36405E-5	1.45311	7.51214E-5
4349.16058	0.0034	6.51077E-5	1.45319	8.01007E-5
4348.19625	0.00334	6.68828E-5	1.45322	9.13543E-5
4347.23191	0.00327	7.2998E-5	1.45319	8.75711E-5
4346.26757	0.00324	7.53596E-5	1.4531	8.87734E-5
4345.30323	0.00332	8.77213E-5	1.45299	9.65482E-5
4344.3389	0.00347	9.76303E-5	1.453	8.94618E-5
4343.37456	0.00355	8.35309E-5	1.45308	7.76416E-5
4342.41022	0.00357	7.62511E-5	1.45315	7.46675E-5
4341.44589	0.00359	7.96017E-5	1.45321	7.5811E-5
4340.48155	0.00357	8.38246E-5	1.45327	7.50389E-5
4339.51721	0.00356	9.85306E-5	1.45325	8.22566E-5
4338.55287	0.00365	1.16654E-4	1.45327	8.47489E-5
4337.58854	0.0037	9.27544E-5	1.45339	9.2831E-5
4336.6242	0.00363	7.11755E-5	1.45349	7.70565E-5
4335.65986	0.00357	8.65211E-5	1.45348	8.24555E-5
4334.69553	0.00359	9.48803E-5	1.45348	1.10734E-4
4333.73119	0.00362	7.37501E-5	1.45352	1.14057E-4
4332.76685	0.00364	7.04707E-5	1.45361	9.45781E-5
4331.80251	0.00359	6.59699E-5	1.45369	9.25902E-5
4330.83818	0.00352	6.43919E-5	1.45372	8.80259E-5
4329.87384	0.0035	8.05785E-5	1.45372	7.83871E-5
4328.9095	0.00348	9.54033E-5	1.45374	8.50712E-5
4327.94517	0.00349	8.26846E-5	1.45375	1.01522E-4
4326.98083	0.0035	8.14643E-5	1.45384	8.67663E-5
4326.01649	0.00344	6.97946E-5	1.45396	8.8792E-5
4325.05215	0.00326	5.81056E-5	1.45401	9.51718E-5
4324.08782	0.00316	5.64687E-5	1.45392	9.03314E-5
4323.12348	0.00315	5.27927E-5	1.45389	7.96406E-5
4322.15914	0.00308	4.98053E-5	1.45387	7.36492E-5
4321.19481	0.00305	5.76207E-5	1.4538	8.53344E-5
4320.23047	0.00305	5.21411E-5	1.45375	8.89607E-5
4319.26613	0.00308	6.28833E-5	1.45372	8.2331E-5
4318.30179	0.00313	8.36199E-5	1.45376	7.06127E-5
4317.33746	0.00307	7.3889E-5	1.45384	6.40322E-5
4316.37312	0.00297	6.76626E-5	1.45381	5.75229E-5
4315.40878	0.00296	5.83364E-5	1.45374	6.96258E-5
4314.44445	0.00295	5.79419E-5	1.45374	7.18825E-5
4313.48011	0.0029	6.54706E-5	1.4537	7.40977E-5
4312.51577	0.00292	6.08785E-5	1.45363	9.06231E-5
4311.55143	0.00296	5.0481E-5	1.45364	9.98608E-5
4310.5871	0.00292	5.72329E-5	1.45364	8.75109E-5
4309.62276	0.00292	6.52013E-5	1.45358	8.04822E-5
4308.65842	0.00298	8.34838E-5	1.45355	7.89691E-5
4307.69409	0.00302	9.96006E-5	1.45359	7.44984E-5
4306.72975	0.003	7.93585E-5	1.45363	9.63125E-5
4305.76541	0.00298	5.55708E-5	1.45362	1.03001E-4
4304.80107	0.003	6.01294E-5	1.45362	8.75292E-5
4303.83674	0.00296	5.72031E-5	1.45367	7.4881E-5
4302.8724	0.0029	5.03095E-5	1.45362	7.1374E-5
4301.90806	0.00294	5.08844E-5	1.45358	7.36211E-5
4300.94373	0.00296	6.05383E-5	1.45362	7.07406E-5
4299.97939	0.00291	6.05093E-5	1.45361	7.53406E-5
4299.01505	0.00294	6.39054E-5	1.45357	8.06503E-5
4298.05071	0.00298	7.74863E-5	1.45365	7.2215E-5
4297.08638	0.00286	7.55201E-5	1.45371	6.71257E-5
4296.12204	0.00274	6.09283E-5	1.4536	7.18116E-5
4295.1577	0.00281	5.22747E-5	1.45348	7.77675E-5
4294.19337	0.00289	4.3763E-5	1.45351	8.51968E-5
4293.22903	0.00287	4.5676E-5	1.45355	7.5869E-5
4292.26469	0.00282	4.74471E-5	1.45357	7.12021E-5
4291.30035	0.00275	4.93096E-5	1.45351	8.54517E-5
4290.33602	0.00277	4.67044E-5	1.45342	9.86997E-5
4289.37168	0.00283	4.87916E-5	1.45339	9.30157E-5
4288.40734	0.00285	5.39758E-5	1.4534	8.19782E-5
4287.44301	0.00286	5.27079E-5	1.45338	7.107E-5
4286.47867	0.00288	5.4481E-5	1.45337	6.89868E-5
4285.51433	0.00291	5.17388E-5	1.45335	7.98044E-5
4284.54999	0.00296	5.03395E-5	1.45337	7.85111E-5
4283.58566	0.00299	6.53844E-5	1.45343	7.21071E-5
4282.62132	0.00294	7.22506E-5	1.4535	7.11819E-5
4281.65698	0.00283	6.60919E-5	1.4535	8.11938E-5
4280.69265	0.00276	6.26212E-5	1.45342	8.54159E-5
4279.72831	0.00276	6.49579E-5	1.45331	7.81407E-5
4278.76397	0.00283	5.61753E-5	1.45325	7.75852E-5
4277.79963	0.00288	4.77288E-5	1.45324	7.6741E-5
4276.8353	0.00288	5.31277E-5	1.45322	8.36655E-5
4275.87096	0.00293	5.50602E-5	1.45317	9.8559E-5
4274.90662	0.00299	5.8226E-5	1.45316	1.05344E-4
4273.94229	0.00305	7.94904E-5	1.45315	1.01536E-4
4272.97795	0.00314	9.87902E-5	1.45319	8.72391E-5
4272.01361	0.00314	7.44459E-5	1.4533	8.85909E-5
4271.04927	0.00305	5.83343E-5	1.45327	8.06204E-5
4270.08494	0.00313	6.69469E-5	1.45319	8.00735E-5
4269.1206	0.00323	7.72709E-5	1.45328	7.7748E-5
4268.15626	0.00316	6.31076E-5	1.45335	8.98085E-5
4267.19193	0.00315	7.05373E-5	1.4533	8.8134E-5
4266.22759	0.0032	6.01603E-5	1.45333	8.72478E-5
4265.26325	0.00315	5.34212E-5	1.45336	8.48904E-5
4264.29891	0.00316	6.36699E-5	1.45327	9.28354E-5
4263.33458	0.00328	8.4314E-5	1.45328	8.41804E-5
4262.37024	0.00331	8.119E-5	1.45335	7.59775E-5
4261.4059	0.00332	7.01915E-5	1.45338	8.48599E-5
4260.44156	0.00336	6.32467E-5	1.45343	8.27853E-5
4259.47723	0.00337	6.43771E-5	1.45347	7.73874E-5
4258.51289	0.00344	7.71642E-5	1.45353	8.52465E-5
4257.54855	0.00343	8.09833E-5	1.45373	7.6073E-5
4256.58422	0.00321	7.46777E-5	1.45381	7.49218E-5
4255.61988	0.00311	8.74004E-5	1.4537	7.89152E-5
4254.65554	0.00315	8.13625E-5	1.45365	9.17911E-5
4253.6912	0.00315	7.13745E-5	1.45369	9.02365E-5
4252.72687	0.00311	6.0607E-5	1.45371	8.06914E-5
4251.76253	0.00307	6.23605E-5	1.4537	8.64794E-5
4250.79819	0.00306	5.74375E-5	1.45366	1.13733E-4
4249.83386	0.0031	7.51859E-5	1.45367	1.05756E-4
4248.86952	0.00308	7.89111E-5	1.45375	7.05693E-5
4247.90518	0.00298	7.08593E-5	1.45377	6.99406E-5
4246.94084	0.00292	6.34859E-5	1.45372	8.74405E-5
4245.97651	0.00289	5.6343E-5	1.45366	9.00281E-5
4245.01217	0.00293	6.05039E-5	1.4536	8.31562E-5
4244.04783	0.00296	6.43065E-5	1.45363	8.64598E-5
4243.0835	0.00294	7.15016E-5	1.45364	7.7771E-5
4242.11916	0.00294	5.57649E-5	1.45363	8.76383E-5
4241.15482	0.00296	5.65059E-5	1.45369	8.58858E-5
4240.19048	0.00285	5.36451E-5	1.45377	6.89623E-5
4239.22615	0.00271	6.32146E-5	1.45367	6.41055E-5
4238.26181	0.00271	7.14009E-5	1.45354	7.90435E-5
4237.29747	0.00274	6.58928E-5	1.45348	8.88806E-5
4236.33314	0.00277	5.9061E-5	1.45343	9.82573E-5
4235.3688	0.00283	6.10068E-5	1.45339	1.09999E-4
4234.40446	0.00289	7.07184E-5	1.45337	1.06267E-4
4233.44012	0.00295	6.63035E-5	1.45339	9.87182E-5
4232.47579	0.00299	6.20904E-5	1.45345	9.36089E-5
4231.51145	0.00298	6.96951E-5	1.45351	8.31944E-5
4230.54711	0.00292	6.9755E-5	1.45354	8.12373E-5
4229.58278	0.00289	6.36799E-5	1.45351	8.76962E-5
4228.61844	0.00287	7.45927E-5	1.45352	7.56156E-5
4227.6541	0.00282	9.10772E-5	1.45348	7.07761E-5
4226.68976	0.00281	8.95583E-5	1.45341	9.67504E-5
4225.72543	0.00286	5.96013E-5	1.45334	1.24712E-4
4224.76109	0.00296	5.72298E-5	1.45332	1.135E-4
4223.79675	0.00303	5.64892E-5	1.45338	9.66383E-5
4222.83242	0.00304	6.19054E-5	1.45346	9.08619E-5
4221.86808	0.003	7.01461E-5	1.45352	8.02178E-5
4220.90374	0.00293	6.46262E-5	1.45353	8.13755E-5
4219.9394	0.00289	6.79635E-5	1.45348	7.89399E-5
4218.97507	0.00291	7.02175E-5	1.45344	7.54973E-5
4218.01073	0.00293	6.28741E-5	1.45343	7.67046E-5
4217.04639	0.00297	6.0323E-5	1.45345	7.2169E-5
4216.08206	0.00296	7.25684E-5	1.45348	7.04459E-5
4215.11772	0.00294	8.87778E-5	1.4535	6.41519E-5
4214.15338	0.0029	7.49764E-5	1.45351	7.42048E-5
4213.18904	0.00287	5.38532E-5	1.45345	8.5334E-5
4212.22471	0.00293	4.41036E-5	1.45343	7.94724E-5
4211.26037	0.00292	5.59173E-5	1.45349	7.15264E-5
4210.29603	0.00286	6.99949E-5	1.45345	8.53745E-5
4209.3317	0.00288	5.04057E-5	1.45343	9.98374E-5
4208.36736	0.00285	4.27729E-5	1.45341	9.87373E-5
4207.40302	0.00287	5.05557E-5	1.4533	1.11493E-4
4206.43868	0.00304	6.82695E-5	1.45328	1.0774E-4
4205.47435	0.00313	7.63225E-5	1.45344	7.98473E-5
4204.51001	0.00303	6.60358E-5	1.45358	7.88562E-5
4203.54567	0.00289	7.60834E-5	1.45356	8.31082E-5
4202.58134	0.00287	7.03829E-5	1.45346	9.1245E-5
4201.617	0.0029	6.11565E-5	1.45344	9.37052E-5
4200.65266	0.00291	6.40442E-5	1.45341	9.6618E-5
4199.68832	0.00295	7.541E-5	1.4534	8.9752E-5
4198.72399	0.00297	7.90177E-5	1.45342	8.22632E-5
4197.75965	0.00302	8.73866E-5	1.45344	8.92372E-5
4196.79531	0.00302	9.01864E-5	1.45351	9.20938E-5
4195.83098	0.00295	7.80006E-5	1.45353	9.17646E-5
4194.86664	0.00296	6.67055E-5	1.45352	8.06664E-5
4193.9023	0.00293	6.35226E-5	1.45356	6.71768E-5
4192.93796	0.00287	6.07536E-5	1.45354	7.31453E-5
4191.97363	0.00287	6.26557E-5	1.45349	8.30676E-5
4191.00929	0.00288	6.71745E-5	1.45351	8.62748E-5
4190.04495	0.00284	5.59726E-5	1.4535	8.94105E-5
4189.08062	0.00286	4.44231E-5	1.45347	8.68941E-5
4188.11628	0.00284	4.48799E-5	1.45349	8.27023E-5
4187.15194	0.00281	4.81509E-5	1.45341	8.9185E-5
4186.1876	0.00291	4.87996E-5	1.45336	9.20008E-5
4185.22327	0.00299	5.3587E-5	1.45345	8.39174E-5
4184.25893	0.00294	6.10026E-5	1.45357	6.79339E-5
4183.29459	0.0028	5.06381E-5	1.45358	6.5472E-5
4182.33026	0.00275	4.99994E-5	1.45349	7.42135E-5
4181.36592	0.00276	5.40423E-5	1.45344	7.76998E-5
4180.40158	0.00276	5.30218E-5	1.45338	8.40523E-5
4179.43724	0.00285	5.02258E-5	1.45335	8.6816E-5
4178.47291	0.00285	6.17022E-5	1.45341	7.68248E-5
4177.50857	0.00283	6.19772E-5	1.45336	8.79636E-5
4176.54423	0.00292	6.06581E-5	1.45336	8.6046E-5
4175.5799	0.00292	5.66733E-5	1.45345	7.02173E-5
4174.61556	0.00286	5.64202E-5	1.45346	7.43949E-5
4173.65122	0.00284	5.66551E-5	1.45344	8.74686E-5
4172.68688	0.00281	5.43783E-5	1.45343	9.51932E-5
4171.72255	0.00281	5.83699E-5	1.45338	1.01327E-4
4170.75821	0.00284	5.53709E-5	1.45337	1.10493E-4
4169.79387	0.00285	6.31191E-5	1.45338	9.13191E-5
4168.82953	0.00282	4.89319E-5	1.45334	8.3184E-5
4167.8652	0.00294	4.58271E-5	1.45327	8.97847E-5
4166.90086	0.00304	5.70198E-5	1.45345	7.43763E-5
4165.93652	0.00286	5.00893E-5	1.45358	8.08498E-5
4164.97219	0.00272	5.15675E-5	1.45343	9.68841E-5
4164.00785	0.00281	5.44613E-5	1.45331	9.637E-5
4163.04351	0.0029	6.16063E-5	1.45335	9.18344E-5
4162.07917	0.00291	7.44079E-5	1.45336	9.97643E-5
4161.11484	0.00296	6.96372E-5	1.4534	1.04816E-4
4160.1505	0.00293	5.61796E-5	1.4535	8.96882E-5
4159.18616	0.00283	5.36434E-5	1.45349	7.93841E-5
4158.22183	0.00284	5.18103E-5	1.45344	7.85426E-5
4157.25749	0.00284	5.53054E-5	1.45345	8.09301E-5
4156.29315	0.00284	5.59628E-5	1.45344	8.23499E-5
4155.32881	0.00285	5.48678E-5	1.45347	6.73699E-5
4154.36448	0.00278	4.87356E-5	1.45349	6.19016E-5
4153.40014	0.00273	6.04335E-5	1.45342	7.31709E-5
4152.4358	0.00279	5.04852E-5	1.45336	9.88944E-5
4151.47147	0.00284	5.26228E-5	1.4534	9.42099E-5
4150.50713	0.00282	5.39679E-5	1.45344	8.31396E-5
4149.54279	0.00278	5.77623E-5	1.45344	7.62912E-5
4148.57845	0.00274	5.67998E-5	1.45339	7.12271E-5
4147.61412	0.00278	5.33422E-5	1.45334	7.84062E-5
4146.64978	0.00283	5.00485E-5	1.45335	9.27974E-5
4145.68544	0.00284	4.8687E-5	1.45339	9.71491E-5
4144.72111	0.00283	4.98535E-5	1.4534	9.40932E-5
4143.75677	0.00284	5.40874E-5	1.4534	9.57996E-5
4142.79243	0.00286	6.72649E-5	1.45343	7.92365E-5
4141.82809	0.00283	6.31663E-5	1.45349	6.6025E-5
4140.86376	0.00277	5.06151E-5	1.45353	6.91976E-5
4139.89942	0.00265	4.40445E-5	1.45352	7.18291E-5
4138.93508	0.00259	5.4713E-5	1.45339	7.03481E-5
4137.97075	0.00266	5.501E-5	1.45329	7.82287E-5
4137.00641	0.00271	5.40565E-5	1.45328	8.87476E-5
4136.04207	0.00277	6.43815E-5	1.45325	1.04455E-4
4135.07773	0.00287	7.26563E-5	1.4533	1.04876E-4
4134.1134	0.00284	7.19803E-5	1.45344	8.23988E-5
4133.14906	0.00271	6.91135E-5	1.45343	7.11349E-5
4132.18472	0.00272	6.62939E-5	1.45333	8.53774E-5
4131.22039	0.00277	6.04677E-5	1.45334	1.00361E-4
4130.25605	0.00277	5.21855E-5	1.45337	1.0604E-4
4129.29171	0.00278	5.38343E-5	1.4534	9.11769E-5
4128.32737	0.00269	5.42005E-5	1.45344	8.29294E-5
4127.36304	0.00263	5.15984E-5	1.45334	8.5316E-5
4126.3987	0.00271	5.19058E-5	1.45329	7.83179E-5
4125.43436	0.00272	5.35006E-5	1.45336	7.50962E-5
4124.47003	0.00263	5.19354E-5	1.4533	8.49584E-5
4123.50569	0.00271	5.36631E-5	1.45319	9.32676E-5
4122.54135	0.00282	4.76585E-5	1.45325	1.0337E-4
4121.57701	0.00283	4.81237E-5	1.45331	1.10017E-4
4120.61268	0.00282	5.65466E-5	1.45338	1.03056E-4
4119.64834	0.00275	4.82367E-5	1.45342	9.42681E-5
4118.684	0.00269	5.93044E-5	1.4534	8.28659E-5
4117.71967	0.00264	5.01685E-5	1.45335	8.4209E-5
4116.75533	0.00268	4.6901E-5	1.45325	8.58969E-5
4115.79099	0.00278	4.5365E-5	1.4533	8.53573E-5
4114.82665	0.00273	3.89737E-5	1.45339	8.58955E-5
4113.86232	0.00266	4.07713E-5	1.45336	9.5333E-5
4112.89798	0.00265	4.27661E-5	1.45333	1.04009E-4
4111.93364	0.00265	3.87153E-5	1.45329	1.03779E-4
4110.96931	0.00267	5.0531E-5	1.45327	9.85369E-5
4110.00497	0.00269	5.97851E-5	1.45328	8.13446E-5
4109.04063	0.00268	6.19894E-5	1.45328	7.73104E-5
4108.07629	0.00266	6.31729E-5	1.45326	1.01216E-4
4107.11196	0.00268	4.9354E-5	1.45322	1.2215E-4
4106.14762	0.00276	5.89343E-5	1.45323	1.14341E-4
4105.18328	0.00275	6.10478E-5	1.45331	1.01871E-4
4104.21895	0.0027	5.20068E-5	1.4533	9.87083E-5
4103.25461	0.00272	5.27555E-5	1.45329	9.13221E-5
4102.29027	0.00272	5.13015E-5	1.45333	7.70836E-5
4101.32593	0.00266	4.11646E-5	1.45335	7.38475E-5
4100.3616	0.00264	4.73433E-5	1.45331	8.04857E-5
4099.39726	0.00265	4.59242E-5	1.4533	8.6141E-5
4098.43292	0.00263	4.51902E-5	1.4533	8.69713E-5
4097.46859	0.00261	5.02074E-5	1.45328	9.34655E-5
4096.50425	0.00262	5.50634E-5	1.45325	8.4543E-5
4095.53991	0.00263	5.39839E-5	1.45325	8.11023E-5
4094.57557	0.00262	5.53586E-5	1.45325	8.49092E-5
4093.61124	0.00263	5.09331E-5	1.45322	8.6746E-5
4092.6469	0.00268	5.00452E-5	1.45321	8.65811E-5
4091.68256	0.0027	5.4769E-5	1.45328	7.75986E-5
4090.71823	0.00265	5.646E-5	1.45333	6.97248E-5
4089.75389	0.00259	5.56357E-5	1.45331	7.28457E-5
4088.78955	0.00258	5.28323E-5	1.45327	8.2573E-5
4087.82521	0.00258	4.99319E-5	1.45326	8.52568E-5
4086.86088	0.00256	4.67966E-5	1.45326	8.32694E-5
4085.89654	0.00254	4.24086E-5	1.45325	8.84794E-5
4084.9322	0.00252	4.52403E-5	1.45322	9.0442E-5
4083.96786	0.00253	4.83772E-5	1.45318	9.80841E-5
4083.00353	0.00254	4.69006E-5	1.45318	9.63264E-5
4082.03919	0.0025	4.83204E-5	1.45317	8.30721E-5
4081.07485	0.00251	4.48891E-5	1.45307	9.57079E-5
4080.11052	0.00262	4.022E-5	1.45305	1.05701E-4
4079.14618	0.00266	4.10499E-5	1.45314	9.88468E-5
4078.18184	0.0026	3.9752E-5	1.45317	9.78692E-5
4077.2175	0.00261	4.6854E-5	1.45315	9.00483E-5
4076.25317	0.00259	5.20164E-5	1.4532	8.34375E-5
4075.28883	0.0025	5.49853E-5	1.45317	8.77377E-5
4074.32449	0.00249	4.93823E-5	1.45307	9.63373E-5
4073.36016	0.00257	4.08227E-5	1.45301	1.00801E-4
4072.39582	0.00265	4.20993E-5	1.45302	9.87817E-5
4071.43148	0.0027	4.91105E-5	1.4531	9.37993E-5
4070.46714	0.00265	5.09098E-5	1.45318	9.12437E-5
4069.50281	0.00256	4.75194E-5	1.45315	8.90404E-5
4068.53847	0.00255	4.26788E-5	1.45308	9.1882E-5
4067.57413	0.00261	3.74538E-5	1.45306	9.88298E-5
4066.6098	0.00262	4.3188E-5	1.45309	9.84379E-5
4065.64546	0.00262	4.55749E-5	1.45308	9.89056E-5
4064.68112	0.00265	5.38267E-5	1.45309	9.95123E-5
4063.71678	0.00265	6.24166E-5	1.45313	9.29664E-5
4062.75245	0.00262	5.04036E-5	1.45315	8.61324E-5
4061.78811	0.00258	4.18908E-5	1.45315	8.33207E-5
4060.82377	0.00255	4.46908E-5	1.45313	8.72244E-5
4059.85944	0.00254	5.30435E-5	1.4531	9.34279E-5
4058.8951	0.00255	6.40477E-5	1.45306	1.0251E-4
4057.93076	0.00259	7.55086E-5	1.45305	9.65636E-5
4056.96642	0.00259	7.31774E-5	1.45309	8.69785E-5
4056.00209	0.00257	5.65329E-5	1.45307	9.33282E-5
4055.03775	0.00259	5.4132E-5	1.45308	8.76556E-5
4054.07341	0.00256	4.49811E-5	1.4531	8.50904E-5
4053.10908	0.00251	4.4041E-5	1.45307	8.61857E-5
4052.14474	0.00252	4.92229E-5	1.453	8.35025E-5
4051.1804	0.00257	4.71323E-5	1.45297	8.54639E-5
4050.21606	0.00262	4.33593E-5	1.45297	8.50899E-5
4049.25173	0.00267	4.36142E-5	1.45301	8.82021E-5
4048.28739	0.00267	5.27413E-5	1.45307	9.54397E-5
4047.32305	0.00262	6.0752E-5	1.45311	9.46897E-5
4046.35872	0.00257	5.97032E-5	1.45309	9.55044E-5
4045.39438	0.00258	5.83625E-5	1.45304	1.034E-4
4044.43004	0.00261	6.94105E-5	1.45303	9.26367E-5
4043.4657	0.00265	6.89353E-5	1.45305	7.47206E-5
4042.50137	0.00267	5.51922E-5	1.45313	6.93286E-5
4041.53703	0.00257	4.30083E-5	1.45318	7.32004E-5
4040.57269	0.00253	4.31948E-5	1.45313	8.0031E-5
4039.60836	0.00253	5.40734E-5	1.45315	7.81124E-5
4038.64402	0.00246	6.35822E-5	1.45315	7.2697E-5
4037.67968	0.00241	5.77617E-5	1.45308	8.06604E-5
4036.71534	0.00244	4.44573E-5	1.453	9.08333E-5
4035.75101	0.00252	4.27421E-5	1.45302	8.02078E-5
4034.78667	0.00248	3.61123E-5	1.45308	7.76907E-5
4033.82233	0.00241	4.24428E-5	1.45305	8.08002E-5
4032.858	0.00241	4.66863E-5	1.45298	7.41687E-5
4031.89366	0.00241	5.11028E-5	1.45294	8.03785E-5
4030.92932	0.00247	5.27917E-5	1.45289	9.33027E-5
4029.96498	0.00253	4.99158E-5	1.45294	8.88749E-5
4029.00065	0.00247	4.24875E-5	1.45298	8.23614E-5
4028.03631	0.00243	4.48665E-5	1.45289	8.92931E-5
4027.07197	0.00255	4.90572E-5	1.45284	9.76197E-5
4026.10764	0.00261	5.37743E-5	1.45295	8.99744E-5
4025.1433	0.00251	4.38102E-5	1.45299	8.59259E-5
4024.17896	0.0025	4.66511E-5	1.45292	8.77369E-5
4023.21462	0.00256	5.35655E-5	1.45291	8.82018E-5
4022.25029	0.00257	5.21154E-5	1.45294	8.83545E-5
4021.28595	0.0026	4.76684E-5	1.45297	8.68177E-5
4020.32161	0.00257	4.34771E-5	1.45305	8.24078E-5
4019.35728	0.00249	4.25846E-5	1.45306	7.92443E-5
4018.39294	0.00244	4.60855E-5	1.45302	8.20984E-5
4017.4286	0.00242	5.41674E-5	1.45298	8.27148E-5
4016.46426	0.00242	5.22001E-5	1.45292	9.14767E-5
4015.49993	0.00247	5.08166E-5	1.4529	9.38788E-5
4014.53559	0.0025	5.03003E-5	1.45293	8.62064E-5
4013.57125	0.0025	4.63227E-5	1.45295	7.85736E-5
4012.60692	0.00249	4.86271E-5	1.45299	7.32664E-5
4011.64258	0.00243	5.21923E-5	1.45299	7.59073E-5
4010.67824	0.00241	4.93539E-5	1.45297	8.61359E-5
4009.7139	0.00239	4.46088E-5	1.45296	8.97633E-5
4008.74957	0.00234	3.98728E-5	1.45292	9.87453E-5
4007.78523	0.00236	3.79346E-5	1.45285	1.13142E-4
4006.82089	0.00242	5.10311E-5	1.45283	1.15289E-4
4005.85656	0.00245	6.22733E-5	1.45284	9.85523E-5
4004.89222	0.00246	5.17038E-5	1.45287	8.23849E-5
4003.92788	0.00245	4.32968E-5	1.4529	7.45383E-5
4002.96354	0.00241	4.46532E-5	1.4529	7.46065E-5
4001.99921	0.00241	4.85679E-5	1.45287	7.57983E-5
4001.03487	0.00243	4.60917E-5	1.45288	8.34347E-5
4000.07053	0.00239	4.29083E-5	1.45291	8.86788E-5
3999.1062	0.00236	4.85736E-5	1.45285	9.06665E-5
3998.14186	0.00242	4.27247E-5	1.45283	9.76603E-5
3997.17752	0.00241	3.72412E-5	1.45289	9.97803E-5
3996.21318	0.00237	4.13921E-5	1.45288	9.40323E-5
3995.24885	0.00236	4.98595E-5	1.45287	8.80131E-5
3994.28451	0.00235	5.08039E-5	1.45287	8.61585E-5
3993.32017	0.0023	4.46345E-5	1.45287	8.68276E-5
3992.35583	0.00225	4.9624E-5	1.45281	8.65475E-5
3991.3915	0.00228	3.93645E-5	1.45272	1.00976E-4
3990.42716	0.00235	3.9067E-5	1.45271	1.01216E-4
3989.46282	0.00237	4.12958E-5	1.45272	9.44529E-5
3988.49849	0.0024	4.86538E-5	1.45272	9.0096E-5
3987.53415	0.00242	5.46074E-5	1.45278	8.01674E-5
3986.56981	0.00236	5.0311E-5	1.45282	7.67304E-5
3985.60547	0.00232	4.31641E-5	1.45278	8.26535E-5
3984.64114	0.00233	3.74168E-5	1.45274	8.19327E-5
3983.6768	0.00233	3.802E-5	1.45273	8.34871E-5
3982.71246	0.00238	4.66206E-5	1.45272	8.86053E-5
3981.74813	0.00237	5.34014E-5	1.45281	8.31443E-5
3980.78379	0.00226	5.62889E-5	1.4528	8.31292E-5
3979.81945	0.00223	5.3588E-5	1.45271	9.37641E-5
3978.85511	0.00227	4.92243E-5	1.45268	9.71255E-5
3977.89078	0.00226	4.65247E-5	1.45266	9.85153E-5
3976.92644	0.00228	4.63737E-5	1.45261	9.53297E-5
3975.9621	0.00231	5.11873E-5	1.45262	8.71109E-5
3974.99777	0.00231	4.59379E-5	1.4526	9.31985E-5
3974.03343	0.00236	4.26899E-5	1.45258	1.03053E-4
3973.06909	0.00238	4.52792E-5	1.45263	9.4397E-5
3972.10475	0.00235	4.09507E-5	1.45264	8.88157E-5
3971.14042	0.00234	4.13992E-5	1.45262	8.82924E-5
3970.17608	0.00234	4.18344E-5	1.45262	8.41298E-5
3969.21174	0.00235	3.97992E-5	1.45261	8.71955E-5
3968.24741	0.00234	4.54824E-5	1.45264	9.9871E-5
3967.28307	0.0023	5.46181E-5	1.45261	1.14742E-4
3966.31873	0.00232	5.34246E-5	1.45254	1.23833E-4
3965.35439	0.00241	5.53715E-5	1.45253	1.07237E-4
3964.39006	0.00246	4.60002E-5	1.45263	9.25309E-5
3963.42572	0.00237	4.96952E-5	1.45273	9.22088E-5
3962.46138	0.00225	5.5209E-5	1.45268	1.0486E-4
3961.49705	0.00226	5.43053E-5	1.45258	1.10067E-4
3960.53271	0.0023	5.75482E-5	1.45259	9.12375E-5
3959.56837	0.00227	4.65027E-5	1.45257	8.60952E-5
3958.60403	0.00229	3.70038E-5	1.45252	1.02835E-4
3957.6397	0.00233	4.49733E-5	1.45254	1.01081E-4
3956.67536	0.00231	5.13602E-5	1.45258	8.69833E-5
3955.71102	0.00226	4.97234E-5	1.45255	8.0451E-5
3954.74669	0.00228	5.03442E-5	1.45249	8.72313E-5
3953.78235	0.00234	5.61813E-5	1.45247	1.02035E-4
3952.81801	0.00236	5.28126E-5	1.45251	1.10481E-4
3951.85367	0.00236	5.16873E-5	1.45255	1.03765E-4
3950.88934	0.00231	5.17895E-5	1.4526	8.86566E-5
3949.925	0.00222	4.40522E-5	1.45254	8.94017E-5
3948.96066	0.00227	3.58229E-5	1.45244	1.00182E-4
3947.99633	0.00234	4.14875E-5	1.45248	9.36125E-5
3947.03199	0.0023	5.70685E-5	1.4525	9.96931E-5
3946.06765	0.00233	6.35119E-5	1.45249	1.09622E-4
3945.10331	0.00231	5.06445E-5	1.45254	1.06465E-4
3944.13898	0.00225	4.96803E-5	1.45252	1.00812E-4
3943.17464	0.00222	5.54682E-5	1.45249	1.05763E-4
3942.2103	0.00222	4.4064E-5	1.45239	1.26251E-4
3941.24597	0.00233	6.00308E-5	1.45236	1.17807E-4
3940.28163	0.00237	6.08517E-5	1.45247	8.61278E-5
3939.31729	0.0023	4.30287E-5	1.45251	8.50086E-5
3938.35295	0.00225	4.37241E-5	1.45247	9.20858E-5
3937.38862	0.00225	4.27417E-5	1.45242	9.96803E-5
3936.42428	0.00231	4.58923E-5	1.45242	1.06514E-4
3935.45994	0.0023	5.18377E-5	1.45251	9.69025E-5
3934.49561	0.00219	4.68479E-5	1.4525	8.32075E-5
3933.53127	0.00215	4.06957E-5	1.4524	8.8869E-5
3932.56693	0.0022	4.5387E-5	1.45234	9.501E-5
3931.60259	0.00225	4.85211E-5	1.45234	9.89366E-5
3930.63826	0.00227	4.66878E-5	1.45235	9.28091E-5
3929.67392	0.00226	4.18138E-5	1.45238	8.90988E-5
3928.70958	0.00223	3.98444E-5	1.45237	9.14452E-5
3927.74525	0.00222	4.1861E-5	1.45233	8.94736E-5
3926.78091	0.00226	4.36587E-5	1.45231	8.91853E-5
3925.81657	0.00228	5.06974E-5	1.45235	8.91438E-5
3924.85223	0.00223	5.24376E-5	1.45239	9.08356E-5
3923.8879	0.00215	5.55828E-5	1.45234	9.73869E-5
3922.92356	0.00218	5.67959E-5	1.45223	1.08006E-4
3921.95922	0.00228	4.27256E-5	1.45222	1.12449E-4
3920.99489	0.0023	4.20541E-5	1.45228	1.05485E-4
3920.03055	0.00226	5.51417E-5	1.45231	1.07641E-4
3919.06621	0.00223	6.30284E-5	1.45227	1.05384E-4
3918.10187	0.00228	6.17703E-5	1.45224	9.96737E-5
3917.13754	0.0023	6.25863E-5	1.45232	8.59112E-5
3916.1732	0.00219	5.02387E-5	1.45233	8.55141E-5
3915.20886	0.00217	4.47254E-5	1.45223	9.07021E-5
3914.24453	0.00223	4.24458E-5	1.4522	9.63897E-5
3913.28019	0.00224	4.40134E-5	1.4522	1.07935E-4
3912.31585	0.00225	5.16764E-5	1.45219	1.18965E-4
3911.35151	0.00229	5.78073E-5	1.45219	1.12173E-4
3910.38718	0.00228	5.29096E-5	1.45223	1.02093E-4
3909.42284	0.00228	4.62792E-5	1.45221	9.46259E-5
3908.4585	0.00229	4.86934E-5	1.45222	9.79134E-5
3907.49417	0.0023	5.25123E-5	1.45224	1.03335E-4
3906.52983	0.00227	5.10964E-5	1.45228	9.73247E-5
3905.56549	0.00226	5.34525E-5	1.45225	9.88492E-5
3904.60115	0.00226	6.96828E-5	1.45233	8.96342E-5
3903.63682	0.00209	5.43243E-5	1.45229	9.59867E-5
3902.67248	0.00213	6.26684E-5	1.45214	1.03478E-4
3901.70814	0.00218	7.27494E-5	1.45217	1.06788E-4
3900.7438	0.00216	5.99051E-5	1.45213	1.15825E-4
3899.77947	0.00222	6.98495E-5	1.45213	1.02581E-4
3898.81513	0.00216	6.21734E-5	1.45217	1.08999E-4
3897.85079	0.00215	4.57958E-5	1.45208	1.13759E-4
3896.88646	0.00219	4.22103E-5	1.45206	1.09766E-4
3895.92212	0.00222	4.74052E-5	1.45205	1.05924E-4
3894.95778	0.00226	5.56239E-5	1.45206	9.95253E-5
3893.99344	0.00224	4.57924E-5	1.45206	1.01036E-4
3893.02911	0.00232	5.46027E-5	1.452	1.12368E-4
3892.06477	0.00243	8.04524E-5	1.45216	8.94377E-5
3891.10043	0.00224	7.59934E-5	1.45229	7.72157E-5
3890.1361	0.00213	5.13248E-5	1.45213	9.81912E-5
3889.17176	0.00223	4.95233E-5	1.4521	9.728E-5
3888.20742	0.00221	4.91007E-5	1.45216	9.61665E-5
3887.24308	0.00219	5.26024E-5	1.45211	1.09379E-4
3886.27875	0.00221	8.27837E-5	1.45223	8.37389E-5
3885.31441	0.00195	5.10382E-5	1.45219	7.63537E-5
3884.35007	0.002	4.03877E-5	1.45188	8.40982E-5
3883.38574	0.0022	4.50964E-5	1.45189	8.56672E-5
3882.4214	0.00225	5.05431E-5	1.45195	9.00837E-5
3881.45706	0.00227	6.61701E-5	1.45201	9.1637E-5
3880.49272	0.00224	9.15911E-5	1.4521	9.02034E-5
3879.52839	0.00211	6.53019E-5	1.45208	1.08743E-4
3878.56405	0.00214	4.18836E-5	1.45197	1.02378E-4
3877.59971	0.00217	3.78435E-5	1.452	9.19918E-5
3876.63538	0.00217	3.75682E-5	1.452	9.43922E-5
3875.67104	0.00214	3.6007E-5	1.45203	9.59211E-5
3874.7067	0.00212	6.70654E-5	1.45201	9.41403E-5
3873.74236	0.00206	6.89754E-5	1.45197	1.0672E-4
3872.77803	0.00212	4.66944E-5	1.45188	1.08001E-4
3871.81369	0.00214	5.25069E-5	1.45195	9.86977E-5
3870.84935	0.00211	1.10712E-4	1.45189	1.06224E-4
3869.88502	0.00215	1.50718E-4	1.45196	9.74729E-5
3868.92068	0.00202	7.17345E-5	1.45192	1.31548E-4
3867.95634	0.00207	3.69208E-5	1.45181	1.17348E-4
3866.992	0.00211	3.51952E-5	1.45178	1.17095E-4
3866.02767	0.00219	5.24776E-5	1.45176	1.21959E-4
3865.06333	0.00224	7.87244E-5	1.45188	1.03895E-4
3864.09899	0.0021	5.46705E-5	1.4519	1.02608E-4
3863.13466	0.00211	4.47137E-5	1.45178	1.06866E-4
3862.17032	0.00214	6.07248E-5	1.45182	1.16501E-4
3861.20598	0.00212	5.80348E-5	1.45175	1.36447E-4
3860.24164	0.00218	5.27096E-5	1.45174	1.31989E-4
3859.27731	0.00222	5.57043E-5	1.45175	1.11518E-4
3858.31297	0.00219	5.16113E-5	1.4518	1.04298E-4
3857.34863	0.0022	4.81272E-5	1.45174	1.11766E-4
3856.3843	0.00216	4.94588E-5	1.45175	1.27601E-4
3855.41996	0.00234	1.09524E-4	1.45151	1.63033E-4
3854.45562	0.00267	2.38568E-4	1.452	9.14957E-5
3853.49128	0.00206	1.9738E-4	1.45223	1.28413E-4
3852.52695	0.00199	1.2373E-4	1.45184	1.69453E-4
3851.56261	0.00207	6.81924E-5	1.45184	1.74849E-4
3850.59827	0.00208	4.80183E-5	1.45179	1.395E-4
3849.63394	0.00206	4.78108E-5	1.45179	1.2537E-4
3848.6696	0.00207	3.91497E-5	1.45171	1.25475E-4
3847.70526	0.00212	3.70987E-5	1.45172	1.24697E-4
3846.74092	0.00212	4.01194E-5	1.45173	1.11786E-4
3845.77659	0.00211	4.16723E-5	1.45172	1.0946E-4
3844.81225	0.00215	4.75824E-5	1.45174	9.47772E-5
3843.84791	0.00206	4.2124E-5	1.45178	8.63707E-5
3842.88358	0.00204	4.9113E-5	1.45166	1.02944E-4
3841.91924	0.00213	5.95883E-5	1.45166	1.04321E-4
3840.9549	0.00214	7.14799E-5	1.45175	8.32448E-5
3839.99056	0.002	7.09684E-5	1.45176	9.33271E-5
3839.02623	0.00203	9.24729E-5	1.4516	1.03201E-4
3838.06189	0.00209	1.37162E-4	1.45174	1.12698E-4
3837.09755	0.00185	6.53455E-5	1.45166	1.66323E-4
3836.13322	0.00197	4.31778E-5	1.45143	1.38504E-4
3835.16888	0.00209	4.72996E-5	1.4515	1.14551E-4
3834.20454	0.00207	4.50148E-5	1.4515	1.21654E-4
3833.2402	0.00211	3.81279E-5	1.45148	1.25472E-4
3832.27587	0.00212	4.91877E-5	1.45153	1.10636E-4
3831.31153	0.00204	4.99352E-5	1.45152	1.24873E-4
3830.34719	0.00208	4.91802E-5	1.45141	1.24902E-4
3829.38286	0.00216	4.82274E-5	1.45142	1.16424E-4
3828.41852	0.00221	5.11363E-5	1.45144	1.14521E-4
3827.45418	0.00222	5.8207E-5	1.45153	1.08796E-4
3826.48984	0.00214	6.13108E-5	1.45155	1.14169E-4
3825.52551	0.00212	4.59093E-5	1.4515	1.27331E-4
3824.56117	0.00214	4.8786E-5	1.45149	1.0633E-4
3823.59683	0.0021	4.58431E-5	1.45149	1.02424E-4
3822.6325	0.00217	7.46173E-5	1.45136	1.12098E-4
3821.66816	0.00234	1.40697E-4	1.45158	1.02378E-4
3820.70382	0.00201	7.95257E-5	1.45174	1.48351E-4
3819.73948	0.00188	3.92E-5	1.45144	1.42916E-4
3818.77515	0.00204	4.34893E-5	1.4513	1.3789E-4
3817.81081	0.0022	6.44318E-5	1.45135	1.15347E-4
3816.84647	0.00217	8.7282E-5	1.45152	8.77456E-5
3815.88214	0.00199	9.78701E-5	1.45149	1.27103E-4
3814.9178	0.002	5.49991E-5	1.45131	1.52798E-4
3813.95346	0.00213	6.51798E-5	1.45129	1.14966E-4
3812.98912	0.00215	5.67342E-5	1.45136	1.07309E-4
3812.02479	0.00214	5.0845E-5	1.45138	1.03472E-4
3811.06045	0.0021	4.77189E-5	1.4514	1.07464E-4
3810.09611	0.00207	4.1464E-5	1.45137	1.07738E-4
3809.13177	0.00204	4.4655E-5	1.45135	1.16954E-4
3808.16744	0.00206	5.42526E-5	1.45128	1.18374E-4
3807.2031	0.00206	7.95313E-5	1.45129	1.22486E-4
3806.23876	0.00202	6.53954E-5	1.45119	1.57874E-4
3805.27443	0.00218	7.38195E-5	1.4511	1.46152E-4
3804.31009	0.00227	6.92052E-5	1.45121	1.16813E-4
3803.34575	0.00226	7.28177E-5	1.45125	1.20167E-4
3802.38141	0.00233	1.15607E-4	1.45134	9.88655E-5
3801.41708	0.00219	1.19663E-4	1.45151	9.7766E-5
3800.45274	0.00198	6.67031E-5	1.45138	1.28403E-4
3799.4884	0.00205	5.04159E-5	1.45123	1.22919E-4
3798.52407	0.00209	4.56829E-5	1.45121	1.29753E-4
3797.55973	0.00218	6.05017E-5	1.4512	1.11883E-4
3796.59539	0.00215	5.65376E-5	1.4513	1.04321E-4
3795.63105	0.00208	4.77253E-5	1.45124	1.14914E-4
3794.66672	0.00212	4.98063E-5	1.4512	1.17718E-4
3793.70238	0.00214	3.83443E-5	1.45121	1.18238E-4
3792.73804	0.00215	3.91305E-5	1.45121	1.17834E-4
3791.77371	0.00216	4.31684E-5	1.45122	1.16388E-4
3790.80937	0.00213	4.50591E-5	1.45127	1.13181E-4
3789.84503	0.00205	4.08704E-5	1.45123	1.06507E-4
3788.88069	0.00205	4.17677E-5	1.45114	1.15087E-4
3787.91636	0.00214	4.99423E-5	1.4511	1.11355E-4
3786.95202	0.0022	5.58636E-5	1.45115	1.05212E-4
3785.98768	0.00219	6.15391E-5	1.45122	9.84396E-5
3785.02335	0.00212	4.75467E-5	1.45126	9.86128E-5
3784.05901	0.00207	3.95618E-5	1.45121	1.02312E-4
3783.09467	0.00208	3.67867E-5	1.45119	1.05597E-4
3782.13033	0.00205	3.66277E-5	1.4512	1.02795E-4
3781.166	0.00201	3.98281E-5	1.45117	1.16604E-4
3780.20166	0.002	4.52051E-5	1.45115	1.1752E-4
3779.23732	0.00193	4.27634E-5	1.4511	1.05655E-4
3778.27299	0.00198	3.68081E-5	1.45096	1.01694E-4
3777.30865	0.00208	3.5021E-5	1.45097	1.01559E-4
3776.34431	0.00209	3.59116E-5	1.45099	1.0593E-4
3775.37997	0.00212	4.44267E-5	1.45098	1.19834E-4
3774.41564	0.00216	5.82573E-5	1.45102	1.0356E-4
3773.4513	0.00214	4.52589E-5	1.45107	8.98115E-5
3772.48696	0.0021	4.03486E-5	1.45107	9.26806E-5
3771.52263	0.0021	4.77578E-5	1.45106	9.58919E-5
3770.55829	0.00207	6.1205E-5	1.45114	9.00449E-5
3769.59395	0.00189	6.12139E-5	1.4511	1.05675E-4
3768.62961	0.00189	4.29421E-5	1.45087	1.25577E-4
3767.66528	0.00204	4.21778E-5	1.45081	1.24055E-4
3766.70094	0.00214	5.13759E-5	1.45088	1.05055E-4
3765.7366	0.0021	6.06369E-5	1.45096	9.80201E-5
3764.77227	0.00207	5.33294E-5	1.45093	1.08655E-4
3763.80793	0.00208	4.27753E-5	1.45094	1.16697E-4
3762.84359	0.00205	4.27934E-5	1.45091	1.19542E-4
3761.87925	0.00208	4.28121E-5	1.45089	1.24759E-4
3760.91492	0.00211	5.55642E-5	1.45092	1.17208E-4
3759.95058	0.00203	6.8541E-5	1.45098	1.12789E-4
3758.98624	0.00196	5.77594E-5	1.45085	1.17739E-4
3758.02191	0.00206	5.78359E-5	1.45079	1.1448E-4
3757.05757	0.00209	7.10033E-5	1.45085	9.81013E-5
3756.09323	0.00202	6.30237E-5	1.45085	1.11042E-4
3755.12889	0.00206	4.99228E-5	1.45076	1.25307E-4
3754.16456	0.00214	5.70623E-5	1.45077	1.40418E-4
3753.20022	0.00224	1.05466E-4	1.45086	1.25141E-4
3752.23588	0.00207	1.39626E-4	1.45107	1.00049E-4
3751.27155	0.00184	8.16077E-5	1.45083	1.32511E-4
3750.30721	0.00206	9.31523E-5	1.45068	1.20924E-4
3749.34287	0.00213	1.19893E-4	1.45086	1.07385E-4
3748.37853	0.00195	7.53093E-5	1.45088	1.16406E-4
3747.4142	0.00196	5.47582E-5	1.45073	8.65332E-5
3746.44986	0.00195	5.31635E-5	1.45071	1.00932E-4
3745.48552	0.00221	1.48885E-4	1.45049	1.40375E-4
3744.52119	0.00242	2.94307E-4	1.4511	1.31263E-4
3743.55685	0.00168	7.06803E-5	1.4511	2.48095E-4
3742.59251	0.00184	3.81195E-5	1.4506	1.54964E-4
3741.62817	0.00199	4.48084E-5	1.45073	1.44586E-4
3740.66384	0.00199	4.06186E-5	1.45076	1.1698E-4
3739.6995	0.00186	3.82097E-5	1.45082	1.39406E-4
3738.73516	0.00179	4.64784E-5	1.45068	1.15502E-4
3737.77083	0.00181	4.17641E-5	1.4506	1.00769E-4
3736.80649	0.00186	7.6336E-5	1.45054	1.10547E-4
3735.84215	0.00186	7.79132E-5	1.45053	1.46725E-4
3734.87781	0.00189	8.14316E-5	1.45046	1.32185E-4
3733.91348	0.00191	6.22082E-5	1.45045	1.28064E-4
3732.94914	0.002	6.91474E-5	1.45039	1.12171E-4
3731.9848	0.00204	8.49372E-5	1.45047	1.21429E-4
3731.02047	0.00205	5.67765E-5	1.45045	1.34048E-4
3730.05613	0.00208	4.57404E-5	1.45053	1.18636E-4
3729.09179	0.002	4.45575E-5	1.45055	1.04718E-4
3728.12745	0.00196	5.28288E-5	1.4505	1.16451E-4
3727.16312	0.002	5.78346E-5	1.45045	1.24925E-4
3726.19878	0.002	5.88869E-5	1.45048	1.27125E-4
3725.23444	0.00199	5.74191E-5	1.45046	1.13855E-4
3724.2701	0.00198	4.84916E-5	1.45049	1.01763E-4
3723.30577	0.00193	5.63816E-5	1.45045	9.96173E-5
3722.34143	0.00194	6.31063E-5	1.45041	1.23023E-4
3721.37709	0.00196	3.77485E-5	1.45039	1.31236E-4
3720.41276	0.00194	3.64793E-5	1.4504	1.19079E-4
3719.44842	0.00191	4.77751E-5	1.45036	1.19251E-4
3718.48408	0.00191	4.38494E-5	1.45029	1.41473E-4
3717.51974	0.00197	3.70431E-5	1.45023	1.44633E-4
3716.55541	0.00204	4.51966E-5	1.45022	1.33667E-4
3715.59107	0.00213	4.98792E-5	1.45028	1.15437E-4
3714.62673	0.00208	4.2705E-5	1.4504	1.09002E-4
3713.6624	0.002	4.06232E-5	1.45038	1.10526E-4
3712.69806	0.00195	6.55852E-5	1.45039	1.01919E-4
3711.73372	0.00186	7.23385E-5	1.4503	1.22674E-4
3710.76938	0.00192	5.60545E-5	1.45018	1.35038E-4
3709.80505	0.00198	5.65545E-5	1.45021	1.21666E-4
3708.84071	0.00194	5.20408E-5	1.45019	1.35526E-4
3707.87637	0.00199	4.33563E-5	1.45013	1.44022E-4
3706.91204	0.00205	4.68239E-5	1.45016	1.3596E-4
3705.9477	0.00206	4.8884E-5	1.45017	1.24155E-4
3704.98336	0.00208	4.69559E-5	1.4502	1.1118E-4
3704.01902	0.00205	3.54367E-5	1.45027	1.02862E-4
3703.05469	0.00192	3.60243E-5	1.45026	1.08392E-4
3702.09035	0.0019	4.95813E-5	1.45011	1.2398E-4
3701.12601	0.00202	5.29142E-5	1.45007	1.26373E-4
3700.16168	0.00206	4.45537E-5	1.45011	1.15828E-4
3699.19734	0.00207	4.04319E-5	1.45015	1.20523E-4
3698.233	0.00207	4.40094E-5	1.45021	1.12015E-4
3697.26866	0.00198	4.10159E-5	1.45027	1.06086E-4
3696.30433	0.00188	4.07853E-5	1.4502	1.13607E-4
3695.33999	0.00186	3.83167E-5	1.45011	1.18525E-4
3694.37565	0.00192	4.03487E-5	1.45005	1.14907E-4
3693.41132	0.00197	4.07539E-5	1.45007	1.17507E-4
3692.44698	0.00198	4.57063E-5	1.45015	1.06189E-4
3691.48264	0.00186	6.14282E-5	1.45022	1.05062E-4
3690.5183	0.00173	5.3341E-5	1.45013	1.31379E-4
3689.55397	0.00167	4.16691E-5	1.45009	1.32725E-4
3688.58963	0.00149	6.14215E-5	1.44992	1.26627E-4
3687.62529	0.00159	4.41454E-5	1.44956	1.50558E-4
3686.66096	0.00192	3.05641E-5	1.44949	1.51301E-4
3685.69662	0.00205	3.4857E-5	1.44965	1.42498E-4
3684.73228	0.00205	3.26958E-5	1.44972	1.42113E-4
3683.76794	0.00205	4.03942E-5	1.44975	1.35492E-4
3682.80361	0.00204	3.97642E-5	1.44976	1.26406E-4
3681.83927	0.00202	4.04717E-5	1.44974	1.30954E-4
3680.87493	0.00208	5.55293E-5	1.44972	1.3445E-4
3679.9106	0.00209	5.93984E-5	1.4498	1.18287E-4
3678.94626	0.00203	4.03489E-5	1.44979	1.17238E-4
3677.98192	0.00203	3.94036E-5	1.44975	1.33014E-4
3677.01758	0.00211	7.96625E-5	1.44972	1.25504E-4
3676.05325	0.00215	1.48773E-4	1.44991	9.30119E-5
3675.08891	0.00184	1.18482E-4	1.44993	1.52058E-4
3674.12457	0.00183	5.33462E-5	1.44965	1.58174E-4
3673.16024	0.00193	4.41071E-5	1.44961	1.29546E-4
3672.1959	0.002	5.23804E-5	1.44955	1.31197E-4
3671.23156	0.00212	8.64481E-5	1.44964	1.29631E-4
3670.26722	0.00201	8.60923E-5	1.44973	1.39618E-4
3669.30289	0.00195	7.45185E-5	1.44962	1.55631E-4
3668.33855	0.00203	5.51179E-5	1.44956	1.78578E-4
3667.37421	0.00207	3.51042E-5	1.44961	1.72303E-4
3666.40988	0.00203	3.71553E-5	1.44962	1.5978E-4
3665.44554	0.00202	4.17521E-5	1.44959	1.56594E-4
3664.4812	0.00204	4.5941E-5	1.44956	1.60365E-4
3663.51686	0.00207	4.58741E-5	1.44955	1.63058E-4
3662.55253	0.00211	4.81454E-5	1.44959	1.53191E-4
3661.58819	0.00207	4.52095E-5	1.44965	1.51225E-4
3660.62385	0.00199	5.44696E-5	1.44963	1.47671E-4
3659.65952	0.00198	5.37529E-5	1.44959	1.24125E-4
3658.69518	0.00194	3.83332E-5	1.44958	1.17072E-4
3657.73084	0.00192	3.81175E-5	1.4495	1.26055E-4
3656.7665	0.00195	6.06039E-5	1.44948	1.21541E-4
3655.80217	0.00192	5.54394E-5	1.44945	1.29219E-4
3654.83783	0.00198	4.44672E-5	1.44939	1.40212E-4
3653.87349	0.00201	4.75893E-5	1.44943	1.47838E-4
3652.90916	0.00202	3.93791E-5	1.44941	1.70917E-4
3651.94482	0.00208	7.89882E-5	1.44952	1.52598E-4
3650.98048	0.00184	7.15573E-5	1.44967	1.13758E-4
3650.01614	0.00154	5.25025E-5	1.4494	1.14127E-4
3649.05181	0.00167	6.24327E-5	1.44901	1.43139E-4
3648.08747	0.00198	7.30046E-5	1.44895	1.60486E-4
3647.12313	0.00209	8.62628E-5	1.44907	1.62764E-4
3646.1588	0.00209	7.11115E-5	1.44909	1.61401E-4
3645.19446	0.00216	6.4692E-5	1.44908	1.55718E-4
3644.23012	0.00222	6.52072E-5	1.44914	1.41392E-4
3643.26578	0.00223	5.69277E-5	1.4492	1.28565E-4
3642.30145	0.00222	5.24249E-5	1.44926	1.25218E-4
3641.33711	0.00218	5.28436E-5	1.44932	1.18299E-4
3640.37277	0.00208	4.23264E-5	1.44934	1.08086E-4
3639.40844	0.00202	4.56823E-5	1.44925	1.17221E-4
3638.4441	0.00208	4.45006E-5	1.44919	1.28134E-4
3637.47976	0.0021	4.16016E-5	1.44924	1.21193E-4
3636.51542	0.00203	4.1553E-5	1.44924	1.20606E-4
3635.55109	0.002	4.1888E-5	1.44916	1.29738E-4
3634.58675	0.00203	4.46143E-5	1.4491	1.29552E-4
3633.62241	0.00208	4.82827E-5	1.44908	1.28082E-4
3632.65807	0.00213	4.22882E-5	1.4491	1.29609E-4
3631.69374	0.00214	4.14397E-5	1.44917	1.27166E-4
3630.7294	0.00208	6.22175E-5	1.4492	1.17421E-4
3629.76506	0.00203	1.16889E-4	1.44922	1.09038E-4
3628.80073	0.00186	1.25071E-4	1.44923	1.53822E-4
3627.83639	0.00174	7.47918E-5	1.44897	1.89328E-4
3626.87205	0.00196	5.50386E-5	1.44875	1.95196E-4
3625.90771	0.00216	5.05158E-5	1.44886	1.88881E-4
3624.94338	0.00211	4.26318E-5	1.44898	1.65369E-4
3623.97904	0.00204	3.95065E-5	1.44892	1.63562E-4
3623.0147	0.00212	5.29466E-5	1.44885	1.64505E-4
3622.05037	0.00223	6.5617E-5	1.44894	1.48635E-4
3621.08603	0.00218	5.90178E-5	1.44909	1.21483E-4
3620.12169	0.00199	4.94814E-5	1.44913	1.13219E-4
3619.15735	0.00185	4.67483E-5	1.44898	1.20556E-4
3618.19302	0.00187	5.15568E-5	1.4488	1.43015E-4
3617.22868	0.00198	4.97604E-5	1.44871	1.73722E-4
3616.26434	0.00208	5.21333E-5	1.44871	1.77817E-4
3615.30001	0.00211	6.0403E-5	1.44876	1.4563E-4
3614.33567	0.00211	5.40705E-5	1.44877	1.32505E-4
3613.37133	0.00211	5.72518E-5	1.44879	1.35505E-4
3612.40699	0.00206	6.05805E-5	1.44876	1.41816E-4
3611.44266	0.00212	4.78843E-5	1.44869	1.50544E-4
3610.47832	0.00221	5.42981E-5	1.44877	1.33446E-4
3609.51398	0.0021	7.1351E-5	1.44888	1.31287E-4
3608.54965	0.00198	6.16259E-5	1.44878	1.59853E-4
3607.58531	0.00201	5.25176E-5	1.44869	1.70435E-4
3606.62097	0.00203	4.19722E-5	1.44863	1.96901E-4
3605.65663	0.00214	6.28286E-5	1.4486	1.94664E-4
3604.6923	0.00219	7.6324E-5	1.44871	1.44087E-4
3603.72796	0.0021	4.1362E-5	1.44879	1.23385E-4
3602.76362	0.00198	3.45144E-5	1.44875	1.32571E-4
3601.79929	0.00196	3.95374E-5	1.44864	1.48994E-4
3600.83495	0.00199	3.98725E-5	1.4486	1.78279E-4
3599.87061	0.00198	4.02955E-5	1.44857	1.81892E-4
3598.90627	0.00198	4.07118E-5	1.44851	1.66116E-4
3597.94194	0.00202	4.55831E-5	1.44844	1.74089E-4
3596.9776	0.00211	6.4366E-5	1.44842	1.88627E-4
3596.01326	0.00218	9.28092E-5	1.44848	1.58369E-4
3595.04893	0.00216	8.18053E-5	1.44855	1.34938E-4
3594.08459	0.00212	6.21245E-5	1.44859	1.27864E-4
3593.12025	0.00203	4.44309E-5	1.4486	1.22602E-4
3592.15591	0.00197	3.37153E-5	1.44855	1.25127E-4
3591.19158	0.00192	4.19953E-5	1.44848	1.36468E-4
3590.22724	0.00194	5.15893E-5	1.44837	1.44892E-4
3589.2629	0.00201	5.2653E-5	1.44839	1.3928E-4
3588.29857	0.00195	5.09538E-5	1.44841	1.49732E-4
3587.33423	0.00192	4.78094E-5	1.44833	1.79649E-4
3586.36989	0.00193	5.32788E-5	1.44827	1.80818E-4
3585.40555	0.00195	5.78205E-5	1.44821	1.60932E-4
3584.44122	0.00203	5.67717E-5	1.44816	1.48787E-4
3583.47688	0.00208	5.9375E-5	1.44821	1.46416E-4
3582.51254	0.00202	5.73531E-5	1.44824	1.42297E-4
3581.54821	0.00199	5.68211E-5	1.44816	1.33657E-4
3580.58387	0.00204	4.16514E-5	1.44812	1.302E-4
3579.61953	0.00205	4.34617E-5	1.44811	1.37237E-4
3578.65519	0.00208	5.00966E-5	1.44807	1.47669E-4
3577.69086	0.00213	5.95587E-5	1.44809	1.43554E-4
3576.72652	0.00213	6.02854E-5	1.44811	1.35004E-4
3575.76218	0.00214	5.76506E-5	1.44813	1.28861E-4
3574.79785	0.0021	5.0184E-5	1.44817	1.28766E-4
3573.83351	0.00205	4.34759E-5	1.44812	1.32754E-4
3572.86917	0.00207	4.1545E-5	1.4481	1.31297E-4
3571.90483	0.00205	3.90668E-5	1.44812	1.35856E-4
3570.9405	0.00198	3.98052E-5	1.44809	1.48085E-4
3569.97616	0.00197	4.13033E-5	1.44802	1.55377E-4
3569.01182	0.00199	5.27847E-5	1.44799	1.44668E-4
3568.04749	0.00199	6.69719E-5	1.44797	1.34091E-4
3567.08315	0.00197	6.93407E-5	1.44798	1.34982E-4
3566.11881	0.00189	6.50975E-5	1.44791	1.54305E-4
3565.15447	0.00194	4.99754E-5	1.44778	1.78631E-4
3564.19014	0.00202	4.25327E-5	1.44779	1.81225E-4
3563.2258	0.00202	4.79229E-5	1.44781	1.71025E-4
3562.26146	0.00199	4.89631E-5	1.4478	1.63759E-4
3561.29713	0.00195	4.40459E-5	1.44777	1.51605E-4
3560.33279	0.00195	3.51857E-5	1.44766	1.45478E-4
3559.36845	0.00203	3.34367E-5	1.44761	1.55329E-4
3558.40411	0.0021	3.9754E-5	1.44761	1.66861E-4
3557.43978	0.00215	5.56205E-5	1.44766	1.52622E-4
3556.47544	0.00211	5.28649E-5	1.44773	1.35601E-4
3555.5111	0.00203	4.28067E-5	1.44773	1.35161E-4
3554.54677	0.00197	3.82136E-5	1.44765	1.47944E-4
3553.58243	0.002	3.62845E-5	1.4476	1.54637E-4
3552.61809	0.00198	3.72194E-5	1.44762	1.48133E-4
3551.65375	0.0019	3.58799E-5	1.44752	1.55592E-4
3550.68942	0.00196	3.0345E-5	1.44741	1.60133E-4
3549.72508	0.00201	2.63248E-5	1.44739	1.63071E-4
3548.76074	0.00206	3.58603E-5	1.44733	1.84753E-4
3547.79641	0.00216	6.27967E-5	1.44738	1.74215E-4
3546.83207	0.00211	5.08329E-5	1.44749	1.61122E-4
3545.86773	0.00196	4.53805E-5	1.44746	1.60635E-4
3544.90339	0.00191	4.21145E-5	1.4473	1.50672E-4
3543.93906	0.00201	3.85011E-5	1.44719	1.50104E-4
3542.97472	0.00206	4.18451E-5	1.44719	1.56241E-4
3542.01038	0.00207	4.06196E-5	1.44712	1.55904E-4
3541.04604	0.00218	4.2168E-5	1.44708	1.63102E-4
3540.08171	0.00226	5.15998E-5	1.44714	1.6359E-4
3539.11737	0.00226	5.01627E-5	1.4472	1.62277E-4
3538.15303	0.00224	5.54942E-5	1.44726	1.55926E-4
3537.1887	0.00211	4.18034E-5	1.44728	1.47712E-4
3536.22436	0.00201	3.23385E-5	1.44712	1.58924E-4
3535.26002	0.00214	4.3506E-5	1.44697	1.65549E-4
3534.29568	0.00226	5.11535E-5	1.44702	1.55322E-4
3533.33135	0.00226	5.37998E-5	1.44709	1.52388E-4
3532.36701	0.00223	5.3082E-5	1.4471	1.4409E-4
3531.40267	0.00219	4.69591E-5	1.4471	1.37109E-4
3530.43834	0.00214	4.26884E-5	1.44705	1.50913E-4
3529.474	0.00218	4.09546E-5	1.44696	1.75105E-4
3528.50966	0.00228	5.92049E-5	1.44699	1.68047E-4
3527.54532	0.00222	5.2082E-5	1.44707	1.55987E-4
3526.58099	0.00217	4.54949E-5	1.44702	1.64302E-4
3525.61665	0.00217	4.57819E-5	1.44702	1.67437E-4
3524.65231	0.00207	4.73442E-5	1.44703	1.6132E-4
3523.68798	0.00196	4.63999E-5	1.44689	1.55548E-4
3522.72364	0.00201	3.61547E-5	1.44671	1.61501E-4
3521.7593	0.00213	3.80187E-5	1.44665	1.72254E-4
3520.79496	0.00222	4.54859E-5	1.44665	1.75539E-4
3519.83063	0.00226	5.40205E-5	1.44669	1.66204E-4
3518.86629	0.00224	5.20546E-5	1.44669	1.6499E-4
3517.90195	0.00225	5.00492E-5	1.44666	1.73302E-4
3516.93762	0.00229	5.96879E-5	1.44666	1.7004E-4
3515.97328	0.0023	6.3844E-5	1.44669	1.63251E-4
3515.00894	0.00227	6.42628E-5	1.44672	1.61217E-4
3514.0446	0.00219	6.86473E-5	1.44671	1.53992E-4
3513.08027	0.00215	6.1138E-5	1.4466	1.42159E-4
3512.11593	0.00222	4.62412E-5	1.44652	1.37801E-4
3511.15159	0.00228	4.29974E-5	1.44654	1.43916E-4
3510.18726	0.00225	4.85115E-5	1.44656	1.59303E-4
3509.22292	0.00224	4.49636E-5	1.44654	1.6976E-4
3508.25858	0.00224	4.46869E-5	1.44654	1.61109E-4
3507.29424	0.00218	4.22967E-5	1.44652	1.59576E-4
3506.32991	0.00217	4.50661E-5	1.44646	1.65739E-4
3505.36557	0.00218	4.13071E-5	1.44644	1.68485E-4
3504.40123	0.00214	3.84795E-5	1.44644	1.72698E-4
3503.4369	0.00207	4.37621E-5	1.44639	1.67243E-4
3502.47256	0.00202	4.59996E-5	1.44625	1.6063E-4
3501.50822	0.0021	3.73551E-5	1.4461	1.64035E-4
3500.54388	0.00222	2.93958E-5	1.44608	1.70136E-4
3499.57955	0.00224	2.64121E-5	1.44614	1.78277E-4
3498.61521	0.00216	3.19004E-5	1.4461	1.85028E-4
3497.65087	0.00217	4.53718E-5	1.44594	1.93112E-4
3496.68654	0.00235	7.01031E-5	1.44586	1.92299E-4
3495.7222	0.00249	9.12677E-5	1.44596	1.68954E-4
3494.75786	0.00247	7.79377E-5	1.4461	1.43542E-4
3493.79352	0.00234	4.63955E-5	1.44613	1.3672E-4
3492.82919	0.00229	3.83277E-5	1.44602	1.48941E-4
3491.86485	0.00234	4.12054E-5	1.44599	1.58677E-4
3490.90051	0.00228	4.52322E-5	1.44602	1.59837E-4
3489.93618	0.00221	4.60693E-5	1.44591	1.71316E-4
3488.97184	0.0023	4.63063E-5	1.44582	1.74098E-4
3488.0075	0.0023	4.48534E-5	1.44587	1.64494E-4
3487.04316	0.00221	3.89644E-5	1.44578	1.75104E-4
3486.07883	0.00228	4.13188E-5	1.44564	1.85088E-4
3485.11449	0.00239	5.73439E-5	1.44563	1.718E-4
3484.15015	0.00241	5.22962E-5	1.44564	1.7007E-4
3483.18582	0.00245	4.78581E-5	1.44564	1.82599E-4
3482.22148	0.00244	5.2997E-5	1.4457	1.86425E-4
3481.25714	0.00236	5.24908E-5	1.44567	1.95155E-4
3480.2928	0.00236	6.31181E-5	1.44557	1.97365E-4
3479.32847	0.00238	6.89557E-5	1.44553	1.76431E-4
3478.36413	0.00239	5.24138E-5	1.44547	1.68905E-4
3477.39979	0.00248	5.89545E-5	1.44541	1.74133E-4
3476.43546	0.00255	6.63667E-5	1.44547	1.6147E-4
3475.47112	0.0025	5.55414E-5	1.44552	1.47049E-4
3474.50678	0.00243	4.51415E-5	1.44549	1.56134E-4
3473.54244	0.00241	4.65794E-5	1.44541	1.81136E-4
3472.57811	0.00242	4.3327E-5	1.44536	1.96733E-4
3471.61377	0.00244	4.84192E-5	1.44531	2.03975E-4
3470.64943	0.00246	6.23851E-5	1.44531	1.97065E-4
3469.6851	0.00242	6.51386E-5	1.44528	1.77402E-4
3468.72076	0.00241	5.60207E-5	1.44521	1.66651E-4
3467.75642	0.00239	4.42106E-5	1.44516	1.69499E-4
3466.79208	0.0024	4.30097E-5	1.44501	1.85523E-4
3465.82775	0.00257	5.63075E-5	1.44494	1.84696E-4
3464.86341	0.00262	5.52059E-5	1.44506	1.71178E-4
3463.89907	0.00254	5.36333E-5	1.44505	1.68525E-4
3462.93474	0.00254	5.70087E-5	1.44496	1.70684E-4
3461.9704	0.00258	4.83579E-5	1.44491	1.93597E-4
3461.00606	0.0026	5.4861E-5	1.44493	1.92998E-4
3460.04172	0.00251	4.8654E-5	1.44486	1.71961E-4
3459.07739	0.00261	4.33549E-5	1.44467	1.82284E-4
3458.11305	0.0028	6.36842E-5	1.44473	1.81319E-4
3457.14871	0.00277	6.22967E-5	1.44485	1.64165E-4
3456.18437	0.00268	4.92655E-5	1.44481	1.65068E-4
3455.22004	0.00266	4.47547E-5	1.44472	1.84469E-4
3454.2557	0.00271	4.60232E-5	1.44463	2.05715E-4
3453.29136	0.0028	6.05461E-5	1.44458	2.15925E-4
3452.32703	0.00289	7.64578E-5	1.44462	1.98854E-4
3451.36269	0.00288	6.54657E-5	1.44467	1.85021E-4
3450.39835	0.00287	6.0453E-5	1.44466	1.90731E-4
3449.43401	0.00287	6.54424E-5	1.44466	1.90491E-4
3448.46968	0.00286	6.47409E-5	1.44467	1.87604E-4
3447.50534	0.00279	5.92488E-5	1.44464	1.86071E-4
3446.541	0.00278	5.93929E-5	1.44451	1.86317E-4
3445.57667	0.00292	6.16942E-5	1.44447	1.82689E-4
3444.61233	0.00293	5.67837E-5	1.44458	1.86401E-4
3443.64799	0.00283	6.05022E-5	1.44456	1.9588E-4
3442.68365	0.00282	7.16326E-5	1.44449	1.82548E-4
3441.71932	0.00284	6.47314E-5	1.44446	1.73422E-4
3440.75498	0.00283	5.76392E-5	1.44442	1.89812E-4
3439.79064	0.00286	5.48563E-5	1.44438	2.07075E-4
3438.82631	0.00289	7.07227E-5	1.44439	2.04927E-4
3437.86197	0.00285	8.00452E-5	1.44442	1.86733E-4
3436.89763	0.00279	7.31715E-5	1.4444	1.68252E-4
3435.93329	0.00271	6.39657E-5	1.44435	1.63588E-4
3434.96896	0.00267	5.92534E-5	1.44425	1.67548E-4
3434.00462	0.00267	5.26847E-5	1.44416	1.67151E-4
3433.04028	0.00266	5.86117E-5	1.44408	1.69534E-4
3432.07595	0.00267	5.79393E-5	1.44399	1.79319E-4
3431.11161	0.00268	4.84056E-5	1.44391	1.8393E-4
3430.14727	0.00271	4.13785E-5	1.44382	1.84595E-4
3429.18293	0.00275	4.84536E-5	1.44374	1.95584E-4
3428.2186	0.00283	6.16477E-5	1.44366	2.06236E-4
3427.25426	0.00292	6.43864E-5	1.44367	1.98224E-4
3426.28992	0.00289	5.46619E-5	1.44369	1.96626E-4
3425.32559	0.00287	5.78674E-5	1.44362	1.9909E-4
3424.36125	0.00285	6.53034E-5	1.44352	2.05124E-4
3423.39691	0.00293	6.22899E-5	1.44338	2.25263E-4
3422.43257	0.00308	6.72647E-5	1.44337	2.26426E-4
3421.46824	0.00313	7.82927E-5	1.44342	2.14879E-4
3420.5039	0.00311	8.28E-5	1.44344	1.96603E-4
3419.53956	0.00307	7.35442E-5	1.44341	1.87972E-4
3418.57523	0.00306	7.43894E-5	1.44332	1.91912E-4
3417.61089	0.00311	6.82043E-5	1.44325	1.92157E-4
3416.64655	0.00315	6.42168E-5	1.44322	2.01128E-4
3415.68221	0.00317	5.6373E-5	1.44318	2.23002E-4
3414.71788	0.00321	6.25196E-5	1.44313	2.25862E-4
3413.75354	0.00324	7.59112E-5	1.44311	2.22288E-4
3412.7892	0.00324	8.46941E-5	1.44306	2.09465E-4
3411.82487	0.00329	8.12977E-5	1.44298	2.00651E-4
3410.86053	0.00339	8.51505E-5	1.44299	2.00572E-4
3409.89619	0.00337	8.26584E-5	1.44302	1.96046E-4
3408.93185	0.00333	6.995E-5	1.44296	2.02747E-4
3407.96752	0.00336	7.06636E-5	1.44288	1.99873E-4
3407.00318	0.00341	6.84704E-5	1.44281	1.99188E-4
3406.03884	0.00353	7.68379E-5	1.44277	2.07254E-4
3405.07451	0.0036	8.55837E-5	1.44288	1.8976E-4
3404.11017	0.00348	7.32539E-5	1.44296	1.82343E-4
3403.14583	0.00333	7.18037E-5	1.44289	2.01474E-4
3402.18149	0.00326	6.7058E-5	1.44268	2.19488E-4
3401.21716	0.00336	7.69762E-5	1.44247	2.20229E-4
3400.25282	0.00352	8.7939E-5	1.44242	2.0515E-4
3399.28848	0.00359	8.4872E-5	1.44241	1.97275E-4
3398.32415	0.00368	8.82611E-5	1.44237	1.90958E-4
3397.35981	0.00377	8.14703E-5	1.44243	1.7487E-4
3396.39547	0.00372	6.82539E-5	1.44247	1.79521E-4
3395.43113	0.00369	6.7168E-5	1.44238	2.06516E-4
3394.4668	0.00376	7.96787E-5	1.44234	2.15183E-4
3393.50246	0.00375	8.47671E-5	1.4424	1.98435E-4
3392.53812	0.00359	7.62848E-5	1.44233	1.86776E-4
3391.57379	0.00356	7.44917E-5	1.44205	1.98867E-4
3390.60945	0.00379	7.35788E-5	1.44183	2.11147E-4
3389.64511	0.00403	7.97116E-5	1.44185	2.17285E-4
3388.68077	0.00415	9.10665E-5	1.44196	2.18364E-4
3387.71644	0.00413	9.93093E-5	1.44206	2.02504E-4
3386.7521	0.00408	9.64114E-5	1.44201	1.96761E-4
3385.78776	0.00417	9.45544E-5	1.44197	1.94054E-4
3384.82343	0.00416	1.00364E-4	1.44203	1.91453E-4
3383.85909	0.00409	1.06278E-4	1.44196	2.17048E-4
3382.89475	0.00416	9.61876E-5	1.44187	2.4396E-4
3381.93041	0.00418	9.86427E-5	1.44189	2.35572E-4
3380.96608	0.00413	9.84448E-5	1.44179	2.23229E-4
3380.00174	0.00425	9.32939E-5	1.44164	2.29159E-4
3379.0374	0.0044	1.04084E-4	1.44169	2.21441E-4
3378.07307	0.00434	1.02412E-4	1.44176	2.05749E-4
3377.10873	0.00428	9.25959E-5	1.44159	2.17804E-4
3376.14439	0.00449	1.06709E-4	1.44147	2.1652E-4
3375.18005	0.00463	1.02532E-4	1.4416	1.92011E-4
3374.21572	0.00459	9.50793E-5	1.44166	1.98243E-4
3373.25138	0.00459	1.06022E-4	1.44166	2.13846E-4
3372.28704	0.00454	1.00878E-4	1.44168	2.31287E-4
3371.32271	0.00449	9.55555E-5	1.44165	2.3642E-4
3370.35837	0.00439	9.6324E-5	1.44159	2.15204E-4
3369.39403	0.00435	9.35823E-5	1.44136	2.09224E-4
3368.42969	0.00449	9.93276E-5	1.44123	2.01315E-4
3367.46536	0.00453	8.95234E-5	1.4412	1.95698E-4
3366.50102	0.00452	8.12562E-5	1.44102	2.17226E-4
3365.53668	0.00475	8.62224E-5	1.44075	2.50589E-4
3364.57234	0.00516	1.1482E-4	1.4408	2.5807E-4
3363.60801	0.00528	1.33943E-4	1.4411	2.32091E-4
3362.64367	0.0052	1.24036E-4	1.4412	2.15183E-4
3361.67933	0.00517	1.17593E-4	1.44123	1.99724E-4
3360.715	0.00507	1.07972E-4	1.44122	1.88569E-4
3359.75066	0.00505	1.0025E-4	1.44104	2.02078E-4
3358.78632	0.00525	1.11388E-4	1.44092	2.23748E-4
3357.82198	0.00543	1.31444E-4	1.44105	2.19692E-4
3356.85765	0.00537	1.2431E-4	1.44121	2.01244E-4
3355.89331	0.00527	1.09814E-4	1.44113	2.05211E-4
3354.92897	0.00539	1.13384E-4	1.44102	2.14259E-4
3353.96464	0.00551	1.17565E-4	1.44115	2.16718E-4
3353.0003	0.00542	1.11152E-4	1.4413	2.18196E-4
3352.03596	0.00523	1.08819E-4	1.44131	2.09513E-4
3351.07162	0.00504	1.13424E-4	1.44111	2.08449E-4
3350.10729	0.00512	1.19511E-4	1.4408	2.11918E-4
3349.14295	0.00536	1.2138E-4	1.44071	2.11265E-4
3348.17861	0.00548	1.14886E-4	1.44078	2.22962E-4
3347.21428	0.0055	1.16909E-4	1.44078	2.31087E-4
3346.24994	0.0056	1.31944E-4	1.44075	2.27862E-4
3345.2856	0.00568	1.38363E-4	1.44088	2.23935E-4
3344.32126	0.00551	1.18073E-4	1.44097	2.37472E-4
3343.35693	0.00539	1.0017E-4	1.44075	2.56902E-4
3342.39259	0.00559	1.20841E-4	1.44056	2.43053E-4
3341.42825	0.00578	1.28897E-4	1.44069	2.24304E-4
3340.46392	0.00571	1.1874E-4	1.44085	2.28632E-4
3339.49958	0.00552	1.15165E-4	1.44084	2.21E-4
3338.53524	0.00537	1.16402E-4	1.44063	2.15034E-4
3337.5709	0.00548	1.24425E-4	1.44034	2.3114E-4
3336.60657	0.00573	1.38887E-4	1.44027	2.32448E-4
3335.64223	0.00584	1.45568E-4	1.44034	2.11926E-4
3334.67789	0.00586	1.38422E-4	1.44038	2.04953E-4
3333.71356	0.00583	1.32268E-4	1.44036	2.17296E-4
3332.74922	0.00587	1.34031E-4	1.44024	2.33613E-4
3331.78488	0.00601	1.41479E-4	1.44021	2.33095E-4
3330.82054	0.00605	1.3356E-4	1.44027	2.36037E-4
3329.85621	0.00604	1.29829E-4	1.44024	2.579E-4
3328.89187	0.00614	1.36968E-4	1.44018	2.62947E-4
3327.92753	0.00627	1.39882E-4	1.44033	2.30441E-4
3326.9632	0.00606	1.26184E-4	1.44052	2.11939E-4
3325.99886	0.00575	1.26081E-4	1.44027	2.25316E-4
3325.03452	0.00592	1.28618E-4	1.43986	2.42637E-4
3324.07018	0.00627	1.43189E-4	1.4399	2.30538E-4
3323.10585	0.00625	1.36224E-4	1.4401	2.13556E-4
3322.14151	0.00611	1.36732E-4	1.44001	2.17314E-4
3321.17717	0.00616	1.60037E-4	1.43984	2.43943E-4
3320.21284	0.00628	1.62179E-4	1.43976	2.72321E-4
3319.2485	0.00641	1.58473E-4	1.43973	2.71835E-4
3318.28416	0.00651	1.5982E-4	1.43981	2.47634E-4
3317.31982	0.00644	1.49764E-4	1.43986	2.38848E-4
3316.35549	0.00641	1.51756E-4	1.43975	2.55566E-4
3315.39115	0.00649	1.62876E-4	1.43971	2.69854E-4
3314.42681	0.00648	1.63722E-4	1.43966	2.81633E-4
3313.46248	0.00658	1.51499E-4	1.43951	3.04216E-4
3312.49814	0.00681	1.57118E-4	1.43959	2.89674E-4
3311.5338	0.00673	1.53759E-4	1.43979	2.73589E-4
3310.56946	0.00658	1.44641E-4	1.43971	2.96231E-4
3309.60513	0.0066	1.47451E-4	1.43965	2.83942E-4
3308.64079	0.00649	1.42295E-4	1.43963	2.54416E-4
3307.67645	0.00639	1.46347E-4	1.43942	2.66252E-4
3306.71212	0.00643	1.57536E-4	1.4392	2.68562E-4
3305.74778	0.00647	1.56658E-4	1.43899	2.53E-4
3304.78344	0.00668	1.57999E-4	1.43867	2.48895E-4
3303.8191	0.00714	1.74047E-4	1.4386	2.45132E-4
3302.85477	0.00739	1.82578E-4	1.43887	2.35592E-4
3301.89043	0.00731	1.853E-4	1.43903	2.34171E-4
3300.92609	0.00727	1.98477E-4	1.43895	2.7142E-4
3299.96176	0.00741	1.85444E-4	1.43887	3.19222E-4
3298.99742	0.00757	1.7943E-4	1.43897	3.08308E-4
3298.03308	0.0075	1.77929E-4	1.43909	2.93051E-4
3297.06874	0.00743	1.83817E-4	1.43902	2.88715E-4
3296.10441	0.00746	1.87255E-4	1.43898	2.70729E-4
3295.14007	0.00742	1.83039E-4	1.43889	2.63221E-4
3294.17573	0.00754	1.97157E-4	1.43875	2.50334E-4
3293.2114	0.00764	2.06575E-4	1.43883	2.35066E-4
3292.24706	0.00751	1.90082E-4	1.43875	2.22491E-4
3291.28272	0.00765	1.78258E-4	1.43847	2.19386E-4
3290.31838	0.00795	1.9084E-4	1.43847	2.37129E-4
3289.35405	0.00802	2.04637E-4	1.4386	2.51439E-4
3288.38971	0.00806	2.08873E-4	1.43858	2.5981E-4
3287.42537	0.00813	2.19842E-4	1.4386	2.61505E-4
3286.46104	0.00812	2.20782E-4	1.43857	2.81535E-4
3285.4967	0.00824	2.06942E-4	1.43845	3.0259E-4
3284.53236	0.00848	2.17869E-4	1.43849	3.1564E-4
3283.56802	0.0086	2.30213E-4	1.43869	3.18376E-4
3282.60369	0.00849	2.15177E-4	1.4389	2.84614E-4
3281.63935	0.00823	2.12342E-4	1.43887	2.83462E-4
3280.67501	0.00816	2.21208E-4	1.43857	3.21968E-4
3279.71068	0.00839	2.22199E-4	1.43834	3.41678E-4
3278.74634	0.00868	2.28018E-4	1.43838	3.39031E-4
3277.782	0.0088	2.15054E-4	1.43856	3.3487E-4
3276.81766	0.00878	2.10107E-4	1.43873	3.43001E-4
3275.85333	0.00861	2.24411E-4	1.43881	3.25283E-4
3274.88899	0.00847	2.20028E-4	1.43865	2.85381E-4
3273.92465	0.00858	2.13346E-4	1.43849	2.86284E-4
3272.96031	0.00862	2.11046E-4	1.43857	3.12107E-4
3271.99598	0.00844	2.16728E-4	1.43851	3.29426E-4
3271.03164	0.00837	2.07979E-4	1.43823	3.33546E-4
3270.0673	0.00849	1.93683E-4	1.43789	3.24805E-4
3269.10297	0.00886	2.08131E-4	1.43763	3.23839E-4
3268.13863	0.00928	2.24547E-4	1.43769	3.29586E-4
3267.17429	0.00949	2.33432E-4	1.43787	3.26875E-4
3266.20995	0.00961	2.43597E-4	1.438	3.24998E-4
3265.24562	0.00972	2.44584E-4	1.43813	3.30146E-4
3264.28128	0.00978	2.44652E-4	1.43831	3.02016E-4
3263.31694	0.00967	2.37402E-4	1.43848	2.85466E-4
3262.35261	0.00951	2.40553E-4	1.43842	3.06915E-4
3261.38827	0.0096	2.43336E-4	1.43823	3.30641E-4
3260.42393	0.00984	2.49306E-4	1.43831	3.40847E-4
3259.45959	0.0098	2.37505E-4	1.43853	3.51094E-4
3258.49526	0.00969	2.14866E-4	1.43851	3.62554E-4
3257.53092	0.0097	2.17418E-4	1.43852	3.65164E-4
3256.56658	0.00955	2.20589E-4	1.4385	3.64457E-4
3255.60225	0.00957	2.22616E-4	1.43824	3.45429E-4
3254.63791	0.00983	2.24954E-4	1.43822	3.18852E-4
3253.67357	0.00985	2.16771E-4	1.43837	3.13789E-4
3252.70923	0.0098	2.126E-4	1.43834	3.19906E-4
3251.7449	0.00982	2.18083E-4	1.43832	3.28449E-4
3250.78056	0.0098	2.29529E-4	1.43828	3.56632E-4
3249.81622	0.00987	2.23479E-4	1.43818	4.07596E-4
3248.85189	0.00999	2.13607E-4	1.43823	4.37827E-4
3247.88755	0.0099	2.33107E-4	1.43831	3.95993E-4
3246.92321	0.0098	2.26029E-4	1.43814	3.28285E-4
3245.95887	0.00996	2.05032E-4	1.43794	3.21515E-4
3244.99454	0.01017	2.00981E-4	1.43796	3.38988E-4
3244.0302	0.01021	2.13856E-4	1.43804	3.4935E-4
3243.06586	0.01026	2.26085E-4	1.43801	3.80086E-4
3242.10153	0.01038	2.20673E-4	1.43805	4.00769E-4
3241.13719	0.0104	2.1132E-4	1.43815	3.88625E-4
3240.17285	0.01034	2.03977E-4	1.43821	3.67562E-4
3239.20851	0.01023	2.1934E-4	1.43816	3.71393E-4
3238.24418	0.01025	2.21479E-4	1.43799	4.04054E-4
3237.27984	0.0104	2.04489E-4	1.43796	4.16737E-4
3236.3155	0.01045	2.1009E-4	1.43802	4.07841E-4
3235.35117	0.01043	2.30194E-4	1.43805	3.93205E-4
3234.38683	0.01033	2.3292E-4	1.43804	3.60703E-4
3233.42249	0.01023	2.1842E-4	1.43781	3.27142E-4
3232.45815	0.01045	2.15873E-4	1.43756	3.29938E-4
3231.49382	0.0107	2.20757E-4	1.43761	3.46875E-4
3230.52948	0.01075	2.0594E-4	1.43765	3.58331E-4
3229.56514	0.0109	2.09858E-4	1.43764	3.61713E-4
3228.60081	0.01098	2.36737E-4	1.43776	3.68564E-4
3227.63647	0.01098	2.43495E-4	1.43781	4.07681E-4
3226.67213	0.01099	2.17243E-4	1.43789	4.34063E-4
3225.70779	0.01088	1.91368E-4	1.43791	4.20736E-4
3224.74346	0.01087	1.86182E-4	1.43779	3.94784E-4
3223.77912	0.01091	1.9962E-4	1.43782	3.90883E-4
3222.81478	0.01076	2.03424E-4	1.43773	4.41206E-4
3221.85045	0.01086	2.01448E-4	1.43745	4.77847E-4
3220.88611	0.0111	2.10814E-4	1.43745	4.77268E-4
3219.92177	0.01113	2.18432E-4	1.43748	4.67991E-4
3218.95743	0.01124	2.34616E-4	1.4374	4.45124E-4
3217.9931	0.01141	2.3809E-4	1.43747	4.253E-4
3217.02876	0.01141	2.28122E-4	1.43762	3.97831E-4
3216.06442	0.0113	2.07543E-4	1.43763	3.90677E-4
3215.10009	0.01123	2.03977E-4	1.43752	4.10941E-4
3214.13575	0.01129	2.13657E-4	1.43734	4.3099E-4
3213.17141	0.01148	2.20173E-4	1.43726	4.49521E-4
3212.20707	0.01163	2.27916E-4	1.43731	4.58269E-4
3211.24274	0.01169	2.47718E-4	1.43737	4.41314E-4
3210.2784	0.0117	2.41678E-4	1.43738	4.1893E-4
3209.31406	0.01182	2.34356E-4	1.43737	4.11955E-4
3208.34973	0.01185	2.28869E-4	1.43754	4.00044E-4
3207.38539	0.01166	2.06715E-4	1.43754	4.02828E-4
3206.42105	0.01167	2.1363E-4	1.43731	4.30194E-4
3205.45671	0.01186	2.36846E-4	1.43726	4.30665E-4
3204.49238	0.01196	2.39565E-4	1.43731	4.20545E-4
3203.52804	0.01201	2.39812E-4	1.43739	4.1337E-4
3202.5637	0.01194	2.35219E-4	1.43744	3.99497E-4
3201.59937	0.01192	2.1976E-4	1.43736	3.98523E-4
3200.63503	0.01193	2.09112E-4	1.43736	4.12208E-4
3199.67069	0.01189	2.09372E-4	1.43723	4.3603E-4
3198.70635	0.01207	2.25455E-4	1.43712	4.46644E-4
3197.74202	0.01219	2.32245E-4	1.43723	4.35965E-4
3196.77768	0.01214	2.21769E-4	1.43731	4.22773E-4
3195.81334	0.01204	2.13293E-4	1.43726	4.20371E-4
3194.84901	0.01204	2.28638E-4	1.43707	4.49923E-4
3193.88467	0.01222	2.41339E-4	1.43697	4.71459E-4
3192.92033	0.01233	2.29103E-4	1.43703	4.58549E-4
3191.95599	0.01237	2.20528E-4	1.43705	4.60213E-4
3190.99166	0.01241	2.33586E-4	1.43708	4.71517E-4
3190.02732	0.01239	2.52087E-4	1.4371	4.69784E-4
3189.06298	0.01237	2.58026E-4	1.43706	4.48211E-4
3188.09865	0.01236	2.43763E-4	1.437	4.42932E-4
3187.13431	0.01238	2.3912E-4	1.43691	4.61652E-4
3186.16997	0.01245	2.4601E-4	1.4368	4.74571E-4
3185.20563	0.0126	2.58678E-4	1.43677	4.80976E-4
3184.2413	0.01264	2.74866E-4	1.43685	4.65449E-4
3183.27696	0.01262	2.78484E-4	1.43677	4.44006E-4
3182.31262	0.01276	2.75836E-4	1.43674	4.24808E-4
3181.34828	0.01275	2.54616E-4	1.43682	4.2111E-4
3180.38395	0.0127	2.50843E-4	1.43668	4.47866E-4
3179.41961	0.01289	2.77298E-4	1.43658	4.56951E-4
3178.45527	0.01301	2.78868E-4	1.43669	4.34871E-4
3177.49094	0.01295	2.59362E-4	1.43677	4.22993E-4
3176.5266	0.0129	2.5524E-4	1.43667	4.35627E-4
3175.56226	0.01303	2.57346E-4	1.43659	4.44818E-4
3174.59792	0.01307	2.59059E-4	1.43667	4.43094E-4
3173.63359	0.01302	2.64896E-4	1.43662	4.6147E-4
3172.66925	0.01309	2.76599E-4	1.43657	4.74046E-4
3171.70491	0.01309	2.83754E-4	1.43653	4.75217E-4
3170.74058	0.01322	2.99501E-4	1.43642	4.68504E-4
3169.77624	0.01338	3.03137E-4	1.43656	4.48686E-4
3168.8119	0.01326	2.9127E-4	1.43668	4.50233E-4
3167.84756	0.01314	2.91127E-4	1.43664	4.37874E-4
3166.88323	0.01302	2.67376E-4	1.43651	4.33089E-4
3165.91889	0.01306	2.65553E-4	1.43627	4.76432E-4
3164.95455	0.0132	2.84786E-4	1.43617	5.04802E-4
3163.99022	0.01328	2.94859E-4	1.43606	4.91781E-4
3163.02588	0.01349	3.02928E-4	1.43595	4.84068E-4
3162.06154	0.01374	3.23986E-4	1.43603	4.76068E-4
3161.0972	0.01384	3.43209E-4	1.43624	4.59039E-4
3160.13287	0.01375	3.36211E-4	1.43643	4.43286E-4
3159.16853	0.01358	3.14205E-4	1.43648	4.37736E-4
3158.20419	0.01337	3.03246E-4	1.43643	4.4191E-4
3157.23986	0.01326	3.04533E-4	1.43618	4.62716E-4
3156.27552	0.01336	3.15296E-4	1.43603	4.6887E-4
3155.31118	0.01332	3.17761E-4	1.43594	4.75175E-4
3154.34684	0.01339	3.48219E-4	1.43573	4.95233E-4
3153.38251	0.01347	3.87425E-4	1.43572	4.62358E-4
3152.41817	0.01334	3.70701E-4	1.43551	4.22834E-4
3151.45383	0.01357	3.41294E-4	1.43515	4.30149E-4
3150.4895	0.01391	3.35318E-4	1.43511	4.39282E-4
3149.52516	0.01407	3.34946E-4	1.43514	4.376E-4
3148.56082	0.01425	3.31063E-4	1.43516	4.42461E-4
3147.59648	0.01434	3.33683E-4	1.43525	4.46259E-4
3146.63215	0.0144	3.50201E-4	1.43523	4.59146E-4
3145.66781	0.01456	3.74208E-4	1.43527	4.48209E-4
3144.70347	0.0146	3.64823E-4	1.43542	4.23656E-4
3143.73914	0.01449	3.43998E-4	1.43548	4.29422E-4
3142.7748	0.01443	3.48658E-4	1.43535	4.56491E-4
3141.81046	0.01461	3.82935E-4	1.43528	4.70222E-4
3140.84612	0.01462	4.18172E-4	1.43551	4.33423E-4
3139.88179	0.01429	4.06835E-4	1.43548	3.99163E-4
3138.91745	0.0142	3.69713E-4	1.43512	3.99513E-4
3137.95311	0.01435	3.4157E-4	1.43487	4.18843E-4
3136.98878	0.01452	3.34501E-4	1.43472	4.48123E-4
3136.02444	0.01472	3.46185E-4	1.4346	4.62959E-4
3135.0601	0.01498	3.56358E-4	1.43461	4.55117E-4
3134.09576	0.01508	3.50939E-4	1.43475	4.34584E-4
3133.13143	0.01504	3.42071E-4	1.43471	4.52229E-4
3132.16709	0.01526	3.72195E-4	1.4346	4.94964E-4
3131.20275	0.01541	4.25046E-4	1.43488	4.82391E-4
3130.23842	0.01509	4.28154E-4	1.43497	4.41443E-4
3129.27408	0.01503	3.96518E-4	1.43459	4.29585E-4
3128.30974	0.01536	3.91535E-4	1.43447	4.29477E-4
3127.3454	0.0155	3.94612E-4	1.43463	4.13691E-4
3126.38107	0.01542	3.63875E-4	1.43472	4.12395E-4
3125.41673	0.01533	3.50347E-4	1.43463	4.57091E-4
3124.45239	0.01537	3.83112E-4	1.43447	4.87417E-4
3123.48806	0.01553	4.22902E-4	1.43441	4.821E-4
3122.52372	0.01557	4.49298E-4	1.43454	4.59866E-4
3121.55938	0.01532	4.44445E-4	1.43452	4.38814E-4
3120.59504	0.01522	4.29497E-4	1.43412	4.44995E-4
3119.63071	0.01551	4.28341E-4	1.43379	4.60904E-4
3118.66637	0.01582	4.55424E-4	1.43377	4.71698E-4
3117.70203	0.01594	4.92453E-4	1.43383	4.46835E-4
3116.7377	0.01598	4.75224E-4	1.43377	4.03956E-4
3115.77336	0.01616	4.50902E-4	1.43362	3.98371E-4
3114.80902	0.01645	4.52213E-4	1.43363	3.94346E-4
3113.84468	0.01662	4.22279E-4	1.43381	3.79264E-4
3112.88035	0.01663	3.94981E-4	1.43396	3.83061E-4
3111.91601	0.01654	3.81937E-4	1.43406	4.01859E-4
3110.95167	0.01641	3.91177E-4	1.43398	4.39623E-4
3109.98734	0.01641	4.43893E-4	1.43383	4.50319E-4
3109.023	0.0164	4.63305E-4	1.43367	4.06345E-4
3108.05866	0.01659	4.25159E-4	1.43334	3.93311E-4
3107.09432	0.01709	4.13384E-4	1.43332	3.94565E-4
3106.12999	0.01732	4.15837E-4	1.43367	3.77332E-4
3105.16565	0.01723	4.00228E-4	1.43392	3.78682E-4
3104.20131	0.01709	4.03571E-4	1.43397	3.95846E-4
3103.23698	0.01703	4.22693E-4	1.43395	4.01792E-4
3102.27264	0.01695	4.2692E-4	1.43396	4.1341E-4
3101.3083	0.0168	4.29443E-4	1.43385	4.23508E-4
3100.34396	0.01676	4.31547E-4	1.43362	4.04577E-4
3099.37963	0.01687	4.07171E-4	1.43339	4.00311E-4
3098.41529	0.01708	3.98551E-4	1.43327	4.26237E-4
3097.45095	0.01725	4.26968E-4	1.43332	4.25855E-4
3096.48661	0.01726	4.28126E-4	1.43334	4.06294E-4
3095.52228	0.01735	4.14408E-4	1.43326	4.01933E-4
3094.55794	0.01748	4.15254E-4	1.43333	3.90915E-4
3093.5936	0.01744	3.96529E-4	1.43341	4.02304E-4
3092.62927	0.01738	4.08421E-4	1.4334	4.39332E-4
3091.66493	0.01728	4.62148E-4	1.43337	4.48884E-4
3090.70059	0.01715	4.87484E-4	1.43319	4.26365E-4
3089.73625	0.01721	4.69457E-4	1.43288	4.17338E-4
3088.77192	0.01747	4.58626E-4	1.43275	4.19225E-4
3087.80758	0.0176	4.68516E-4	1.43277	4.15263E-4
3086.84324	0.01774	4.87759E-4	1.43275	4.15592E-4
3085.87891	0.01784	5.13742E-4	1.43292	4.07628E-4
3084.91457	0.01762	5.07058E-4	1.43304	3.85956E-4
3083.95023	0.01742	4.74033E-4	1.43283	3.72108E-4
3082.98589	0.01745	4.39283E-4	1.43261	3.87252E-4
3082.02156	0.01746	4.2936E-4	1.43248	4.01582E-4
3081.05722	0.01748	4.472E-4	1.43228	3.99218E-4
3080.09288	0.01755	4.49077E-4	1.43212	3.88325E-4
3079.12855	0.01759	4.40921E-4	1.43191	3.90726E-4
3078.16421	0.01777	4.42768E-4	1.43166	4.03554E-4
3077.19987	0.01806	4.44542E-4	1.43156	3.94776E-4
3076.23553	0.01828	4.44279E-4	1.43164	3.80895E-4
3075.2712	0.01827	4.37787E-4	1.43176	3.6992E-4
3074.30686	0.01814	4.18891E-4	1.43162	3.61991E-4
3073.34252	0.01829	4.10081E-4	1.43139	3.83914E-4
3072.37819	0.0185	4.26055E-4	1.43139	4.04877E-4
[truncated: 2,408 more rows]
