# Supplementary material for: Mid-infrared complex refractive indices for oleic acid and optical properties of model oleic acid/water aerosols
Source: Royal Society of Chemistry journal article supplement (doi:10.1039/b905371a), 2009-01-01
Supplement: b905371a.pdf [file b905371a.pdf]

nu,k,sk,n,sn  
4999.12383,0.00394,2.45826E-4,1.4524,1.99097E-4  
4998.15949,0.00353,1.40539E-4,1.45315,1.19965E-4  
4997.19515,0.00341,1.29682E-4,1.45288,1.26142E-4  
4996.23082,0.0035,1.25126E-4,1.45298,1.33422E-4  
4995.26648,0.0036,1.21671E-4,1.45305,1.63063E-4  
4994.30214,0.00344,1.09224E-4,1.45326,1.34589E-4  
4993.33781,0.00335,1.12169E-4,1.45311,1.42186E-4  
4992.37347,0.00339,1.06031E-4,1.4531,1.73228E-4  
4991.40913,0.00344,1.04479E-4,1.45303,2.36026E-4  
4990.44479,0.00358,1.78932E-4,1.45302,2.8672E-4  
4989.48046,0.00377,2.8985E-4,1.45321,1.56036E-4  
4988.51612,0.00359,2.00156E-4,1.45348,6.69159E-5  
4987.55178,0.00339,1.13522E-4,1.45338,1.02141E-4  
4986.58745,0.00339,1.60367E-4,1.45319,2.00857E-4  
4985.62311,0.0037,3.18458E-4,1.45315,1.43901E-4  
4984.65877,0.00375,2.31604E-4,1.45346,1.43254E-4  
4983.69443,0.00364,1.7199E-4,1.45355,1.00209E-4  
4982.7301,0.00356,1.6571E-4,1.45359,1.35959E-4  
4981.76576,0.00358,1.93777E-4,1.45361,1.19676E-4  
4980.80142,0.00351,1.60807E-4,1.45374,1.02199E-4  
4979.83708,0.00338,1.59931E-4,1.4538,8.76226E-5  
4978.87275,0.00312,1.41308E-4,1.45375,1.01108E-4  
4977.90841,0.00315,1.19818E-4,1.4534,1.30045E-4  
4976.94407,0.00341,1.36653E-4,1.45341,1.30089E-4  
4975.97974,0.00348,1.24848E-4,1.45356,1.04318E-4  
4975.0154,0.00342,9.88258E-5,1.45369,9.62099E-5  
4974.05106,0.00329,1.05981E-4,1.45373,7.90062E-5  
4973.08672,0.00316,9.94129E-5,1.45362,1.00316E-4  
4972.12239,0.0033,1.03367E-4,1.45351,1.25851E-4  
4971.15805,0.00328,9.32963E-5,1.45366,1.21083E-4  
4970.19371,0.00317,9.47315E-5,1.45353,1.09707E-4  
4969.22938,0.0033,1.06867E-4,1.45345,1.24828E-4  
4968.26504,0.00336,1.25614E-4,1.45353,1.26548E-4  
4967.3007,0.0033,1.19067E-4,1.45355,1.06302E-4  
4966.33636,0.00334,1.11032E-4,1.45346,1.0282E-4  
4965.37203,0.00344,1.18546E-4,1.45346,1.15238E-4  
4964.40769,0.00357,1.25269E-4,1.45354,1.13354E-4  
4963.44335,0.00357,1.00962E-4,1.45376,1.65221E-4  
4962.47902,0.00339,1.01292E-4,1.45385,2.18584E-4  
4961.51468,0.00327,1.72957E-4,1.45372,2.45499E-4  
4960.55034,0.00341,2.8E-4,1.45363,1.61518E-4  
4959.586,0.00344,2.75078E-4,1.4538,8.21442E-5  
4958.62167,0.00328,2.09477E-4,1.45385,1.11361E-4  
4957.65733,0.0032,1.34713E-4,1.4537,1.17528E-4  
4956.69299,0.00334,1.35186E-4,1.45361,9.06011E-5  
4955.72866,0.00341,1.58819E-4,1.45368,1.21894E-4  
4954.76432,0.00344,2.25905E-4,1.45374,8.92266E-5  
4953.79998,0.00339,1.81388E-4,1.45382,9.68488E-5  
4952.83564,0.00336,1.41405E-4,1.45374,8.55947E-5  
4951.87131,0.00351,1.65011E-4,1.45376,7.45033E-5  
4950.90697,0.00354,1.59199E-4,1.45399,1.04216E-4  
4949.94263,0.00329,9.91759E-5,1.45411,1.16341E-4  
4948.9783,0.00315,9.08386E-5,1.45397,8.42394E-5  
4948.01396,0.00315,1.09335E-4,1.45384,9.59809E-5  
4947.04962,0.00327,1.44405E-4,1.45376,9.51788E-5  
4946.08528,0.00337,1.61223E-4,1.45387,8.86308E-5  
4945.12095,0.00333,1.47185E-4,1.45399,8.2577E-5  
4944.15661,0.00318,9.92765E-5,1.45404,9.26509E-5  
4943.19227,0.00307,8.94718E-5,1.45393,1.03938E-4  
4942.22794,0.00307,1.14345E-4,1.4538,9.42782E-5  
4941.2636,0.0032,1.37848E-4,1.45371,6.98264E-5  
4940.29926,0.00331,1.40636E-4,1.45377,6.66773E-5  
4939.33492,0.00333,1.09721E-4,1.45386,9.03056E-5  
4938.37059,0.00328,7.66043E-5,1.45392,1.10785E-4

4937.40625,0.00322,9.8766E-5,1.45389,1.12178E-4  
4936.44191,0.00326,1.53508E-4,1.4538,1.16573E-4  
4935.47758,0.00344,2.36866E-4,1.45386,7.52211E-5  
4934.51324,0.0034,1.72082E-4,1.45407,1.4851E-4  
4933.5489,0.00328,8.83033E-5,1.4541,1.28161E-4  
4932.58456,0.0032,9.15126E-5,1.45412,9.57363E-5  
4931.62023,0.00311,1.06282E-4,1.45408,1.00703E-4  
4930.65589,0.00309,1.22076E-4,1.45397,8.80592E-5  
4929.69155,0.0032,1.52723E-4,1.45392,8.09108E-5  
4928.72722,0.00326,1.24136E-4,1.45407,1.35538E-4  
4927.76288,0.00314,9.6006E-5,1.45418,1.17507E-4  
4926.79854,0.00295,7.8147E-5,1.45413,9.28012E-5  
4925.8342,0.00292,7.48437E-5,1.45394,1.13557E-4  
4924.86987,0.00301,1.08583E-4,1.45389,9.79177E-5  
4923.90553,0.00302,8.72822E-5,1.45388,8.60444E-5  
4922.94119,0.00304,9.5223E-5,1.45384,8.03043E-5  
4921.97686,0.00306,8.61599E-5,1.4538,1.07803E-4  
4921.01252,0.00311,9.35279E-5,1.4537,1.58558E-4  
4920.04818,0.00335,1.9261E-4,1.45369,1.14486E-4  
4919.08384,0.00346,1.75901E-4,1.45393,8.63213E-5  
4918.11951,0.00334,1.10166E-4,1.45406,1.07383E-4  
4917.15517,0.00333,1.78389E-4,1.45404,1.23651E-4  
4916.19083,0.00339,2.48007E-4,1.45421,9.96001E-5  
4915.2265,0.00313,1.15908E-4,1.45436,1.53387E-4  
4914.26216,0.00295,6.20697E-5,1.45418,8.29407E-5  
4913.29782,0.00301,9.49586E-5,1.45405,7.13391E-5  
4912.33348,0.00305,1.63501E-4,1.45408,7.4805E-5  
4911.36915,0.00296,1.23041E-4,1.45405,1.20219E-4  
4910.40481,0.00302,9.10616E-5,1.45394,1.00698E-4  
4909.44047,0.00309,1.03966E-4,1.45398,1.1292E-4  
4908.47614,0.00311,9.34117E-5,1.45397,1.34975E-4  
4907.5118,0.00315,1.02888E-4,1.45403,1.10485E-4  
4906.54746,0.00309,8.21384E-5,1.45408,8.03934E-5  
4905.58312,0.00307,1.03073E-4,1.45401,8.86216E-5  
4904.61879,0.00318,1.74271E-4,1.45406,9.23169E-5  
4903.65445,0.00309,1.1431E-4,1.45419,1.66779E-4  
4902.69011,0.00299,1.21099E-4,1.45415,1.26498E-4  
4901.72578,0.00295,8.33235E-5,1.45408,1.23089E-4  
4900.76144,0.003,6.90262E-5,1.45402,1.0509E-4  
4899.7971,0.00301,9.08869E-5,1.45407,9.21375E-5  
4898.83276,0.003,5.43993E-5,1.45403,1.01905E-4  
4897.86843,0.00301,6.13201E-5,1.45408,8.25992E-5  
4896.90409,0.00292,5.61037E-5,1.45405,9.13059E-5  
4895.93975,0.00294,6.95148E-5,1.45397,1.06466E-4  
4894.97542,0.00297,9.45996E-5,1.45396,1.01189E-4  
4894.01108,0.00297,8.2179E-5,1.45389,1.1785E-4  
4893.04674,0.00314,1.13746E-4,1.45384,1.50139E-4  
4892.0824,0.00323,1.68776E-4,1.45407,1.04108E-4  
4891.11807,0.00304,9.82719E-5,1.45415,9.73422E-5  
4890.15373,0.00296,9.394E-5,1.45405,7.95341E-5  
4889.18939,0.00296,1.20696E-4,1.45399,7.15095E-5  
4888.22505,0.00297,9.94092E-5,1.45392,7.80543E-5  
4887.26072,0.00308,1.18152E-4,1.45384,8.46809E-5  
4886.29638,0.0032,1.30098E-4,1.45391,9.14359E-5  
4885.33204,0.00322,1.00574E-4,1.45399,9.35957E-5  
4884.36771,0.00323,1.14234E-4,1.45405,7.92921E-5  
4883.40337,0.00324,1.26294E-4,1.45414,8.95684E-5  
4882.43903,0.00316,1.05285E-4,1.45425,9.7932E-5  
4881.47469,0.00299,9.638E-5,1.45423,8.19708E-5  
4880.51036,0.00296,8.56212E-5,1.45408,1.01743E-4  
4879.54602,0.00307,9.25235E-5,1.45405,1.01853E-4  
4878.58168,0.00306,1.05052E-4,1.4541,9.46848E-5  
4877.61735,0.00308,1.39254E-4,1.45406,7.37724E-5  
4876.65301,0.00316,1.40448E-4,1.45412,5.93114E-5  
4875.68867,0.00309,1.35138E-4,1.45425,7.82976E-5

4874.72433,0.00293,1.29103E-4,1.4542,1.14727E-4  
4873.76,0.00295,9.43382E-5,1.45404,1.19855E-4  
4872.79566,0.00307,8.06049E-5,1.45403,1.09677E-4  
4871.83132,0.0031,9.66236E-5,1.45412,1.16038E-4  
4870.86699,0.00303,8.90917E-5,1.45414,1.22517E-4  
4869.90265,0.00301,9.12241E-5,1.45407,9.30497E-5  
4868.93831,0.00312,8.15489E-5,1.45401,9.31084E-5  
4867.97397,0.00325,1.12346E-4,1.45416,8.97458E-5  
4867.00964,0.0031,8.30714E-5,1.45432,9.42062E-5  
4866.0453,0.003,7.0333E-5,1.45419,9.18272E-5  
4865.08096,0.0031,9.2294E-5,1.45419,1.10004E-4  
4864.11663,0.00305,7.99145E-5,1.45431,1.02609E-4  
4863.15229,0.00288,6.85522E-5,1.45426,1.00293E-4  
4862.18795,0.00292,8.99387E-5,1.45409,1.29324E-4  
4861.22361,0.00305,1.53587E-4,1.45409,1.13521E-4  
4860.25928,0.0031,1.7152E-4,1.45417,9.1496E-5  
4859.29494,0.00307,1.21543E-4,1.45426,1.33151E-4  
4858.3306,0.00297,7.54758E-5,1.45429,1.28866E-4  
4857.36627,0.00291,8.37863E-5,1.45421,8.23663E-5  
4856.40193,0.00295,1.02974E-4,1.45415,7.34057E-5  
4855.43759,0.00297,9.82073E-5,1.45414,9.87684E-5  
4854.47325,0.00303,9.22119E-5,1.45412,9.3279E-5  
4853.50892,0.00304,9.46811E-5,1.4542,8.44177E-5  
4852.54458,0.00299,8.98367E-5,1.45419,7.95767E-5  
4851.58024,0.003,8.20588E-5,1.45416,8.20458E-5  
4850.61591,0.00304,9.98478E-5,1.45412,9.9583E-5  
4849.65157,0.00313,1.20937E-4,1.45418,1.04317E-4  
4848.68723,0.00308,7.69694E-5,1.45428,1.19914E-4  
4847.72289,0.00303,1.15486E-4,1.45421,1.5401E-4  
4846.75856,0.00315,2.10407E-4,1.45426,1.03985E-4  
4845.79422,0.00305,1.08974E-4,1.45443,1.19314E-4  
4844.82988,0.0029,7.59288E-5,1.45436,7.35171E-5  
4843.86555,0.00291,1.25744E-4,1.45427,9.03188E-5  
4842.90121,0.00295,1.81759E-4,1.45426,8.57953E-5  
4841.93687,0.00289,1.35154E-4,1.45425,1.31204E-4  
4840.97253,0.00294,9.52937E-5,1.45413,1.4236E-4  
4840.0082,0.00309,1.00472E-4,1.45417,1.32959E-4  
4839.04386,0.00311,1.16426E-4,1.4543,9.03471E-5  
4838.07952,0.00298,1.32858E-4,1.45434,8.85219E-5  
4837.11519,0.00301,1.71411E-4,1.45422,9.46835E-5  
4836.15085,0.00314,1.6284E-4,1.45427,1.19793E-4  
4835.18651,0.00319,1.82198E-4,1.4544,1.28311E-4  
4834.22217,0.00311,1.66392E-4,1.45459,2.01295E-4  
4833.25784,0.00289,8.15452E-5,1.45464,2.11319E-4  
4832.2935,0.00273,6.67526E-5,1.4545,1.68064E-4  
4831.32916,0.00277,5.58779E-5,1.45433,1.49035E-4  
4830.36483,0.00286,6.53165E-5,1.45433,1.23821E-4  
4829.40049,0.0029,6.32878E-5,1.45433,8.17713E-5  
4828.43615,0.00291,1.09858E-4,1.45442,1.29685E-4  
4827.47181,0.0028,5.83229E-5,1.45444,1.78953E-4  
4826.50748,0.00277,6.52559E-5,1.45433,1.3478E-4  
4825.54314,0.00287,5.58837E-5,1.4543,1.31021E-4  
4824.5788,0.00291,8.36531E-5,1.45441,1.21049E-4  
4823.61447,0.0028,8.99441E-5,1.45448,9.71931E-5  
4822.65013,0.00269,6.584E-5,1.45439,9.00187E-5  
4821.68579,0.00274,7.00458E-5,1.45425,8.28273E-5  
4820.72145,0.00287,7.31675E-5,1.45427,7.97001E-5  
4819.75712,0.00288,5.94975E-5,1.45439,7.7541E-5  
4818.79278,0.00279,6.57781E-5,1.45444,8.17506E-5  
4817.82844,0.00271,6.90984E-5,1.45441,8.74279E-5  
4816.86411,0.00266,8.54246E-5,1.45432,9.11852E-5  
4815.89977,0.00272,9.70643E-5,1.45422,1.00678E-4  
4814.93543,0.0028,1.05755E-4,1.45424,9.1692E-5  
4813.97109,0.00279,9.426E-5,1.45427,9.55468E-5  
4813.00676,0.0028,7.47563E-5,1.45424,9.36434E-5

4812.04242,0.00286,8.46572E-5,1.45422,7.54895E-5  
4811.07808,0.00294,1.38464E-4,1.45431,7.78991E-5  
4810.11375,0.00287,1.16503E-4,1.45444,1.47225E-4  
4809.14941,0.00274,5.81681E-5,1.45441,1.63374E-4  
4808.18507,0.00274,6.75235E-5,1.45432,1.32526E-4  
4807.22073,0.00278,6.62649E-5,1.45429,1.00535E-4  
4806.2564,0.00281,6.31772E-5,1.45431,7.54324E-5  
4805.29206,0.0028,8.5169E-5,1.45432,8.39562E-5  
4804.32772,0.00283,1.17955E-4,1.45431,1.01636E-4  
4803.36339,0.00283,8.184E-5,1.45435,1.26692E-4  
4802.39905,0.00282,6.69319E-5,1.45437,1.00959E-4  
4801.43471,0.00277,6.63424E-5,1.45442,8.41805E-5  
4800.47037,0.00268,6.62137E-5,1.45436,9.11159E-5  
4799.50604,0.00275,9.06606E-5,1.45424,9.7794E-5  
4798.5417,0.00286,1.27888E-4,1.45431,9.1691E-5  
4797.57736,0.00279,1.24646E-4,1.45439,1.04406E-4  
4796.61302,0.00279,1.29779E-4,1.45433,1.1896E-4  
4795.64869,0.00283,1.17169E-4,1.4544,1.59818E-4  
4794.68435,0.00275,5.74084E-5,1.45444,1.66176E-4  
4793.72001,0.00269,4.42874E-5,1.45441,1.32278E-4  
4792.75568,0.00266,5.62079E-5,1.45433,1.09766E-4  
4791.79134,0.00272,5.99485E-5,1.45424,1.1895E-4  
4790.827,0.00285,6.85488E-5,1.45428,1.18516E-4  
4789.86266,0.00283,6.82406E-5,1.45441,1.15844E-4  
4788.89833,0.00275,6.34753E-5,1.45441,1.24904E-4  
4787.93399,0.00274,6.29064E-5,1.45437,1.19829E-4  
4786.96965,0.00276,7.56474E-5,1.45438,1.14016E-4  
4786.00532,0.00273,6.54334E-5,1.4544,1.44282E-4  
4785.04098,0.00271,4.73112E-5,1.45435,1.49108E-4  
4784.07664,0.00277,5.64028E-5,1.45433,1.30062E-4  
4783.1123,0.00279,6.44257E-5,1.45439,1.19868E-4  
4782.14797,0.00273,6.16675E-5,1.45441,1.14986E-4  
4781.18363,0.00271,6.96298E-5,1.45435,1.00058E-4  
4780.21929,0.00275,6.82141E-5,1.45432,9.8174E-5  
4779.25496,0.00283,6.05345E-5,1.45433,1.02812E-4  
4778.29062,0.00284,6.28911E-5,1.45441,9.93924E-5  
4777.32628,0.00282,6.57361E-5,1.45443,9.52702E-5  
4776.36194,0.00282,7.07328E-5,1.45442,9.14782E-5  
4775.39761,0.00287,7.43005E-5,1.45447,9.41753E-5  
4774.43327,0.00283,7.2693E-5,1.45456,1.25906E-4  
4773.46893,0.00278,5.41076E-5,1.45455,1.33813E-4  
4772.5046,0.00278,5.92996E-5,1.45462,1.22889E-4  
4771.54026,0.00265,5.47813E-5,1.45465,1.46203E-4  
4770.57592,0.00259,4.64273E-5,1.45451,1.61568E-4  
4769.61158,0.00271,8.12411E-5,1.45447,1.40626E-4  
4768.64725,0.00272,6.54499E-5,1.45456,1.38547E-4  
4767.68291,0.00269,5.99878E-5,1.45456,1.34415E-4  
4766.71857,0.00272,6.4354E-5,1.45459,1.47123E-4  
4765.75424,0.00268,7.8916E-5,1.45466,1.43045E-4  
4764.7899,0.0026,5.23563E-5,1.45466,1.40095E-4  
4763.82556,0.00258,6.1871E-5,1.45464,1.41288E-4  
4762.86122,0.00253,7.25438E-5,1.45464,1.43286E-4  
4761.89689,0.00253,6.6578E-5,1.45457,1.31636E-4  
4760.93255,0.00258,7.29785E-5,1.4546,1.27813E-4  
4759.96821,0.00256,7.78602E-5,1.45468,1.33465E-4  
4759.00388,0.00245,7.34173E-5,1.45468,1.35321E-4  
4758.03954,0.00245,7.96546E-5,1.45461,1.23175E-4  
4757.0752,0.00244,7.56408E-5,1.45467,1.08522E-4  
4756.11086,0.00232,6.81012E-5,1.45462,1.10182E-4  
4755.14653,0.00236,7.02202E-5,1.4545,1.26126E-4  
4754.18219,0.00244,8.2705E-5,1.45453,1.22437E-4  
4753.21785,0.00241,8.41187E-5,1.45458,1.21904E-4  
4752.25352,0.0024,8.73815E-5,1.45456,1.28029E-4  
4751.28918,0.00241,9.40959E-5,1.45459,1.14478E-4  
4750.32484,0.00237,9.19795E-5,1.45463,1.10395E-4

4749.3605,0.00232,9.37156E-5,1.45464,1.12908E-4  
4748.39617,0.00228,9.44421E-5,1.45468,1.00691E-4  
4747.43183,0.00213,8.70159E-5,1.45466,9.86271E-5  
4746.46749,0.00209,8.81242E-5,1.45451,1.02044E-4  
4745.50316,0.00211,8.96881E-5,1.45446,1.09778E-4  
4744.53882,0.00212,8.7299E-5,1.4544,1.04313E-4  
4743.57448,0.00213,8.30042E-5,1.45436,1.11623E-4  
4742.61014,0.00218,9.16789E-5,1.45427,1.20206E-4  
4741.64581,0.00232,1.11855E-4,1.45431,1.17054E-4  
4740.68147,0.00232,1.23871E-4,1.45443,1.03207E-4  
4739.71713,0.0022,1.12073E-4,1.45449,9.8863E-5  
4738.7528,0.00209,1.05823E-4,1.4544,1.014E-4  
4737.78846,0.00215,1.11553E-4,1.45424,8.87513E-5  
4736.82412,0.00231,1.13146E-4,1.45428,8.17851E-5  
4735.85978,0.00228,1.12409E-4,1.45442,7.48244E-5  
4734.89545,0.00219,1.03331E-4,1.45442,7.02813E-5  
4733.93111,0.00213,1.05094E-4,1.45439,7.8972E-5  
4732.96677,0.00212,1.10799E-4,1.45433,8.31696E-5  
4732.00244,0.00213,1.02353E-4,1.45432,8.72988E-5  
4731.0381,0.0021,1.03043E-4,1.45428,8.15968E-5  
4730.07376,0.00214,1.00325E-4,1.45423,7.10044E-5  
4729.10942,0.00217,9.79585E-5,1.45426,7.69659E-5  
4728.14509,0.00212,1.10503E-4,1.45425,7.32948E-5  
4727.18075,0.00217,1.08303E-4,1.4542,6.09012E-5  
4726.21641,0.00219,1.03618E-4,1.45426,6.30888E-5  
4725.25208,0.00214,9.71043E-5,1.45427,6.15308E-5  
4724.28774,0.00212,8.65183E-5,1.45427,6.05514E-5  
4723.3234,0.00208,8.98818E-5,1.45426,6.00301E-5  
4722.35906,0.00207,8.75166E-5,1.45422,5.76438E-5  
4721.39473,0.00206,7.72177E-5,1.45423,6.26138E-5  
4720.43039,0.00196,8.80742E-5,1.45419,6.26515E-5  
4719.46605,0.00197,9.43208E-5,1.45406,6.61061E-5  
4718.50172,0.00203,8.49244E-5,1.45401,7.58484E-5  
4717.53738,0.00208,8.42431E-5,1.45396,7.86815E-5  
4716.57304,0.00217,8.36073E-5,1.45397,6.81577E-5  
4715.6087,0.0022,8.20439E-5,1.45403,6.21302E-5  
4714.64437,0.00217,8.91942E-5,1.45406,5.83935E-5  
4713.68003,0.00215,8.34287E-5,1.45407,5.89241E-5  
4712.71569,0.00209,8.85083E-5,1.45407,7.05522E-5  
4711.75135,0.00205,1.04228E-4,1.45395,7.58759E-5  
4710.78702,0.00216,1.04772E-4,1.45388,6.73987E-5  
4709.82268,0.00219,8.89004E-5,1.45393,7.95072E-5  
4708.85834,0.00219,8.43345E-5,1.45386,8.98522E-5  
4707.89401,0.00237,7.9938E-5,1.45386,7.59314E-5  
4706.92967,0.00238,7.8903E-5,1.45406,5.85515E-5  
4705.96533,0.00224,8.92573E-5,1.45409,5.30059E-5  
4705.00099,0.00219,7.87602E-5,1.45403,5.66279E-5  
4704.03666,0.00217,6.82412E-5,1.45401,5.79674E-5  
4703.07232,0.00212,7.91258E-5,1.45393,7.13581E-5  
4702.10798,0.0022,8.93615E-5,1.4538,7.97752E-5  
4701.14365,0.00233,9.36778E-5,1.45384,7.95947E-5  
4700.17931,0.00234,9.80623E-5,1.45387,7.36959E-5  
4699.21497,0.00241,8.22934E-5,1.45385,7.75491E-5  
4698.25063,0.00251,7.1023E-5,1.45397,6.82358E-5  
4697.2863,0.00244,6.42863E-5,1.45407,6.21574E-5  
4696.32196,0.00241,6.22625E-5,1.45411,6.10874E-5  
4695.35762,0.00231,6.61064E-5,1.45415,5.35368E-5  
4694.39329,0.00229,6.01168E-5,1.45404,6.46522E-5  
4693.42895,0.00237,7.12544E-5,1.45409,8.30607E-5  
4692.46461,0.00229,9.97162E-5,1.45418,7.90401E-5  
4691.50027,0.0022,8.89654E-5,1.45412,7.88101E-5  
4690.53594,0.00222,7.99264E-5,1.45409,6.94369E-5  
4689.5716,0.00216,9.3923E-5,1.45413,6.7734E-5  
4688.60726,0.00207,9.31572E-5,1.45401,7.97187E-5  
4687.64293,0.00218,8.23845E-5,1.45392,8.09272E-5

4686.67859,0.00222,8.07385E-5,1.45402,6.48171E-5  
4685.71425,0.00207,8.13989E-5,1.45401,6.14819E-5  
4684.74991,0.00211,7.06246E-5,1.4538,7.65619E-5  
4683.78558,0.00232,6.49044E-5,1.45383,7.51878E-5  
4682.82124,0.00227,7.63392E-5,1.454,7.1709E-5  
4681.8569,0.00214,8.33151E-5,1.45391,6.8541E-5  
4680.89257,0.00228,7.10495E-5,1.45381,8.0412E-5  
4679.92823,0.00232,7.79896E-5,1.45398,7.45209E-5  
4678.96389,0.00216,9.88476E-5,1.45396,6.69834E-5  
4677.99955,0.00222,9.70142E-5,1.4538,7.33592E-5  
4677.03522,0.00235,7.36213E-5,1.45388,7.64956E-5  
4676.07088,0.00224,7.08959E-5,1.45397,7.85337E-5  
4675.10654,0.0022,8.61602E-5,1.45384,7.3586E-5  
4674.14221,0.00233,8.72786E-5,1.45381,7.16367E-5  
4673.17787,0.00236,9.10688E-5,1.45393,7.57999E-5  
4672.21353,0.00226,1.10827E-4,1.45394,6.89094E-5  
4671.24919,0.00229,1.02345E-4,1.45384,6.96383E-5  
4670.28486,0.00241,7.10637E-5,1.45391,6.30101E-5  
4669.32052,0.00233,7.04608E-5,1.45406,5.93224E-5  
4668.35618,0.0022,9.92618E-5,1.454,6.23763E-5  
4667.39185,0.00225,9.50056E-5,1.45393,7.40826E-5  
4666.42751,0.00226,6.30936E-5,1.45402,7.38185E-5  
4665.46317,0.00213,7.74918E-5,1.45402,6.191E-5  
4664.49883,0.00209,8.37253E-5,1.45389,7.58822E-5  
4663.5345,0.0022,6.85305E-5,1.45385,7.69251E-5  
4662.57016,0.00218,6.18158E-5,1.45396,5.95489E-5  
4661.60582,0.00201,8.08355E-5,1.45391,6.85832E-5  
4660.64149,0.00203,8.73774E-5,1.45369,8.44335E-5  
4659.67715,0.00224,6.62705E-5,1.45365,8.05174E-5  
4658.71281,0.00229,6.58579E-5,1.45382,6.4737E-5  
4657.74847,0.00213,8.17717E-5,1.45382,7.46159E-5  
4656.78414,0.00216,6.8445E-5,1.45365,9.53129E-5  
4655.8198,0.00234,5.27191E-5,1.45368,8.48661E-5  
4654.85546,0.0023,6.71611E-5,1.45382,7.31435E-5  
4653.89113,0.00219,8.56896E-5,1.45377,8.00568E-5  
4652.92679,0.00223,7.90418E-5,1.45366,8.95652E-5  
4651.96245,0.00238,6.01785E-5,1.45366,1.12456E-4  
4650.99811,0.0024,1.02765E-4,1.45386,6.92598E-5  
4650.03378,0.00218,7.37297E-5,1.45386,7.84648E-5  
4649.06944,0.00223,6.61757E-5,1.45365,8.16503E-5  
4648.1051,0.00241,5.5396E-5,1.45374,8.35943E-5  
4647.14077,0.00229,6.71679E-5,1.4539,7.69277E-5  
4646.17643,0.00214,8.73113E-5,1.45379,7.72953E-5  
4645.21209,0.00221,7.7849E-5,1.45365,9.06689E-5  
4644.24775,0.00231,5.22485E-5,1.4537,8.40823E-5  
4643.28342,0.00225,5.05282E-5,1.45376,8.15822E-5  
4642.31908,0.0022,7.55312E-5,1.45365,9.09807E-5  
4641.35474,0.00233,6.43732E-5,1.45359,1.06341E-4  
4640.39041,0.00245,4.63067E-5,1.45374,9.57236E-5  
4639.42607,0.00228,5.41215E-5,1.45391,7.51113E-5  
4638.46173,0.00203,6.54541E-5,1.45376,7.39592E-5  
4637.49739,0.00211,6.01742E-5,1.45344,9.02767E-5  
4636.53306,0.00243,5.45995E-5,1.45345,9.10389E-5  
4635.56872,0.00243,5.71365E-5,1.4537,8.35158E-5  
4634.60438,0.00226,6.56702E-5,1.45366,9.22871E-5  
4633.64005,0.00231,5.90417E-5,1.45352,1.20001E-4  
4632.67571,0.00246,7.70646E-5,1.45353,1.15215E-4  
4631.71137,0.0025,8.92122E-5,1.45369,8.20941E-5  
4630.74703,0.00236,6.83418E-5,1.45374,8.53197E-5  
4629.7827,0.0023,5.72633E-5,1.45362,9.05082E-5  
4628.81836,0.00243,5.18646E-5,1.45358,8.82622E-5  
4627.85402,0.00244,6.21268E-5,1.45372,7.65875E-5  
4626.88969,0.00229,6.84345E-5,1.45374,7.67917E-5  
4625.92535,0.00222,5.44774E-5,1.45358,9.48799E-5  
4624.96101,0.00232,4.34152E-5,1.45348,1.01324E-4

4623.99667,0.00239,4.58863E-5,1.45347,1.00454E-4  
4623.03234,0.00249,5.86715E-5,1.45345,1.0248E-4  
4622.068,0.00258,8.2812E-5,1.45353,8.50594E-5  
4621.10366,0.00258,6.60501E-5,1.4536,9.37666E-5  
4620.13932,0.00261,6.23978E-5,1.45368,8.54924E-5  
4619.17499,0.00252,6.35007E-5,1.45381,7.79296E-5  
4618.21065,0.00235,6.16505E-5,1.45379,9.8066E-5  
4617.24631,0.00228,4.52391E-5,1.45363,1.23984E-4  
4616.28198,0.00238,6.18331E-5,1.45347,1.29269E-4  
4615.31764,0.00257,8.98805E-5,1.45353,9.80998E-5  
4614.3533,0.00253,6.26601E-5,1.45369,8.67699E-5  
4613.38896,0.00244,5.01379E-5,1.45366,9.85474E-5  
4612.42463,0.00243,4.93353E-5,1.45363,9.7451E-5  
4611.46029,0.00242,4.12004E-5,1.45359,9.99544E-5  
4610.49595,0.00246,6.01398E-5,1.45355,9.41992E-5  
4609.53162,0.00252,6.64751E-5,1.45355,7.83585E-5  
4608.56728,0.00254,5.63234E-5,1.45358,7.87083E-5  
4607.60294,0.00255,4.9448E-5,1.4536,8.25423E-5  
4606.6386,0.00254,5.10265E-5,1.45363,8.15402E-5  
4605.67427,0.00248,5.17972E-5,1.45362,8.79441E-5  
4604.70993,0.00251,4.90061E-5,1.45353,9.60505E-5  
4603.74559,0.00264,4.83811E-5,1.45355,9.78E-5  
4602.78126,0.00266,5.59563E-5,1.45371,9.3589E-5  
4601.81692,0.0025,6.00599E-5,1.45377,7.97088E-5  
4600.85258,0.00238,5.4283E-5,1.45365,8.25796E-5  
4599.88824,0.00244,4.9618E-5,1.45347,1.12093E-4  
4598.92391,0.00262,6.89028E-5,1.45347,1.20476E-4  
4597.95957,0.00265,9.38222E-5,1.45361,8.38442E-5  
4596.99523,0.00257,6.72381E-5,1.45359,8.37814E-5  
4596.0309,0.00267,6.73583E-5,1.45353,9.00333E-5  
4595.06656,0.00271,6.79929E-5,1.45364,8.85359E-5  
4594.10222,0.00268,7.13237E-5,1.45366,8.68279E-5  
4593.13788,0.00271,6.48664E-5,1.4537,8.57448E-5  
4592.17355,0.00264,5.35054E-5,1.45377,6.98699E-5  
4591.20921,0.00256,4.28631E-5,1.45372,7.9376E-5  
4590.24487,0.00261,5.29968E-5,1.45368,1.01342E-4  
4589.28054,0.00262,7.66864E-5,1.45371,9.94366E-5  
4588.3162,0.00263,1.05216E-4,1.45373,8.24567E-5  
4587.35186,0.00259,9.03668E-5,1.4538,9.10396E-5  
4586.38752,0.00248,5.52586E-5,1.45374,1.00683E-4  
4585.42319,0.00252,6.59023E-5,1.45364,9.35736E-5  
4584.45885,0.00259,7.11615E-5,1.45365,8.25242E-5  
4583.49451,0.00259,7.25341E-5,1.45368,7.82035E-5  
4582.53018,0.00261,8.51787E-5,1.45368,7.52537E-5  
4581.56584,0.00259,7.5734E-5,1.4537,7.29222E-5  
4580.6015,0.00261,5.43284E-5,1.45366,8.24198E-5  
4579.63716,0.00266,5.28075E-5,1.4537,8.7246E-5  
4578.67283,0.00263,5.09861E-5,1.45376,8.97401E-5  
4577.70849,0.00258,5.69669E-5,1.45377,9.20089E-5  
4576.74415,0.00256,7.09507E-5,1.45374,8.08778E-5  
4575.77982,0.00256,6.38323E-5,1.45372,7.48522E-5  
4574.81548,0.00258,5.61771E-5,1.45371,7.67829E-5  
4573.85114,0.00258,4.24017E-5,1.45375,8.50753E-5  
4572.8868,0.00254,5.68293E-5,1.45374,9.31254E-5  
4571.92247,0.00256,8.91092E-5,1.45371,7.85957E-5  
4570.95813,0.00256,6.39951E-5,1.45375,7.61479E-5  
4569.99379,0.0025,5.00459E-5,1.45374,6.36243E-5  
4569.02946,0.0025,4.91743E-5,1.45366,7.45892E-5  
4568.06512,0.00257,6.78224E-5,1.45366,7.14117E-5  
4567.10078,0.00254,6.33934E-5,1.4537,6.77886E-5  
4566.13644,0.00251,4.2357E-5,1.45361,8.34998E-5  
4565.17211,0.00264,5.35231E-5,1.45356,9.03971E-5  
4564.20777,0.00272,6.61918E-5,1.45369,8.82044E-5  
4563.24343,0.00265,7.38127E-5,1.45378,6.92265E-5  
4562.2791,0.00258,5.09307E-5,1.45375,7.52368E-5

4561.31476,0.00261,5.03814E-5,1.45373,7.08881E-5  
4560.35042,0.00259,5.08431E-5,1.45378,7.48004E-5  
4559.38608,0.00253,6.24365E-5,1.45374,8.62532E-5  
4558.42175,0.00257,6.3755E-5,1.45368,8.81842E-5  
4557.45741,0.00265,5.96786E-5,1.45373,8.15016E-5  
4556.49307,0.0026,4.98864E-5,1.45382,9.14347E-5  
4555.52874,0.00253,6.71808E-5,1.45381,9.46413E-5  
4554.5644,0.00249,8.71815E-5,1.45382,6.84665E-5  
4553.60006,0.00239,6.40022E-5,1.45377,5.98831E-5  
4552.63572,0.00239,6.07417E-5,1.45362,7.05806E-5  
4551.67139,0.00249,7.29915E-5,1.45358,6.88001E-5  
4550.70705,0.00253,5.89852E-5,1.45357,7.13234E-5  
4549.74271,0.00264,5.73932E-5,1.45356,7.24108E-5  
4548.77838,0.00267,5.86024E-5,1.45368,7.01774E-5  
4547.81404,0.00261,6.10663E-5,1.45372,7.64577E-5  
4546.8497,0.0026,6.52762E-5,1.45371,9.13909E-5  
4545.88536,0.0026,9.57904E-5,1.45374,8.96289E-5  
4544.92103,0.00253,1.10563E-4,1.45374,7.39429E-5  
4543.95669,0.00256,8.30791E-5,1.45368,8.34595E-5  
4542.99235,0.0026,8.35112E-5,1.45374,8.37635E-5  
4542.02802,0.00253,8.14298E-5,1.45377,9.65586E-5  
4541.06368,0.00248,6.13233E-5,1.45373,1.00501E-4  
4540.09934,0.00246,5.44685E-5,1.45367,9.25533E-5  
4539.135,0.0025,6.15607E-5,1.45359,9.561E-5  
4538.17067,0.00262,6.89494E-5,1.4536,8.15955E-5  
4537.20633,0.00264,5.87932E-5,1.45372,6.34805E-5  
4536.24199,0.00254,5.84319E-5,1.45374,6.91484E-5  
4535.27766,0.00252,5.63028E-5,1.45367,8.38654E-5  
4534.31332,0.00257,5.77927E-5,1.45366,7.32952E-5  
4533.34898,0.00258,5.28981E-5,1.45368,6.88496E-5  
4532.38464,0.00258,5.31114E-5,1.45368,8.19828E-5  
4531.42031,0.00259,5.31761E-5,1.45372,8.6069E-5  
4530.45597,0.00255,5.92287E-5,1.45374,7.78479E-5  
4529.49163,0.0025,6.04813E-5,1.45372,7.62654E-5  
4528.52729,0.00251,6.10559E-5,1.45367,7.63732E-5  
4527.56296,0.00253,5.68477E-5,1.45366,7.67637E-5  
4526.59862,0.00257,6.25143E-5,1.45365,7.81371E-5  
4525.63428,0.0026,6.68837E-5,1.45368,7.95144E-5  
4524.66995,0.00261,7.67945E-5,1.45373,6.66857E-5  
4523.70561,0.00255,6.26805E-5,1.4538,7.11805E-5  
4522.74127,0.00243,5.18577E-5,1.45377,7.15154E-5  
4521.77693,0.00242,5.74626E-5,1.45365,6.69992E-5  
4520.8126,0.00252,5.49418E-5,1.45362,7.25932E-5  
4519.84826,0.00256,5.17323E-5,1.45369,7.99056E-5  
4518.88392,0.0025,5.86691E-5,1.45375,6.9822E-5  
4517.91959,0.00243,6.39699E-5,1.4537,6.59734E-5  
4516.95525,0.00246,6.49061E-5,1.45365,7.79661E-5  
4515.99091,0.00243,5.84102E-5,1.45367,8.79461E-5  
4515.02657,0.0024,5.16628E-5,1.45359,1.0007E-4  
4514.06224,0.00248,5.95645E-5,1.45353,9.47477E-5  
4513.0979,0.00255,6.39963E-5,1.45358,7.14188E-5  
4512.13356,0.00249,5.03306E-5,1.45364,6.80877E-5  
4511.16923,0.00245,4.98888E-5,1.45356,7.41857E-5  
4510.20489,0.00252,6.45138E-5,1.45352,7.97933E-5  
4509.24055,0.00258,6.63915E-5,1.45355,8.84379E-5  
4508.27621,0.00258,6.58553E-5,1.4536,8.77394E-5  
4507.31188,0.00254,6.2819E-5,1.45359,8.6649E-5  
4506.34754,0.00261,6.17489E-5,1.45354,8.37675E-5  
4505.3832,0.00272,6.3184E-5,1.45366,6.80357E-5  
4504.41887,0.00258,4.73719E-5,1.45384,5.87073E-5  
4503.45453,0.00238,4.46206E-5,1.45379,7.03125E-5  
4502.49019,0.0023,4.92148E-5,1.45363,8.71135E-5  
4501.52585,0.00235,4.38807E-5,1.45347,9.74913E-5  
4500.56152,0.00249,5.38291E-5,1.45338,1.1751E-4  
4499.59718,0.00267,9.53031E-5,1.45342,1.10758E-4



4498.63284,0.00272,1.07072E-4,1.4536,6.70314E-5  
4497.66851,0.00261,6.48571E-5,1.45369,6.43557E-5  
4496.70417,0.00255,5.12007E-5,1.45365,6.29963E-5  
4495.73983,0.00257,5.67311E-5,1.45366,6.98186E-5  
4494.77549,0.0025,5.16301E-5,1.45371,8.6405E-5  
4493.81116,0.00242,6.78573E-5,1.45366,7.18786E-5  
4492.84682,0.00239,6.76477E-5,1.45358,4.91953E-5  
4491.88248,0.00242,5.1748E-5,1.45349,6.49538E-5  
4490.91815,0.00247,4.93031E-5,1.45345,9.21439E-5  
4489.95381,0.00255,5.89018E-5,1.4534,1.25766E-4  
4488.98947,0.00267,1.01639E-4,1.45346,1.33057E-4  
4488.02513,0.00268,1.44416E-4,1.45358,7.44267E-5  
4487.0608,0.00262,9.29485E-5,1.45362,8.27863E-5  
4486.09646,0.00259,7.57157E-5,1.45363,6.82646E-5  
4485.13212,0.00254,7.43678E-5,1.45362,6.39247E-5  
4484.16779,0.00257,7.36179E-5,1.45357,6.39646E-5  
4483.20345,0.0026,6.59159E-5,1.45363,5.85111E-5  
4482.23911,0.00254,5.98819E-5,1.45365,5.73496E-5  
4481.27477,0.00255,7.0214E-5,1.45362,5.62889E-5  
4480.31044,0.00256,6.55464E-5,1.4537,5.58744E-5  
4479.3461,0.00241,4.36876E-5,1.45375,5.95263E-5  
4478.38176,0.0023,4.12545E-5,1.4536,6.57727E-5  
4477.41743,0.00237,3.9885E-5,1.45345,7.63742E-5  
4476.45309,0.00249,4.50503E-5,1.45344,7.8488E-5  
4475.48875,0.00253,5.59026E-5,1.4535,7.97071E-5  
4474.52441,0.00253,5.8811E-5,1.45353,8.16308E-5  
4473.56008,0.00251,5.98999E-5,1.45356,7.82249E-5  
4472.59574,0.00247,7.38047E-5,1.45356,6.62683E-5  
4471.6314,0.00244,7.1069E-5,1.45354,6.51562E-5  
4470.66707,0.00242,5.70812E-5,1.45349,7.67185E-5  
4469.70273,0.00245,4.73771E-5,1.45345,9.35895E-5  
4468.73839,0.00247,3.55375E-5,1.45343,1.05189E-4  
4467.77405,0.00251,5.50529E-5,1.45339,9.69436E-5  
4466.80972,0.00259,6.99066E-5,1.45341,8.86003E-5  
4465.84538,0.00261,7.14187E-5,1.4535,8.58372E-5  
4464.88104,0.00256,7.44427E-5,1.45354,7.49953E-5  
4463.91671,0.00251,6.66343E-5,1.45353,6.41408E-5  
4462.95237,0.00251,5.51971E-5,1.4535,6.41138E-5  
4461.98803,0.00251,5.42362E-5,1.45349,7.2544E-5  
4461.02369,0.00253,6.14638E-5,1.45349,5.99042E-5  
4460.05936,0.00253,5.31457E-5,1.45353,6.68566E-5  
4459.09502,0.00248,6.19109E-5,1.45355,7.1989E-5  
4458.13068,0.00243,5.76436E-5,1.45353,6.07154E-5  
4457.16635,0.0024,4.6078E-5,1.45346,6.22445E-5  
4456.20201,0.00242,5.95109E-5,1.45339,7.02953E-5  
4455.23767,0.0025,6.01653E-5,1.45338,7.21058E-5  
4454.27333,0.00251,4.29257E-5,1.45341,6.97578E-5  
4453.309,0.00253,4.31538E-5,1.45339,7.84521E-5  
4452.34466,0.00257,5.80869E-5,1.45345,8.60702E-5  
4451.38032,0.0025,7.25063E-5,1.45349,8.19121E-5  
4450.41599,0.00248,8.34272E-5,1.45343,7.38869E-5  
4449.45165,0.00252,8.90473E-5,1.45345,7.22116E-5  
4448.48731,0.00246,6.84984E-5,1.45349,7.83902E-5  
4447.52297,0.0024,5.731E-5,1.45342,6.95638E-5  
4446.55864,0.00243,5.14285E-5,1.45337,7.37822E-5  
4445.5943,0.00245,6.69408E-5,1.45334,7.82252E-5  
4444.62996,0.00247,8.36052E-5,1.45331,7.50053E-5  
4443.66562,0.00255,8.36801E-5,1.4533,7.2916E-5  
4442.70129,0.00257,7.06351E-5,1.4534,7.25251E-5  
4441.73695,0.00249,6.31996E-5,1.45341,7.82813E-5  
4440.77261,0.00248,6.73298E-5,1.45336,7.93832E-5  
4439.80828,0.00249,5.51871E-5,1.45336,7.74222E-5  
4438.84394,0.00247,4.60325E-5,1.45337,7.45099E-5  
4437.8796,0.00243,5.16627E-5,1.45335,7.19591E-5  
4436.91526,0.00242,5.31262E-5,1.45328,8.21843E-5

4435.95093,0.00249,5.07869E-5,1.45324,8.39596E-5  
4434.98659,0.00249,4.66167E-5,1.45328,6.89635E-5  
4434.02225,0.00249,3.89097E-5,1.45322,7.42107E-5  
4433.05792,0.00254,4.87918E-5,1.45324,7.34595E-5  
4432.09358,0.00251,5.24588E-5,1.45325,6.60623E-5  
4431.12924,0.00253,5.14464E-5,1.45319,6.63419E-5  
4430.1649,0.0026,4.94945E-5,1.45318,6.77529E-5  
4429.20057,0.00264,7.0224E-5,1.45324,6.884E-5  
4428.23623,0.00263,8.0199E-5,1.4533,7.35003E-5  
4427.27189,0.00257,6.62417E-5,1.45334,8.65269E-5  
4426.30756,0.00249,7.57506E-5,1.4533,9.43504E-5  
4425.34322,0.00249,7.71692E-5,1.45322,9.11102E-5  
4424.37888,0.00254,6.58887E-5,1.45319,7.79658E-5  
4423.41454,0.00255,6.4374E-5,1.45318,8.16971E-5  
4422.45021,0.0026,5.65832E-5,1.45315,9.35065E-5  
4421.48587,0.00265,4.89395E-5,1.45323,8.78536E-5  
4420.52153,0.00257,5.46035E-5,1.45328,8.19463E-5  
4419.5572,0.0025,5.80663E-5,1.4532,8.45301E-5  
4418.59286,0.00256,4.84873E-5,1.45311,8.88576E-5  
4417.62852,0.00263,4.93024E-5,1.45311,9.19634E-5  
4416.66418,0.00268,6.70137E-5,1.45316,9.57334E-5  
4415.69985,0.00265,7.09913E-5,1.45323,8.70893E-5  
4414.73551,0.00256,5.90432E-5,1.45322,6.54551E-5  
4413.77117,0.00252,4.38195E-5,1.45314,6.38403E-5  
4412.80684,0.00257,4.60142E-5,1.45303,7.42804E-5  
4411.8425,0.00269,5.49464E-5,1.45303,7.52687E-5  
4410.87816,0.00272,4.81428E-5,1.45312,8.0508E-5  
4409.91382,0.00265,4.87664E-5,1.45313,8.96747E-5  
4408.94949,0.00265,5.04045E-5,1.45306,1.04243E-4  
4407.98515,0.00273,8.55355E-5,1.45301,1.01359E-4  
4407.02081,0.00282,1.15288E-4,1.45306,8.03839E-5  
4406.05648,0.0028,9.10021E-5,1.45316,7.94389E-5  
4405.09214,0.00275,6.3719E-5,1.45315,7.97745E-5  
4404.1278,0.00277,6.30531E-5,1.45316,7.97805E-5  
4403.16346,0.00273,6.27725E-5,1.45321,7.39464E-5  
4402.19913,0.00262,6.1346E-5,1.45315,7.43953E-5  
4401.23479,0.00265,6.41237E-5,1.45299,1.00628E-4  
4400.27045,0.00283,8.18996E-5,1.45296,1.11192E-4  
4399.30612,0.00292,8.83498E-5,1.4531,8.34101E-5  
4398.34178,0.00285,6.65538E-5,1.4532,6.54855E-5  
4397.37744,0.00277,6.38335E-5,1.45319,6.35318E-5  
4396.4131,0.00275,7.05003E-5,1.45317,6.79853E-5  
4395.44877,0.00272,6.75684E-5,1.45315,6.54186E-5  
4394.48443,0.0027,5.7487E-5,1.45308,7.18437E-5  
4393.52009,0.00279,5.49156E-5,1.45302,8.75864E-5  
4392.55576,0.00283,7.06369E-5,1.45307,8.49613E-5  
4391.59142,0.00284,8.69274E-5,1.45309,8.48373E-5  
4390.62708,0.00286,7.2567E-5,1.45312,9.51643E-5  
4389.66274,0.00283,5.90732E-5,1.45316,9.17303E-5  
4388.69841,0.00277,6.26427E-5,1.45317,8.18865E-5  
4387.73407,0.00271,6.91234E-5,1.45311,7.67461E-5  
4386.76973,0.00272,7.16026E-5,1.45302,8.6735E-5  
4385.8054,0.00278,6.90725E-5,1.45296,1.02081E-4  
4384.84106,0.00287,6.82882E-5,1.45295,1.01999E-4  
4383.87672,0.00295,6.82435E-5,1.45303,8.24067E-5  
4382.91238,0.00286,6.51316E-5,1.45311,7.08226E-5  
4381.94805,0.00279,6.44561E-5,1.45302,7.52898E-5  
4380.98371,0.00285,6.52801E-5,1.45292,8.59191E-5  
4380.01937,0.00298,9.0779E-5,1.45292,8.56079E-5  
4379.05504,0.00303,9.02936E-5,1.45303,8.19537E-5  
4378.0907,0.00298,7.8626E-5,1.4531,6.19725E-5  
4377.12636,0.00291,7.69488E-5,1.4531,6.81699E-5  
4376.16202,0.00287,8.36047E-5,1.45303,7.54218E-5  
4375.19769,0.00292,5.43269E-5,1.45296,7.82009E-5  
4374.23335,0.00299,5.06483E-5,1.45298,6.86679E-5

4373.26901,0.00298,5.69973E-5,1.45299,7.82136E-5  
4372.30468,0.00304,7.11881E-5,1.45297,7.82142E-5  
4371.34034,0.00307,8.28674E-5,1.45303,6.16996E-5  
4370.376,0.00303,7.68856E-5,1.45306,6.79251E-5  
4369.41166,0.003,6.23316E-5,1.45302,9.39417E-5  
4368.44733,0.00305,5.26491E-5,1.45297,1.04015E-4  
4367.48299,0.00312,7.19659E-5,1.45299,8.51141E-5  
4366.51865,0.00315,7.30638E-5,1.45304,8.14004E-5  
4365.55432,0.00314,7.30202E-5,1.4531,8.23297E-5  
4364.58998,0.00308,6.90734E-5,1.45313,7.0962E-5  
4363.62564,0.00302,6.39622E-5,1.45308,7.91344E-5  
4362.6613,0.00308,7.86255E-5,1.45301,9.95071E-5  
4361.69697,0.00311,9.61558E-5,1.45307,8.20557E-5  
4360.73263,0.00306,9.47783E-5,1.45306,6.90567E-5  
4359.76829,0.00307,9.27903E-5,1.45301,7.91363E-5  
4358.80396,0.00308,9.131E-5,1.45298,8.65616E-5  
4357.83962,0.00313,7.27017E-5,1.4529,1.10526E-4  
4356.87528,0.00329,7.07762E-5,1.45289,1.04091E-4  
4355.91094,0.00335,7.77131E-5,1.45305,6.85855E-5  
4354.94661,0.00326,6.88946E-5,1.45313,6.72477E-5  
4353.98227,0.00318,6.50891E-5,1.45308,6.57841E-5  
4353.01793,0.0032,7.78257E-5,1.45298,7.24958E-5  
4352.05359,0.00331,9.74154E-5,1.45295,8.90063E-5  
4351.08926,0.00341,5.80401E-5,1.45301,1.05187E-4  
4350.12492,0.00344,6.36405E-5,1.45311,7.51214E-5  
4349.16058,0.0034,6.51077E-5,1.45319,8.01007E-5  
4348.19625,0.00334,6.68828E-5,1.45322,9.13543E-5  
4347.23191,0.00327,7.2998E-5,1.45319,8.75711E-5  
4346.26757,0.00324,7.53596E-5,1.4531,8.87734E-5  
4345.30323,0.00332,8.77213E-5,1.45299,9.65482E-5  
4344.3389,0.00347,9.76303E-5,1.453,8.94618E-5  
4343.37456,0.00355,8.35309E-5,1.45308,7.76416E-5  
4342.41022,0.00357,7.62511E-5,1.45315,7.46675E-5  
4341.44589,0.00359,7.96017E-5,1.45321,7.5811E-5  
4340.48155,0.00357,8.38246E-5,1.45327,7.50389E-5  
4339.51721,0.00356,9.85306E-5,1.45325,8.22566E-5  
4338.55287,0.00365,1.16654E-4,1.45327,8.47489E-5  
4337.58854,0.0037,9.27544E-5,1.45339,9.2831E-5  
4336.6242,0.00363,7.11755E-5,1.45349,7.70565E-5  
4335.65986,0.00357,8.65211E-5,1.45348,8.24555E-5  
4334.69553,0.00359,9.48803E-5,1.45348,1.10734E-4  
4333.73119,0.00362,7.37501E-5,1.45352,1.14057E-4  
4332.76685,0.00364,7.04707E-5,1.45361,9.45781E-5  
4331.80251,0.00359,6.59699E-5,1.45369,9.25902E-5  
4330.83818,0.00352,6.43919E-5,1.45372,8.80259E-5  
4329.87384,0.0035,8.05785E-5,1.45372,7.83871E-5  
4328.9095,0.00348,9.54033E-5,1.45374,8.50712E-5  
4327.94517,0.00349,8.26846E-5,1.45375,1.01522E-4  
4326.98083,0.0035,8.14643E-5,1.45384,8.67663E-5  
4326.01649,0.00344,6.97946E-5,1.45396,8.8792E-5  
4325.05215,0.00326,5.81056E-5,1.45401,9.51718E-5  
4324.08782,0.00316,5.64687E-5,1.45392,9.03314E-5  
4323.12348,0.00315,5.27927E-5,1.45389,7.96406E-5  
4322.15914,0.00308,4.98053E-5,1.45387,7.36492E-5  
4321.19481,0.00305,5.76207E-5,1.4538,8.53344E-5  
4320.23047,0.00305,5.21411E-5,1.45375,8.89607E-5  
4319.26613,0.00308,6.28833E-5,1.45372,8.2331E-5  
4318.30179,0.00313,8.36199E-5,1.45376,7.06127E-5  
4317.33746,0.00307,7.3889E-5,1.45384,6.40322E-5  
4316.37312,0.00297,6.76626E-5,1.45381,5.75229E-5  
4315.40878,0.00296,5.83364E-5,1.45374,6.96258E-5  
4314.44445,0.00295,5.79419E-5,1.45374,7.18825E-5  
4313.48011,0.0029,6.54706E-5,1.4537,7.40977E-5  
4312.51577,0.00292,6.08785E-5,1.45363,9.06231E-5  
4311.55143,0.00296,5.0481E-5,1.45364,9.98608E-5

4310.5871,0.00292,5.72329E-5,1.45364,8.75109E-5  
4309.62276,0.00292,6.52013E-5,1.45358,8.04822E-5  
4308.65842,0.00298,8.34838E-5,1.45355,7.89691E-5  
4307.69409,0.00302,9.96006E-5,1.45359,7.44984E-5  
4306.72975,0.003,7.93585E-5,1.45363,9.63125E-5  
4305.76541,0.00298,5.55708E-5,1.45362,1.03001E-4  
4304.80107,0.003,6.01294E-5,1.45362,8.75292E-5  
4303.83674,0.00296,5.72031E-5,1.45367,7.4881E-5  
4302.8724,0.0029,5.03095E-5,1.45362,7.1374E-5  
4301.90806,0.00294,5.08844E-5,1.45358,7.36211E-5  
4300.94373,0.00296,6.05383E-5,1.45362,7.07406E-5  
4299.97939,0.00291,6.05093E-5,1.45361,7.53406E-5  
4299.01505,0.00294,6.39054E-5,1.45357,8.06503E-5  
4298.05071,0.00298,7.74863E-5,1.45365,7.2215E-5  
4297.08638,0.00286,7.55201E-5,1.45371,6.71257E-5  
4296.12204,0.00274,6.09283E-5,1.4536,7.18116E-5  
4295.1577,0.00281,5.22747E-5,1.45348,7.77675E-5  
4294.19337,0.00289,4.3763E-5,1.45351,8.51968E-5  
4293.22903,0.00287,4.5676E-5,1.45355,7.5869E-5  
4292.26469,0.00282,4.74471E-5,1.45357,7.12021E-5  
4291.30035,0.00275,4.93096E-5,1.45351,8.54517E-5  
4290.33602,0.00277,4.67044E-5,1.45342,9.86997E-5  
4289.37168,0.00283,4.87916E-5,1.45339,9.30157E-5  
4288.40734,0.00285,5.39758E-5,1.4534,8.19782E-5  
4287.44301,0.00286,5.27079E-5,1.45338,7.107E-5  
4286.47867,0.00288,5.4481E-5,1.45337,6.89868E-5  
4285.51433,0.00291,5.17388E-5,1.45335,7.98044E-5  
4284.54999,0.00296,5.03395E-5,1.45337,7.85111E-5  
4283.58566,0.00299,6.53844E-5,1.45343,7.21071E-5  
4282.62132,0.00294,7.22506E-5,1.4535,7.11819E-5  
4281.65698,0.00283,6.60919E-5,1.4535,8.11938E-5  
4280.69265,0.00276,6.26212E-5,1.45342,8.54159E-5  
4279.72831,0.00276,6.49579E-5,1.45331,7.81407E-5  
4278.76397,0.00283,5.61753E-5,1.45325,7.75852E-5  
4277.79963,0.00288,4.77288E-5,1.45324,7.6741E-5  
4276.8353,0.00288,5.31277E-5,1.45322,8.36655E-5  
4275.87096,0.00293,5.50602E-5,1.45317,9.8559E-5  
4274.90662,0.00299,5.8226E-5,1.45316,1.05344E-4  
4273.94229,0.00305,7.94904E-5,1.45315,1.01536E-4  
4272.97795,0.00314,9.87902E-5,1.45319,8.72391E-5  
4272.01361,0.00314,7.44459E-5,1.4533,8.85909E-5  
4271.04927,0.00305,5.83343E-5,1.45327,8.06204E-5  
4270.08494,0.00313,6.69469E-5,1.45319,8.00735E-5  
4269.1206,0.00323,7.72709E-5,1.45328,7.7748E-5  
4268.15626,0.00316,6.31076E-5,1.45335,8.98085E-5  
4267.19193,0.00315,7.05373E-5,1.4533,8.8134E-5  
4266.22759,0.0032,6.01603E-5,1.45333,8.72478E-5  
4265.26325,0.00315,5.34212E-5,1.45336,8.48904E-5  
4264.29891,0.00316,6.36699E-5,1.45327,9.28354E-5  
4263.33458,0.00328,8.4314E-5,1.45328,8.41804E-5  
4262.37024,0.00331,8.119E-5,1.45335,7.59775E-5  
4261.4059,0.00332,7.01915E-5,1.45338,8.48599E-5  
4260.44156,0.00336,6.32467E-5,1.45343,8.27853E-5  
4259.47723,0.00337,6.43771E-5,1.45347,7.73874E-5  
4258.51289,0.00344,7.71642E-5,1.45353,8.52465E-5  
4257.54855,0.00343,8.09833E-5,1.45373,7.6073E-5  
4256.58422,0.00321,7.46777E-5,1.45381,7.49218E-5  
4255.61988,0.00311,8.74004E-5,1.4537,7.89152E-5  
4254.65554,0.00315,8.13625E-5,1.45365,9.17911E-5  
4253.6912,0.00315,7.13745E-5,1.45369,9.02365E-5  
4252.72687,0.00311,6.0607E-5,1.45371,8.06914E-5  
4251.76253,0.00307,6.23605E-5,1.4537,8.64794E-5  
4250.79819,0.00306,5.74375E-5,1.45366,1.13733E-4  
4249.83386,0.0031,7.51859E-5,1.45367,1.05756E-4  
4248.86952,0.00308,7.89111E-5,1.45375,7.05693E-5

4247.90518,0.00298,7.08593E-5,1.45377,6.99406E-5  
4246.94084,0.00292,6.34859E-5,1.45372,8.74405E-5  
4245.97651,0.00289,5.6343E-5,1.45366,9.00281E-5  
4245.01217,0.00293,6.05039E-5,1.4536,8.31562E-5  
4244.04783,0.00296,6.43065E-5,1.45363,8.64598E-5  
4243.0835,0.00294,7.15016E-5,1.45364,7.7771E-5  
4242.11916,0.00294,5.57649E-5,1.45363,8.76383E-5  
4241.15482,0.00296,5.65059E-5,1.45369,8.58858E-5  
4240.19048,0.00285,5.36451E-5,1.45377,6.89623E-5  
4239.22615,0.00271,6.32146E-5,1.45367,6.41055E-5  
4238.26181,0.00271,7.14009E-5,1.45354,7.90435E-5  
4237.29747,0.00274,6.58928E-5,1.45348,8.88806E-5  
4236.33314,0.00277,5.9061E-5,1.45343,9.82573E-5  
4235.3688,0.00283,6.10068E-5,1.45339,1.09999E-4  
4234.40446,0.00289,7.07184E-5,1.45337,1.06267E-4  
4233.44012,0.00295,6.63035E-5,1.45339,9.87182E-5  
4232.47579,0.00299,6.20904E-5,1.45345,9.36089E-5  
4231.51145,0.00298,6.96951E-5,1.45351,8.31944E-5  
4230.54711,0.00292,6.9755E-5,1.45354,8.12373E-5  
4229.58278,0.00289,6.36799E-5,1.45351,8.76962E-5  
4228.61844,0.00287,7.45927E-5,1.45352,7.56156E-5  
4227.6541,0.00282,9.10772E-5,1.45348,7.07761E-5  
4226.68976,0.00281,8.95583E-5,1.45341,9.67504E-5  
4225.72543,0.00286,5.96013E-5,1.45334,1.24712E-4  
4224.76109,0.00296,5.72298E-5,1.45332,1.135E-4  
4223.79675,0.00303,5.64892E-5,1.45338,9.66383E-5  
4222.83242,0.00304,6.19054E-5,1.45346,9.08619E-5  
4221.86808,0.003,7.01461E-5,1.45352,8.02178E-5  
4220.90374,0.00293,6.46262E-5,1.45353,8.13755E-5  
4219.9394,0.00289,6.79635E-5,1.45348,7.89399E-5  
4218.97507,0.00291,7.02175E-5,1.45344,7.54973E-5  
4218.01073,0.00293,6.28741E-5,1.45343,7.67046E-5  
4217.04639,0.00297,6.0323E-5,1.45345,7.2169E-5  
4216.08206,0.00296,7.25684E-5,1.45348,7.04459E-5  
4215.11772,0.00294,8.87778E-5,1.4535,6.41519E-5  
4214.15338,0.0029,7.49764E-5,1.45351,7.42048E-5  
4213.18904,0.00287,5.38532E-5,1.45345,8.5334E-5  
4212.22471,0.00293,4.41036E-5,1.45343,7.94724E-5  
4211.26037,0.00292,5.59173E-5,1.45349,7.15264E-5  
4210.29603,0.00286,6.99949E-5,1.45345,8.53745E-5  
4209.3317,0.00288,5.04057E-5,1.45343,9.98374E-5  
4208.36736,0.00285,4.27729E-5,1.45341,9.87373E-5  
4207.40302,0.00287,5.05557E-5,1.4533,1.11493E-4  
4206.43868,0.00304,6.82695E-5,1.45328,1.0774E-4  
4205.47435,0.00313,7.63225E-5,1.45344,7.98473E-5  
4204.51001,0.00303,6.60358E-5,1.45358,7.88562E-5  
4203.54567,0.00289,7.60834E-5,1.45356,8.31082E-5  
4202.58134,0.00287,7.03829E-5,1.45346,9.1245E-5  
4201.617,0.0029,6.11565E-5,1.45344,9.37052E-5  
4200.65266,0.00291,6.40442E-5,1.45341,9.6618E-5  
4199.68832,0.00295,7.541E-5,1.4534,8.9752E-5  
4198.72399,0.00297,7.90177E-5,1.45342,8.22632E-5  
4197.75965,0.00302,8.73866E-5,1.45344,8.92372E-5  
4196.79531,0.00302,9.01864E-5,1.45351,9.20938E-5  
4195.83098,0.00295,7.80006E-5,1.45353,9.17646E-5  
4194.86664,0.00296,6.67055E-5,1.45352,8.06664E-5  
4193.9023,0.00293,6.35226E-5,1.45356,6.71768E-5  
4192.93796,0.00287,6.07536E-5,1.45354,7.31453E-5  
4191.97363,0.00287,6.26557E-5,1.45349,8.30676E-5  
4191.00929,0.00288,6.71745E-5,1.45351,8.62748E-5  
4190.04495,0.00284,5.59726E-5,1.4535,8.94105E-5  
4189.08062,0.00286,4.44231E-5,1.45347,8.68941E-5  
4188.11628,0.00284,4.48799E-5,1.45349,8.27023E-5  
4187.15194,0.00281,4.81509E-5,1.45341,8.9185E-5  
4186.1876,0.00291,4.87996E-5,1.45336,9.20008E-5

4185.22327,0.00299,5.3587E-5,1.45345,8.39174E-5  
4184.25893,0.00294,6.10026E-5,1.45357,6.79339E-5  
4183.29459,0.0028,5.06381E-5,1.45358,6.5472E-5  
4182.33026,0.00275,4.99994E-5,1.45349,7.42135E-5  
4181.36592,0.00276,5.40423E-5,1.45344,7.76998E-5  
4180.40158,0.00276,5.30218E-5,1.45338,8.40523E-5  
4179.43724,0.00285,5.02258E-5,1.45335,8.6816E-5  
4178.47291,0.00285,6.17022E-5,1.45341,7.68248E-5  
4177.50857,0.00283,6.19772E-5,1.45336,8.79636E-5  
4176.54423,0.00292,6.06581E-5,1.45336,8.6046E-5  
4175.5799,0.00292,5.66733E-5,1.45345,7.02173E-5  
4174.61556,0.00286,5.64202E-5,1.45346,7.43949E-5  
4173.65122,0.00284,5.66551E-5,1.45344,8.74686E-5  
4172.68688,0.00281,5.43783E-5,1.45343,9.51932E-5  
4171.72255,0.00281,5.83699E-5,1.45338,1.01327E-4  
4170.75821,0.00284,5.53709E-5,1.45337,1.10493E-4  
4169.79387,0.00285,6.31191E-5,1.45338,9.13191E-5  
4168.82953,0.00284,4.89319E-5,1.45334,8.3184E-5  
4167.8652,0.00294,4.58271E-5,1.45327,8.97847E-5  
4166.90086,0.00304,5.70198E-5,1.45345,7.43763E-5  
4165.93652,0.00286,5.00893E-5,1.45358,8.08498E-5  
4164.97219,0.00272,5.15675E-5,1.45343,9.68841E-5  
4164.00785,0.00281,5.44613E-5,1.45331,9.637E-5  
4163.04351,0.0029,6.16063E-5,1.45335,9.18344E-5  
4162.07917,0.00291,7.44079E-5,1.45336,9.97643E-5  
4161.11484,0.00296,6.96372E-5,1.4534,1.04816E-4  
4160.1505,0.00293,5.61796E-5,1.4535,8.96882E-5  
4159.18616,0.00283,5.36434E-5,1.45349,7.93841E-5  
4158.22183,0.00284,5.18103E-5,1.45344,7.85426E-5  
4157.25749,0.00284,5.53054E-5,1.45345,8.09301E-5  
4156.29315,0.00284,5.59628E-5,1.45344,8.23499E-5  
4155.32881,0.00285,5.48678E-5,1.45347,6.73699E-5  
4154.36448,0.00278,4.87356E-5,1.45349,6.19016E-5  
4153.40014,0.00273,6.04335E-5,1.45342,7.31709E-5  
4152.4358,0.00279,5.04852E-5,1.45336,9.88944E-5  
4151.47147,0.00284,5.26228E-5,1.4534,9.42099E-5  
4150.50713,0.00282,5.39679E-5,1.45344,8.31396E-5  
4149.54279,0.00278,5.77623E-5,1.45344,7.62912E-5  
4148.57845,0.00274,5.67998E-5,1.45339,7.12271E-5  
4147.61412,0.00278,5.33422E-5,1.45334,7.84062E-5  
4146.64978,0.00283,5.00485E-5,1.45335,9.27974E-5  
4145.68544,0.00284,4.8687E-5,1.45339,9.71491E-5  
4144.72111,0.00283,4.98535E-5,1.4534,9.40932E-5  
4143.75677,0.00284,5.40874E-5,1.4534,9.57996E-5  
4142.79243,0.00286,6.72649E-5,1.45343,7.92365E-5  
4141.82809,0.00283,6.31663E-5,1.45349,6.6025E-5  
4140.86376,0.00277,5.06151E-5,1.45353,6.91976E-5  
4139.89942,0.00265,4.40445E-5,1.45352,7.18291E-5  
4138.93508,0.00259,5.4713E-5,1.45339,7.03481E-5  
4137.97075,0.00266,5.501E-5,1.45329,7.82287E-5  
4137.00641,0.00271,5.40565E-5,1.45328,8.87476E-5  
4136.04207,0.00277,6.43815E-5,1.45325,1.04455E-4  
4135.07773,0.00287,7.26563E-5,1.4533,1.04876E-4  
4134.1134,0.00284,7.19803E-5,1.45344,8.23988E-5  
4133.14906,0.00271,6.91135E-5,1.45343,7.11349E-5  
4132.18472,0.00272,6.62939E-5,1.45333,8.53774E-5  
4131.22039,0.00277,6.04677E-5,1.45334,1.00361E-4  
4130.25605,0.00277,5.21855E-5,1.45337,1.0604E-4  
4129.29171,0.00278,5.38343E-5,1.4534,9.11769E-5  
4128.32737,0.00269,5.42005E-5,1.45344,8.29294E-5  
4127.36304,0.00263,5.15984E-5,1.45334,8.5316E-5  
4126.3987,0.00271,5.19058E-5,1.45329,7.83179E-5  
4125.43436,0.00272,5.35006E-5,1.45336,7.50962E-5  
4124.47003,0.00263,5.19354E-5,1.4533,8.49584E-5  
4123.50569,0.00271,5.36631E-5,1.45319,9.32676E-5

4122.54135,0.00282,4.76585E-5,1.45325,1.0337E-4  
4121.57701,0.00283,4.81237E-5,1.45331,1.10017E-4  
4120.61268,0.00282,5.65466E-5,1.45338,1.03056E-4  
4119.64834,0.00275,4.82367E-5,1.45342,9.42681E-5  
4118.684,0.00269,5.93044E-5,1.4534,8.28659E-5  
4117.71967,0.00264,5.01685E-5,1.45335,8.4209E-5  
4116.75533,0.00268,4.6901E-5,1.45325,8.58969E-5  
4115.79099,0.00278,4.5365E-5,1.4533,8.53573E-5  
4114.82665,0.00273,3.89737E-5,1.45339,8.58955E-5  
4113.86232,0.00266,4.07713E-5,1.45336,9.5333E-5  
4112.89798,0.00265,4.27661E-5,1.45333,1.04009E-4  
4111.93364,0.00265,3.87153E-5,1.45329,1.03779E-4  
4110.96931,0.00267,5.0531E-5,1.45327,9.85369E-5  
4110.00497,0.00269,5.97851E-5,1.45328,8.13446E-5  
4109.04063,0.00268,6.19894E-5,1.45328,7.73104E-5  
4108.07629,0.00266,6.31729E-5,1.45326,1.01216E-4  
4107.11196,0.00268,4.9354E-5,1.45322,1.2215E-4  
4106.14762,0.00276,5.89343E-5,1.45323,1.14341E-4  
4105.18328,0.00275,6.10478E-5,1.45331,1.01871E-4  
4104.21895,0.0027,5.20068E-5,1.4533,9.87083E-5  
4103.25461,0.00272,5.27555E-5,1.45329,9.13221E-5  
4102.29027,0.00272,5.13015E-5,1.45333,7.70836E-5  
4101.32593,0.00266,4.11646E-5,1.45335,7.38475E-5  
4100.3616,0.00264,4.73433E-5,1.45331,8.04857E-5  
4099.39726,0.00265,4.59242E-5,1.4533,8.6141E-5  
4098.43292,0.00263,4.51902E-5,1.4533,8.69713E-5  
4097.46859,0.00261,5.02074E-5,1.45328,9.34655E-5  
4096.50425,0.00262,5.50634E-5,1.45325,8.4543E-5  
4095.53991,0.00263,5.39839E-5,1.45325,8.11023E-5  
4094.57557,0.00262,5.53586E-5,1.45325,8.49092E-5  
4093.61124,0.00263,5.09331E-5,1.45322,8.6746E-5  
4092.6469,0.00268,5.00452E-5,1.45321,8.65811E-5  
4091.68256,0.0027,5.4769E-5,1.45328,7.75986E-5  
4090.71823,0.00265,5.646E-5,1.45333,6.97248E-5  
4089.75389,0.00259,5.56357E-5,1.45331,7.28457E-5  
4088.78955,0.00258,5.28323E-5,1.45327,8.2573E-5  
4087.82521,0.00258,4.99319E-5,1.45326,8.52568E-5  
4086.86088,0.00256,4.67966E-5,1.45326,8.32694E-5  
4085.89654,0.00254,4.24086E-5,1.45325,8.84794E-5  
4084.9322,0.00252,4.52403E-5,1.45322,9.0442E-5  
4083.96786,0.00253,4.83772E-5,1.45318,9.80841E-5  
4083.00353,0.00254,4.69006E-5,1.45318,9.63264E-5  
4082.03919,0.0025,4.83204E-5,1.45317,8.30721E-5  
4081.07485,0.00251,4.48891E-5,1.45307,9.57079E-5  
4080.11052,0.00262,4.022E-5,1.45305,1.05701E-4  
4079.14618,0.00266,4.10499E-5,1.45314,9.88468E-5  
4078.18184,0.0026,3.9752E-5,1.45317,9.78692E-5  
4077.2175,0.00261,4.6854E-5,1.45315,9.00483E-5  
4076.25317,0.00259,5.20164E-5,1.4532,8.34375E-5  
4075.28883,0.0025,5.49853E-5,1.45317,8.77377E-5  
4074.32449,0.00249,4.93823E-5,1.45307,9.63373E-5  
4073.36016,0.00257,4.08227E-5,1.45301,1.00801E-4  
4072.39582,0.00265,4.20993E-5,1.45302,9.87817E-5  
4071.43148,0.0027,4.91105E-5,1.4531,9.37993E-5  
4070.46714,0.00265,5.09098E-5,1.45318,9.12437E-5  
4069.50281,0.00256,4.75194E-5,1.45315,8.90404E-5  
4068.53847,0.00255,4.26788E-5,1.45308,9.1882E-5  
4067.57413,0.00261,3.74538E-5,1.45306,9.88298E-5  
4066.6098,0.00262,4.3188E-5,1.45309,9.84379E-5  
4065.64546,0.00262,4.55749E-5,1.45308,9.89056E-5  
4064.68112,0.00265,5.38267E-5,1.45309,9.95123E-5  
4063.71678,0.00265,6.24166E-5,1.45313,9.29664E-5  
4062.75245,0.00262,5.04036E-5,1.45315,8.61324E-5  
4061.78811,0.00258,4.18908E-5,1.45315,8.33207E-5  
4060.82377,0.00255,4.46908E-5,1.45313,8.72244E-5

4059.85944,0.00254,5.30435E-5,1.4531,9.34279E-5  
4058.8951,0.00255,6.40477E-5,1.45306,1.0251E-4  
4057.93076,0.00259,7.55086E-5,1.45305,9.65636E-5  
4056.96642,0.00259,7.31774E-5,1.45309,8.69785E-5  
4056.00209,0.00257,5.65329E-5,1.45307,9.33282E-5  
4055.03775,0.00259,5.4132E-5,1.45308,8.76556E-5  
4054.07341,0.00256,4.49811E-5,1.4531,8.50904E-5  
4053.10908,0.00251,4.4041E-5,1.45307,8.61857E-5  
4052.14474,0.00252,4.92229E-5,1.453,8.35025E-5  
4051.1804,0.00257,4.71323E-5,1.45297,8.54639E-5  
4050.21606,0.00262,4.33593E-5,1.45297,8.50899E-5  
4049.25173,0.00267,4.36142E-5,1.45301,8.82021E-5  
4048.28739,0.00267,5.27413E-5,1.45307,9.54397E-5  
4047.32305,0.00262,6.0752E-5,1.45311,9.46897E-5  
4046.35872,0.00257,5.97032E-5,1.45309,9.55044E-5  
4045.39438,0.00258,5.83625E-5,1.45304,1.034E-4  
4044.43004,0.00261,6.94105E-5,1.45303,9.26367E-5  
4043.4657,0.00265,6.89353E-5,1.45305,7.47206E-5  
4042.50137,0.00267,5.51922E-5,1.45313,6.93286E-5  
4041.53703,0.00257,4.30083E-5,1.45318,7.32004E-5  
4040.57269,0.00253,4.31948E-5,1.45313,8.0031E-5  
4039.60836,0.00253,5.40734E-5,1.45315,7.81124E-5  
4038.64402,0.00246,6.35822E-5,1.45315,7.2697E-5  
4037.67968,0.00241,5.77617E-5,1.45308,8.06604E-5  
4036.71534,0.00244,4.44573E-5,1.453,9.08333E-5  
4035.75101,0.00252,4.27421E-5,1.45302,8.02078E-5  
4034.78667,0.00248,3.61123E-5,1.45308,7.76907E-5  
4033.82233,0.00241,4.24428E-5,1.45305,8.08002E-5  
4032.858,0.00241,4.66863E-5,1.45298,7.41687E-5  
4031.89366,0.00241,5.11028E-5,1.45294,8.03785E-5  
4030.92932,0.00247,5.27917E-5,1.45289,9.33027E-5  
4029.96498,0.00253,4.99158E-5,1.45294,8.88749E-5  
4029.00065,0.00247,4.24875E-5,1.45298,8.23614E-5  
4028.03631,0.00243,4.48665E-5,1.45289,8.92931E-5  
4027.07197,0.00255,4.90572E-5,1.45284,9.76197E-5  
4026.10764,0.00261,5.37743E-5,1.45295,8.99744E-5  
4025.1433,0.00251,4.38102E-5,1.45299,8.59259E-5  
4024.17896,0.0025,4.66511E-5,1.45292,8.77369E-5  
4023.21462,0.00256,5.35655E-5,1.45291,8.82018E-5  
4022.25029,0.00257,5.21154E-5,1.45294,8.83545E-5  
4021.28595,0.0026,4.76684E-5,1.45297,8.68177E-5  
4020.32161,0.00257,4.34771E-5,1.45305,8.24078E-5  
4019.35728,0.00249,4.25846E-5,1.45306,7.92443E-5  
4018.39294,0.00244,4.60855E-5,1.45302,8.20984E-5  
4017.4286,0.00242,5.41674E-5,1.45298,8.27148E-5  
4016.46426,0.00242,5.22001E-5,1.45292,9.14767E-5  
4015.49993,0.00247,5.08166E-5,1.4529,9.38788E-5  
4014.53559,0.0025,5.03003E-5,1.45293,8.62064E-5  
4013.57125,0.0025,4.63227E-5,1.45295,7.85736E-5  
4012.60692,0.00249,4.86271E-5,1.45299,7.32664E-5  
4011.64258,0.00243,5.21923E-5,1.45299,7.59073E-5  
4010.67824,0.00241,4.93539E-5,1.45297,8.61359E-5  
4009.7139,0.00239,4.46088E-5,1.45296,8.97633E-5  
4008.74957,0.00234,3.98728E-5,1.45292,9.87453E-5  
4007.78523,0.00236,3.79346E-5,1.45285,1.13142E-4  
4006.82089,0.00242,5.10311E-5,1.45283,1.15289E-4  
4005.85656,0.00245,6.22733E-5,1.45284,9.85523E-5  
4004.89222,0.00246,5.17038E-5,1.45287,8.23849E-5  
4003.92788,0.00245,4.32968E-5,1.4529,7.45383E-5  
4002.96354,0.00241,4.46532E-5,1.4529,7.46065E-5  
4001.99921,0.00241,4.85679E-5,1.45287,7.57983E-5  
4001.03487,0.00243,4.60917E-5,1.45288,8.34347E-5  
4000.07053,0.00239,4.29083E-5,1.45291,8.86788E-5  
3999.1062,0.00236,4.85736E-5,1.45285,9.06665E-5  
3998.14186,0.00242,4.27247E-5,1.45283,9.76603E-5



3997.17752,0.00241,3.72412E-5,1.45289,9.97803E-5  
3996.21318,0.00237,4.13921E-5,1.45288,9.40323E-5  
3995.24885,0.00236,4.98595E-5,1.45287,8.80131E-5  
3994.28451,0.00235,5.08039E-5,1.45287,8.61585E-5  
3993.32017,0.0023,4.46345E-5,1.45287,8.68276E-5  
3992.35583,0.00225,4.9624E-5,1.45281,8.65475E-5  
3991.3915,0.00228,3.93645E-5,1.45272,1.00976E-4  
3990.42716,0.00235,3.9067E-5,1.45271,1.01216E-4  
3989.46282,0.00237,4.12958E-5,1.45272,9.44529E-5  
3988.49849,0.0024,4.86538E-5,1.45272,9.0096E-5  
3987.53415,0.00242,5.46074E-5,1.45278,8.01674E-5  
3986.56981,0.00236,5.0311E-5,1.45282,7.67304E-5  
3985.60547,0.00232,4.31641E-5,1.45278,8.26535E-5  
3984.64114,0.00233,3.74168E-5,1.45274,8.19327E-5  
3983.6768,0.00233,3.802E-5,1.45273,8.34871E-5  
3982.71246,0.00238,4.66206E-5,1.45272,8.86053E-5  
3981.74813,0.00237,5.34014E-5,1.45281,8.31443E-5  
3980.78379,0.00226,5.62889E-5,1.4528,8.31292E-5  
3979.81945,0.00223,5.3588E-5,1.45271,9.37641E-5  
3978.85511,0.00227,4.92243E-5,1.45268,9.71255E-5  
3977.89078,0.00226,4.65247E-5,1.45266,9.85153E-5  
3976.92644,0.00228,4.63737E-5,1.45261,9.53297E-5  
3975.9621,0.00231,5.11873E-5,1.45262,8.71109E-5  
3974.99777,0.00231,4.59379E-5,1.4526,9.31985E-5  
3974.03343,0.00236,4.26899E-5,1.45258,1.03053E-4  
3973.06909,0.00238,4.52792E-5,1.45263,9.4397E-5  
3972.10475,0.00235,4.09507E-5,1.45264,8.88157E-5  
3971.14042,0.00234,4.13992E-5,1.45262,8.82924E-5  
3970.17608,0.00234,4.18344E-5,1.45262,8.41298E-5  
3969.21174,0.00235,3.97992E-5,1.45261,8.71955E-5  
3968.24741,0.00234,4.54824E-5,1.45264,9.9871E-5  
3967.28307,0.0023,5.46181E-5,1.45261,1.14742E-4  
3966.31873,0.00232,5.34246E-5,1.45254,1.23833E-4  
3965.35439,0.00241,5.53715E-5,1.45253,1.07237E-4  
3964.39006,0.00246,4.60002E-5,1.45263,9.25309E-5  
3963.42572,0.00237,4.96952E-5,1.45273,9.22088E-5  
3962.46138,0.00225,5.5209E-5,1.45268,1.0486E-4  
3961.49705,0.00226,5.43053E-5,1.45258,1.10067E-4  
3960.53271,0.0023,5.75482E-5,1.45259,9.12375E-5  
3959.56837,0.00227,4.65027E-5,1.45257,8.60952E-5  
3958.60403,0.00229,3.70038E-5,1.45252,1.02835E-4  
3957.6397,0.00233,4.49733E-5,1.45254,1.01081E-4  
3956.67536,0.00231,5.13602E-5,1.45258,8.69833E-5  
3955.71102,0.00226,4.97234E-5,1.45255,8.0451E-5  
3954.74669,0.00228,5.03442E-5,1.45249,8.72313E-5  
3953.78235,0.00234,5.61813E-5,1.45247,1.02035E-4  
3952.81801,0.00236,5.28126E-5,1.45251,1.10481E-4  
3951.85367,0.00236,5.16873E-5,1.45255,1.03765E-4  
3950.88934,0.00231,5.17895E-5,1.4526,8.86566E-5  
3949.925,0.00222,4.40522E-5,1.45254,8.94017E-5  
3948.96066,0.00227,3.58229E-5,1.45244,1.00182E-4  
3947.99633,0.00234,4.14875E-5,1.45248,9.36125E-5  
3947.03199,0.0023,5.70685E-5,1.4525,9.96931E-5  
3946.06765,0.00233,6.35119E-5,1.45249,1.09622E-4  
3945.10331,0.00231,5.06445E-5,1.45254,1.06465E-4  
3944.13898,0.00225,4.96803E-5,1.45252,1.00812E-4  
3943.17464,0.00222,5.54682E-5,1.45249,1.05763E-4  
3942.2103,0.00222,4.4064E-5,1.45239,1.26251E-4  
3941.24597,0.00233,6.00308E-5,1.45236,1.17807E-4  
3940.28163,0.00237,6.08517E-5,1.45247,8.61278E-5  
3939.31729,0.0023,4.30287E-5,1.45251,8.50086E-5  
3938.35295,0.00225,4.37241E-5,1.45247,9.20858E-5  
3937.38862,0.00225,4.27417E-5,1.45242,9.96803E-5  
3936.42428,0.00231,4.58923E-5,1.45242,1.06514E-4  
3935.45994,0.0023,5.18377E-5,1.45251,9.69025E-5

3934.49561,0.00219,4.68479E-5,1.4525,8.32075E-5  
3933.53127,0.00215,4.06957E-5,1.4524,8.8869E-5  
3932.56693,0.0022,4.5387E-5,1.45234,9.501E-5  
3931.60259,0.00225,4.85211E-5,1.45234,9.89366E-5  
3930.63826,0.00227,4.66878E-5,1.45235,9.28091E-5  
3929.67392,0.00226,4.18138E-5,1.45238,8.90988E-5  
3928.70958,0.00223,3.98444E-5,1.45237,9.14452E-5  
3927.74525,0.00222,4.1861E-5,1.45233,8.94736E-5  
3926.78091,0.00226,4.36587E-5,1.45231,8.91853E-5  
3925.81657,0.00228,5.06974E-5,1.45235,8.91438E-5  
3924.85223,0.00223,5.24376E-5,1.45239,9.08356E-5  
3923.8879,0.00215,5.55828E-5,1.45234,9.73869E-5  
3922.92356,0.00218,5.67959E-5,1.45223,1.08006E-4  
3921.95922,0.00228,4.27256E-5,1.45222,1.12449E-4  
3920.99489,0.0023,4.20541E-5,1.45228,1.05485E-4  
3920.03055,0.00226,5.51417E-5,1.45231,1.07641E-4  
3919.06621,0.00223,6.30284E-5,1.45227,1.05384E-4  
3918.10187,0.00228,6.17703E-5,1.45224,9.96737E-5  
3917.13754,0.0023,6.25863E-5,1.45232,8.59112E-5  
3916.1732,0.00219,5.02387E-5,1.45233,8.55141E-5  
3915.20886,0.00217,4.47254E-5,1.45223,9.07021E-5  
3914.24453,0.00223,4.24458E-5,1.4522,9.63897E-5  
3913.28019,0.00224,4.40134E-5,1.4522,1.07935E-4  
3912.31585,0.00225,5.16764E-5,1.45219,1.18965E-4  
3911.35151,0.00229,5.78073E-5,1.45219,1.12173E-4  
3910.38718,0.00228,5.29096E-5,1.45223,1.02093E-4  
3909.42284,0.00228,4.62792E-5,1.45221,9.46259E-5  
3908.4585,0.00229,4.86934E-5,1.45222,9.79134E-5  
3907.49417,0.0023,5.25123E-5,1.45224,1.03335E-4  
3906.52983,0.00227,5.10964E-5,1.45228,9.73247E-5  
3905.56549,0.00226,5.34525E-5,1.45225,9.88492E-5  
3904.60115,0.00226,6.96828E-5,1.45233,8.96342E-5  
3903.63682,0.00209,5.43243E-5,1.45229,9.59867E-5  
3902.67248,0.00213,6.26684E-5,1.45214,1.03478E-4  
3901.70814,0.00218,7.27494E-5,1.45217,1.06788E-4  
3900.7438,0.00216,5.99051E-5,1.45213,1.15825E-4  
3899.77947,0.00222,6.98495E-5,1.45213,1.02581E-4  
3898.81513,0.00216,6.21734E-5,1.45217,1.08999E-4  
3897.85079,0.00215,4.57958E-5,1.45208,1.13759E-4  
3896.88646,0.00219,4.22103E-5,1.45206,1.09766E-4  
3895.92212,0.00222,4.74052E-5,1.45205,1.05924E-4  
3894.95778,0.00226,5.56239E-5,1.45206,9.95253E-5  
3893.99344,0.00224,4.57924E-5,1.45206,1.01036E-4  
3893.02911,0.00232,5.46027E-5,1.452,1.12368E-4  
3892.06477,0.00243,8.04524E-5,1.45216,8.94377E-5  
3891.10043,0.00224,7.59934E-5,1.45229,7.72157E-5  
3890.1361,0.00213,5.13248E-5,1.45213,9.81912E-5  
3889.17176,0.00223,4.95233E-5,1.4521,9.728E-5  
3888.20742,0.00221,4.91007E-5,1.45216,9.61665E-5  
3887.24308,0.00219,5.26024E-5,1.45211,1.09379E-4  
3886.27875,0.00221,8.27837E-5,1.45223,8.37389E-5  
3885.31441,0.00195,5.10382E-5,1.45219,7.63537E-5  
3884.35007,0.002,4.03877E-5,1.45188,8.40982E-5  
3883.38574,0.0022,4.50964E-5,1.45189,8.56672E-5  
3882.4214,0.00225,5.05431E-5,1.45195,9.00837E-5  
3881.45706,0.00227,6.61701E-5,1.45201,9.1637E-5  
3880.49272,0.00224,9.15911E-5,1.4521,9.02034E-5  
3879.52839,0.00211,6.53019E-5,1.45208,1.08743E-4  
3878.56405,0.00214,4.18836E-5,1.45197,1.02378E-4  
3877.59971,0.00217,3.78435E-5,1.452,9.19918E-5  
3876.63538,0.00217,3.75682E-5,1.452,9.43922E-5  
3875.67104,0.00214,3.6007E-5,1.45203,9.59211E-5  
3874.7067,0.00212,6.70654E-5,1.45201,9.41403E-5  
3873.74236,0.00206,6.89754E-5,1.45197,1.0672E-4  
3872.77803,0.00212,4.66944E-5,1.45188,1.08001E-4

3871.81369,0.00214,5.25069E-5,1.45195,9.86977E-5  
3870.84935,0.00211,1.10712E-4,1.45189,1.06224E-4  
3869.88502,0.00215,1.50718E-4,1.45196,9.74729E-5  
3868.92068,0.00202,7.17345E-5,1.45192,1.31548E-4  
3867.95634,0.00207,3.69208E-5,1.45181,1.17348E-4  
3866.992,0.00211,3.51952E-5,1.45178,1.17095E-4  
3866.02767,0.00219,5.24776E-5,1.45176,1.21959E-4  
3865.06333,0.00224,7.87244E-5,1.45188,1.03895E-4  
3864.09899,0.0021,5.46705E-5,1.4519,1.02608E-4  
3863.13466,0.00211,4.47137E-5,1.45178,1.06866E-4  
3862.17032,0.00214,6.07248E-5,1.45182,1.16501E-4  
3861.20598,0.00212,5.80348E-5,1.45175,1.36447E-4  
3860.24164,0.00218,5.27096E-5,1.45174,1.31989E-4  
3859.27731,0.00222,5.57043E-5,1.45175,1.11518E-4  
3858.31297,0.00219,5.16113E-5,1.4518,1.04298E-4  
3857.34863,0.0022,4.81272E-5,1.45174,1.11766E-4  
3856.3843,0.00216,4.94588E-5,1.45175,1.27601E-4  
3855.41996,0.00234,1.09524E-4,1.45151,1.63033E-4  
3854.45562,0.00267,2.38568E-4,1.452,9.14957E-5  
3853.49128,0.00206,1.9738E-4,1.45223,1.28413E-4  
3852.52695,0.00199,1.2373E-4,1.45184,1.69453E-4  
3851.56261,0.00207,6.81924E-5,1.45184,1.74849E-4  
3850.59827,0.00208,4.80183E-5,1.45179,1.395E-4  
3849.63394,0.00206,4.78108E-5,1.45179,1.2537E-4  
3848.6696,0.00207,3.91497E-5,1.45171,1.25475E-4  
3847.70526,0.00212,3.70987E-5,1.45172,1.24697E-4  
3846.74092,0.00212,4.01194E-5,1.45173,1.11786E-4  
3845.77659,0.00211,4.16723E-5,1.45172,1.0946E-4  
3844.81225,0.00215,4.75824E-5,1.45174,9.47772E-5  
3843.84791,0.00206,4.2124E-5,1.45178,8.63707E-5  
3842.88358,0.00204,4.9113E-5,1.45166,1.02944E-4  
3841.91924,0.00213,5.95883E-5,1.45166,1.04321E-4  
3840.9549,0.00214,7.14799E-5,1.45175,8.32448E-5  
3839.99056,0.002,7.09684E-5,1.45176,9.33271E-5  
3839.02623,0.00203,9.24729E-5,1.4516,1.03201E-4  
3838.06189,0.00209,1.37162E-4,1.45174,1.12698E-4  
3837.09755,0.00185,6.53455E-5,1.45166,1.66323E-4  
3836.13322,0.00197,4.31778E-5,1.45143,1.38504E-4  
3835.16888,0.00209,4.72996E-5,1.4515,1.14551E-4  
3834.20454,0.00207,4.50148E-5,1.4515,1.21654E-4  
3833.2402,0.00211,3.81279E-5,1.45148,1.25472E-4  
3832.27587,0.00212,4.91877E-5,1.45153,1.10636E-4  
3831.31153,0.00204,4.99352E-5,1.45152,1.24873E-4  
3830.34719,0.00208,4.91802E-5,1.45141,1.24902E-4  
3829.38286,0.00216,4.82274E-5,1.45142,1.16424E-4  
3828.41852,0.00221,5.11363E-5,1.45144,1.14521E-4  
3827.45418,0.00222,5.8207E-5,1.45153,1.08796E-4  
3826.48984,0.00214,6.13108E-5,1.45155,1.14169E-4  
3825.52551,0.00212,4.59093E-5,1.4515,1.27331E-4  
3824.56117,0.00214,4.8786E-5,1.45149,1.0633E-4  
3823.59683,0.0021,4.58431E-5,1.45149,1.02424E-4  
3822.6325,0.00217,7.46173E-5,1.45136,1.12098E-4  
3821.66816,0.00234,1.40697E-4,1.45158,1.02378E-4  
3820.70382,0.00201,7.95257E-5,1.45174,1.48351E-4  
3819.73948,0.00188,3.92E-5,1.45144,1.42916E-4  
3818.77515,0.00204,4.34893E-5,1.4513,1.3789E-4  
3817.81081,0.0022,6.44318E-5,1.45135,1.15347E-4  
3816.84647,0.00217,8.7282E-5,1.45152,8.77456E-5  
3815.88214,0.00199,9.78701E-5,1.45149,1.27103E-4  
3814.9178,0.002,5.49991E-5,1.45131,1.52798E-4  
3813.95346,0.00213,6.51798E-5,1.45129,1.14966E-4  
3812.98912,0.00215,5.67342E-5,1.45136,1.07309E-4  
3812.02479,0.00214,5.0845E-5,1.45138,1.03472E-4  
3811.06045,0.0021,4.77189E-5,1.4514,1.07464E-4  
3810.09611,0.00207,4.1464E-5,1.45137,1.07738E-4

3809.13177,0.00204,4.4655E-5,1.45135,1.16954E-4  
3808.16744,0.00206,5.42526E-5,1.45128,1.18374E-4  
3807.2031,0.00206,7.95313E-5,1.45129,1.22486E-4  
3806.23876,0.00202,6.53954E-5,1.45119,1.57874E-4  
3805.27443,0.00218,7.38195E-5,1.4511,1.46152E-4  
3804.31009,0.00227,6.92052E-5,1.45121,1.16813E-4  
3803.34575,0.00226,7.28177E-5,1.45125,1.20167E-4  
3802.38141,0.00233,1.15607E-4,1.45134,9.88655E-5  
3801.41708,0.00219,1.19663E-4,1.45151,9.7766E-5  
3800.45274,0.00198,6.67031E-5,1.45138,1.28403E-4  
3799.4884,0.00205,5.04159E-5,1.45123,1.22919E-4  
3798.52407,0.00209,4.56829E-5,1.45121,1.29753E-4  
3797.55973,0.00218,6.05017E-5,1.4512,1.11883E-4  
3796.59539,0.00215,5.65376E-5,1.4513,1.04321E-4  
3795.63105,0.00208,4.77253E-5,1.45124,1.14914E-4  
3794.66672,0.00212,4.98063E-5,1.4512,1.17718E-4  
3793.70238,0.00214,3.83443E-5,1.45121,1.18238E-4  
3792.73804,0.00215,3.91305E-5,1.45121,1.17834E-4  
3791.77371,0.00216,4.31684E-5,1.45122,1.16388E-4  
3790.80937,0.00213,4.50591E-5,1.45127,1.13181E-4  
3789.84503,0.00205,4.08704E-5,1.45123,1.06507E-4  
3788.88069,0.00205,4.17677E-5,1.45114,1.15087E-4  
3787.91636,0.00214,4.99423E-5,1.4511,1.11355E-4  
3786.95202,0.0022,5.58636E-5,1.45115,1.05212E-4  
3785.98768,0.00219,6.15391E-5,1.45122,9.84396E-5  
3785.02335,0.00212,4.75467E-5,1.45126,9.86128E-5  
3784.05901,0.00207,3.95618E-5,1.45121,1.02312E-4  
3783.09467,0.00208,3.67867E-5,1.45119,1.05597E-4  
3782.13033,0.00205,3.66277E-5,1.4512,1.02795E-4  
3781.166,0.00201,3.98281E-5,1.45117,1.16604E-4  
3780.20166,0.002,4.52051E-5,1.45115,1.1752E-4  
3779.23732,0.00193,4.27634E-5,1.4511,1.05655E-4  
3778.27299,0.00198,3.68081E-5,1.45096,1.01694E-4  
3777.30865,0.00208,3.5021E-5,1.45097,1.01559E-4  
3776.34431,0.00209,3.59116E-5,1.45099,1.0593E-4  
3775.37997,0.00212,4.44267E-5,1.45098,1.19834E-4  
3774.41564,0.00216,5.82573E-5,1.45102,1.0356E-4  
3773.4513,0.00214,4.52589E-5,1.45107,8.98115E-5  
3772.48696,0.0021,4.03486E-5,1.45107,9.26806E-5  
3771.52263,0.0021,4.77578E-5,1.45106,9.58919E-5  
3770.55829,0.00207,6.1205E-5,1.45114,9.00449E-5  
3769.59395,0.00189,6.12139E-5,1.4511,1.05675E-4  
3768.62961,0.00189,4.29421E-5,1.45087,1.25577E-4  
3767.66528,0.00204,4.21778E-5,1.45081,1.24055E-4  
3766.70094,0.00214,5.13759E-5,1.45088,1.05055E-4  
3765.7366,0.0021,6.06369E-5,1.45096,9.80201E-5  
3764.77227,0.00207,5.33294E-5,1.45093,1.08655E-4  
3763.80793,0.00208,4.27753E-5,1.45094,1.16697E-4  
3762.84359,0.00205,4.27934E-5,1.45091,1.19542E-4  
3761.87925,0.00208,4.28121E-5,1.45089,1.24759E-4  
3760.91492,0.00211,5.55642E-5,1.45092,1.17208E-4  
3759.95058,0.00203,6.8541E-5,1.45098,1.12789E-4  
3758.98624,0.00196,5.77594E-5,1.45085,1.17739E-4  
3758.02191,0.00206,5.78359E-5,1.45079,1.1448E-4  
3757.05757,0.00209,7.10033E-5,1.45085,9.81013E-5  
3756.09323,0.00202,6.30237E-5,1.45085,1.11042E-4  
3755.12889,0.00206,4.99228E-5,1.45076,1.25307E-4  
3754.16456,0.00214,5.70623E-5,1.45077,1.40418E-4  
3753.20022,0.00224,1.05466E-4,1.45086,1.25141E-4  
3752.23588,0.00207,1.39626E-4,1.45107,1.00049E-4  
3751.27155,0.00184,8.16077E-5,1.45083,1.32511E-4  
3750.30721,0.00206,9.31523E-5,1.45068,1.20924E-4  
3749.34287,0.00213,1.19893E-4,1.45086,1.07385E-4  
3748.37853,0.00195,7.53093E-5,1.45088,1.16406E-4  
3747.4142,0.00196,5.47582E-5,1.45073,8.65332E-5

3746.44986,0.00195,5.31635E-5,1.45071,1.00932E-4  
3745.48552,0.00221,1.48885E-4,1.45049,1.40375E-4  
3744.52119,0.00242,2.94307E-4,1.4511,1.31263E-4  
3743.55685,0.00168,7.06803E-5,1.4511,2.48095E-4  
3742.59251,0.00184,3.81195E-5,1.4506,1.54964E-4  
3741.62817,0.00199,4.48084E-5,1.45073,1.44586E-4  
3740.66384,0.00199,4.06186E-5,1.45076,1.1698E-4  
3739.6995,0.00186,3.82097E-5,1.45082,1.39406E-4  
3738.73516,0.00179,4.64784E-5,1.45068,1.15502E-4  
3737.77083,0.00181,4.17641E-5,1.4506,1.00769E-4  
3736.80649,0.00186,7.6336E-5,1.45054,1.10547E-4  
3735.84215,0.00186,7.79132E-5,1.45053,1.46725E-4  
3734.87781,0.00189,8.14316E-5,1.45046,1.32185E-4  
3733.91348,0.00191,6.22082E-5,1.45045,1.28064E-4  
3732.94914,0.002,6.91474E-5,1.45039,1.12171E-4  
3731.9848,0.00204,8.49372E-5,1.45047,1.21429E-4  
3731.02047,0.00205,5.67765E-5,1.45045,1.34048E-4  
3730.05613,0.00208,4.57404E-5,1.45053,1.18636E-4  
3729.09179,0.002,4.45575E-5,1.45055,1.04718E-4  
3728.12745,0.00196,5.28288E-5,1.4505,1.16451E-4  
3727.16312,0.002,5.78346E-5,1.45045,1.24925E-4  
3726.19878,0.002,5.88869E-5,1.45048,1.27125E-4  
3725.23444,0.00199,5.74191E-5,1.45046,1.13855E-4  
3724.2701,0.00198,4.84916E-5,1.45049,1.01763E-4  
3723.30577,0.00193,5.63816E-5,1.45045,9.96173E-5  
3722.34143,0.00194,6.31063E-5,1.45041,1.23023E-4  
3721.37709,0.00196,3.77485E-5,1.45039,1.31236E-4  
3720.41276,0.00194,3.64793E-5,1.4504,1.19079E-4  
3719.44842,0.00191,4.77751E-5,1.45036,1.19251E-4  
3718.48408,0.00191,4.38494E-5,1.45029,1.41473E-4  
3717.51974,0.00197,3.70431E-5,1.45023,1.44633E-4  
3716.55541,0.00204,4.51966E-5,1.45022,1.33667E-4  
3715.59107,0.00213,4.98792E-5,1.45028,1.15437E-4  
3714.62673,0.00208,4.2705E-5,1.4504,1.09002E-4  
3713.6624,0.002,4.06232E-5,1.45038,1.10526E-4  
3712.69806,0.00195,6.55852E-5,1.45039,1.01919E-4  
3711.73372,0.00186,7.23385E-5,1.4503,1.22674E-4  
3710.76938,0.00192,5.60545E-5,1.45018,1.35038E-4  
3709.80505,0.00198,5.65545E-5,1.45021,1.21666E-4  
3708.84071,0.00194,5.20408E-5,1.45019,1.35526E-4  
3707.87637,0.00199,4.33563E-5,1.45013,1.44022E-4  
3706.91204,0.00205,4.68239E-5,1.45016,1.3596E-4  
3705.9477,0.00206,4.8884E-5,1.45017,1.24155E-4  
3704.98336,0.00208,4.69559E-5,1.4502,1.1118E-4  
3704.01902,0.00205,3.54367E-5,1.45027,1.02862E-4  
3703.05469,0.00192,3.60243E-5,1.45026,1.08392E-4  
3702.09035,0.0019,4.95813E-5,1.45011,1.2398E-4  
3701.12601,0.00202,5.29142E-5,1.45007,1.26373E-4  
3700.16168,0.00206,4.45537E-5,1.45011,1.15828E-4  
3699.19734,0.00207,4.04319E-5,1.45015,1.20523E-4  
3698.233,0.00207,4.40094E-5,1.45021,1.12015E-4  
3697.26866,0.00198,4.10159E-5,1.45027,1.06086E-4  
3696.30433,0.00188,4.07853E-5,1.4502,1.13607E-4  
3695.33999,0.00186,3.83167E-5,1.45011,1.18525E-4  
3694.37565,0.00192,4.03487E-5,1.45005,1.14907E-4  
3693.41132,0.00197,4.07539E-5,1.45007,1.17507E-4  
3692.44698,0.00198,4.57063E-5,1.45015,1.06189E-4  
3691.48264,0.00186,6.14282E-5,1.45022,1.05062E-4  
3690.5183,0.00173,5.3341E-5,1.45013,1.31379E-4  
3689.55397,0.00167,4.16691E-5,1.45009,1.32725E-4  
3688.58963,0.00149,6.14215E-5,1.44992,1.26627E-4  
3687.62529,0.00159,4.41454E-5,1.44956,1.50558E-4  
3686.66096,0.00192,3.05641E-5,1.44949,1.51301E-4  
3685.69662,0.00205,3.4857E-5,1.44965,1.42498E-4  
3684.73228,0.00205,3.26958E-5,1.44972,1.42113E-4

3683.76794,0.00205,4.03942E-5,1.44975,1.35492E-4  
3682.80361,0.00204,3.97642E-5,1.44976,1.26406E-4  
3681.83927,0.00202,4.04717E-5,1.44974,1.30954E-4  
3680.87493,0.00208,5.55293E-5,1.44972,1.3445E-4  
3679.9106,0.00209,5.93984E-5,1.4498,1.18287E-4  
3678.94626,0.00203,4.03489E-5,1.44979,1.17238E-4  
3677.98192,0.00203,3.94036E-5,1.44975,1.33014E-4  
3677.01758,0.00211,7.96625E-5,1.44972,1.25504E-4  
3676.05325,0.00215,1.48773E-4,1.44991,9.30119E-5  
3675.08891,0.00184,1.18482E-4,1.44993,1.52058E-4  
3674.12457,0.00183,5.33462E-5,1.44965,1.58174E-4  
3673.16024,0.00193,4.41071E-5,1.44961,1.29546E-4  
3672.1959,0.002,5.23804E-5,1.44955,1.31197E-4  
3671.23156,0.00212,8.64481E-5,1.44964,1.29631E-4  
3670.26722,0.00201,8.60923E-5,1.44973,1.39618E-4  
3669.30289,0.00195,7.45185E-5,1.44962,1.55631E-4  
3668.33855,0.00203,5.51179E-5,1.44956,1.78578E-4  
3667.37421,0.00207,3.51042E-5,1.44961,1.72303E-4  
3666.40988,0.00203,3.71553E-5,1.44962,1.5978E-4  
3665.44554,0.00202,4.17521E-5,1.44959,1.56594E-4  
3664.4812,0.00204,4.5941E-5,1.44956,1.60365E-4  
3663.51686,0.00207,4.58741E-5,1.44955,1.63058E-4  
3662.55253,0.00211,4.81454E-5,1.44959,1.53191E-4  
3661.58819,0.00207,4.52095E-5,1.44965,1.51225E-4  
3660.62385,0.00199,5.44696E-5,1.44963,1.47671E-4  
3659.65952,0.00198,5.37529E-5,1.44959,1.24125E-4  
3658.69518,0.00194,3.83332E-5,1.44958,1.17072E-4  
3657.73084,0.00192,3.81175E-5,1.4495,1.26055E-4  
3656.7665,0.00195,6.06039E-5,1.44948,1.21541E-4  
3655.80217,0.00192,5.54394E-5,1.44945,1.29219E-4  
3654.83783,0.00198,4.44672E-5,1.44939,1.40212E-4  
3653.87349,0.00201,4.75893E-5,1.44943,1.47838E-4  
3652.90916,0.00202,3.93791E-5,1.44941,1.70917E-4  
3651.94482,0.00208,7.89882E-5,1.44952,1.52598E-4  
3650.98048,0.00184,7.15573E-5,1.44967,1.13758E-4  
3650.01614,0.00154,5.25025E-5,1.4494,1.14127E-4  
3649.05181,0.00167,6.24327E-5,1.44901,1.43139E-4  
3648.08747,0.00198,7.30046E-5,1.44895,1.60486E-4  
3647.12313,0.00209,8.62628E-5,1.44907,1.62764E-4  
3646.1588,0.00209,7.11115E-5,1.44909,1.61401E-4  
3645.19446,0.00216,6.4692E-5,1.44908,1.55718E-4  
3644.23012,0.00222,6.52072E-5,1.44914,1.41392E-4  
3643.26578,0.00223,5.69277E-5,1.4492,1.28565E-4  
3642.30145,0.00222,5.24249E-5,1.44926,1.25218E-4  
3641.33711,0.00218,5.28436E-5,1.44932,1.18299E-4  
3640.37277,0.00208,4.23264E-5,1.44934,1.08086E-4  
3639.40844,0.00202,4.56823E-5,1.44925,1.17221E-4  
3638.4441,0.00208,4.45006E-5,1.44919,1.28134E-4  
3637.47976,0.0021,4.16016E-5,1.44924,1.21193E-4  
3636.51542,0.00203,4.1553E-5,1.44924,1.20606E-4  
3635.55109,0.002,4.1888E-5,1.44916,1.29738E-4  
3634.58675,0.00203,4.46143E-5,1.4491,1.29552E-4  
3633.62241,0.00208,4.82827E-5,1.44908,1.28082E-4  
3632.65807,0.00213,4.22882E-5,1.4491,1.29609E-4  
3631.69374,0.00214,4.14397E-5,1.44917,1.27166E-4  
3630.7294,0.00208,6.22175E-5,1.4492,1.17421E-4  
3629.76506,0.00203,1.16889E-4,1.44922,1.09038E-4  
3628.80073,0.00186,1.25071E-4,1.44923,1.53822E-4  
3627.83639,0.00174,7.47918E-5,1.44897,1.89328E-4  
3626.87205,0.00196,5.50386E-5,1.44875,1.95196E-4  
3625.90771,0.00216,5.05158E-5,1.44886,1.88881E-4  
3624.94338,0.00211,4.26318E-5,1.44898,1.65369E-4  
3623.97904,0.00204,3.95065E-5,1.44892,1.63562E-4  
3623.0147,0.00212,5.29466E-5,1.44885,1.64505E-4  
3622.05037,0.00223,6.5617E-5,1.44894,1.48635E-4

3621.08603,0.00218,5.90178E-5,1.44909,1.21483E-4  
3620.12169,0.00199,4.94814E-5,1.44913,1.13219E-4  
3619.15735,0.00185,4.67483E-5,1.44898,1.20556E-4  
3618.19302,0.00187,5.15568E-5,1.4488,1.43015E-4  
3617.22868,0.00198,4.97604E-5,1.44871,1.73722E-4  
3616.26434,0.00208,5.21333E-5,1.44871,1.77817E-4  
3615.30001,0.00211,6.0403E-5,1.44876,1.4563E-4  
3614.33567,0.00211,5.40705E-5,1.44877,1.32505E-4  
3613.37133,0.00211,5.72518E-5,1.44879,1.35505E-4  
3612.40699,0.00206,6.05805E-5,1.44876,1.41816E-4  
3611.44266,0.00212,4.78843E-5,1.44869,1.50544E-4  
3610.47832,0.00221,5.42981E-5,1.44877,1.33446E-4  
3609.51398,0.0021,7.1351E-5,1.44888,1.31287E-4  
3608.54965,0.00198,6.16259E-5,1.44878,1.59853E-4  
3607.58531,0.00201,5.25176E-5,1.44869,1.70435E-4  
3606.62097,0.00203,4.19722E-5,1.44863,1.96901E-4  
3605.65663,0.00214,6.28286E-5,1.4486,1.94664E-4  
3604.6923,0.00219,7.6324E-5,1.44871,1.44087E-4  
3603.72796,0.0021,4.1362E-5,1.44879,1.23385E-4  
3602.76362,0.00198,3.45144E-5,1.44875,1.32571E-4  
3601.79929,0.00196,3.95374E-5,1.44864,1.48994E-4  
3600.83495,0.00199,3.98725E-5,1.4486,1.78279E-4  
3599.87061,0.00198,4.02955E-5,1.44857,1.81892E-4  
3598.90627,0.00198,4.07118E-5,1.44851,1.66116E-4  
3597.94194,0.00202,4.55831E-5,1.44844,1.74089E-4  
3596.9776,0.00211,6.4366E-5,1.44842,1.88627E-4  
3596.01326,0.00218,9.28092E-5,1.44848,1.58369E-4  
3595.04893,0.00216,8.18053E-5,1.44855,1.34938E-4  
3594.08459,0.00212,6.21245E-5,1.44859,1.27864E-4  
3593.12025,0.00203,4.44309E-5,1.4486,1.22602E-4  
3592.15591,0.00197,3.37153E-5,1.44855,1.25127E-4  
3591.19158,0.00192,4.19953E-5,1.44848,1.36468E-4  
3590.22724,0.00194,5.15893E-5,1.44837,1.44892E-4  
3589.2629,0.00201,5.2653E-5,1.44839,1.3928E-4  
3588.29857,0.00195,5.09538E-5,1.44841,1.49732E-4  
3587.33423,0.00192,4.78094E-5,1.44833,1.79649E-4  
3586.36989,0.00193,5.32788E-5,1.44827,1.80818E-4  
3585.40555,0.00195,5.78205E-5,1.44821,1.60932E-4  
3584.44122,0.00203,5.67717E-5,1.44816,1.48787E-4  
3583.47688,0.00208,5.9375E-5,1.44821,1.46416E-4  
3582.51254,0.00202,5.73531E-5,1.44824,1.42297E-4  
3581.54821,0.00199,5.68211E-5,1.44816,1.33657E-4  
3580.58387,0.00204,4.16514E-5,1.44812,1.302E-4  
3579.61953,0.00205,4.34617E-5,1.44811,1.37237E-4  
3578.65519,0.00208,5.00966E-5,1.44807,1.47669E-4  
3577.69086,0.00213,5.95587E-5,1.44809,1.43554E-4  
3576.72652,0.00213,6.02854E-5,1.44811,1.35004E-4  
3575.76218,0.00214,5.76506E-5,1.44813,1.28861E-4  
3574.79785,0.0021,5.0184E-5,1.44817,1.28766E-4  
3573.83351,0.00205,4.34759E-5,1.44812,1.32754E-4  
3572.86917,0.00207,4.1545E-5,1.4481,1.31297E-4  
3571.90483,0.00205,3.90668E-5,1.44812,1.35856E-4  
3570.9405,0.00198,3.98052E-5,1.44809,1.48085E-4  
3569.97616,0.00197,4.13033E-5,1.44802,1.55377E-4  
3569.01182,0.00199,5.27847E-5,1.44799,1.44668E-4  
3568.04749,0.00199,6.69719E-5,1.44797,1.34091E-4  
3567.08315,0.00197,6.93407E-5,1.44798,1.34982E-4  
3566.11881,0.00189,6.50975E-5,1.44791,1.54305E-4  
3565.15447,0.00194,4.99754E-5,1.44778,1.78631E-4  
3564.19014,0.00202,4.25327E-5,1.44779,1.81225E-4  
3563.2258,0.00202,4.79229E-5,1.44781,1.71025E-4  
3562.26146,0.00199,4.89631E-5,1.4478,1.63759E-4  
3561.29713,0.00195,4.40459E-5,1.44777,1.51605E-4  
3560.33279,0.00195,3.51857E-5,1.44766,1.45478E-4  
3559.36845,0.00203,3.34367E-5,1.44761,1.55329E-4

3558.40411,0.0021,3.9754E-5,1.44761,1.66861E-4  
3557.43978,0.00215,5.56205E-5,1.44766,1.52622E-4  
3556.47544,0.00211,5.28649E-5,1.44773,1.35601E-4  
3555.5111,0.00203,4.28067E-5,1.44773,1.35161E-4  
3554.54677,0.00197,3.82136E-5,1.44765,1.47944E-4  
3553.58243,0.002,3.62845E-5,1.4476,1.54637E-4  
3552.61809,0.00198,3.72194E-5,1.44762,1.48133E-4  
3551.65375,0.0019,3.58799E-5,1.44752,1.55592E-4  
3550.68942,0.00196,3.0345E-5,1.44741,1.60133E-4  
3549.72508,0.00201,2.63248E-5,1.44739,1.63071E-4  
3548.76074,0.00206,3.58603E-5,1.44733,1.84753E-4  
3547.79641,0.00216,6.27967E-5,1.44738,1.74215E-4  
3546.83207,0.00211,5.08329E-5,1.44749,1.61122E-4  
3545.86773,0.00196,4.53805E-5,1.44746,1.60635E-4  
3544.90339,0.00191,4.21145E-5,1.4473,1.50672E-4  
3543.93906,0.00201,3.85011E-5,1.44719,1.50104E-4  
3542.97472,0.00206,4.18451E-5,1.44719,1.56241E-4  
3542.01038,0.00207,4.06196E-5,1.44712,1.55904E-4  
3541.04604,0.00218,4.2168E-5,1.44708,1.63102E-4  
3540.08171,0.00226,5.15998E-5,1.44714,1.6359E-4  
3539.11737,0.00226,5.01627E-5,1.4472,1.62277E-4  
3538.15303,0.00224,5.54942E-5,1.44726,1.55926E-4  
3537.1887,0.00211,4.18034E-5,1.44728,1.47712E-4  
3536.22436,0.00201,3.23385E-5,1.44712,1.58924E-4  
3535.26002,0.00214,4.3506E-5,1.44697,1.65549E-4  
3534.29568,0.00226,5.11535E-5,1.44702,1.55322E-4  
3533.33135,0.00226,5.37998E-5,1.44709,1.52388E-4  
3532.36701,0.00223,5.3082E-5,1.4471,1.4409E-4  
3531.40267,0.00219,4.69591E-5,1.4471,1.37109E-4  
3530.43834,0.00214,4.26884E-5,1.44705,1.50913E-4  
3529.474,0.00218,4.09546E-5,1.44696,1.75105E-4  
3528.50966,0.00228,5.92049E-5,1.44699,1.68047E-4  
3527.54532,0.00222,5.2082E-5,1.44707,1.55987E-4  
3526.58099,0.00217,4.54949E-5,1.44702,1.64302E-4  
3525.61665,0.00217,4.57819E-5,1.44702,1.67437E-4  
3524.65231,0.00207,4.73442E-5,1.44703,1.6132E-4  
3523.68798,0.00196,4.63999E-5,1.44689,1.55548E-4  
3522.72364,0.00201,3.61547E-5,1.44671,1.61501E-4  
3521.7593,0.00213,3.80187E-5,1.44665,1.72254E-4  
3520.79496,0.00222,4.54859E-5,1.44665,1.75539E-4  
3519.83063,0.00226,5.40205E-5,1.44669,1.66204E-4  
3518.86629,0.00224,5.20546E-5,1.44669,1.6499E-4  
3517.90195,0.00225,5.00492E-5,1.44666,1.73302E-4  
3516.93762,0.00229,5.96879E-5,1.44666,1.7004E-4  
3515.97328,0.0023,6.3844E-5,1.44669,1.63251E-4  
3515.00894,0.00227,6.42628E-5,1.44672,1.61217E-4  
3514.0446,0.00219,6.86473E-5,1.44671,1.53992E-4  
3513.08027,0.00215,6.1138E-5,1.4466,1.42159E-4  
3512.11593,0.00222,4.62412E-5,1.44652,1.37801E-4  
3511.15159,0.00228,4.29974E-5,1.44654,1.43916E-4  
3510.18726,0.00225,4.85115E-5,1.44656,1.59303E-4  
3509.22292,0.00224,4.49636E-5,1.44654,1.6976E-4  
3508.25858,0.00224,4.46869E-5,1.44654,1.61109E-4  
3507.29424,0.00218,4.22967E-5,1.44652,1.59576E-4  
3506.32991,0.00217,4.50661E-5,1.44646,1.65739E-4  
3505.36557,0.00218,4.13071E-5,1.44644,1.68485E-4  
3504.40123,0.00214,3.84795E-5,1.44644,1.72698E-4  
3503.4369,0.00207,4.37621E-5,1.44639,1.67243E-4  
3502.47256,0.00202,4.59996E-5,1.44625,1.6063E-4  
3501.50822,0.0021,3.73551E-5,1.4461,1.64035E-4  
3500.54388,0.00222,2.93958E-5,1.44608,1.70136E-4  
3499.57955,0.00224,2.64121E-5,1.44614,1.78277E-4  
3498.61521,0.00216,3.19004E-5,1.4461,1.85028E-4  
3497.65087,0.00217,4.53718E-5,1.44594,1.93112E-4  
3496.68654,0.00235,7.01031E-5,1.44586,1.92299E-4



3495.7222,0.00249,9.12677E-5,1.44596,1.68954E-4  
3494.75786,0.00247,7.79377E-5,1.4461,1.43542E-4  
3493.79352,0.00234,4.63955E-5,1.44613,1.3672E-4  
3492.82919,0.00229,3.83277E-5,1.44602,1.48941E-4  
3491.86485,0.00234,4.12054E-5,1.44599,1.58677E-4  
3490.90051,0.00228,4.52322E-5,1.44602,1.59837E-4  
3489.93618,0.00221,4.60693E-5,1.44591,1.71316E-4  
3488.97184,0.0023,4.63063E-5,1.44582,1.74098E-4  
3488.0075,0.0023,4.48534E-5,1.44587,1.64494E-4  
3487.04316,0.00221,3.89644E-5,1.44578,1.75104E-4  
3486.07883,0.00228,4.13188E-5,1.44564,1.85088E-4  
3485.11449,0.00239,5.73439E-5,1.44563,1.718E-4  
3484.15015,0.00241,5.22962E-5,1.44564,1.7007E-4  
3483.18582,0.00245,4.78581E-5,1.44564,1.82599E-4  
3482.22148,0.00244,5.2997E-5,1.4457,1.86425E-4  
3481.25714,0.00236,5.24908E-5,1.44567,1.95155E-4  
3480.2928,0.00236,6.31181E-5,1.44557,1.97365E-4  
3479.32847,0.00238,6.89557E-5,1.44553,1.76431E-4  
3478.36413,0.00239,5.24138E-5,1.44547,1.68905E-4  
3477.39979,0.00248,5.89545E-5,1.44541,1.74133E-4  
3476.43546,0.00255,6.63667E-5,1.44547,1.6147E-4  
3475.47112,0.0025,5.55414E-5,1.44552,1.47049E-4  
3474.50678,0.00243,4.51415E-5,1.44549,1.56134E-4  
3473.54244,0.00241,4.65794E-5,1.44541,1.81136E-4  
3472.57811,0.00242,4.3327E-5,1.44536,1.96733E-4  
3471.61377,0.00244,4.84192E-5,1.44531,2.03975E-4  
3470.64943,0.00246,6.23851E-5,1.44531,1.97065E-4  
3469.6851,0.00242,6.51386E-5,1.44528,1.77402E-4  
3468.72076,0.00241,5.60207E-5,1.44521,1.66651E-4  
3467.75642,0.00239,4.42106E-5,1.44516,1.69499E-4  
3466.79208,0.0024,4.30097E-5,1.44501,1.85523E-4  
3465.82775,0.00257,5.63075E-5,1.44494,1.84696E-4  
3464.86341,0.00262,5.52059E-5,1.44506,1.71178E-4  
3463.89907,0.00254,5.36333E-5,1.44505,1.68525E-4  
3462.93474,0.00254,5.70087E-5,1.44496,1.70684E-4  
3461.9704,0.00258,4.83579E-5,1.44491,1.93597E-4  
3461.00606,0.0026,5.4861E-5,1.44493,1.92998E-4  
3460.04172,0.00251,4.8654E-5,1.44486,1.71961E-4  
3459.07739,0.00261,4.33549E-5,1.44467,1.82284E-4  
3458.11305,0.0028,6.36842E-5,1.44473,1.81319E-4  
3457.14871,0.00277,6.22967E-5,1.44485,1.64165E-4  
3456.18437,0.00268,4.92655E-5,1.44481,1.65068E-4  
3455.22004,0.00266,4.47547E-5,1.44472,1.84469E-4  
3454.2557,0.00271,4.60232E-5,1.44463,2.05715E-4  
3453.29136,0.0028,6.05461E-5,1.44458,2.15925E-4  
3452.32703,0.00289,7.64578E-5,1.44462,1.98854E-4  
3451.36269,0.00288,6.54657E-5,1.44467,1.85021E-4  
3450.39835,0.00287,6.0453E-5,1.44466,1.90731E-4  
3449.43401,0.00287,6.54424E-5,1.44466,1.90491E-4  
3448.46968,0.00286,6.47409E-5,1.44467,1.87604E-4  
3447.50534,0.00279,5.92488E-5,1.44464,1.86071E-4  
3446.541,0.00278,5.93929E-5,1.44451,1.86317E-4  
3445.57667,0.00292,6.16942E-5,1.44447,1.82689E-4  
3444.61233,0.00293,5.67837E-5,1.44458,1.86401E-4  
3443.64799,0.00283,6.05022E-5,1.44456,1.9588E-4  
3442.68365,0.00282,7.16326E-5,1.44449,1.82548E-4  
3441.71932,0.00284,6.47314E-5,1.44446,1.73422E-4  
3440.75498,0.00283,5.76392E-5,1.44442,1.89812E-4  
3439.79064,0.00286,5.48563E-5,1.44438,2.07075E-4  
3438.82631,0.00289,7.07227E-5,1.44439,2.04927E-4  
3437.86197,0.00285,8.00452E-5,1.44442,1.86733E-4  
3436.89763,0.00279,7.31715E-5,1.4444,1.68252E-4  
3435.93329,0.00271,6.39657E-5,1.44435,1.63588E-4  
3434.96896,0.00267,5.92534E-5,1.44425,1.67548E-4  
3434.00462,0.00267,5.26847E-5,1.44416,1.67151E-4

3433.04028,0.00266,5.86117E-5,1.44408,1.69534E-4  
3432.07595,0.00267,5.79393E-5,1.44399,1.79319E-4  
3431.11161,0.00268,4.84056E-5,1.44391,1.8393E-4  
3430.14727,0.00271,4.13785E-5,1.44382,1.84595E-4  
3429.18293,0.00275,4.84536E-5,1.44374,1.95584E-4  
3428.2186,0.00283,6.16477E-5,1.44366,2.06236E-4  
3427.25426,0.00292,6.43864E-5,1.44367,1.98224E-4  
3426.28992,0.00289,5.46619E-5,1.44369,1.96626E-4  
3425.32559,0.00287,5.78674E-5,1.44362,1.9909E-4  
3424.36125,0.00285,6.53034E-5,1.44352,2.05124E-4  
3423.39691,0.00293,6.22899E-5,1.44338,2.25263E-4  
3422.43257,0.00308,6.72647E-5,1.44337,2.26426E-4  
3421.46824,0.00313,7.82927E-5,1.44342,2.14879E-4  
3420.5039,0.00311,8.28E-5,1.44344,1.96603E-4  
3419.53956,0.00307,7.35442E-5,1.44341,1.87972E-4  
3418.57523,0.00306,7.43894E-5,1.44332,1.91912E-4  
3417.61089,0.00311,6.82043E-5,1.44325,1.92157E-4  
3416.64655,0.00315,6.42168E-5,1.44322,2.01128E-4  
3415.68221,0.00317,5.6373E-5,1.44318,2.23002E-4  
3414.71788,0.00321,6.25196E-5,1.44313,2.25862E-4  
3413.75354,0.00324,7.59112E-5,1.44311,2.22288E-4  
3412.7892,0.00324,8.46941E-5,1.44306,2.09465E-4  
3411.82487,0.00329,8.12977E-5,1.44298,2.00651E-4  
3410.86053,0.00339,8.51505E-5,1.44299,2.00572E-4  
3409.89619,0.00337,8.26584E-5,1.44302,1.96046E-4  
3408.93185,0.00333,6.995E-5,1.44296,2.02747E-4  
3407.96752,0.00336,7.06636E-5,1.44288,1.99873E-4  
3407.00318,0.00341,6.84704E-5,1.44281,1.99188E-4  
3406.03884,0.00353,7.68379E-5,1.44277,2.07254E-4  
3405.07451,0.0036,8.55837E-5,1.44288,1.8976E-4  
3404.11017,0.00348,7.32539E-5,1.44296,1.82343E-4  
3403.14583,0.00333,7.18037E-5,1.44289,2.01474E-4  
3402.18149,0.00326,6.7058E-5,1.44268,2.19488E-4  
3401.21716,0.00336,7.69762E-5,1.44247,2.20229E-4  
3400.25282,0.00352,8.7939E-5,1.44242,2.0515E-4  
3399.28848,0.00359,8.4872E-5,1.44241,1.97275E-4  
3398.32415,0.00368,8.82611E-5,1.44237,1.90958E-4  
3397.35981,0.00377,8.14703E-5,1.44243,1.7487E-4  
3396.39547,0.00372,6.82539E-5,1.44247,1.79521E-4  
3395.43113,0.00369,6.7168E-5,1.44238,2.06516E-4  
3394.4668,0.00376,7.96787E-5,1.44234,2.15183E-4  
3393.50246,0.00375,8.47671E-5,1.4424,1.98435E-4  
3392.53812,0.00359,7.62848E-5,1.44233,1.86776E-4  
3391.57379,0.00356,7.44917E-5,1.44205,1.98867E-4  
3390.60945,0.00379,7.35788E-5,1.44183,2.11147E-4  
3389.64511,0.00403,7.97116E-5,1.44185,2.17285E-4  
3388.68077,0.00415,9.10665E-5,1.44196,2.18364E-4  
3387.71644,0.00413,9.93093E-5,1.44206,2.02504E-4  
3386.7521,0.00408,9.64114E-5,1.44201,1.96761E-4  
3385.78776,0.00417,9.45544E-5,1.44197,1.94054E-4  
3384.82343,0.00416,1.00364E-4,1.44203,1.91453E-4  
3383.85909,0.00409,1.06278E-4,1.44196,2.17048E-4  
3382.89475,0.00416,9.61876E-5,1.44187,2.4396E-4  
3381.93041,0.00418,9.86427E-5,1.44189,2.35572E-4  
3380.96608,0.00413,9.84448E-5,1.44179,2.23229E-4  
3380.00174,0.00425,9.32939E-5,1.44164,2.29159E-4  
3379.0374,0.0044,1.04084E-4,1.44169,2.21441E-4  
3378.07307,0.00434,1.02412E-4,1.44176,2.05749E-4  
3377.10873,0.00428,9.25959E-5,1.44159,2.17804E-4  
3376.14439,0.00449,1.06709E-4,1.44147,2.1652E-4  
3375.18005,0.00463,1.02532E-4,1.4416,1.92011E-4  
3374.21572,0.00459,9.50793E-5,1.44166,1.98243E-4  
3373.25138,0.00459,1.06022E-4,1.44166,2.13846E-4  
3372.28704,0.00454,1.00878E-4,1.44168,2.31287E-4  
3371.32271,0.00449,9.55555E-5,1.44165,2.3642E-4

3370.35837,0.00439,9.6324E-5,1.44159,2.15204E-4  
3369.39403,0.00435,9.35823E-5,1.44136,2.09224E-4  
3368.42969,0.00449,9.93276E-5,1.44123,2.01315E-4  
3367.46536,0.00453,8.95234E-5,1.4412,1.95698E-4  
3366.50102,0.00452,8.12562E-5,1.44102,2.17226E-4  
3365.53668,0.00475,8.62224E-5,1.44075,2.50589E-4  
3364.57234,0.00516,1.1482E-4,1.4408,2.5807E-4  
3363.60801,0.00528,1.33943E-4,1.4411,2.32091E-4  
3362.64367,0.0052,1.24036E-4,1.4412,2.15183E-4  
3361.67933,0.00517,1.17593E-4,1.44123,1.99724E-4  
3360.715,0.00507,1.07972E-4,1.44122,1.88569E-4  
3359.75066,0.00505,1.0025E-4,1.44104,2.02078E-4  
3358.78632,0.00525,1.11388E-4,1.44092,2.23748E-4  
3357.82198,0.00543,1.31444E-4,1.44105,2.19692E-4  
3356.85765,0.00537,1.2431E-4,1.44121,2.01244E-4  
3355.89331,0.00527,1.09814E-4,1.44113,2.05211E-4  
3354.92897,0.00539,1.13384E-4,1.44102,2.14259E-4  
3353.96464,0.00551,1.17565E-4,1.44115,2.16718E-4  
3353.0003,0.00542,1.11152E-4,1.4413,2.18196E-4  
3352.03596,0.00523,1.08819E-4,1.44131,2.09513E-4  
3351.07162,0.00504,1.13424E-4,1.44111,2.08449E-4  
3350.10729,0.00512,1.19511E-4,1.4408,2.11918E-4  
3349.14295,0.00536,1.2138E-4,1.44071,2.11265E-4  
3348.17861,0.00548,1.14886E-4,1.44078,2.22962E-4  
3347.21428,0.0055,1.16909E-4,1.44078,2.31087E-4  
3346.24994,0.0056,1.31944E-4,1.44075,2.27862E-4  
3345.2856,0.00568,1.38363E-4,1.44088,2.23935E-4  
3344.32126,0.00551,1.18073E-4,1.44097,2.37472E-4  
3343.35693,0.00539,1.0017E-4,1.44075,2.56902E-4  
3342.39259,0.00559,1.20841E-4,1.44056,2.43053E-4  
3341.42825,0.00578,1.28897E-4,1.44069,2.24304E-4  
3340.46392,0.00571,1.1874E-4,1.44085,2.28632E-4  
3339.49958,0.00552,1.15165E-4,1.44084,2.21E-4  
3338.53524,0.00537,1.16402E-4,1.44063,2.15034E-4  
3337.5709,0.00548,1.24425E-4,1.44034,2.3114E-4  
3336.60657,0.00573,1.38887E-4,1.44027,2.32448E-4  
3335.64223,0.00584,1.45568E-4,1.44034,2.11926E-4  
3334.67789,0.00586,1.38422E-4,1.44038,2.04953E-4  
3333.71356,0.00583,1.32268E-4,1.44036,2.17296E-4  
3332.74922,0.00587,1.34031E-4,1.44024,2.33613E-4  
3331.78488,0.00601,1.41479E-4,1.44021,2.33095E-4  
3330.82054,0.00605,1.3356E-4,1.44027,2.36037E-4  
3329.85621,0.00604,1.29829E-4,1.44024,2.579E-4  
3328.89187,0.00614,1.36968E-4,1.44018,2.62947E-4  
3327.92753,0.00627,1.39882E-4,1.44033,2.30441E-4  
3326.9632,0.00606,1.26184E-4,1.44052,2.11939E-4  
3325.99886,0.00575,1.26081E-4,1.44027,2.25316E-4  
3325.03452,0.00592,1.28618E-4,1.43986,2.42637E-4  
3324.07018,0.00627,1.43189E-4,1.4399,2.30538E-4  
3323.10585,0.00625,1.36224E-4,1.4401,2.13556E-4  
3322.14151,0.00611,1.36732E-4,1.44001,2.17314E-4  
3321.17717,0.00616,1.60037E-4,1.43984,2.43943E-4  
3320.21284,0.00628,1.62179E-4,1.43976,2.72321E-4  
3319.2485,0.00641,1.58473E-4,1.43973,2.71835E-4  
3318.28416,0.00651,1.5982E-4,1.43981,2.47634E-4  
3317.31982,0.00644,1.49764E-4,1.43986,2.38848E-4  
3316.35549,0.00641,1.51756E-4,1.43975,2.55566E-4  
3315.39115,0.00649,1.62876E-4,1.43971,2.69854E-4  
3314.42681,0.00648,1.63722E-4,1.43966,2.81633E-4  
3313.46248,0.00658,1.51499E-4,1.43951,3.04216E-4  
3312.49814,0.00681,1.57118E-4,1.43959,2.89674E-4  
3311.5338,0.00673,1.53759E-4,1.43979,2.73589E-4  
3310.56946,0.00658,1.44641E-4,1.43971,2.96231E-4  
3309.60513,0.0066,1.47451E-4,1.43965,2.83942E-4  
3308.64079,0.00649,1.42295E-4,1.43963,2.54416E-4

3307.67645,0.00639,1.46347E-4,1.43942,2.66252E-4  
3306.71212,0.00643,1.57536E-4,1.4392,2.68562E-4  
3305.74778,0.00647,1.56658E-4,1.43899,2.53E-4  
3304.78344,0.00668,1.57999E-4,1.43867,2.48895E-4  
3303.8191,0.00714,1.74047E-4,1.4386,2.45132E-4  
3302.85477,0.00739,1.82578E-4,1.43887,2.35592E-4  
3301.89043,0.00731,1.853E-4,1.43903,2.34171E-4  
3300.92609,0.00727,1.98477E-4,1.43895,2.7142E-4  
3299.96176,0.00741,1.85444E-4,1.43887,3.19222E-4  
3298.99742,0.00757,1.7943E-4,1.43897,3.08308E-4  
3298.03308,0.0075,1.77929E-4,1.43909,2.93051E-4  
3297.06874,0.00743,1.83817E-4,1.43902,2.88715E-4  
3296.10441,0.00746,1.87255E-4,1.43898,2.70729E-4  
3295.14007,0.00742,1.83039E-4,1.43889,2.63221E-4  
3294.17573,0.00754,1.97157E-4,1.43875,2.50334E-4  
3293.2114,0.00764,2.06575E-4,1.43883,2.35066E-4  
3292.24706,0.00751,1.90082E-4,1.43875,2.22491E-4  
3291.28272,0.00765,1.78258E-4,1.43847,2.19386E-4  
3290.31838,0.00795,1.9084E-4,1.43847,2.37129E-4  
3289.35405,0.00802,2.04637E-4,1.4386,2.51439E-4  
3288.38971,0.00806,2.08873E-4,1.43858,2.5981E-4  
3287.42537,0.00813,2.19842E-4,1.4386,2.61505E-4  
3286.46104,0.00812,2.20782E-4,1.43857,2.81535E-4  
3285.4967,0.00824,2.06942E-4,1.43845,3.0259E-4  
3284.53236,0.00848,2.17869E-4,1.43849,3.1564E-4  
3283.56802,0.0086,2.30213E-4,1.43869,3.18376E-4  
3282.60369,0.00849,2.15177E-4,1.4389,2.84614E-4  
3281.63935,0.00823,2.12342E-4,1.43887,2.83462E-4  
3280.67501,0.00816,2.21208E-4,1.43857,3.21968E-4  
3279.71068,0.00839,2.22199E-4,1.43834,3.41678E-4  
3278.74634,0.00868,2.28018E-4,1.43838,3.39031E-4  
3277.782,0.0088,2.15054E-4,1.43856,3.3487E-4  
3276.81766,0.00878,2.10107E-4,1.43873,3.43001E-4  
3275.85333,0.00861,2.24411E-4,1.43881,3.25283E-4  
3274.88899,0.00847,2.20028E-4,1.43865,2.85381E-4  
3273.92465,0.00858,2.13346E-4,1.43849,2.86284E-4  
3272.96031,0.00862,2.11046E-4,1.43857,3.12107E-4  
3271.99598,0.00844,2.16728E-4,1.43851,3.29426E-4  
3271.03164,0.00837,2.07979E-4,1.43823,3.33546E-4  
3270.0673,0.00849,1.93683E-4,1.43789,3.24805E-4  
3269.10297,0.00886,2.08131E-4,1.43763,3.23839E-4  
3268.13863,0.00928,2.24547E-4,1.43769,3.29586E-4  
3267.17429,0.00949,2.33432E-4,1.43787,3.26875E-4  
3266.20995,0.00961,2.43597E-4,1.438,3.24998E-4  
3265.24562,0.00972,2.44584E-4,1.43813,3.30146E-4  
3264.28128,0.00978,2.44652E-4,1.43831,3.02016E-4  
3263.31694,0.00967,2.37402E-4,1.43848,2.85466E-4  
3262.35261,0.00951,2.40553E-4,1.43842,3.06915E-4  
3261.38827,0.0096,2.43336E-4,1.43823,3.30641E-4  
3260.42393,0.00984,2.49306E-4,1.43831,3.40847E-4  
3259.45959,0.0098,2.37505E-4,1.43853,3.51094E-4  
3258.49526,0.00969,2.14866E-4,1.43851,3.62554E-4  
3257.53092,0.0097,2.17418E-4,1.43852,3.65164E-4  
3256.56658,0.00955,2.20589E-4,1.4385,3.64457E-4  
3255.60225,0.00957,2.22616E-4,1.43824,3.45429E-4  
3254.63791,0.00983,2.24954E-4,1.43822,3.18852E-4  
3253.67357,0.00985,2.16771E-4,1.43837,3.13789E-4  
3252.70923,0.0098,2.126E-4,1.43834,3.19906E-4  
3251.7449,0.00982,2.18083E-4,1.43832,3.28449E-4  
3250.78056,0.0098,2.29529E-4,1.43828,3.56632E-4  
3249.81622,0.00987,2.23479E-4,1.43818,4.07596E-4  
3248.85189,0.00999,2.13607E-4,1.43823,4.37827E-4  
3247.88755,0.0099,2.33107E-4,1.43831,3.95993E-4  
3246.92321,0.0098,2.26029E-4,1.43814,3.28285E-4  
3245.95887,0.00996,2.05032E-4,1.43794,3.21515E-4

3244.99454,0.01017,2.00981E-4,1.43796,3.38988E-4  
3244.0302,0.01021,2.13856E-4,1.43804,3.4935E-4  
3243.06586,0.01026,2.26085E-4,1.43801,3.80086E-4  
3242.10153,0.01038,2.20673E-4,1.43805,4.00769E-4  
3241.13719,0.0104,2.1132E-4,1.43815,3.88625E-4  
3240.17285,0.01034,2.03977E-4,1.43821,3.67562E-4  
3239.20851,0.01023,2.1934E-4,1.43816,3.71393E-4  
3238.24418,0.01025,2.21479E-4,1.43799,4.04054E-4  
3237.27984,0.0104,2.04489E-4,1.43796,4.16737E-4  
3236.3155,0.01045,2.1009E-4,1.43802,4.07841E-4  
3235.35117,0.01043,2.30194E-4,1.43805,3.93205E-4  
3234.38683,0.01033,2.3292E-4,1.43804,3.60703E-4  
3233.42249,0.01023,2.1842E-4,1.43781,3.27142E-4  
3232.45815,0.01045,2.15873E-4,1.43756,3.29938E-4  
3231.49382,0.0107,2.20757E-4,1.43761,3.46875E-4  
3230.52948,0.01075,2.0594E-4,1.43765,3.58331E-4  
3229.56514,0.0109,2.09858E-4,1.43764,3.61713E-4  
3228.60081,0.01098,2.36737E-4,1.43776,3.68564E-4  
3227.63647,0.01098,2.43495E-4,1.43781,4.07681E-4  
3226.67213,0.01099,2.17243E-4,1.43789,4.34063E-4  
3225.70779,0.01088,1.91368E-4,1.43791,4.20736E-4  
3224.74346,0.01087,1.86182E-4,1.43779,3.94784E-4  
3223.77912,0.01091,1.9962E-4,1.43782,3.90883E-4  
3222.81478,0.01076,2.03424E-4,1.43773,4.41206E-4  
3221.85045,0.01086,2.01448E-4,1.43745,4.77847E-4  
3220.88611,0.0111,2.10814E-4,1.43745,4.77268E-4  
3219.92177,0.01113,2.18432E-4,1.43748,4.67991E-4  
3218.95743,0.01124,2.34616E-4,1.4374,4.45124E-4  
3217.9931,0.01141,2.3809E-4,1.43747,4.253E-4  
3217.02876,0.01141,2.28122E-4,1.43762,3.97831E-4  
3216.06442,0.0113,2.07543E-4,1.43763,3.90677E-4  
3215.10009,0.01123,2.03977E-4,1.43752,4.10941E-4  
3214.13575,0.01129,2.13657E-4,1.43734,4.3099E-4  
3213.17141,0.01148,2.20173E-4,1.43726,4.49521E-4  
3212.20707,0.01163,2.27916E-4,1.43731,4.58269E-4  
3211.24274,0.01169,2.47718E-4,1.43737,4.41314E-4  
3210.2784,0.0117,2.41678E-4,1.43738,4.1893E-4  
3209.31406,0.01182,2.34356E-4,1.43737,4.11955E-4  
3208.34973,0.01185,2.28869E-4,1.43754,4.00044E-4  
3207.38539,0.01166,2.06715E-4,1.43754,4.02828E-4  
3206.42105,0.01167,2.1363E-4,1.43731,4.30194E-4  
3205.45671,0.01186,2.36846E-4,1.43726,4.30665E-4  
3204.49238,0.01196,2.39565E-4,1.43731,4.20545E-4  
3203.52804,0.01201,2.39812E-4,1.43739,4.1337E-4  
3202.5637,0.01194,2.35219E-4,1.43744,3.99497E-4  
3201.59937,0.01192,2.1976E-4,1.43736,3.98523E-4  
3200.63503,0.01193,2.09112E-4,1.43736,4.12208E-4  
3199.67069,0.01189,2.09372E-4,1.43723,4.3603E-4  
3198.70635,0.01207,2.25455E-4,1.43712,4.46644E-4  
3197.74202,0.01219,2.32245E-4,1.43723,4.35965E-4  
3196.77768,0.01214,2.21769E-4,1.43731,4.22773E-4  
3195.81334,0.01204,2.13293E-4,1.43726,4.20371E-4  
3194.84901,0.01204,2.28638E-4,1.43707,4.49923E-4  
3193.88467,0.01222,2.41339E-4,1.43697,4.71459E-4  
3192.92033,0.01233,2.29103E-4,1.43703,4.58549E-4  
3191.95599,0.01237,2.20528E-4,1.43705,4.60213E-4  
3190.99166,0.01241,2.33586E-4,1.43708,4.71517E-4  
3190.02732,0.01239,2.52087E-4,1.4371,4.69784E-4  
3189.06298,0.01237,2.58026E-4,1.43706,4.48211E-4  
3188.09865,0.01236,2.43763E-4,1.437,4.42932E-4  
3187.13431,0.01238,2.3912E-4,1.43691,4.61652E-4  
3186.16997,0.01245,2.4601E-4,1.4368,4.74571E-4  
3185.20563,0.0126,2.58678E-4,1.43677,4.80976E-4  
3184.2413,0.01264,2.74866E-4,1.43685,4.65449E-4  
3183.27696,0.01262,2.78484E-4,1.43677,4.44006E-4

3182.31262,0.01276,2.75836E-4,1.43674,4.24808E-4  
3181.34828,0.01275,2.54616E-4,1.43682,4.2111E-4  
3180.38395,0.0127,2.50843E-4,1.43668,4.47866E-4  
3179.41961,0.01289,2.77298E-4,1.43658,4.56951E-4  
3178.45527,0.01301,2.78868E-4,1.43669,4.34871E-4  
3177.49094,0.01295,2.59362E-4,1.43677,4.22993E-4  
3176.5266,0.0129,2.5524E-4,1.43667,4.35627E-4  
3175.56226,0.01303,2.57346E-4,1.43659,4.44818E-4  
3174.59792,0.01307,2.59059E-4,1.43667,4.43094E-4  
3173.63359,0.01302,2.64896E-4,1.43662,4.6147E-4  
3172.66925,0.01309,2.76599E-4,1.43657,4.74046E-4  
3171.70491,0.01309,2.83754E-4,1.43653,4.75217E-4  
3170.74058,0.01322,2.99501E-4,1.43642,4.68504E-4  
3169.77624,0.01338,3.03137E-4,1.43656,4.48686E-4  
3168.8119,0.01326,2.9127E-4,1.43668,4.50233E-4  
3167.84756,0.01314,2.91127E-4,1.43664,4.37874E-4  
3166.88323,0.01302,2.67376E-4,1.43651,4.33089E-4  
3165.91889,0.01306,2.65553E-4,1.43627,4.76432E-4  
3164.95455,0.0132,2.84786E-4,1.43617,5.04802E-4  
3163.99022,0.01328,2.94859E-4,1.43606,4.91781E-4  
3163.02588,0.01349,3.02928E-4,1.43595,4.84068E-4  
3162.06154,0.01374,3.23986E-4,1.43603,4.76068E-4  
3161.0972,0.01384,3.43209E-4,1.43624,4.59039E-4  
3160.13287,0.01375,3.36211E-4,1.43643,4.43286E-4  
3159.16853,0.01358,3.14205E-4,1.43648,4.37736E-4  
3158.20419,0.01337,3.03246E-4,1.43643,4.4191E-4  
3157.23986,0.01326,3.04533E-4,1.43618,4.62716E-4  
3156.27552,0.01336,3.15296E-4,1.43603,4.6887E-4  
3155.31118,0.01332,3.17761E-4,1.43594,4.75175E-4  
3154.34684,0.01339,3.48219E-4,1.43573,4.95233E-4  
3153.38251,0.01347,3.87425E-4,1.43572,4.62358E-4  
3152.41817,0.01334,3.70701E-4,1.43551,4.22834E-4  
3151.45383,0.01357,3.41294E-4,1.43515,4.30149E-4  
3150.4895,0.01391,3.35318E-4,1.43511,4.39282E-4  
3149.52516,0.01407,3.34946E-4,1.43514,4.376E-4  
3148.56082,0.01425,3.31063E-4,1.43516,4.42461E-4  
3147.59648,0.01434,3.33683E-4,1.43525,4.46259E-4  
3146.63215,0.0144,3.50201E-4,1.43523,4.59146E-4  
3145.66781,0.01456,3.74208E-4,1.43527,4.48209E-4  
3144.70347,0.0146,3.64823E-4,1.43542,4.23656E-4  
3143.73914,0.01449,3.43998E-4,1.43548,4.29422E-4  
3142.7748,0.01443,3.48658E-4,1.43535,4.56491E-4  
3141.81046,0.01461,3.82935E-4,1.43528,4.70222E-4  
3140.84612,0.01462,4.18172E-4,1.43551,4.33423E-4  
3139.88179,0.01429,4.06835E-4,1.43548,3.99163E-4  
3138.91745,0.0142,3.69713E-4,1.43512,3.99513E-4  
3137.95311,0.01435,3.4157E-4,1.43487,4.18843E-4  
3136.98878,0.01452,3.34501E-4,1.43472,4.48123E-4  
3136.02444,0.01472,3.46185E-4,1.4346,4.62959E-4  
3135.0601,0.01498,3.56358E-4,1.43461,4.55117E-4  
3134.09576,0.01508,3.50939E-4,1.43475,4.34584E-4  
3133.13143,0.01504,3.42071E-4,1.43471,4.52229E-4  
3132.16709,0.01526,3.72195E-4,1.4346,4.94964E-4  
3131.20275,0.01541,4.25046E-4,1.43488,4.82391E-4  
3130.23842,0.01509,4.28154E-4,1.43497,4.41443E-4  
3129.27408,0.01503,3.96518E-4,1.43459,4.29585E-4  
3128.30974,0.01536,3.91535E-4,1.43447,4.29477E-4  
3127.3454,0.0155,3.94612E-4,1.43463,4.13691E-4  
3126.38107,0.01542,3.63875E-4,1.43472,4.12395E-4  
3125.41673,0.01533,3.50347E-4,1.43463,4.57091E-4  
3124.45239,0.01537,3.83112E-4,1.43447,4.87417E-4  
3123.48806,0.01553,4.22902E-4,1.43441,4.821E-4  
3122.52372,0.01557,4.49298E-4,1.43454,4.59866E-4  
3121.55938,0.01532,4.44445E-4,1.43452,4.38814E-4  
3120.59504,0.01522,4.29497E-4,1.43412,4.44995E-4

3119.63071,0.01551,4.28341E-4,1.43379,4.60904E-4  
3118.66637,0.01582,4.55424E-4,1.43377,4.71698E-4  
3117.70203,0.01594,4.92453E-4,1.43383,4.46835E-4  
3116.7377,0.01598,4.75224E-4,1.43377,4.03956E-4  
3115.77336,0.01616,4.50902E-4,1.43362,3.98371E-4  
3114.80902,0.01645,4.52213E-4,1.43363,3.94346E-4  
3113.84468,0.01662,4.22279E-4,1.43381,3.79264E-4  
3112.88035,0.01663,3.94981E-4,1.43396,3.83061E-4  
3111.91601,0.01654,3.81937E-4,1.43406,4.01859E-4  
3110.95167,0.01641,3.91177E-4,1.43398,4.39623E-4  
3109.98734,0.01641,4.43893E-4,1.43383,4.50319E-4  
3109.023,0.0164,4.63305E-4,1.43367,4.06345E-4  
3108.05866,0.01659,4.25159E-4,1.43334,3.93311E-4  
3107.09432,0.01709,4.13384E-4,1.43332,3.94565E-4  
3106.12999,0.01732,4.15837E-4,1.43367,3.77332E-4  
3105.16565,0.01723,4.00228E-4,1.43392,3.78682E-4  
3104.20131,0.01709,4.03571E-4,1.43397,3.95846E-4  
3103.23698,0.01703,4.22693E-4,1.43395,4.01792E-4  
3102.27264,0.01695,4.2692E-4,1.43396,4.1341E-4  
3101.3083,0.0168,4.29443E-4,1.43385,4.23508E-4  
3100.34396,0.01676,4.31547E-4,1.43362,4.04577E-4  
3099.37963,0.01687,4.07171E-4,1.43339,4.00311E-4  
3098.41529,0.01708,3.98551E-4,1.43327,4.26237E-4  
3097.45095,0.01725,4.26968E-4,1.43332,4.25855E-4  
3096.48661,0.01726,4.28126E-4,1.43334,4.06294E-4  
3095.52228,0.01735,4.14408E-4,1.43326,4.01933E-4  
3094.55794,0.01748,4.15254E-4,1.43333,3.90915E-4  
3093.5936,0.01744,3.96529E-4,1.43341,4.02304E-4  
3092.62927,0.01738,4.08421E-4,1.4334,4.39332E-4  
3091.66493,0.01728,4.62148E-4,1.43337,4.48884E-4  
3090.70059,0.01715,4.87484E-4,1.43319,4.26365E-4  
3089.73625,0.01721,4.69457E-4,1.43288,4.17338E-4  
3088.77192,0.01747,4.58626E-4,1.43275,4.19225E-4  
3087.80758,0.0176,4.68516E-4,1.43277,4.15263E-4  
3086.84324,0.01774,4.87759E-4,1.43275,4.15592E-4  
3085.87891,0.01784,5.13742E-4,1.43292,4.07628E-4  
3084.91457,0.01762,5.07058E-4,1.43304,3.85956E-4  
3083.95023,0.01742,4.74033E-4,1.43283,3.72108E-4  
3082.98589,0.01745,4.39283E-4,1.43261,3.87252E-4  
3082.02156,0.01746,4.2936E-4,1.43248,4.01582E-4  
3081.05722,0.01748,4.472E-4,1.43228,3.99218E-4  
3080.09288,0.01755,4.49077E-4,1.43212,3.88325E-4  
3079.12855,0.01759,4.40921E-4,1.43191,3.90726E-4  
3078.16421,0.01777,4.42768E-4,1.43166,4.03554E-4  
3077.19987,0.01806,4.44542E-4,1.43156,3.94776E-4  
3076.23553,0.01828,4.44279E-4,1.43164,3.80895E-4  
3075.2712,0.01827,4.37787E-4,1.43176,3.6992E-4  
3074.30686,0.01814,4.18891E-4,1.43162,3.61991E-4  
3073.34252,0.01829,4.10081E-4,1.43139,3.83914E-4  
3072.37819,0.0185,4.26055E-4,1.43139,4.04877E-4  
3071.41385,0.01854,4.4668E-4,1.43144,4.00773E-4  
3070.44951,0.01854,4.60729E-4,1.43145,4.03473E-4  
3069.48517,0.01838,4.75285E-4,1.43141,4.13858E-4  
3068.52084,0.01831,4.82468E-4,1.43109,4.19014E-4  
3067.5565,0.01852,4.77624E-4,1.43087,3.9882E-4  
3066.59216,0.01861,4.42421E-4,1.43085,3.79115E-4  
3065.62783,0.01861,4.09628E-4,1.43069,3.78117E-4  
3064.66349,0.01873,4.05186E-4,1.43048,3.94446E-4  
3063.69915,0.01891,4.1039E-4,1.43036,4.05962E-4  
3062.73481,0.01905,4.09279E-4,1.43034,3.98129E-4  
3061.77048,0.01906,4.07566E-4,1.43029,3.93497E-4  
3060.80614,0.01912,4.08552E-4,1.43011,4.05312E-4  
3059.8418,0.01928,4.10998E-4,1.42997,4.20927E-4  
3058.87747,0.01945,4.28246E-4,1.42995,4.23016E-4  
3057.91313,0.01946,4.47455E-4,1.42999,4.13838E-4

3056.94879,0.01942,4.47996E-4,1.42985,4.14797E-4  
3055.98445,0.01948,4.37423E-4,1.42973,4.16027E-4  
3055.02012,0.01945,4.26071E-4,1.42956,4.14354E-4  
3054.05578,0.01963,4.27732E-4,1.42929,4.23212E-4  
3053.09144,0.01986,4.48564E-4,1.42932,4.20494E-4  
3052.12711,0.01979,4.76847E-4,1.42933,4.16378E-4  
3051.16277,0.01973,4.88237E-4,1.42916,4.09093E-4  
3050.19843,0.0197,4.35679E-4,1.42894,4.09948E-4  
3049.23409,0.01975,3.83088E-4,1.42857,4.22205E-4  
3048.26976,0.0201,3.93731E-4,1.42827,4.45663E-4  
3047.30542,0.02042,4.33461E-4,1.42834,4.45661E-4  
3046.34108,0.02036,4.60642E-4,1.42842,4.42459E-4  
3045.37675,0.02032,4.76709E-4,1.42817,4.46052E-4  
3044.41241,0.02052,4.8463E-4,1.42801,4.49214E-4  
3043.44807,0.02049,5.0825E-4,1.428,4.54607E-4  
3042.48373,0.02044,5.14242E-4,1.42764,4.64456E-4  
3041.5194,0.02075,4.73228E-4,1.42738,4.47233E-4  
3040.55506,0.02088,4.24187E-4,1.42736,4.19647E-4  
3039.59072,0.02095,3.96141E-4,1.42716,4.28074E-4  
3038.62639,0.02116,4.03652E-4,1.42706,4.42036E-4  
3037.66205,0.02119,4.33973E-4,1.42709,4.52875E-4  
3036.69771,0.02104,4.5448E-4,1.42696,4.56624E-4  
3035.73337,0.02094,4.53436E-4,1.42656,4.50834E-4  
3034.76904,0.02114,4.39004E-4,1.42612,4.61016E-4  
3033.8047,0.02143,4.41946E-4,1.42592,4.65184E-4  
3032.84036,0.02155,4.43309E-4,1.42577,4.50259E-4  
3031.87603,0.02168,4.1873E-4,1.42553,4.39232E-4  
3030.91169,0.02186,4.23565E-4,1.42534,4.55028E-4  
3029.94735,0.02195,4.49727E-4,1.42521,4.69076E-4  
3028.98301,0.02197,4.31933E-4,1.42496,4.61846E-4  
3028.01868,0.0221,4.18086E-4,1.42465,4.65714E-4  
3027.05434,0.0222,4.21668E-4,1.42443,4.79483E-4  
3026.09,0.02218,4.34486E-4,1.42408,4.87682E-4  
3025.12567,0.02232,4.75689E-4,1.42352,4.97826E-4  
3024.16133,0.02271,4.78112E-4,1.42308,5.09917E-4  
3023.19699,0.02303,4.60135E-4,1.42285,5.07037E-4  
3022.23265,0.02319,4.63043E-4,1.42251,5.02636E-4  
3021.26832,0.02351,4.7083E-4,1.42202,5.10045E-4  
3020.30398,0.02392,4.76658E-4,1.42165,5.1578E-4  
3019.33964,0.02435,4.75081E-4,1.42125,5.24787E-4  
3018.37531,0.02488,4.8761E-4,1.42097,5.31824E-4  
3017.41097,0.02525,4.97307E-4,1.42075,5.3555E-4  
3016.44663,0.02567,5.01396E-4,1.42032,5.49695E-4  
3015.48229,0.02631,5.18288E-4,1.41991,5.57865E-4  
3014.51796,0.02708,5.25782E-4,1.41958,5.51489E-4  
3013.55362,0.02802,5.15474E-4,1.41946,5.39382E-4  
3012.58928,0.02883,5.00287E-4,1.41963,5.29465E-4  
3011.62495,0.02949,5.04782E-4,1.41976,5.37624E-4  
3010.66061,0.03033,5.08658E-4,1.41988,5.53756E-4  
3009.69627,0.03122,5.03351E-4,1.42042,5.40142E-4  
3008.73193,0.0317,5.08537E-4,1.42121,5.13049E-4  
3007.7676,0.03187,5.05816E-4,1.42182,5.07575E-4  
3006.80326,0.03209,4.94793E-4,1.42226,5.15601E-4  
3005.83892,0.03237,5.15107E-4,1.4229,5.22704E-4  
3004.87458,0.03226,5.38812E-4,1.4237,5.26996E-4  
3003.91025,0.03195,5.36795E-4,1.42418,5.41103E-4  
3002.94591,0.03177,5.48179E-4,1.42469,5.38757E-4  
3001.98157,0.03118,5.36461E-4,1.42535,5.18416E-4  
3001.01724,0.03028,4.90752E-4,1.42549,5.23761E-4  
3000.0529,0.02964,4.71455E-4,1.42535,5.35811E-4  
2999.08856,0.02899,4.81643E-4,1.42521,5.58156E-4  
2998.12422,0.02833,5.18171E-4,1.4248,5.86253E-4  
2997.15989,0.02791,5.32952E-4,1.4243,5.90225E-4  
2996.19555,0.02751,5.11086E-4,1.42394,5.85175E-4  
2995.23121,0.0269,4.97423E-4,1.42347,5.83926E-4



2994.26688,0.02632,5.09366E-4,1.42264,5.86821E-4  
2993.30254,0.02602,5.31632E-4,1.42164,5.82312E-4  
2992.3382,0.02598,5.28962E-4,1.42063,5.62514E-4  
2991.37386,0.02611,4.9812E-4,1.4198,5.6409E-4  
2990.40953,0.02611,4.78113E-4,1.4191,5.97919E-4  
2989.44519,0.02603,4.84156E-4,1.41819,6.12423E-4  
2988.48085,0.02621,4.93397E-4,1.41715,5.95329E-4  
2987.51652,0.02656,4.79336E-4,1.41627,5.92253E-4  
2986.55218,0.02686,4.77677E-4,1.41552,6.22661E-4  
2985.58784,0.02707,4.94263E-4,1.41478,6.42333E-4  
2984.6235,0.02722,4.92019E-4,1.41391,6.60072E-4  
2983.65917,0.02746,5.10067E-4,1.41295,7.00356E-4  
2982.69483,0.02771,5.38111E-4,1.41194,7.28743E-4  
2981.73049,0.0281,5.5166E-4,1.41074,7.43957E-4  
2980.76616,0.02872,5.7875E-4,1.40961,7.36413E-4  
2979.80182,0.02932,5.75451E-4,1.40854,7.3065E-4  
2978.83748,0.03006,5.62046E-4,1.40736,7.58419E-4  
2977.87314,0.03101,5.81005E-4,1.40631,7.93698E-4  
2976.90881,0.03192,6.12234E-4,1.40543,8.06554E-4  
2975.94447,0.03272,6.4604E-4,1.40454,8.05874E-4  
2974.98013,0.03355,6.70785E-4,1.40349,8.02025E-4  
2974.0158,0.03456,6.53369E-4,1.40239,8.07073E-4  
2973.05146,0.03566,6.35974E-4,1.40131,8.22559E-4  
2972.08712,0.03689,6.38208E-4,1.40021,8.60418E-4  
2971.12278,0.03826,6.55765E-4,1.39921,9.12378E-4  
2970.15845,0.03962,7.05876E-4,1.39819,9.57547E-4  
2969.19411,0.04125,7.79144E-4,1.39702,9.62537E-4  
2968.22977,0.0432,8.28034E-4,1.39611,9.40895E-4  
2967.26544,0.04516,8.67194E-4,1.39538,9.35101E-4  
2966.3011,0.04738,9.15397E-4,1.39471,9.21395E-4  
2965.33676,0.04981,9.43867E-4,1.39453,8.93145E-4  
2964.37242,0.05196,9.7848E-4,1.39476,8.99279E-4  
2963.40809,0.05384,0.00104,1.39496,8.87759E-4  
2962.44375,0.05588,0.00109,1.39508,8.47457E-4  
2961.47941,0.05809,0.00114,1.39564,8.07366E-4  
2960.51508,0.05991,0.00117,1.39659,7.47375E-4  
2959.55074,0.06143,0.00117,1.39753,7.00642E-4  
2958.5864,0.06277,0.00117,1.39854,6.9201E-4  
2957.62206,0.06382,0.00118,1.39958,6.98611E-4  
2956.65773,0.06458,0.0012,1.40056,6.8357E-4  
2955.69339,0.06509,0.0012,1.40136,6.51322E-4  
2954.72905,0.06546,0.0012,1.40204,6.62683E-4  
2953.76472,0.06541,0.00124,1.40248,6.52982E-4  
2952.80038,0.06531,0.00127,1.4022,6.00141E-4  
2951.83604,0.06565,0.00128,1.40169,5.67044E-4  
2950.8717,0.06591,0.00127,1.40116,5.48968E-4  
2949.90737,0.06619,0.00128,1.4001,5.57288E-4  
2948.94303,0.06686,0.00132,1.39877,5.71628E-4  
2947.97869,0.06768,0.00136,1.39719,5.38282E-4  
2947.01436,0.06904,0.00136,1.39507,5.13151E-4  
2946.05002,0.07131,0.00138,1.39306,5.36016E-4  
2945.08568,0.07384,0.00144,1.39145,5.55022E-4  
2944.12134,0.07662,0.00151,1.38971,5.48659E-4  
2943.15701,0.08011,0.00157,1.38813,5.32901E-4  
2942.19267,0.08393,0.00164,1.38698,5.10295E-4  
2941.22833,0.08808,0.0017,1.386,5.06428E-4  
2940.264,0.09273,0.00175,1.38544,5.19399E-4  
2939.29966,0.09764,0.00179,1.38544,5.33941E-4  
2938.33532,0.1027,0.00185,1.3859,5.37904E-4  
2937.37098,0.10787,0.00189,1.38682,5.53447E-4  
2936.40665,0.11318,0.00192,1.38802,6.05283E-4  
2935.44231,0.119,0.00194,1.38967,6.9588E-4  
2934.47797,0.12508,0.00196,1.39233,7.87386E-4  
2933.51364,0.13098,0.00192,1.39583,8.96091E-4  
2932.5493,0.13677,0.00187,1.40011,9.82608E-4

2931.58496,0.14211,0.00186,1.40534,0.00103  
2930.62062,0.14674,0.00185,1.41095,0.00107  
2929.65629,0.15145,0.00181,1.41677,0.00113  
2928.69195,0.15626,0.00179,1.42393,0.00115  
2927.72761,0.15976,0.00176,1.43252,0.00117  
2926.76328,0.16176,0.00168,1.4413,0.00123  
2925.79894,0.16294,0.00164,1.45019,0.00127  
2924.8346,0.1631,0.00163,1.45953,0.00128  
2923.87026,0.16183,0.00158,1.46907,0.00128  
2922.90593,0.15898,0.0015,1.4783,0.0013  
2921.94159,0.15484,0.00139,1.48669,0.00135  
2920.97725,0.14978,0.00128,1.49423,0.00139  
2920.01292,0.14376,0.0012,1.5008,0.00144  
2919.04858,0.1371,0.00115,1.50598,0.00143  
2918.08424,0.13035,0.00105,1.50981,0.00135  
2917.1199,0.12381,9.24934E-4,1.51249,0.00131  
2916.15557,0.11765,8.67611E-4,1.51436,0.0013  
2915.19123,0.11174,8.6058E-4,1.51549,0.00125  
2914.22689,0.10636,8.99821E-4,1.51578,0.00118  
2913.26255,0.10185,8.6536E-4,1.51578,0.00112  
2912.29822,0.09764,7.34951E-4,1.51597,0.0011  
2911.33388,0.09329,7.22666E-4,1.5158,0.00105  
2910.36954,0.08946,7.27931E-4,1.51498,9.84737E-4  
2909.40521,0.08636,6.77503E-4,1.51422,9.55398E-4  
2908.44087,0.08341,6.60664E-4,1.51367,9.46041E-4  
2907.47653,0.08056,6.55817E-4,1.51302,9.18329E-4  
2906.51219,0.07795,6.25016E-4,1.51234,8.86892E-4  
2905.54786,0.0754,6.32949E-4,1.51165,8.67862E-4  
2904.58352,0.07296,6.85185E-4,1.51069,8.13838E-4  
2903.61918,0.07105,6.39047E-4,1.50963,7.4782E-4  
2902.65485,0.06947,5.9563E-4,1.50902,7.17736E-4  
2901.69051,0.06758,6.35401E-4,1.50871,7.30475E-4  
2900.72617,0.06542,6.50384E-4,1.5081,7.33325E-4  
2899.76183,0.06352,5.94633E-4,1.50719,6.95178E-4  
2898.7975,0.06185,5.34652E-4,1.50636,6.67045E-4  
2897.83316,0.06016,5.68573E-4,1.50557,6.46686E-4  
2896.86882,0.05848,6.4101E-4,1.50463,6.28162E-4  
2895.90449,0.05701,6.62548E-4,1.5035,6.21951E-4  
2894.94015,0.05594,5.98925E-4,1.50248,6.01923E-4  
2893.97581,0.05483,5.2061E-4,1.50188,5.86974E-4  
2893.01147,0.0534,4.92201E-4,1.50124,5.971E-4  
2892.04714,0.05191,4.78503E-4,1.50036,5.77732E-4  
2891.0828,0.05046,4.74912E-4,1.4993,5.5624E-4  
2890.11846,0.04917,5.11897E-4,1.49803,5.42156E-4  
2889.15413,0.0481,5.16765E-4,1.49674,5.25428E-4  
2888.18979,0.04712,4.76295E-4,1.49547,5.0537E-4  
2887.22545,0.04619,4.76025E-4,1.49413,4.61736E-4  
2886.26111,0.04541,5.17114E-4,1.49273,4.24019E-4  
2885.29678,0.04473,5.22046E-4,1.49134,4.12686E-4  
2884.33244,0.04411,4.97929E-4,1.48987,3.99926E-4  
2883.3681,0.04365,4.95221E-4,1.48835,4.03371E-4  
2882.40377,0.04329,5.19136E-4,1.48679,4.05848E-4  
2881.43943,0.04311,5.36615E-4,1.48515,4.06137E-4  
2880.47509,0.04315,5.40086E-4,1.48352,4.12437E-4  
2879.51075,0.04333,5.43249E-4,1.48194,4.13635E-4  
2878.54642,0.04365,5.40832E-4,1.48031,3.99324E-4  
2877.58208,0.04426,5.41377E-4,1.47865,3.63962E-4  
2876.61774,0.0452,5.40178E-4,1.4772,3.46127E-4  
2875.65341,0.04624,5.50279E-4,1.47598,3.29151E-4  
2874.68907,0.04745,6.0739E-4,1.47487,3.12255E-4  
2873.72473,0.04892,6.41836E-4,1.47414,3.38406E-4  
2872.76039,0.05019,5.77151E-4,1.474,3.92886E-4  
2871.79606,0.05082,5.12863E-4,1.47395,3.76017E-4  
2870.83172,0.05126,5.11985E-4,1.47348,3.27763E-4  
2869.86738,0.05171,5.43034E-4,1.4729,3.18785E-4

2868.90305,0.05193,5.65613E-4,1.47195,3.39405E-4  
2867.93871,0.05249,6.00485E-4,1.47025,3.33843E-4  
2866.97437,0.0539,6.39989E-4,1.46837,3.36569E-4  
2866.01003,0.05583,6.41266E-4,1.46667,3.6852E-4  
2865.0457,0.05826,6.27845E-4,1.46497,3.78649E-4  
2864.08136,0.06149,6.29766E-4,1.4634,3.70693E-4  
2863.11702,0.06554,6.89978E-4,1.46251,3.71797E-4  
2862.15269,0.06991,7.57151E-4,1.46247,4.14764E-4  
2861.18835,0.07451,7.82772E-4,1.46293,4.7354E-4  
2860.22401,0.07981,7.97668E-4,1.4641,5.41871E-4  
2859.25967,0.08561,7.86161E-4,1.46679,6.13938E-4  
2858.29534,0.091,7.77241E-4,1.47117,6.35914E-4  
2857.331,0.09557,7.77713E-4,1.4768,6.72213E-4  
2856.36666,0.09922,7.80709E-4,1.48361,7.27725E-4  
2855.40233,0.10147,7.63385E-4,1.49151,7.73464E-4  
2854.43799,0.10198,7.42738E-4,1.50006,8.13522E-4  
2853.47365,0.10046,7.23038E-4,1.50878,8.7996E-4  
2852.50931,0.09687,6.48731E-4,1.51676,9.40053E-4  
2851.54498,0.09195,5.93948E-4,1.52341,9.56334E-4  
2850.58064,0.08617,5.90458E-4,1.52892,9.91548E-4  
2849.6163,0.0795,5.76825E-4,1.53302,1E-3  
2848.65197,0.07262,6.05222E-4,1.5353,9.48849E-4  
2847.68763,0.06634,6.25472E-4,1.53614,9.00842E-4  
2846.72329,0.06083,5.89798E-4,1.53624,8.6061E-4  
2845.75895,0.05574,5.55609E-4,1.53597,8.15677E-4  
2844.79462,0.05089,5.18243E-4,1.53513,7.82536E-4  
2843.83028,0.04656,4.81656E-4,1.53371,7.66156E-4  
2842.86594,0.04277,4.62581E-4,1.53189,7.44229E-4  
2841.90161,0.03971,4.47886E-4,1.52977,6.90984E-4  
2840.93727,0.03724,4.46285E-4,1.5279,6.59546E-4  
2839.97293,0.03477,4.73842E-4,1.52598,6.47553E-4  
2839.00859,0.03288,5.09098E-4,1.52358,6.19513E-4  
2838.04426,0.03193,4.93158E-4,1.52155,5.96921E-4  
2837.07992,0.03107,4.35019E-4,1.52023,5.73923E-4  
2836.11558,0.03,4.16094E-4,1.51911,5.57059E-4  
2835.15125,0.02885,4.0488E-4,1.51794,5.74143E-4  
2834.18691,0.02785,3.64871E-4,1.51667,5.70438E-4  
2833.22257,0.02703,3.66797E-4,1.51549,5.4413E-4  
2832.25823,0.02626,3.72277E-4,1.51446,5.46464E-4  
2831.2939,0.02549,3.46481E-4,1.51345,5.27332E-4  
2830.32956,0.0248,3.48607E-4,1.51243,4.86347E-4  
2829.36522,0.02418,3.55053E-4,1.51156,4.90719E-4  
2828.40089,0.02345,3.40497E-4,1.51065,4.92244E-4  
2827.43655,0.02291,3.37054E-4,1.50962,4.59928E-4  
2826.47221,0.02254,3.32224E-4,1.5088,4.41738E-4  
2825.50787,0.02207,3.30935E-4,1.50812,4.34651E-4  
2824.54354,0.02152,3.51371E-4,1.50749,4.57125E-4  
2823.5792,0.0208,3.38456E-4,1.50675,4.96962E-4  
2822.61486,0.02023,3.09716E-4,1.50569,4.66224E-4  
2821.65052,0.02005,2.96143E-4,1.50472,4.12716E-4  
2820.68619,0.0199,2.96288E-4,1.50407,4.04842E-4  
2819.72185,0.01959,2.91822E-4,1.50344,4.14377E-4  
2818.75751,0.0194,2.91542E-4,1.5028,4.07102E-4  
2817.79318,0.01912,3.01477E-4,1.50232,4.00643E-4  
2816.82884,0.01875,3.02641E-4,1.50168,4.01373E-4  
2815.8645,0.01862,3.01963E-4,1.50103,4.07486E-4  
2814.90016,0.01845,2.80254E-4,1.50062,4.19285E-4  
2813.93583,0.01818,2.66504E-4,1.50017,4.18508E-4  
2812.97149,0.01789,2.67491E-4,1.49977,4.25413E-4  
2812.00715,0.01745,2.64756E-4,1.49932,4.16945E-4  
2811.04282,0.01703,2.65906E-4,1.49862,3.88437E-4  
2810.07848,0.0169,2.66223E-4,1.49782,3.73601E-4  
2809.11414,0.01703,2.62676E-4,1.49728,3.72797E-4  
2808.1498,0.01698,2.58218E-4,1.49708,3.74393E-4  
2807.18547,0.0166,2.55654E-4,1.49673,3.57166E-4

2806.22113,0.01635,2.60361E-4,1.49609,3.2845E-4  
2805.25679,0.01641,2.53292E-4,1.49554,3.1739E-4  
2804.29246,0.01644,2.39737E-4,1.49533,3.20694E-4  
2803.32812,0.01616,2.57949E-4,1.49512,3.24114E-4  
2802.36378,0.01587,2.66763E-4,1.49468,3.21821E-4  
2801.39944,0.01571,2.49552E-4,1.49424,3.03191E-4  
2800.43511,0.01557,2.605E-4,1.49385,2.83865E-4  
2799.47077,0.01536,2.73338E-4,1.49347,2.97962E-4  
2798.50643,0.01517,2.62624E-4,1.49289,2.99012E-4  
2797.5421,0.01534,2.61294E-4,1.49235,2.76918E-4  
2796.57776,0.01545,2.73183E-4,1.49222,2.77188E-4  
2795.61342,0.01529,2.81312E-4,1.49206,2.95325E-4  
2794.64908,0.01511,2.67464E-4,1.49181,3.24532E-4  
2793.68475,0.01488,2.42157E-4,1.49149,3.22875E-4  
2792.72041,0.01475,2.29857E-4,1.49105,2.88693E-4  
2791.75607,0.01471,2.38152E-4,1.4907,2.6576E-4  
2790.79174,0.01466,2.49239E-4,1.49042,2.7341E-4  
2789.8274,0.01453,2.67271E-4,1.49014,2.94183E-4  
2788.86306,0.01442,2.64435E-4,1.48976,3.19765E-4  
2787.89872,0.01447,2.47189E-4,1.48943,3.23555E-4  
2786.93439,0.0144,2.39791E-4,1.48929,3.16534E-4  
2785.97005,0.01413,2.29378E-4,1.48892,2.86165E-4  
2785.00571,0.01421,2.24688E-4,1.48833,2.26667E-4  
2784.04138,0.01457,2.51285E-4,1.48814,2.12533E-4  
2783.07704,0.01457,2.73196E-4,1.48826,2.53092E-4  
2782.1127,0.01432,2.73715E-4,1.48812,2.79986E-4  
2781.14836,0.01425,2.63647E-4,1.48786,3.05526E-4  
2780.18403,0.01418,2.42554E-4,1.48775,3.28596E-4  
2779.21969,0.01396,2.16201E-4,1.48759,3.17839E-4  
2778.25535,0.01381,2.29948E-4,1.48727,2.72672E-4  
2777.29102,0.01377,2.45939E-4,1.48706,2.73026E-4  
2776.32668,0.01355,2.42985E-4,1.48689,2.91504E-4  
2775.36234,0.01333,2.34739E-4,1.48647,2.78845E-4  
2774.398,0.01339,2.31876E-4,1.48605,2.6817E-4  
2773.43367,0.01344,2.2582E-4,1.48585,2.81309E-4  
2772.46933,0.01336,2.16971E-4,1.4856,2.77961E-4  
2771.50499,0.0134,2.11349E-4,1.48526,2.46092E-4  
2770.54066,0.01353,2.12336E-4,1.48507,2.3213E-4  
2769.57632,0.01355,2.26298E-4,1.48501,2.44052E-4  
2768.61198,0.01344,2.24979E-4,1.4849,2.68512E-4  
2767.64764,0.01334,2.19541E-4,1.48466,2.66486E-4  
2766.68331,0.01334,2.25576E-4,1.48442,2.4095E-4  
2765.71897,0.01332,2.22694E-4,1.48426,2.32158E-4  
2764.75463,0.01328,2.27455E-4,1.48403,2.21858E-4  
2763.7903,0.01335,2.45355E-4,1.48383,2.31969E-4  
2762.82596,0.01337,2.30668E-4,1.48377,2.61473E-4  
2761.86162,0.01327,2.18415E-4,1.48368,2.58331E-4  
2760.89728,0.01313,2.19459E-4,1.48351,2.52282E-4  
2759.93295,0.01306,2.15649E-4,1.48324,2.45394E-4  
2758.96861,0.01309,2.13887E-4,1.48306,2.35526E-4  
2758.00427,0.01301,2.21182E-4,1.4829,2.23768E-4  
2757.03994,0.01299,2.1742E-4,1.48266,2.1888E-4  
2756.0756,0.013,2.01656E-4,1.48249,2.19922E-4  
2755.11126,0.01295,1.97476E-4,1.48228,2.09494E-4  
2754.14692,0.01301,2.05634E-4,1.48204,2.00772E-4  
2753.18259,0.01313,2.1213E-4,1.48191,1.93742E-4  
2752.21825,0.01319,2.1449E-4,1.48189,2.02605E-4  
2751.25391,0.01307,2.17392E-4,1.48189,2.11954E-4  
2750.28958,0.01288,2.21626E-4,1.4817,2.02474E-4  
2749.32524,0.01286,2.20771E-4,1.48142,1.99124E-4  
2748.3609,0.01285,2.16863E-4,1.48124,2.05596E-4  
2747.39656,0.01287,2.17048E-4,1.48096,2.03881E-4  
2746.43223,0.01306,2.17267E-4,1.4808,2.06043E-4  
2745.46789,0.0131,2.1633E-4,1.48084,2.05147E-4  
2744.50355,0.01298,2.18029E-4,1.48072,1.81267E-4

2743.53922,0.013,2.17952E-4,1.4805,1.7002E-4  
2742.57488,0.01308,2.35467E-4,1.48039,1.73181E-4  
2741.61054,0.01309,2.42812E-4,1.48033,1.92207E-4  
2740.6462,0.01305,2.27785E-4,1.48021,2.0905E-4  
2739.68187,0.01307,2.26001E-4,1.48007,1.97907E-4  
2738.71753,0.01308,2.24642E-4,1.47996,1.88838E-4  
2737.75319,0.01312,2.23594E-4,1.4798,1.78923E-4  
2736.78885,0.01326,2.32669E-4,1.47973,1.73942E-4  
2735.82452,0.01331,2.45045E-4,1.47983,1.92545E-4  
2734.86018,0.01314,2.44088E-4,1.4799,2.25841E-4  
2733.89584,0.0129,2.22876E-4,1.47973,2.29462E-4  
2732.93151,0.01286,2.16649E-4,1.47942,1.94068E-4  
2731.96717,0.01298,2.24182E-4,1.47922,1.75389E-4  
2731.00283,0.01312,2.28503E-4,1.47917,1.79847E-4  
2730.03849,0.01315,2.29239E-4,1.47924,1.84671E-4  
2729.07416,0.013,2.30371E-4,1.47927,2.01853E-4  
2728.10982,0.01279,2.22853E-4,1.47914,2.09148E-4  
2727.14548,0.01266,2.15362E-4,1.47881,1.73747E-4  
2726.18115,0.01286,2.25302E-4,1.47846,1.48441E-4  
2725.21681,0.01313,2.36943E-4,1.47848,1.73675E-4  
2724.25247,0.01313,2.36668E-4,1.47859,1.82154E-4  
2723.28813,0.01305,2.55018E-4,1.4786,1.77229E-4  
2722.3238,0.01292,2.61859E-4,1.47851,2.12112E-4  
2721.35946,0.01292,2.30448E-4,1.47837,2.48294E-4  
2720.39512,0.0129,2.07286E-4,1.47836,2.38313E-4  
2719.43079,0.01278,1.96532E-4,1.47825,2.07939E-4  
2718.46645,0.01273,1.97632E-4,1.47814,1.94705E-4  
2717.50211,0.01259,2.04916E-4,1.478,1.95796E-4  
2716.53777,0.01255,2.09925E-4,1.47769,1.87049E-4  
2715.57344,0.01268,2.17819E-4,1.47745,1.77585E-4  
2714.6091,0.01284,2.2736E-4,1.47734,1.64389E-4  
2713.64476,0.01295,2.16257E-4,1.47732,1.60779E-4  
2712.68043,0.013,2.15777E-4,1.47728,1.53543E-4  
2711.71609,0.01311,2.32662E-4,1.47733,1.72705E-4  
2710.75175,0.01295,2.25377E-4,1.47751,2.04274E-4  
2709.78741,0.01259,2.00279E-4,1.47732,1.94996E-4  
2708.82308,0.01257,1.93357E-4,1.47687,1.55077E-4  
2707.85874,0.01282,2.08162E-4,1.47663,1.38908E-4  
2706.8944,0.01299,2.21922E-4,1.47662,1.47599E-4  
2705.93007,0.01306,2.28063E-4,1.47659,1.50649E-4  
2704.96573,0.01317,2.47408E-4,1.47662,1.62183E-4  
2704.00139,0.01304,2.45978E-4,1.47671,1.88206E-4  
2703.03705,0.01288,2.27142E-4,1.4765,1.83534E-4  
2702.07272,0.01299,2.22225E-4,1.47631,1.77596E-4  
2701.10838,0.01301,2.10135E-4,1.47627,1.82045E-4  
2700.14404,0.01296,2.03338E-4,1.4761,1.65101E-4  
2699.17971,0.01306,2.17366E-4,1.47588,1.52419E-4  
2698.21537,0.01325,2.31699E-4,1.47574,1.44761E-4  
2697.25103,0.01345,2.452E-4,1.47571,1.39945E-4  
2696.28669,0.01358,2.59174E-4,1.47577,1.5165E-4  
2695.32236,0.01363,2.52396E-4,1.47585,1.77437E-4  
2694.35802,0.01356,2.40586E-4,1.47591,1.95803E-4  
2693.39368,0.01346,2.27259E-4,1.47577,1.98682E-4  
2692.42935,0.01359,2.2004E-4,1.47559,1.90884E-4  
2691.46501,0.01375,2.22347E-4,1.47565,2.00057E-4  
2690.50067,0.01368,2.19321E-4,1.47571,2.03761E-4  
2689.53633,0.01361,2.17681E-4,1.47555,1.70477E-4  
2688.572,0.01375,2.23078E-4,1.47535,1.35245E-4  
2687.60766,0.01398,2.33646E-4,1.47534,1.47495E-4  
2686.64332,0.01409,2.41828E-4,1.47543,1.75168E-4  
2685.67899,0.01412,2.39318E-4,1.47549,1.77478E-4  
2684.71465,0.01415,2.27105E-4,1.4755,1.67119E-4  
2683.75031,0.01422,2.24384E-4,1.47555,1.63824E-4  
2682.78597,0.01418,2.32585E-4,1.47565,1.68988E-4  
2681.82164,0.01406,2.43334E-4,1.47561,1.61139E-4

2680.8573,0.01405,2.3152E-4,1.47547,1.62961E-4  
2679.89296,0.01413,2.11007E-4,1.47532,1.49014E-4  
2678.92863,0.01437,2.27996E-4,1.47526,1.34981E-4  
2677.96429,0.01449,2.56688E-4,1.47543,1.4811E-4  
2676.99995,0.01445,2.40373E-4,1.47543,1.59062E-4  
2676.03561,0.01465,2.42103E-4,1.4754,1.43619E-4  
2675.07128,0.01477,2.67679E-4,1.47566,1.58489E-4  
2674.10694,0.01463,2.60926E-4,1.4758,1.86285E-4  
2673.1426,0.01458,2.43833E-4,1.47577,1.80959E-4  
2672.17827,0.0146,2.36017E-4,1.4758,1.74426E-4  
2671.21393,0.0146,2.27484E-4,1.47584,1.78556E-4  
2670.24959,0.01463,2.20915E-4,1.47588,1.78488E-4  
2669.28525,0.01462,2.19688E-4,1.47602,1.76794E-4  
2668.32092,0.01449,2.27077E-4,1.47607,1.65422E-4  
2667.35658,0.01443,2.35155E-4,1.476,1.59527E-4  
2666.39224,0.01448,2.22051E-4,1.47596,1.6237E-4  
2665.42791,0.01458,2.15921E-4,1.47604,1.58972E-4  
2664.46357,0.01456,2.32786E-4,1.47623,1.72039E-4  
2663.49923,0.01438,2.27187E-4,1.47632,1.87466E-4  
2662.53489,0.01424,2.07027E-4,1.47626,1.63144E-4  
2661.57056,0.01425,2.23795E-4,1.47615,1.37898E-4  
2660.60622,0.01435,2.53124E-4,1.47622,1.45437E-4  
2659.64188,0.01424,2.2926E-4,1.47637,1.6668E-4  
2658.67755,0.01411,2.2011E-4,1.4763,1.52514E-4  
2657.71321,0.01417,2.40021E-4,1.47628,1.52489E-4  
2656.74887,0.01412,2.44027E-4,1.4764,1.68205E-4  
2655.78453,0.01397,2.39641E-4,1.4764,1.69912E-4  
2654.8202,0.0139,2.30109E-4,1.47636,1.74872E-4  
2653.85586,0.01386,2.27109E-4,1.47632,1.73822E-4  
2652.89152,0.01384,2.26084E-4,1.47628,1.63994E-4  
2651.92719,0.01383,2.24144E-4,1.47626,1.49298E-4  
2650.96285,0.01387,2.34741E-4,1.47625,1.51014E-4  
2649.99851,0.01388,2.37478E-4,1.47636,1.83686E-4  
2649.03417,0.01378,2.21634E-4,1.47641,1.93267E-4  
2648.06984,0.01373,2.16836E-4,1.47643,1.78901E-4  
2647.1055,0.01363,2.21865E-4,1.47647,1.75923E-4  
2646.14116,0.01355,2.31746E-4,1.47642,1.73526E-4  
2645.17682,0.01357,2.34093E-4,1.47645,1.87391E-4  
2644.21249,0.01344,2.16987E-4,1.47656,2.02287E-4  
2643.24815,0.01324,2.05673E-4,1.47651,1.90936E-4  
2642.28381,0.01314,2.07677E-4,1.47639,1.77833E-4  
2641.31948,0.01309,2.10008E-4,1.47626,1.68678E-4  
2640.35514,0.01316,2.11689E-4,1.47615,1.62084E-4  
2639.3908,0.01323,2.1109E-4,1.47619,1.65381E-4  
2638.42646,0.01316,2.07829E-4,1.47623,1.67794E-4  
2637.46213,0.01314,2.0881E-4,1.47617,1.63448E-4  
2636.49779,0.01317,2.13436E-4,1.47621,1.66976E-4  
2635.53345,0.01309,2.19165E-4,1.47627,1.71191E-4  
2634.56912,0.01302,2.19842E-4,1.47626,1.7458E-4  
2633.60478,0.01293,2.11652E-4,1.47626,1.69016E-4  
2632.64044,0.01287,2.02863E-4,1.47613,1.52234E-4  
2631.6761,0.01299,2.15274E-4,1.47612,1.4402E-4  
2630.71177,0.01295,2.24516E-4,1.47627,1.60265E-4  
2629.74743,0.0128,2.23657E-4,1.47627,1.65858E-4  
2628.78309,0.01274,2.23897E-4,1.47623,1.76811E-4  
2627.81876,0.01268,2.17605E-4,1.47624,1.98357E-4  
2626.85442,0.01256,2.06807E-4,1.47624,2.01786E-4  
2625.89008,0.01243,1.93753E-4,1.47614,1.81549E-4  
2624.92574,0.01242,1.8964E-4,1.47598,1.53442E-4  
2623.96141,0.01251,1.98191E-4,1.47593,1.4485E-4  
2622.99707,0.01251,2.06417E-4,1.476,1.51645E-4  
2622.03273,0.01239,1.98795E-4,1.47601,1.57276E-4  
2621.0684,0.0123,1.90341E-4,1.4759,1.45185E-4  
2620.10406,0.01232,1.91531E-4,1.47573,1.3991E-4  
2619.13972,0.01251,2.09102E-4,1.47563,1.39736E-4

2618.17538,0.01269,2.2921E-4,1.47582,1.49902E-4  
2617.21105,0.01258,2.3647E-4,1.47605,1.68518E-4  
2616.24671,0.01239,2.27704E-4,1.47611,1.77238E-4  
2615.28237,0.01217,2.05285E-4,1.47606,1.72383E-4  
2614.31804,0.01208,2.02803E-4,1.47586,1.48481E-4  
2613.3537,0.01216,2.17391E-4,1.47575,1.42295E-4  
2612.38936,0.01219,2.24126E-4,1.47572,1.47806E-4  
2611.42502,0.01226,2.34399E-4,1.47568,1.50116E-4  
2610.46069,0.01233,2.34115E-4,1.47576,1.61741E-4  
2609.49635,0.01232,2.38291E-4,1.47585,1.65694E-4  
2608.53201,0.01227,2.52362E-4,1.47595,1.84164E-4  
2607.56768,0.01214,2.28119E-4,1.47601,2.18409E-4  
2606.60334,0.01204,2.00045E-4,1.47601,2.25224E-4  
2605.639,0.01187,1.775E-4,1.47601,2.10338E-4  
2604.67466,0.01175,1.80725E-4,1.47582,1.57838E-4  
2603.71033,0.01185,1.99366E-4,1.47567,1.36735E-4  
2602.74599,0.01196,2.17764E-4,1.4757,1.45384E-4  
2601.78165,0.01196,2.21376E-4,1.4758,1.66374E-4  
2600.81732,0.01189,2.1662E-4,1.47585,1.85984E-4  
2599.85298,0.01184,2.19072E-4,1.47586,1.87443E-4  
2598.88864,0.0118,2.12602E-4,1.47593,2.00704E-4  
2597.9243,0.01164,1.93121E-4,1.476,2.11448E-4  
2596.95997,0.01145,1.84801E-4,1.47592,1.80805E-4  
2595.99563,0.01136,1.90212E-4,1.47577,1.53191E-4  
2595.03129,0.01135,2.02218E-4,1.47564,1.61322E-4  
2594.06696,0.01139,1.97369E-4,1.47555,1.8196E-4  
2593.10262,0.01145,1.94633E-4,1.47551,1.84605E-4  
2592.13828,0.01148,1.91286E-4,1.47551,1.73802E-4  
2591.17394,0.01152,1.91496E-4,1.47554,1.56426E-4  
2590.20961,0.01151,2.07173E-4,1.47564,1.59623E-4  
2589.24527,0.01137,2.15601E-4,1.47569,1.81387E-4  
2588.28093,0.01123,1.9839E-4,1.4756,1.87305E-4  
2587.3166,0.01124,1.90371E-4,1.47545,1.69806E-4  
2586.35226,0.01132,1.96058E-4,1.47543,1.69518E-4  
2585.38792,0.01132,1.93854E-4,1.47546,1.66337E-4  
2584.42358,0.01133,2.01114E-4,1.47545,1.50075E-4  
2583.45925,0.01137,2.2447E-4,1.47552,1.56526E-4  
2582.49491,0.01125,2.26323E-4,1.47561,1.84146E-4  
2581.53057,0.01114,2.11713E-4,1.47554,2.00849E-4  
2580.56624,0.01114,2.00271E-4,1.47548,2.01188E-4  
2579.6019,0.01116,1.97116E-4,1.47546,1.97998E-4  
2578.63756,0.01117,1.90522E-4,1.47552,2.13465E-4  
2577.67322,0.01103,1.77801E-4,1.47559,2.09912E-4  
2576.70889,0.01088,1.76886E-4,1.47545,1.69882E-4  
2575.74455,0.01096,1.79926E-4,1.47523,1.50559E-4  
2574.78021,0.01119,2.00667E-4,1.47527,1.58415E-4  
2573.81588,0.01119,2.05488E-4,1.47549,1.83617E-4  
2572.85154,0.01104,2.03265E-4,1.47556,1.89462E-4  
2571.8872,0.01091,1.92493E-4,1.47553,1.81639E-4  
2570.92286,0.01086,1.85616E-4,1.47539,1.5823E-4  
2569.95853,0.011,1.986E-4,1.47532,1.55492E-4  
2568.99419,0.01106,2.02831E-4,1.47546,1.72337E-4  
2568.02985,0.01099,1.98132E-4,1.47553,1.69754E-4  
2567.06552,0.01093,2.00052E-4,1.47556,1.72881E-4  
2566.10118,0.01091,2.07268E-4,1.47557,1.78832E-4  
2565.13684,0.01088,2.07191E-4,1.47565,1.92115E-4  
2564.1725,0.01075,1.89854E-4,1.47571,2.01222E-4  
2563.20817,0.01062,1.83582E-4,1.47565,1.83982E-4  
2562.24383,0.01058,1.87433E-4,1.47555,1.66737E-4  
2561.27949,0.01065,1.95214E-4,1.47549,1.67278E-4  
2560.31516,0.0107,2.00419E-4,1.47559,1.80368E-4  
2559.35082,0.01062,1.87875E-4,1.47564,1.91952E-4  
2558.38648,0.0106,1.84959E-4,1.47562,1.85453E-4  
2557.42214,0.01063,1.91267E-4,1.47569,1.87225E-4  
2556.45781,0.01059,1.89886E-4,1.47585,2.03041E-4

2555.49347,0.01035,1.78351E-4,1.47597,2.07427E-4  
2554.52913,0.01013,1.70276E-4,1.4758,1.89077E-4  
2553.56479,0.01023,1.83809E-4,1.47565,1.79832E-4  
2552.60046,0.01028,1.96782E-4,1.47578,1.93739E-4  
2551.63612,0.01011,1.86308E-4,1.47587,2.05942E-4  
2550.67178,0.00998,1.81005E-4,1.47576,1.9376E-4  
2549.70745,0.01004,1.83906E-4,1.47569,1.8148E-4  
2548.74311,0.01003,1.77726E-4,1.47582,1.87615E-4  
2547.77877,0.00983,1.68976E-4,1.47583,1.83244E-4  
2546.81443,0.0098,1.79142E-4,1.47567,1.7259E-4  
2545.8501,0.00989,1.86092E-4,1.47569,1.77358E-4  
2544.88576,0.00983,1.88004E-4,1.47581,1.78351E-4  
2543.92142,0.0097,1.79779E-4,1.47578,1.82355E-4  
2542.95709,0.00974,1.89933E-4,1.47573,1.78196E-4  
2541.99275,0.00974,1.99734E-4,1.47589,1.9057E-4  
2541.02841,0.00957,1.94705E-4,1.476,2.08346E-4  
2540.06407,0.00935,1.79504E-4,1.47604,2.32882E-4  
2539.09974,0.00906,1.67381E-4,1.47587,2.11752E-4  
2538.1354,0.00906,1.62358E-4,1.47553,1.58663E-4  
2537.17106,0.00932,1.71464E-4,1.47543,1.52971E-4  
2536.20673,0.0095,1.95099E-4,1.4756,1.65188E-4  
2535.24239,0.00943,1.96719E-4,1.47586,1.8954E-4  
2534.27805,0.0092,1.85935E-4,1.47594,2.11086E-4  
2533.31371,0.00907,1.74552E-4,1.4759,2.23965E-4  
2532.34938,0.009,1.61642E-4,1.47588,2.19655E-4  
2531.38504,0.00896,1.55148E-4,1.4759,2.07215E-4  
2530.4207,0.00885,1.5566E-4,1.47601,2.14745E-4  
2529.45637,0.00859,1.59873E-4,1.47604,2.14363E-4  
2528.49203,0.00839,1.61568E-4,1.47585,1.89774E-4  
2527.52769,0.00839,1.58372E-4,1.4757,1.74068E-4  
2526.56335,0.00839,1.5612E-4,1.47568,1.82347E-4  
2525.59902,0.00835,1.55666E-4,1.47567,1.82772E-4  
2524.63468,0.00827,1.4994E-4,1.47567,1.86569E-4  
2523.67034,0.00817,1.45274E-4,1.47563,1.88308E-4  
2522.70601,0.00812,1.43894E-4,1.47559,1.79044E-4  
2521.74167,0.008,1.47416E-4,1.47557,1.7409E-4  
2520.77733,0.0079,1.54526E-4,1.47543,1.73678E-4  
2519.81299,0.00794,1.5258E-4,1.47531,1.74118E-4  
2518.84866,0.00798,1.55723E-4,1.47529,1.70289E-4  
2517.88432,0.00802,1.71486E-4,1.47531,1.73803E-4  
2516.91998,0.00798,1.64978E-4,1.47541,1.93457E-4  
2515.95565,0.00784,1.55201E-4,1.47543,1.91453E-4  
2514.99131,0.00776,1.50145E-4,1.47537,1.86469E-4  
2514.02697,0.00771,1.46688E-4,1.47537,1.88184E-4  
2513.06263,0.00761,1.4254E-4,1.47537,1.84313E-4  
2512.0983,0.00752,1.44461E-4,1.47532,1.77197E-4  
2511.13396,0.00744,1.49241E-4,1.47528,1.76959E-4  
2510.16962,0.00734,1.48158E-4,1.47522,1.75582E-4  
2509.20529,0.0073,1.47431E-4,1.47511,1.6817E-4  
2508.24095,0.00733,1.56246E-4,1.47507,1.61689E-4  
2507.27661,0.00729,1.68918E-4,1.47513,1.67192E-4  
2506.31227,0.00713,1.60335E-4,1.47511,1.84763E-4  
2505.34794,0.00705,1.4398E-4,1.47492,1.84828E-4  
2504.3836,0.00719,1.49639E-4,1.47486,1.77221E-4  
2503.41926,0.00718,1.52633E-4,1.47503,1.93296E-4  
2502.45493,0.00695,1.47406E-4,1.47502,1.88533E-4  
2501.49059,0.00689,1.45276E-4,1.47488,1.70764E-4  
2500.52625,0.00687,1.45031E-4,1.47483,1.67555E-4  
2499.56191,0.00684,1.4626E-4,1.47477,1.71547E-4  
2498.59758,0.00687,1.52115E-4,1.47476,1.81106E-4  
2497.63324,0.00684,1.59989E-4,1.47479,1.87507E-4  
2496.6689,0.0068,1.5825E-4,1.47482,2.00054E-4  
2495.70457,0.00671,1.46696E-4,1.47491,2.16575E-4  
2494.74023,0.00648,1.37761E-4,1.47494,2.1505E-4  
2493.77589,0.0063,1.35954E-4,1.4748,2.05036E-4



2492.81155,0.00624,1.32263E-4,1.47468,2.10811E-4  
2491.84722,0.00612,1.22441E-4,1.47462,2.12811E-4  
2490.88288,0.006,1.21787E-4,1.47441,1.84487E-4  
2489.91854,0.00608,1.23747E-4,1.4742,1.6624E-4  
2488.95421,0.0062,1.28747E-4,1.47417,1.6868E-4  
2487.98987,0.0062,1.34294E-4,1.47422,1.73357E-4  
2487.02553,0.00614,1.39093E-4,1.47419,1.73884E-4  
2486.06119,0.00615,1.40434E-4,1.47412,1.73146E-4  
2485.09686,0.0062,1.52762E-4,1.47419,1.82385E-4  
2484.13252,0.00603,1.32973E-4,1.47429,2.02528E-4  
2483.16818,0.00586,1.25532E-4,1.47413,1.80817E-4  
2482.20385,0.00594,1.33175E-4,1.47401,1.74732E-4  
2481.23951,0.00594,1.46649E-4,1.47416,1.90515E-4  
2480.27517,0.00565,1.34755E-4,1.47416,1.93683E-4  
2479.31083,0.0055,1.22691E-4,1.47388,1.69488E-4  
2478.3465,0.00559,1.21449E-4,1.47368,1.56984E-4  
2477.38216,0.0057,1.30797E-4,1.47362,1.57922E-4  
2476.41782,0.00575,1.3893E-4,1.47369,1.62266E-4  
2475.45349,0.00565,1.35308E-4,1.47374,1.63386E-4  
2474.48915,0.00552,1.28856E-4,1.47363,1.57553E-4  
2473.52481,0.00557,1.43784E-4,1.47351,1.63638E-4  
2472.56047,0.00558,1.45785E-4,1.47355,1.86325E-4  
2471.59614,0.00546,1.21295E-4,1.47351,1.82158E-4  
2470.6318,0.00546,1.1939E-4,1.47334,1.5591E-4  
2469.66746,0.00562,1.37969E-4,1.47331,1.54591E-4  
2468.70313,0.00566,1.45266E-4,1.47351,1.79672E-4  
2467.73879,0.0054,1.32483E-4,1.47363,1.99761E-4  
2466.77445,0.00518,1.21503E-4,1.47346,1.96063E-4  
2465.81011,0.00516,1.23464E-4,1.47329,1.84418E-4  
2464.84578,0.00512,1.30419E-4,1.47318,1.62459E-4  
2463.88144,0.00517,1.22155E-4,1.47304,1.48024E-4  
2462.9171,0.00525,1.27618E-4,1.47304,1.47963E-4  
2461.95276,0.00521,1.27655E-4,1.47305,1.5351E-4  
2460.98843,0.00518,1.2642E-4,1.47301,1.52483E-4  
2460.02409,0.00514,1.25069E-4,1.47295,1.60175E-4  
2459.05975,0.00517,1.34857E-4,1.47288,1.68421E-4  
2458.09542,0.00521,1.39817E-4,1.47289,1.76599E-4  
2457.13108,0.00519,1.33258E-4,1.47293,1.82408E-4  
2456.16674,0.00514,1.31442E-4,1.47296,1.77358E-4  
2455.2024,0.00507,1.28889E-4,1.47297,1.74758E-4  
2454.23807,0.00498,1.2341E-4,1.473,1.86348E-4  
2453.27373,0.00477,1.1094E-4,1.47299,1.94368E-4  
2452.30939,0.0046,1.07607E-4,1.47279,1.73748E-4  
2451.34506,0.00463,1.13084E-4,1.47256,1.54669E-4  
2450.38072,0.00473,1.25251E-4,1.47247,1.52115E-4  
2449.41638,0.00478,1.31338E-4,1.47248,1.61701E-4  
2448.45204,0.00478,1.26466E-4,1.4725,1.77483E-4  
2447.48771,0.00468,1.23584E-4,1.47254,1.86216E-4  
2446.52337,0.00452,1.24404E-4,1.47242,1.75394E-4  
2445.55903,0.00456,1.29572E-4,1.47221,1.57395E-4  
2444.5947,0.00468,1.30348E-4,1.4722,1.58592E-4  
2443.63036,0.00464,1.1677E-4,1.47223,1.73568E-4  
2442.66602,0.00457,1.04944E-4,1.47218,1.73082E-4  
2441.70168,0.00456,1.07574E-4,1.47206,1.55404E-4  
2440.73735,0.00468,1.21953E-4,1.47202,1.49599E-4  
2439.77301,0.00467,1.24932E-4,1.47213,1.6525E-4  
2438.80867,0.00453,1.15296E-4,1.47212,1.69103E-4  
2437.84434,0.00445,1.13375E-4,1.47201,1.56009E-4  
2436.88,0.00449,1.1051E-4,1.47187,1.46041E-4  
2435.91566,0.0046,1.21622E-4,1.47191,1.55943E-4  
2434.95132,0.00449,1.23361E-4,1.472,1.73665E-4  
2433.98699,0.00436,1.3025E-4,1.47192,1.67604E-4  
2433.02265,0.00432,1.2065E-4,1.4718,1.68902E-4  
2432.05831,0.00435,1.102E-4,1.47169,1.69836E-4  
2431.09398,0.0044,1.16691E-4,1.4717,1.73471E-4

2430.12964,0.00432,1.12134E-4,1.47171,1.81621E-4  
2429.1653,0.00428,1.16798E-4,1.4716,1.70243E-4  
2428.20096,0.00429,1.20404E-4,1.47153,1.5715E-4  
2427.23663,0.00433,1.23024E-4,1.47145,1.54484E-4  
2426.27229,0.0044,1.32791E-4,1.4715,1.65944E-4  
2425.30795,0.00427,1.13088E-4,1.47155,1.74026E-4  
2424.34362,0.00422,1.0247E-4,1.47137,1.56437E-4  
2423.37928,0.00436,1.15103E-4,1.47134,1.56251E-4  
2422.41494,0.00434,1.13566E-4,1.47147,1.745E-4  
2421.4506,0.00419,1.04939E-4,1.47147,1.76182E-4  
2420.48627,0.00411,1.06671E-4,1.47138,1.66181E-4  
2419.52193,0.00408,1.09585E-4,1.47131,1.64941E-4  
2418.55759,0.00402,1.06833E-4,1.47124,1.66912E-4  
2417.59326,0.00401,1.05533E-4,1.47114,1.61934E-4  
2416.62892,0.00399,1.05758E-4,1.47109,1.57825E-4  
2415.66458,0.00392,1.05038E-4,1.47096,1.4217E-4  
2414.70024,0.00401,1.09772E-4,1.47076,1.29031E-4  
2413.73591,0.00421,1.30225E-4,1.47074,1.30787E-4  
2412.77157,0.00427,1.35237E-4,1.47081,1.44341E-4  
2411.80723,0.00433,1.3977E-4,1.47086,1.52788E-4  
2410.8429,0.00432,1.35671E-4,1.471,1.71169E-4  
2409.87856,0.00418,1.17118E-4,1.47105,1.77651E-4  
2408.91422,0.00409,1.14911E-4,1.47099,1.59743E-4  
2407.94988,0.00407,1.22039E-4,1.47096,1.51413E-4  
2406.98555,0.00403,1.30275E-4,1.47095,1.58905E-4  
2406.02121,0.00396,1.21443E-4,1.47096,1.77378E-4  
2405.05687,0.00379,9.78341E-5,1.47092,1.8414E-4  
2404.09254,0.0037,9.74518E-5,1.47069,1.60858E-4  
2403.1282,0.00385,1.11856E-4,1.47054,1.47593E-4  
2402.16386,0.00393,1.22098E-4,1.47061,1.56993E-4  
2401.19952,0.00384,1.118E-4,1.47062,1.63738E-4  
2400.23519,0.00385,1.07709E-4,1.47053,1.5868E-4  
2399.27085,0.00387,1.10804E-4,1.47057,1.70052E-4  
2398.30651,0.00377,1.07308E-4,1.47057,1.77379E-4  
2397.34218,0.00368,1.00919E-4,1.47046,1.71541E-4  
2396.37784,0.00371,1.02661E-4,1.47033,1.58511E-4  
2395.4135,0.00378,1.03324E-4,1.47032,1.55996E-4  
2394.44916,0.00374,1.10654E-4,1.47035,1.53836E-4  
2393.48483,0.00364,1.07986E-4,1.47026,1.52519E-4  
2392.52049,0.00369,1.13076E-4,1.47009,1.51464E-4  
2391.55615,0.00383,1.34594E-4,1.47008,1.59763E-4  
2390.59182,0.00384,1.32913E-4,1.47017,1.81706E-4  
2389.62748,0.00376,1.13788E-4,1.47015,1.81488E-4  
2388.66314,0.00379,1.10578E-4,1.4701,1.64896E-4  
2387.6988,0.0038,1.123E-4,1.47015,1.72364E-4  
2386.73447,0.0037,1.1452E-4,1.47016,1.75929E-4  
2385.77013,0.00363,1.19163E-4,1.47009,1.72914E-4  
2384.80579,0.0036,1.30206E-4,1.47002,1.84218E-4  
2383.84146,0.00355,1.23718E-4,1.46993,2.07741E-4  
2382.87712,0.00361,1.09074E-4,1.4698,2.05576E-4  
2381.91278,0.0037,1.10763E-4,1.4698,1.79328E-4  
2380.94844,0.00372,1.25347E-4,1.46977,1.6896E-4  
2379.98411,0.00384,1.3088E-4,1.46982,1.98494E-4  
2379.01977,0.00373,1.10814E-4,1.46996,1.97608E-4  
2378.05543,0.00364,1.19239E-4,1.46984,2.03358E-4  
2377.09109,0.00373,1.07412E-4,1.46989,2.57129E-4  
2376.12676,0.00358,1.05066E-4,1.46996,2.44604E-4  
2375.16242,0.00347,1.15396E-4,1.4699,2.29663E-4  
2374.19808,0.00331,1.53534E-4,1.46979,2.04845E-4  
2373.23375,0.00337,1.40739E-4,1.46951,1.59688E-4  
2372.26941,0.00354,1.1101E-4,1.46954,1.6423E-4  
2371.30507,0.0035,1.16136E-4,1.4695,2.10954E-4  
2370.34073,0.00371,1.18514E-4,1.46949,2.40192E-4  
2369.3764,0.00367,1.27076E-4,1.46982,2.13822E-4  
2368.41206,0.00325,1.22257E-4,1.46982,2.19957E-4

2367.44772,0.00309,1.7883E-4,1.4694,2.10547E-4  
2366.48339,0.00339,2.12831E-4,1.46906,1.65002E-4  
2365.51905,0.00384,1.64029E-4,1.46922,1.56599E-4  
2364.55471,0.00379,1.35352E-4,1.46967,1.46768E-4  
2363.59037,0.00348,1.07135E-4,1.46968,1.45854E-4  
2362.62604,0.00347,1.04173E-4,1.46959,1.44305E-4  
2361.6617,0.0035,1.21589E-4,1.46969,1.63632E-4  
2360.69736,0.00335,1.33491E-4,1.46992,2.09319E-4  
2359.73303,0.00287,1.32859E-4,1.46994,2.45855E-4  
2358.76869,0.0026,1.79986E-4,1.46958,1.91287E-4  
2357.80435,0.00253,1.84593E-4,1.46929,1.51458E-4  
2356.84001,0.00253,1.67245E-4,1.46895,1.41781E-4  
2355.87568,0.00274,1.25079E-4,1.46868,1.53457E-4  
2354.91134,0.00297,1.10007E-4,1.46865,1.43929E-4  
2353.947,0.00305,1.11946E-4,1.46866,1.37639E-4  
2352.98267,0.00312,1.4504E-4,1.46864,1.34759E-4  
2352.01833,0.00321,1.34031E-4,1.46863,1.85694E-4  
2351.05399,0.00332,1.05602E-4,1.46871,2.26746E-4  
2350.08965,0.00325,1.18356E-4,1.46884,2.28872E-4  
2349.12532,0.00311,1.63234E-4,1.46878,1.9907E-4  
2348.16098,0.00314,2.03071E-4,1.46868,1.57698E-4  
2347.19664,0.00317,1.93287E-4,1.46871,1.27473E-4  
2346.23231,0.00305,1.37339E-4,1.46869,1.30255E-4  
2345.26797,0.00306,1.00531E-4,1.46846,1.44539E-4  
2344.30363,0.00336,1.01791E-4,1.46843,1.66392E-4  
2343.33929,0.00345,1.52976E-4,1.46877,1.81211E-4  
2342.37496,0.00309,2.01533E-4,1.46899,1.4163E-4  
2341.41062,0.00272,1.73313E-4,1.46871,1.39613E-4  
2340.44628,0.00283,1.33332E-4,1.4683,1.44959E-4  
2339.48195,0.00312,1.42089E-4,1.46832,1.49297E-4  
2338.51761,0.00304,2.20332E-4,1.4685,1.40379E-4  
2337.55327,0.0028,1.96216E-4,1.46834,2.0875E-4  
2336.58893,0.00292,9.60131E-5,1.46794,2.36348E-4  
2335.6246,0.00344,1.31493E-4,1.46789,1.4946E-4  
2334.66026,0.00366,1.23437E-4,1.46839,1.31353E-4  
2333.69592,0.00332,1.05265E-4,1.46872,1.41982E-4  
2332.73159,0.003,1.01354E-4,1.4686,1.39669E-4  
2331.76725,0.00295,1.14145E-4,1.46842,1.52899E-4  
2330.80291,0.00296,1.36166E-4,1.46836,1.46531E-4  
2329.83857,0.00299,1.13901E-4,1.46831,1.47678E-4  
2328.87424,0.00301,1.35085E-4,1.46844,1.38479E-4  
2327.9099,0.00267,1.68868E-4,1.46853,1.30305E-4  
2326.94556,0.00239,1.33841E-4,1.46808,1.52642E-4  
2325.98123,0.00272,1.14331E-4,1.46769,1.50165E-4  
2325.01689,0.003,1.45893E-4,1.46785,1.67407E-4  
2324.05255,0.00296,1.08007E-4,1.46793,2.15901E-4  
2323.08821,0.00299,1.40387E-4,1.46796,1.4991E-4  
2322.12388,0.00286,1.11698E-4,1.46803,1.22467E-4  
2321.15954,0.00276,1.01535E-4,1.46788,1.24932E-4  
2320.1952,0.00277,1.39393E-4,1.46781,1.24712E-4  
2319.23087,0.00273,1.34626E-4,1.46762,1.56881E-4  
2318.26653,0.00299,1.0095E-4,1.46746,1.70894E-4  
2317.30219,0.00313,1.04823E-4,1.46767,1.86467E-4  
2316.33785,0.00305,1.21158E-4,1.46767,1.96045E-4  
2315.37352,0.00318,1.22834E-4,1.46771,1.61082E-4  
2314.40918,0.0031,1.10983E-4,1.46788,1.55108E-4  
2313.44484,0.00298,1.21303E-4,1.46786,1.494E-4  
2312.48051,0.00289,1.13599E-4,1.46783,1.51699E-4  
2311.51617,0.00288,1.39066E-4,1.46774,1.62433E-4  
2310.55183,0.00288,1.52773E-4,1.46781,1.406E-4  
2309.58749,0.00268,1.07686E-4,1.46779,1.29019E-4  
2308.62316,0.00262,8.8168E-5,1.46754,1.25982E-4  
2307.65882,0.00279,1.08366E-4,1.46743,1.32462E-4  
2306.69448,0.00284,1.17336E-4,1.46751,1.30124E-4  
2305.73015,0.0028,1.16559E-4,1.46747,1.33215E-4

2304.76581,0.00283,1.26963E-4,1.46747,1.32213E-4  
2303.80147,0.00278,1.1074E-4,1.46749,1.36783E-4  
2302.83713,0.00273,1.07197E-4,1.46746,1.32735E-4  
2301.8728,0.00265,9.61667E-5,1.46739,1.33947E-4  
2300.90846,0.00265,1.01775E-4,1.46722,1.38157E-4  
2299.94412,0.0028,1.23795E-4,1.46716,1.30721E-4  
2298.97979,0.00285,1.19997E-4,1.46721,1.3111E-4  
2298.01545,0.00289,1.29008E-4,1.4672,1.40337E-4  
2297.05111,0.00294,1.51044E-4,1.46732,1.3705E-4  
2296.08677,0.0028,1.27904E-4,1.46743,1.44032E-4  
2295.12244,0.00263,9.33529E-5,1.46734,1.38919E-4  
2294.1581,0.0026,8.70109E-5,1.4672,1.27045E-4  
2293.19376,0.00263,9.13494E-5,1.46712,1.24079E-4  
2292.22943,0.0027,1.05736E-4,1.46707,1.23554E-4  
2291.26509,0.00273,1.14389E-4,1.46713,1.21076E-4  
2290.30075,0.00263,1.03218E-4,1.46716,1.24814E-4  
2289.33641,0.00255,9.6424E-5,1.46703,1.30078E-4  
2288.37208,0.0026,9.56415E-5,1.46693,1.31035E-4  
2287.40774,0.00267,9.62784E-5,1.4669,1.29453E-4  
2286.4434,0.00275,1.07544E-4,1.46694,1.28412E-4  
2285.47906,0.0027,1.15922E-4,1.46708,1.26883E-4  
2284.51473,0.0025,1.00808E-4,1.46706,1.32196E-4  
2283.55039,0.00244,9.48497E-5,1.46688,1.33825E-4  
2282.58605,0.00248,1.01301E-4,1.4668,1.31507E-4  
2281.62172,0.00247,9.76092E-5,1.46673,1.28765E-4  
2280.65738,0.00251,8.93233E-5,1.46665,1.27662E-4  
2279.69304,0.00256,9.52475E-5,1.4666,1.26964E-4  
2278.7287,0.00263,1.10031E-4,1.46657,1.24385E-4  
2277.76437,0.00271,1.16694E-4,1.46661,1.27055E-4  
2276.80003,0.00268,1.10529E-4,1.46672,1.35443E-4  
2275.83569,0.00254,9.57578E-5,1.46674,1.3759E-4  
2274.87136,0.00246,9.48399E-5,1.46662,1.30003E-4  
2273.90702,0.00246,1.02463E-4,1.46654,1.27573E-4  
2272.94268,0.00245,1.05778E-4,1.46645,1.29812E-4  
2271.97834,0.00253,1.01912E-4,1.46634,1.3384E-4  
2271.01401,0.00265,1.0844E-4,1.46637,1.28593E-4  
2270.04967,0.00263,1.10348E-4,1.46646,1.28533E-4  
2269.08533,0.00258,1.12261E-4,1.46644,1.32111E-4  
2268.121,0.00256,1.10049E-4,1.46644,1.29363E-4  
2267.15666,0.00248,9.39428E-5,1.46643,1.282E-4  
2266.19232,0.00239,8.87466E-5,1.4663,1.29881E-4  
2265.22798,0.00248,9.79274E-5,1.46612,1.32154E-4  
2264.26365,0.00265,1.17662E-4,1.46615,1.24096E-4  
2263.29931,0.00265,1.20597E-4,1.46622,1.28083E-4  
2262.33497,0.00265,1.2733E-4,1.46623,1.31484E-4  
2261.37064,0.00264,1.24653E-4,1.46629,1.38209E-4  
2260.4063,0.00255,1.06233E-4,1.46628,1.37012E-4  
2259.44196,0.00254,9.91346E-5,1.46622,1.29035E-4  
2258.47762,0.00252,9.77606E-5,1.46626,1.29248E-4  
2257.51329,0.00241,9.68276E-5,1.46622,1.25252E-4  
2256.54895,0.00239,9.69597E-5,1.46609,1.26044E-4  
2255.58461,0.00246,9.55818E-5,1.46605,1.34956E-4  
2254.62028,0.00242,9.40466E-5,1.46606,1.35283E-4  
2253.65594,0.00239,9.74225E-5,1.46595,1.27714E-4  
2252.6916,0.0025,1.06289E-4,1.46586,1.27891E-4  
2251.72726,0.00261,1.20035E-4,1.46594,1.2817E-4  
2250.76293,0.00255,1.19369E-4,1.46607,1.34758E-4  
2249.79859,0.00237,1.08433E-4,1.46608,1.36041E-4  
2248.83425,0.00226,1.0319E-4,1.46591,1.29752E-4  
2247.86992,0.00232,1.00989E-4,1.46573,1.32053E-4  
2246.90558,0.00243,1.01197E-4,1.46567,1.33887E-4  
2245.94124,0.00252,1.1569E-4,1.46568,1.29095E-4  
2244.9769,0.00258,1.31509E-4,1.46572,1.23173E-4  
2244.01257,0.00259,1.33305E-4,1.46579,1.25374E-4  
2243.04823,0.00256,1.23575E-4,1.46584,1.35251E-4

2242.08389,0.00249,1.10137E-4,1.46588,1.3978E-4  
2241.11956,0.00238,1.00239E-4,1.46586,1.36745E-4  
2240.15522,0.00233,1.00486E-4,1.46577,1.2887E-4  
2239.19088,0.00233,1.01848E-4,1.46571,1.26998E-4  
2238.22654,0.00233,1.02271E-4,1.46569,1.30113E-4  
2237.26221,0.00228,9.11879E-5,1.46567,1.33171E-4  
2236.29787,0.00224,8.25002E-5,1.46561,1.31835E-4  
2235.33353,0.00222,8.99642E-5,1.46553,1.27592E-4  
2234.3692,0.00227,9.46545E-5,1.46543,1.28511E-4  
2233.40486,0.00232,1.00348E-4,1.46547,1.29348E-4  
2232.44052,0.0022,9.63606E-5,1.46546,1.33788E-4  
2231.47618,0.00218,9.22112E-5,1.46526,1.40774E-4  
2230.51185,0.00235,9.99976E-5,1.46516,1.41592E-4  
2229.54751,0.00246,1.14972E-4,1.46525,1.27445E-4  
2228.58317,0.00243,1.11561E-4,1.46529,1.22769E-4  
2227.61884,0.00244,1.16422E-4,1.46525,1.26855E-4  
2226.6545,0.00251,1.29962E-4,1.4653,1.30757E-4  
2225.69016,0.00247,1.18546E-4,1.46541,1.42857E-4  
2224.72582,0.00234,1.04146E-4,1.46543,1.45902E-4  
2223.76149,0.00226,1.06286E-4,1.46535,1.32232E-4  
2222.79715,0.00225,1.037E-4,1.46529,1.27235E-4  
2221.83281,0.00222,9.9586E-5,1.46527,1.31731E-4  
2220.86848,0.00217,9.56287E-5,1.46521,1.36815E-4  
2219.90414,0.00214,9.62257E-5,1.46512,1.3568E-4  
2218.9398,0.00217,9.86679E-5,1.46502,1.36378E-4  
2217.97546,0.00226,9.9219E-5,1.46499,1.39316E-4  
2217.01113,0.00227,9.78088E-5,1.46505,1.29219E-4  
2216.04679,0.00218,8.86379E-5,1.46503,1.23832E-4  
2215.08245,0.00219,9.44278E-5,1.46492,1.28737E-4  
2214.11812,0.00225,1.00057E-4,1.4649,1.30135E-4  
2213.15378,0.00224,9.11857E-5,1.46491,1.29283E-4  
2212.18944,0.0022,9.55009E-5,1.46488,1.27039E-4  
2211.2251,0.00221,1.07863E-4,1.46477,1.29753E-4  
2210.26077,0.00231,1.0554E-4,1.46473,1.4095E-4  
2209.29643,0.00237,1.08036E-4,1.46481,1.33648E-4  
2208.33209,0.00231,9.51495E-5,1.46487,1.35338E-4  
2207.36776,0.00223,9.50328E-5,1.46484,1.39033E-4  
2206.40342,0.00223,9.75329E-5,1.46476,1.38663E-4  
2205.43908,0.00229,9.5535E-5,1.46474,1.41985E-4  
2204.47474,0.00229,9.712E-5,1.46483,1.48534E-4  
2203.51041,0.00218,9.17011E-5,1.46486,1.47703E-4  
2202.54607,0.00207,8.51593E-5,1.46483,1.40062E-4  
2201.58173,0.00195,8.45467E-5,1.46472,1.37284E-4  
2200.6174,0.00192,9.62269E-5,1.46452,1.32494E-4  
2199.65306,0.00202,9.47317E-5,1.46436,1.33665E-4  
2198.68872,0.00219,9.1362E-5,1.46429,1.35607E-4  
2197.72438,0.00232,1.01744E-4,1.46441,1.33869E-4  
2196.76005,0.00223,9.57366E-5,1.46454,1.37344E-4  
2195.79571,0.00212,8.56409E-5,1.46446,1.38634E-4  
2194.83137,0.00213,8.30703E-5,1.46436,1.38178E-4  
2193.86703,0.00221,8.96851E-5,1.46434,1.33687E-4  
2192.9027,0.00219,9.89097E-5,1.4644,1.29479E-4  
2191.93836,0.0021,9.28076E-5,1.46436,1.37564E-4  
2190.97402,0.00209,9.70331E-5,1.46426,1.35668E-4  
2190.00969,0.00214,1.02024E-4,1.4642,1.39436E-4  
2189.04535,0.00218,1.00633E-4,1.4642,1.44912E-4  
2188.08101,0.00216,1.03282E-4,1.46419,1.41448E-4  
2187.11667,0.00218,1.08663E-4,1.46414,1.39623E-4  
2186.15234,0.00219,1.03726E-4,1.46411,1.3404E-4  
2185.188,0.00225,1.06258E-4,1.46407,1.33178E-4  
2184.22366,0.00235,1.19081E-4,1.46414,1.29483E-4  
2183.25933,0.00225,1.04514E-4,1.46428,1.29604E-4  
2182.29499,0.00207,9.24578E-5,1.46421,1.32019E-4  
2181.33065,0.00207,9.60546E-5,1.46405,1.33978E-4  
2180.36631,0.00216,1.01641E-4,1.46402,1.33581E-4

2179.40198,0.00214,9.99945E-5,1.46406,1.31753E-4  
2178.43764,0.00208,9.8477E-5,1.46398,1.32058E-4  
2177.4733,0.00214,1.05876E-4,1.46391,1.34016E-4  
2176.50897,0.00217,1.0701E-4,1.46394,1.31427E-4  
2175.54463,0.00212,9.7886E-5,1.46394,1.32695E-4  
2174.58029,0.00211,9.48003E-5,1.46386,1.36406E-4  
2173.61595,0.00214,9.40868E-5,1.46381,1.3888E-4  
2172.65162,0.00218,9.54645E-5,1.46381,1.39266E-4  
2171.68728,0.00216,9.72947E-5,1.46382,1.38166E-4  
2170.72294,0.00217,1.02732E-4,1.46378,1.35311E-4  
2169.75861,0.00218,1.02923E-4,1.46379,1.39825E-4  
2168.79427,0.00217,1.08445E-4,1.4638,1.41363E-4  
2167.82993,0.00211,1.07614E-4,1.46379,1.33072E-4  
2166.86559,0.00208,1.02381E-4,1.4637,1.30031E-4  
2165.90126,0.00214,1.0802E-4,1.46366,1.31697E-4  
2164.93692,0.00214,1.09015E-4,1.46366,1.28443E-4  
2163.97258,0.00217,1.10995E-4,1.46363,1.27254E-4  
2163.00825,0.00221,1.16241E-4,1.46366,1.31737E-4  
2162.04391,0.00219,1.16883E-4,1.46372,1.36671E-4  
2161.07957,0.0021,1.03305E-4,1.46376,1.4283E-4  
2160.11523,0.00199,8.96043E-5,1.46369,1.38337E-4  
2159.1509,0.00199,8.69603E-5,1.4636,1.31152E-4  
2158.18656,0.00196,8.85229E-5,1.46359,1.30674E-4  
2157.22222,0.0019,9.86423E-5,1.46349,1.31722E-4  
2156.25789,0.00194,9.50303E-5,1.46337,1.44925E-4  
2155.29355,0.00203,9.7452E-5,1.46335,1.46692E-4  
2154.32921,0.00201,1.01163E-4,1.46337,1.41678E-4  
2153.36487,0.00201,1.00349E-4,1.4633,1.33846E-4  
2152.40054,0.00206,9.69508E-5,1.46328,1.31833E-4  
2151.4362,0.00208,9.83235E-5,1.4633,1.34708E-4  
2150.47186,0.00206,1.03069E-4,1.46329,1.32679E-4  
2149.50753,0.00208,1.06093E-4,1.4633,1.31946E-4  
2148.54319,0.00204,9.99787E-5,1.46335,1.37126E-4  
2147.57885,0.00192,9.16491E-5,1.4633,1.39364E-4  
2146.61451,0.0019,8.99881E-5,1.46318,1.35795E-4  
2145.65018,0.00194,8.83872E-5,1.4631,1.31536E-4  
2144.68584,0.00202,8.91515E-5,1.46303,1.27742E-4  
2143.7215,0.00213,9.70734E-5,1.46312,1.33245E-4  
2142.75717,0.002,8.77491E-5,1.46326,1.47993E-4  
2141.79283,0.00184,8.56948E-5,1.46314,1.56065E-4  
2140.82849,0.00184,9.07703E-5,1.46299,1.64157E-4  
2139.86415,0.00192,1.02298E-4,1.4629,1.58391E-4  
2138.89982,0.002,1.10903E-4,1.46291,1.41772E-4  
2137.93548,0.002,1.05525E-4,1.46294,1.36816E-4  
2136.97114,0.00199,1.07311E-4,1.46294,1.31322E-4  
2136.00681,0.00195,9.86553E-5,1.46296,1.28224E-4  
2135.04247,0.00186,8.62498E-5,1.46292,1.34955E-4  
2134.07813,0.00181,8.43246E-5,1.46278,1.47086E-4  
2133.11379,0.0019,9.34223E-5,1.46263,1.49458E-4  
2132.14946,0.00206,1.06999E-4,1.46262,1.40937E-4  
2131.18512,0.00213,1.12134E-4,1.46273,1.38584E-4  
2130.22078,0.00207,1.12737E-4,1.46282,1.34013E-4  
2129.25645,0.00199,1.05784E-4,1.46281,1.28088E-4  
2128.29211,0.00196,1.0484E-4,1.46278,1.30449E-4  
2127.32777,0.00192,9.67719E-5,1.46279,1.36704E-4  
2126.36343,0.00183,8.30303E-5,1.46275,1.38531E-4  
2125.3991,0.00179,8.30274E-5,1.46264,1.36517E-4  
2124.43476,0.0018,8.67635E-5,1.46256,1.34242E-4  
2123.47042,0.00183,9.346E-5,1.46247,1.39518E-4  
2122.50609,0.00194,1.08814E-4,1.46244,1.4292E-4  
2121.54175,0.00193,1.11601E-4,1.46257,1.36783E-4  
2120.57741,0.00176,9.26682E-5,1.46249,1.43877E-4  
2119.61307,0.00183,8.90477E-5,1.4623,1.50373E-4  
2118.64874,0.00196,1.01155E-4,1.46234,1.38707E-4  
2117.6844,0.00191,9.38102E-5,1.46237,1.36338E-4

2116.72006,0.00194,1.01311E-4,1.4623,1.41664E-4  
2115.75573,0.00203,1.10112E-4,1.46236,1.4368E-4  
2114.79139,0.00195,9.94209E-5,1.4625,1.42376E-4  
2113.82705,0.00175,8.3992E-5,1.46249,1.44776E-4  
2112.86271,0.00163,9.46161E-5,1.46232,1.41304E-4  
2111.89838,0.00166,9.05286E-5,1.46213,1.45904E-4  
2110.93404,0.00176,8.54038E-5,1.46206,1.42215E-4  
2109.9697,0.00179,8.68655E-5,1.46205,1.40146E-4  
2109.00536,0.0018,9.56956E-5,1.46198,1.51909E-4  
2108.04103,0.00191,1.06263E-4,1.46191,1.68007E-4  
2107.07669,0.00204,1.22815E-4,1.46198,1.65787E-4  
2106.11235,0.00199,1.1533E-4,1.46215,1.53964E-4  
2105.14802,0.00181,9.68741E-5,1.46212,1.44765E-4  
2104.18368,0.00178,9.41627E-5,1.46198,1.36343E-4  
2103.21934,0.00186,9.65593E-5,1.46191,1.33946E-4  
2102.255,0.00191,1.00276E-4,1.46194,1.3963E-4  
2101.29067,0.0019,1.04077E-4,1.46199,1.40503E-4  
2100.32633,0.00182,9.73388E-5,1.46202,1.40917E-4  
2099.36199,0.00175,9.09852E-5,1.46196,1.44088E-4  
2098.39766,0.0017,9.06615E-5,1.46193,1.37367E-4  
2097.43332,0.00163,8.83178E-5,1.46182,1.30224E-4  
2096.46898,0.00165,8.3509E-5,1.46171,1.36261E-4  
2095.50464,0.00169,8.70639E-5,1.46166,1.43618E-4  
2094.54031,0.00173,9.57319E-5,1.46162,1.49265E-4  
2093.57597,0.00174,9.58518E-5,1.46162,1.5179E-4  
2092.61163,0.00171,9.03129E-5,1.46159,1.5441E-4  
2091.6473,0.00174,9.75216E-5,1.46151,1.55019E-4  
2090.68296,0.00176,9.91992E-5,1.46154,1.39543E-4  
2089.71862,0.00169,8.75146E-5,1.46148,1.30857E-4  
2088.75428,0.00173,9.63021E-5,1.46139,1.36477E-4  
2087.78995,0.00177,1.03458E-4,1.46138,1.51973E-4  
2086.82561,0.00179,1.12134E-4,1.46136,1.63535E-4  
2085.86127,0.0018,1.05849E-4,1.46138,1.65802E-4  
2084.89694,0.00172,9.23826E-5,1.46135,1.62197E-4  
2083.9326,0.00179,9.87932E-5,1.46124,1.51441E-4  
2082.96826,0.00184,1.03502E-4,1.46131,1.35682E-4  
2082.00392,0.00174,9.59317E-5,1.46132,1.3733E-4  
2081.03959,0.00172,9.60629E-5,1.46122,1.46794E-4  
2080.07525,0.00177,9.40235E-5,1.46119,1.55081E-4  
2079.11091,0.00173,8.98314E-5,1.4612,1.59469E-4  
2078.14658,0.00169,8.94308E-5,1.46113,1.58959E-4  
2077.18224,0.0017,8.92882E-5,1.46108,1.54321E-4  
2076.2179,0.00169,9.49234E-5,1.461,1.56135E-4  
2075.25356,0.00175,1.05626E-4,1.46094,1.55817E-4  
2074.28923,0.0018,1.06174E-4,1.46092,1.51604E-4  
2073.32489,0.00184,1.07874E-4,1.46093,1.58296E-4  
2072.36055,0.00181,1.18185E-4,1.46097,1.53211E-4  
2071.39622,0.00174,1.07997E-4,1.46092,1.51451E-4  
2070.43188,0.00178,9.60025E-5,1.46082,1.53767E-4  
2069.46754,0.00185,1.03247E-4,1.46084,1.43819E-4  
2068.5032,0.00184,1.13187E-4,1.4609,1.41612E-4  
2067.53887,0.00176,1.13069E-4,1.46091,1.47565E-4  
2066.57453,0.00169,1.0408E-4,1.46086,1.57254E-4  
2065.61019,0.00165,9.9714E-5,1.46078,1.59289E-4  
2064.64586,0.00163,9.07022E-5,1.46069,1.58458E-4  
2063.68152,0.00164,8.76339E-5,1.46061,1.55724E-4  
2062.71718,0.00167,9.18134E-5,1.46052,1.49283E-4  
2061.75284,0.00173,9.55697E-5,1.46046,1.55069E-4  
2060.78851,0.00184,1.02474E-4,1.46045,1.63282E-4  
2059.82417,0.00188,1.05052E-4,1.46058,1.55473E-4  
2058.85983,0.00175,9.70068E-5,1.46063,1.52638E-4  
2057.8955,0.00163,9.82344E-5,1.46055,1.5631E-4  
2056.93116,0.00157,9.70127E-5,1.46043,1.64453E-4  
2055.96682,0.00158,9.58631E-5,1.46027,1.67402E-4  
2055.00248,0.00171,9.93929E-5,1.46017,1.62206E-4

2054.03815,0.00179,1.03152E-4,1.46019,1.5803E-4  
2053.07381,0.00182,9.85032E-5,1.46018,1.7018E-4  
2052.10947,0.00187,1.00575E-4,1.46021,1.73964E-4  
2051.14514,0.00181,9.45307E-5,1.46026,1.65492E-4  
2050.1808,0.00173,8.9835E-5,1.46019,1.55659E-4  
2049.21646,0.00176,9.54375E-5,1.46008,1.571E-4  
2048.25212,0.00185,1.01174E-4,1.46007,1.55348E-4  
2047.28779,0.00183,9.81283E-5,1.46014,1.56143E-4  
2046.32345,0.00173,9.98423E-5,1.46011,1.73531E-4  
2045.35911,0.00169,1.0099E-4,1.45999,1.92043E-4  
2044.39478,0.00174,1.02898E-4,1.45989,1.96671E-4  
2043.43044,0.00181,1.08969E-4,1.45986,1.84965E-4  
2042.4661,0.00181,1.02769E-4,1.45987,1.7372E-4  
2041.50176,0.00182,1.042E-4,1.4598,1.78211E-4  
2040.53743,0.00188,1.13118E-4,1.4598,1.74078E-4  
2039.57309,0.00187,1.08987E-4,1.45981,1.73901E-4  
2038.60875,0.00187,1.06044E-4,1.45978,1.80686E-4  
2037.64442,0.00186,1.0858E-4,1.45976,1.74665E-4  
2036.68008,0.00187,1.1582E-4,1.4597,1.74723E-4  
2035.71574,0.00195,1.33384E-4,1.45969,1.69845E-4  
2034.7514,0.00195,1.25152E-4,1.45976,1.58376E-4  
2033.78707,0.00188,1.09692E-4,1.45978,1.53083E-4  
2032.82273,0.00182,1.07127E-4,1.45974,1.57168E-4  
2031.85839,0.00178,1.09573E-4,1.45969,1.63989E-4  
2030.89406,0.00174,1.11113E-4,1.45961,1.66118E-4  
2029.92972,0.00176,1.03809E-4,1.45951,1.6675E-4  
2028.92538,0.00182,1.00679E-4,1.45946,1.63138E-4  
2028.00104,0.00188,1.05498E-4,1.45948,1.60564E-4  
2027.03671,0.00185,1.11363E-4,1.45952,1.57333E-4  
2026.07237,0.00179,1.04952E-4,1.45949,1.63391E-4  
2025.10803,0.00178,1.00845E-4,1.45943,1.73813E-4  
2024.1437,0.0018,1.04076E-4,1.45941,1.72401E-4  
2023.17936,0.00174,9.81187E-5,1.45944,1.61884E-4  
2022.21502,0.00163,9.45247E-5,1.45934,1.60741E-4  
2021.25068,0.00165,1.06614E-4,1.45918,1.72816E-4  
2020.28635,0.00174,1.08992E-4,1.45912,1.85429E-4  
2019.32201,0.00181,1.12254E-4,1.45912,1.7998E-4  
2018.35767,0.00184,1.14495E-4,1.4592,1.66644E-4  
2017.39333,0.00168,1.06919E-4,1.45924,1.67494E-4  
2016.429,0.00157,9.84658E-5,1.45904,1.76828E-4  
2015.46466,0.00169,9.33713E-5,1.45889,1.76975E-4  
2014.50032,0.00177,9.52388E-5,1.45892,1.73285E-4  
2013.53599,0.00171,9.78842E-5,1.45893,1.76574E-4  
2012.57165,0.00169,1.04592E-4,1.45883,1.89514E-4  
2011.60731,0.00174,1.05706E-4,1.45876,1.99675E-4  
2010.64297,0.00176,1.06704E-4,1.45874,1.96797E-4  
2009.67864,0.00176,1.06887E-4,1.4587,1.93714E-4  
2008.7143,0.00179,1.12003E-4,1.45865,1.88358E-4  
2007.74996,0.00179,1.14813E-4,1.45864,1.7315E-4  
2006.78563,0.00176,1.08279E-4,1.45855,1.75819E-4  
2005.82129,0.00187,1.06936E-4,1.45846,2.02578E-4  
2004.85695,0.00195,1.25327E-4,1.45856,1.94903E-4  
2003.89261,0.00181,1.15306E-4,1.45859,1.81181E-4  
2002.92828,0.00179,1.12496E-4,1.4584,1.85141E-4  
2001.96394,0.00192,1.15728E-4,1.45834,1.82092E-4  
2000.9996,0.00199,1.16868E-4,1.4584,1.70096E-4  
2000.03527,0.00195,1.13692E-4,1.45844,1.66274E-4  
1999.07093,0.00193,1.1532E-4,1.4584,1.71503E-4  
1998.10659,0.00192,1.21226E-4,1.45839,1.82942E-4  
1997.14225,0.00191,1.25769E-4,1.45837,1.88131E-4  
1996.17792,0.00187,1.21537E-4,1.45836,1.82042E-4  
1995.21358,0.00184,1.19316E-4,1.45827,1.81066E-4  
1994.24924,0.0019,1.31029E-4,1.45825,1.7782E-4  
1993.28491,0.00186,1.29639E-4,1.45832,1.72575E-4  
1992.32057,0.0017,1.21123E-4,1.45824,1.68745E-4



1991.35623,0.00172,1.14827E-4,1.45804,1.71808E-4  
1990.39189,0.00183,1.16176E-4,1.45799,1.75025E-4  
1989.42756,0.00187,1.16543E-4,1.458,1.75481E-4  
1988.46322,0.00189,1.18268E-4,1.45802,1.67184E-4  
1987.49888,0.00184,1.07112E-4,1.45806,1.60582E-4  
1986.53455,0.00171,1.04733E-4,1.45801,1.64192E-4  
1985.57021,0.00166,1.17159E-4,1.45785,1.79137E-4  
1984.60587,0.00168,1.19054E-4,1.45773,1.97397E-4  
1983.64153,0.00177,1.16331E-4,1.45762,2.04758E-4  
1982.6772,0.00187,1.17344E-4,1.45763,1.87845E-4  
1981.71286,0.00185,1.11976E-4,1.45767,1.70321E-4  
1980.74852,0.00177,1.08982E-4,1.45761,1.70903E-4  
1979.78419,0.00178,1.07566E-4,1.45746,1.87256E-4  
1978.81985,0.00189,1.10273E-4,1.45739,1.96856E-4  
1977.85551,0.00196,1.11796E-4,1.4574,2.00012E-4  
1976.89117,0.00199,1.18057E-4,1.45743,1.98721E-4  
1975.92684,0.00197,1.26083E-4,1.45745,1.87853E-4  
1974.9625,0.00191,1.21639E-4,1.45743,1.8033E-4  
1973.99816,0.00188,1.15246E-4,1.45733,1.77386E-4  
1973.03383,0.00195,1.09541E-4,1.45724,1.75542E-4  
1972.06949,0.00202,1.11039E-4,1.45727,1.70752E-4  
1971.10515,0.00199,1.12225E-4,1.45732,1.74619E-4  
1970.14081,0.00197,1.16053E-4,1.4573,1.78986E-4  
1969.17648,0.0019,1.12229E-4,1.45735,1.72896E-4  
1968.21214,0.00173,1.03094E-4,1.45727,1.72404E-4  
1967.2478,0.00169,1.0016E-4,1.45703,1.79784E-4  
1966.28347,0.00182,1.05176E-4,1.45689,1.87321E-4  
1965.31913,0.00192,1.16821E-4,1.45688,1.83426E-4  
1964.35479,0.00197,1.1633E-4,1.45687,1.84278E-4  
1963.39045,0.00199,1.1469E-4,1.45691,1.9447E-4  
1962.42612,0.00195,1.22557E-4,1.45691,1.90978E-4  
1961.46178,0.00193,1.20042E-4,1.45689,1.7806E-4  
1960.49744,0.00188,1.08963E-4,1.45688,1.71407E-4  
1959.53311,0.00179,1.06743E-4,1.45679,1.72256E-4  
1958.56877,0.00181,1.11883E-4,1.45666,1.85423E-4  
1957.60443,0.00185,1.10031E-4,1.4566,1.99225E-4  
1956.64009,0.00191,1.09058E-4,1.45657,2.08834E-4  
1955.67576,0.00185,1.13807E-4,1.45662,2.01302E-4  
1954.71142,0.00173,1.1489E-4,1.45646,2.02223E-4  
1953.74708,0.00184,1.2087E-4,1.45628,2.0159E-4  
1952.78275,0.00197,1.15308E-4,1.45628,1.89449E-4  
1951.81841,0.00197,1.12995E-4,1.45633,1.92489E-4  
1950.85407,0.00191,1.20186E-4,1.45631,2.0006E-4  
1949.88973,0.00186,1.21516E-4,1.4562,2.13441E-4  
1948.9254,0.00196,1.24525E-4,1.45608,2.26177E-4  
1947.96106,0.00204,1.26309E-4,1.45614,2.06772E-4  
1946.99672,0.00197,1.14843E-4,1.45618,2.03398E-4  
1946.03239,0.00187,1.10191E-4,1.4561,2.11414E-4  
1945.06805,0.00188,1.13462E-4,1.45593,2.21727E-4  
1944.10371,0.00197,1.23967E-4,1.45592,2.28521E-4  
1943.13937,0.00188,1.29398E-4,1.45588,2.28681E-4  
1942.17504,0.00191,1.49002E-4,1.45565,2.33666E-4  
1941.2107,0.00218,1.81878E-4,1.45562,2.12664E-4  
1940.24636,0.00223,1.74788E-4,1.4558,1.82856E-4  
1939.28203,0.00211,1.44225E-4,1.45587,1.71673E-4  
1938.31769,0.00199,1.21054E-4,1.45582,1.78559E-4  
1937.35335,0.00199,1.17578E-4,1.45569,1.87622E-4  
1936.38901,0.00202,1.21547E-4,1.45571,1.85035E-4  
1935.42468,0.00189,1.14988E-4,1.4557,1.87909E-4  
1934.46034,0.00178,1.14007E-4,1.45553,1.98174E-4  
1933.496,0.00184,1.20026E-4,1.45534,2.10684E-4  
1932.53167,0.00194,1.27066E-4,1.45528,2.04062E-4  
1931.56733,0.00196,1.29928E-4,1.45522,2.03509E-4  
1930.60299,0.00204,1.33438E-4,1.45514,2.22192E-4  
1929.63865,0.00213,1.36683E-4,1.45518,2.28935E-4

1928.67432,0.00208,1.35141E-4,1.45525,2.18285E-4  
1927.70998,0.002,1.2913E-4,1.45519,2.1656E-4  
1926.74564,0.00199,1.29728E-4,1.45513,2.08189E-4  
1925.7813,0.00195,1.26595E-4,1.45508,1.98244E-4  
1924.81697,0.00189,1.19984E-4,1.45498,2.06754E-4  
1923.85263,0.0019,1.22083E-4,1.45484,2.15718E-4  
1922.88829,0.00195,1.21581E-4,1.45477,2.05593E-4  
1921.92396,0.00199,1.21271E-4,1.4547,2.15151E-4  
1920.95962,0.00206,1.25801E-4,1.45469,2.1731E-4  
1919.99528,0.00204,1.27814E-4,1.45472,2.06325E-4  
1919.03094,0.00192,1.39644E-4,1.4547,2.03274E-4  
1918.06661,0.00181,1.41739E-4,1.45452,2.29787E-4  
1917.10227,0.0019,1.17945E-4,1.45428,2.70056E-4  
1916.13793,0.0021,1.34359E-4,1.45427,2.58125E-4  
1915.1736,0.00207,1.39588E-4,1.45435,2.43604E-4  
1914.20926,0.00202,1.37498E-4,1.45429,2.40383E-4  
1913.24492,0.00198,1.35645E-4,1.45424,2.25911E-4  
1912.28058,0.00191,1.28614E-4,1.45412,2.22475E-4  
1911.31625,0.00194,1.29166E-4,1.45391,2.53398E-4  
1910.35191,0.00212,1.52489E-4,1.4538,2.58528E-4  
1909.38757,0.00219,1.66386E-4,1.45387,2.24972E-4  
1908.42324,0.00217,1.56569E-4,1.45382,2.2125E-4  
1907.4589,0.00222,1.59141E-4,1.45381,2.04546E-4  
1906.49456,0.00216,1.41028E-4,1.45382,1.91318E-4  
1905.53022,0.00213,1.29439E-4,1.4537,2.03594E-4  
1904.56589,0.00221,1.2861E-4,1.45365,2.04088E-4  
1903.60155,0.00215,1.20266E-4,1.45367,2.09908E-4  
1902.63721,0.00209,1.24109E-4,1.45354,2.32223E-4  
1901.67288,0.00212,1.34164E-4,1.45342,2.47931E-4  
1900.70854,0.00218,1.44387E-4,1.45333,2.5491E-4  
1899.7442,0.00224,1.56568E-4,1.45332,2.36141E-4  
1898.77986,0.00224,1.49499E-4,1.4533,2.1216E-4  
1897.81553,0.00223,1.3415E-4,1.45327,2.10625E-4  
1896.85119,0.0022,1.32059E-4,1.45325,2.17746E-4  
1895.88685,0.0021,1.34426E-4,1.45319,2.33986E-4  
1894.92252,0.00211,1.43063E-4,1.45298,2.46688E-4  
1893.95818,0.00227,1.65117E-4,1.45296,2.2534E-4  
1892.99384,0.00221,1.5312E-4,1.45308,2.09329E-4  
1892.0295,0.00203,1.33582E-4,1.45302,2.05802E-4  
1891.06517,0.00191,1.32824E-4,1.45291,2.01066E-4  
1890.10083,0.00169,1.28991E-4,1.45266,2.22964E-4  
1889.13649,0.00181,1.1654E-4,1.45215,2.70571E-4  
1888.17216,0.00225,1.28705E-4,1.45206,2.85709E-4  
1887.20782,0.00236,1.48988E-4,1.45225,2.73408E-4  
1886.24348,0.00227,1.57157E-4,1.45228,2.5456E-4  
1885.27914,0.00222,1.58311E-4,1.45219,2.43292E-4  
1884.31481,0.00221,1.50616E-4,1.45206,2.37298E-4  
1883.35047,0.00229,1.4434E-4,1.45192,2.40201E-4  
1882.38613,0.0024,1.51897E-4,1.45192,2.40337E-4  
1881.4218,0.00237,1.5507E-4,1.45195,2.36881E-4  
1880.45746,0.0023,1.51623E-4,1.45186,2.47885E-4  
1879.49312,0.00233,1.56156E-4,1.45176,2.62431E-4  
1878.52878,0.00231,1.6145E-4,1.45171,2.52817E-4  
1877.56445,0.00232,1.58479E-4,1.45156,2.45203E-4  
1876.60011,0.00238,1.59685E-4,1.45153,2.34547E-4  
1875.63577,0.00232,1.43992E-4,1.45148,2.32049E-4  
1874.67144,0.00232,1.40832E-4,1.45133,2.50674E-4  
1873.7071,0.00241,1.52483E-4,1.45124,2.62108E-4  
1872.74276,0.00244,1.58956E-4,1.45126,2.47189E-4  
1871.77842,0.00235,1.46882E-4,1.45126,2.44473E-4  
1870.81409,0.00222,1.43895E-4,1.45113,2.62781E-4  
1869.84975,0.00219,1.60687E-4,1.45093,2.62551E-4  
1868.88541,0.00219,1.6395E-4,1.45073,2.46947E-4  
1867.92108,0.00232,1.5678E-4,1.45051,2.63325E-4  
1866.95674,0.00248,1.57495E-4,1.45047,2.72544E-4

1865.9924,0.00253,1.676E-4,1.45047,2.67737E-4  
1865.02806,0.00252,1.72449E-4,1.45047,2.57935E-4  
1864.06373,0.00246,1.64274E-4,1.45039,2.49292E-4  
1863.09939,0.00243,1.62584E-4,1.45026,2.43265E-4  
1862.13505,0.00243,1.56995E-4,1.4501,2.52653E-4  
1861.17072,0.00254,1.61599E-4,1.44992,2.69476E-4  
1860.20638,0.00271,1.77806E-4,1.44997,2.54044E-4  
1859.24204,0.00254,1.5517E-4,1.45007,2.38157E-4  
1858.2777,0.00235,1.43633E-4,1.44976,2.65754E-4  
1857.31337,0.00255,1.65381E-4,1.44948,2.93625E-4  
1856.34903,0.00274,1.92413E-4,1.4495,2.73806E-4  
1855.38469,0.00269,1.8771E-4,1.44954,2.52785E-4  
1854.42036,0.00264,1.81812E-4,1.44941,2.52741E-4  
1853.45602,0.00268,1.86175E-4,1.44928,2.61744E-4  
1852.49168,0.00278,1.92593E-4,1.44922,2.63927E-4  
1851.52734,0.00274,1.8766E-4,1.44929,2.46508E-4  
1850.56301,0.00259,1.64431E-4,1.44917,2.51156E-4  
1849.59867,0.00261,1.64793E-4,1.44902,2.62736E-4  
1848.63433,0.00253,1.69325E-4,1.44896,2.59314E-4  
1847.67,0.00243,1.64535E-4,1.44868,2.67972E-4  
1846.70566,0.00272,1.85956E-4,1.44849,2.77791E-4  
1845.74132,0.0027,1.90379E-4,1.44886,2.60095E-4  
1844.77698,0.00199,1.64475E-4,1.44872,2.41174E-4  
1843.81265,0.00187,1.53632E-4,1.44782,2.52907E-4  
1842.84831,0.00241,1.60336E-4,1.44741,2.69055E-4  
1841.88397,0.00266,1.68593E-4,1.4474,2.72929E-4  
1840.91964,0.00283,1.80983E-4,1.4473,2.78445E-4  
1839.9553,0.00301,1.89009E-4,1.44734,2.83552E-4  
1838.99096,0.00297,1.83617E-4,1.44743,2.84434E-4  
1838.02662,0.00279,1.82203E-4,1.44725,2.87218E-4  
1837.06229,0.00296,2.03227E-4,1.44697,2.86706E-4  
1836.09795,0.00306,1.98082E-4,1.44704,2.7139E-4  
1835.13361,0.00289,2.06259E-4,1.4469,2.61352E-4  
1834.16927,0.00301,1.98884E-4,1.44656,3.03065E-4  
1833.20494,0.00335,2.14514E-4,1.44653,3.1312E-4  
1832.2406,0.00338,2.21014E-4,1.44684,2.99438E-4  
1831.27626,0.00293,2.03426E-4,1.44698,2.83598E-4  
1830.31193,0.00238,1.92378E-4,1.44647,2.65388E-4  
1829.34759,0.00259,1.881E-4,1.44567,2.57667E-4  
1828.38325,0.00305,1.88435E-4,1.44548,2.59083E-4  
1827.41891,0.00335,1.92884E-4,1.4455,2.81307E-4  
1826.45458,0.00331,1.99576E-4,1.44581,2.72299E-4  
1825.49024,0.00272,2.23524E-4,1.44557,2.89187E-4  
1824.5259,0.00276,2.28355E-4,1.44474,3.43731E-4  
1823.56157,0.0033,2.11484E-4,1.44442,3.60285E-4  
1822.59723,0.00355,2.06735E-4,1.4444,3.48802E-4  
1821.63289,0.00377,2.18801E-4,1.44424,3.69244E-4  
1820.66855,0.00408,2.23939E-4,1.44426,3.79721E-4  
1819.70422,0.00422,2.20111E-4,1.44446,3.48435E-4  
1818.73988,0.00401,2.07719E-4,1.44459,3.24723E-4  
1817.77554,0.00383,2.06008E-4,1.44433,3.41698E-4  
1816.81121,0.00393,2.14699E-4,1.44408,3.47346E-4  
1815.84687,0.00403,2.23392E-4,1.44401,3.37973E-4  
1814.88253,0.00397,2.2805E-4,1.44394,3.41092E-4  
1813.91819,0.00392,2.31461E-4,1.4437,3.62809E-4  
1812.95386,0.00401,2.26532E-4,1.44345,3.89189E-4  
1811.98952,0.0042,2.40285E-4,1.44332,3.81511E-4  
1811.02518,0.00423,2.37968E-4,1.44335,3.43505E-4  
1810.06085,0.00416,2.28367E-4,1.4432,3.31624E-4  
1809.09651,0.0042,2.28149E-4,1.44307,3.14388E-4  
1808.13217,0.00414,2.17079E-4,1.44294,3.12615E-4  
1807.16783,0.00414,2.09677E-4,1.44271,3.43868E-4  
1806.2035,0.00426,2.22139E-4,1.44257,3.52766E-4  
1805.23916,0.00424,2.37417E-4,1.44255,3.36398E-4  
1804.27482,0.00416,2.36458E-4,1.4425,3.2232E-4

1803.31049,0.00383,2.25011E-4,1.44236,3.20153E-4  
1802.34615,0.00373,2.22492E-4,1.4418,3.19341E-4  
1801.38181,0.00392,2.13656E-4,1.44163,3.21624E-4  
1800.41747,0.00361,2.12455E-4,1.4414,3.72582E-4  
1799.45314,0.00374,2.42257E-4,1.44063,3.75974E-4  
1798.4888,0.00441,2.52266E-4,1.44055,3.46081E-4  
1797.52446,0.00429,2.43189E-4,1.44097,3.32824E-4  
1796.56013,0.00374,2.30722E-4,1.44071,3.24041E-4  
1795.59579,0.00364,2.2417E-4,1.44005,3.32692E-4  
1794.63145,0.00402,2.22515E-4,1.43972,3.78516E-4  
1793.66711,0.00386,2.33076E-4,1.43998,3.69165E-4  
1792.70278,0.00312,2.16685E-4,1.43932,3.68945E-4  
1791.73844,0.00343,2.20674E-4,1.43826,3.90556E-4  
1790.7741,0.00398,2.29979E-4,1.43798,3.82672E-4  
1789.80977,0.00414,2.25455E-4,1.43784,3.84925E-4  
1788.84543,0.00426,2.36985E-4,1.43762,3.83062E-4  
1787.88109,0.00432,2.4197E-4,1.43744,3.69577E-4  
1786.91675,0.00435,2.3973E-4,1.43726,3.62459E-4  
1785.95242,0.00411,2.31904E-4,1.43711,3.56979E-4  
1784.98808,0.00382,2.24677E-4,1.4364,4.03014E-4  
1784.02374,0.00422,2.38862E-4,1.43565,4.57662E-4  
1783.05941,0.00468,2.86668E-4,1.43556,4.2952E-4  
1782.09507,0.00455,2.85566E-4,1.43562,3.70627E-4  
1781.13073,0.00413,2.50414E-4,1.43521,3.57805E-4  
1780.16639,0.00406,2.42128E-4,1.43438,3.89527E-4  
1779.20206,0.0044,2.44148E-4,1.43378,4.07313E-4  
1778.23772,0.00464,2.40762E-4,1.43344,4.42848E-4  
1777.27338,0.00479,2.5942E-4,1.4332,4.71821E-4  
1776.30905,0.00459,2.87341E-4,1.43293,4.52487E-4  
1775.34471,0.00454,2.90069E-4,1.43222,4.27056E-4  
1774.38037,0.00482,2.82022E-4,1.43194,4.19841E-4  
1773.41603,0.00415,2.71374E-4,1.43187,4.12854E-4  
1772.4517,0.00325,2.68896E-4,1.43027,4.36225E-4  
1771.48736,0.00414,2.76475E-4,1.42832,4.92016E-4  
1770.52302,0.00547,2.99112E-4,1.4278,5.01498E-4  
1769.55869,0.00611,3.33865E-4,1.42783,4.97554E-4  
1768.59435,0.00601,3.51804E-4,1.42775,4.36978E-4  
1767.63001,0.00588,3.23842E-4,1.42685,4.3214E-4  
1766.66567,0.00642,2.96108E-4,1.42597,4.70621E-4  
1765.70134,0.00695,2.85456E-4,1.42548,4.97575E-4  
1764.737,0.00731,3.0089E-4,1.42504,5.38051E-4  
1763.77266,0.00766,3.49278E-4,1.42466,5.52706E-4  
1762.80833,0.00761,3.67927E-4,1.42436,5.08493E-4  
1761.84399,0.00739,3.40241E-4,1.42335,4.72836E-4  
1760.87965,0.00796,3.24854E-4,1.42217,4.97904E-4  
1759.91531,0.00861,3.29531E-4,1.4216,5.01868E-4  
1758.95098,0.00892,3.26879E-4,1.42101,5.13697E-4  
1757.98664,0.00923,3.36695E-4,1.42033,5.36847E-4  
1757.0223,0.00943,3.69162E-4,1.41947,5.60135E-4  
1756.05797,0.01,3.76037E-4,1.41839,6.03945E-4  
1755.09363,0.01077,3.87132E-4,1.41772,6.06489E-4  
1754.12929,0.01129,4.00085E-4,1.4172,5.82245E-4  
1753.16495,0.01169,4.06238E-4,1.41682,5.75631E-4  
1752.20062,0.01127,3.94783E-4,1.4163,5.57253E-4  
1751.23628,0.01108,3.66457E-4,1.41431,5.85351E-4  
1750.27194,0.01242,3.7922E-4,1.41273,6.70291E-4  
1749.3076,0.01316,4.29748E-4,1.41196,6.76212E-4  
1748.34327,0.01403,4.31172E-4,1.41064,6.47875E-4  
1747.37893,0.01518,4.15531E-4,1.40986,6.50114E-4  
1746.41459,0.01603,4.16504E-4,1.40913,6.87783E-4  
1745.45026,0.01686,4.07706E-4,1.40855,7.21447E-4  
1744.48592,0.01722,4.22209E-4,1.40808,7.43741E-4  
1743.52158,0.01726,4.62219E-4,1.40694,7.29135E-4  
1742.55724,0.01798,4.67188E-4,1.40552,7.34819E-4  
1741.59291,0.01859,4.84954E-4,1.40473,7.3776E-4

1740.62857,0.01847,5.0698E-4,1.40358,7.11972E-4  
1739.66423,0.01849,4.68068E-4,1.40149,7.15047E-4  
1738.69999,0.01942,4.39376E-4,1.39927,7.68433E-4  
1737.73556,0.02035,4.53229E-4,1.39764,8.02135E-4  
1736.77122,0.02098,4.66485E-4,1.39599,8.35016E-4  
1735.80688,0.02081,4.93992E-4,1.39439,8.67377E-4  
1734.84255,0.01956,5.55979E-4,1.39081,8.60287E-4  
1733.87821,0.02068,5.95258E-4,1.38468,9.6436E-4  
1732.91387,0.02483,5.46779E-4,1.38037,0.0011  
1731.94954,0.02768,5.12023E-4,1.37802,0.00113  
1730.9852,0.02965,5.36924E-4,1.37453,0.0012  
1730.02086,0.03234,5.78856E-4,1.36997,0.00131  
1729.05652,0.0363,6.64699E-4,1.36529,0.00147  
1728.09219,0.04058,8.43075E-4,1.36078,0.00163  
1727.12785,0.04579,0.0011,1.35571,0.00175  
1726.16351,0.05211,0.00147,1.35083,0.00185  
1725.19918,0.05932,0.00198,1.34613,0.00192  
1724.23484,0.06751,0.00262,1.34119,0.0019  
1723.2705,0.07788,0.00331,1.33653,0.00185  
1722.30616,0.0898,0.00395,1.33318,0.00187  
1721.34183,0.10326,0.00439,1.33135,0.00218  
1720.37749,0.11743,0.00459,1.33155,0.00277  
1719.41315,0.13128,0.00463,1.33302,0.00356  
1718.44882,0.14768,0.00448,1.33244,0.00455  
1717.48448,0.17219,0.00388,1.33925,0.00556  
1716.52014,0.18874,0.00312,1.35679,0.00605  
1715.5558,0.20059,0.00262,1.36958,0.00641  
1714.59147,0.21559,0.00277,1.38559,0.00624  
1713.62713,0.22721,0.00331,1.40623,0.00571  
1712.66279,0.23463,0.00393,1.42908,0.00517  
1711.69846,0.23846,0.00443,1.45267,0.00445  
1710.73412,0.23784,0.00477,1.47765,0.00378  
1709.76978,0.23272,0.00494,1.50146,0.0031  
1708.80544,0.22308,0.00507,1.52419,0.00261  
1707.84111,0.21044,0.00523,1.54359,0.00206  
1706.87677,0.19363,0.0051,1.56115,0.00166  
1705.91243,0.17534,0.00481,1.57145,0.0016  
1704.9481,0.15834,0.00452,1.5804,0.00159  
1703.98376,0.14001,0.00415,1.58435,0.00159  
1703.01942,0.12479,0.00395,1.58581,0.0016  
1702.05508,0.11221,0.00405,1.58568,0.00175  
1701.09075,0.09802,0.00392,1.59002,0.0024  
1700.12641,0.07762,0.00272,1.58276,0.00277  
1699.16207,0.07363,0.00221,1.57168,0.00228  
1698.19774,0.06855,0.0021,1.57105,0.00216  
1697.2334,0.06182,0.00205,1.56797,0.00217  
1696.26906,0.05378,0.00182,1.56578,0.00239  
1695.30472,0.04747,0.00125,1.55847,0.00233  
1694.34039,0.04599,0.00102,1.55431,0.00204  
1693.37605,0.04273,9.75982E-4,1.55232,0.0019  
1692.41171,0.03889,8.98E-4,1.54974,0.00186  
1691.44738,0.0356,7.8784E-4,1.5468,0.00181  
1690.48304,0.03242,6.7483E-4,1.54394,0.00174  
1689.5187,0.03024,5.75558E-4,1.54079,0.00165  
1688.55436,0.02819,5.02268E-4,1.53882,0.00158  
1687.59003,0.0258,4.44008E-4,1.53663,0.0015  
1686.62569,0.02359,4.57631E-4,1.53472,0.00142  
1685.66135,0.02068,6.00781E-4,1.53313,0.00145  
1684.69702,0.01644,5.89393E-4,1.52964,0.00147  
1683.73268,0.0155,4.34465E-4,1.52366,0.0013  
1682.76834,0.01731,3.14121E-4,1.52075,0.00117  
1681.804,0.01784,3.02034E-4,1.52001,0.0011  
1680.83967,0.01684,3.34337E-4,1.51941,0.00106  
1679.87533,0.01565,3.21963E-4,1.51774,0.00103  
1678.91099,0.01508,2.6894E-4,1.51627,0.00101

1677.94666,0.01434,2.56664E-4,1.51502,9.59146E-4  
1676.98232,0.01352,2.86338E-4,1.51397,9.25074E-4  
1676.01798,0.01196,3.27425E-4,1.51269,9.15345E-4  
1675.05364,0.01098,2.86863E-4,1.50978,8.43345E-4  
1674.08931,0.01237,2.31594E-4,1.50795,7.56058E-4  
1673.12497,0.01244,2.65337E-4,1.50824,7.43996E-4  
1672.16063,0.01136,2.83964E-4,1.50768,7.57466E-4  
1671.1963,0.01037,2.99464E-4,1.50662,7.65747E-4  
1670.23196,0.00955,3.3992E-4,1.50546,7.54309E-4  
1669.26762,0.00835,3.92516E-4,1.50364,7.0117E-4  
1668.30328,0.00895,3.15048E-4,1.50111,6.35695E-4  
1667.33895,0.01015,2.51766E-4,1.50056,6.17168E-4  
1666.37461,0.01037,2.86038E-4,1.50055,6.02843E-4  
1665.41027,0.00992,3.18044E-4,1.50053,6.12951E-4  
1664.44594,0.00925,3.0968E-4,1.50012,6.37822E-4  
1663.4816,0.00808,3.05986E-4,1.49936,6.34584E-4  
1662.51726,0.00775,2.89881E-4,1.49736,5.90278E-4  
1661.55292,0.00862,2.53227E-4,1.49641,5.93132E-4  
1660.58859,0.00899,2.51378E-4,1.49623,5.6785E-4  
1659.62425,0.00889,2.65737E-4,1.49611,5.43361E-4  
1658.65991,0.00878,2.59021E-4,1.49578,5.33035E-4  
1657.69557,0.00861,2.50448E-4,1.49568,5.30812E-4  
1656.73124,0.00842,2.61933E-4,1.49561,5.4258E-4  
1655.7669,0.00781,2.59376E-4,1.49605,6.05199E-4  
1654.80256,0.00624,3.27107E-4,1.49614,6.24531E-4  
1653.83823,0.00389,4.31194E-4,1.4949,5.32847E-4  
1652.87389,0.00323,4.0693E-4,1.49138,4.2444E-4  
1651.90955,0.00556,3.23578E-4,1.48948,4.30991E-4  
1650.94521,0.00704,2.45233E-4,1.49015,4.33332E-4  
1649.98088,0.00698,2.39775E-4,1.49096,4.23845E-4  
1649.01654,0.00623,2.64796E-4,1.49131,4.30115E-4  
1648.0522,0.0051,2.91952E-4,1.49095,4.23999E-4  
1647.08787,0.00437,3.12894E-4,1.48985,3.86156E-4  
1646.12353,0.00425,3.01276E-4,1.48859,3.84161E-4  
1645.15919,0.00488,2.52086E-4,1.48763,4.01574E-4  
1644.19485,0.00541,2.39993E-4,1.48764,3.85026E-4  
1643.23052,0.00531,2.39277E-4,1.48764,3.71773E-4  
1642.26618,0.00515,2.45705E-4,1.48746,3.67071E-4  
1641.30184,0.005,2.25748E-4,1.48726,3.80733E-4  
1640.33751,0.0048,1.96905E-4,1.4871,3.7937E-4  
1639.37317,0.00458,1.966E-4,1.48704,3.72106E-4  
1638.40883,0.00385,2.06689E-4,1.48706,3.7502E-4  
1637.44449,0.00295,2.3345E-4,1.48633,3.59256E-4  
1636.48016,0.00244,2.29089E-4,1.48527,3.5603E-4  
1635.51582,0.0025,2.4821E-4,1.4839,3.41148E-4  
1634.55148,0.00334,2.4832E-4,1.48308,3.34612E-4  
1633.58715,0.00405,2.11659E-4,1.48311,3.32936E-4  
1632.62281,0.00409,2.09557E-4,1.4834,3.25758E-4  
1631.65847,0.00383,2.06524E-4,1.48335,3.24009E-4  
1630.69413,0.00361,2.03666E-4,1.48317,3.30753E-4  
1629.7298,0.00343,2.03485E-4,1.48297,3.38816E-4  
1628.76546,0.00305,2.09039E-4,1.48278,3.45388E-4  
1627.80112,0.00277,2.14457E-4,1.48216,3.33919E-4  
1626.83679,0.00292,1.96293E-4,1.48172,3.35108E-4  
1625.87245,0.00301,1.80353E-4,1.48161,3.324E-4  
1624.90811,0.00277,1.76273E-4,1.48169,3.32068E-4  
1623.94377,0.00214,1.83836E-4,1.48144,3.2336E-4  
1622.97944,0.00171,1.83793E-4,1.48063,3.02177E-4  
1622.0151,0.00188,1.82859E-4,1.47988,2.91626E-4  
1621.05076,0.0021,1.70744E-4,1.47953,2.92791E-4  
1620.08643,0.00226,1.65406E-4,1.47927,2.80829E-4  
1619.12209,0.00233,1.684E-4,1.47925,2.72868E-4  
1618.15775,0.00205,1.71798E-4,1.4793,2.732E-4  
1617.19341,0.00137,1.71746E-4,1.4789,2.79505E-4  
1616.22908,0.00125,1.51253E-4,1.47782,2.92872E-4

1615.26474,0.00184,1.61908E-4,1.47725,2.89527E-4  
1614.3004,0.00221,1.7016E-4,1.47729,2.73901E-4  
1613.33607,0.00204,1.65475E-4,1.47734,2.80584E-4  
1612.37173,0.0019,1.70661E-4,1.47694,2.72305E-4  
1611.40739,0.00203,1.69734E-4,1.47668,2.63686E-4  
1610.44305,0.00203,1.79104E-4,1.4766,2.64241E-4  
1609.47872,0.00181,1.64244E-4,1.4764,2.77806E-4  
1608.51438,0.00178,1.52821E-4,1.47597,2.89039E-4  
1607.55004,0.00189,1.65297E-4,1.47576,2.6454E-4  
1606.58571,0.00184,1.49119E-4,1.4756,2.49031E-4  
1605.62137,0.00175,1.42504E-4,1.47535,2.4613E-4  
1604.65703,0.00178,1.50278E-4,1.47504,2.47486E-4  
1603.69269,0.00177,1.51227E-4,1.47489,2.62364E-4  
1602.72836,0.00168,1.43184E-4,1.47462,2.81542E-4  
1601.76402,0.00167,1.5149E-4,1.4743,2.91324E-4  
1600.79968,0.0018,1.85868E-4,1.47401,2.71523E-4  
1599.83535,0.00188,1.91507E-4,1.47391,2.57116E-4  
1598.87101,0.00182,1.43273E-4,1.47372,2.57577E-4  
1597.90667,0.00186,1.26538E-4,1.47344,2.37623E-4  
1596.94233,0.00211,1.70659E-4,1.47331,2.35802E-4  
1595.978,0.00207,2.00938E-4,1.47355,2.45174E-4  
1595.01366,0.00163,1.46661E-4,1.47344,2.57839E-4  
1594.04932,0.00141,1.43229E-4,1.47299,2.37207E-4  
1593.08499,0.00143,1.42818E-4,1.47262,2.36916E-4  
1592.12065,0.00139,1.38344E-4,1.47231,2.41736E-4  
1591.15631,0.00155,1.37945E-4,1.47185,2.63169E-4  
1590.19197,0.00192,1.56484E-4,1.47174,2.69103E-4  
1589.22764,0.002,1.63199E-4,1.47189,2.47482E-4  
1588.2633,0.0018,1.4934E-4,1.4719,2.47249E-4  
1587.29896,0.00162,1.52547E-4,1.47169,2.44547E-4  
1586.33463,0.00153,1.56201E-4,1.47143,2.37401E-4  
1585.37029,0.00154,1.49194E-4,1.47115,2.30066E-4  
1584.40595,0.00155,1.46247E-4,1.47096,2.25807E-4  
1583.44161,0.00161,1.45933E-4,1.47074,2.33764E-4  
1582.47728,0.00167,1.50521E-4,1.47064,2.51941E-4  
1581.51294,0.00165,1.51775E-4,1.47048,2.78241E-4  
1580.5486,0.00178,2.07107E-4,1.47033,2.73036E-4  
1579.58427,0.00185,2.44279E-4,1.47046,2.34097E-4  
1578.61993,0.00158,1.76022E-4,1.47055,2.48154E-4  
1577.65559,0.00126,1.37423E-4,1.47047,2.38799E-4  
1576.69125,7.26292E-4,1.10725E-4,1.47017,2.23743E-4  
1575.72692,5.99646E-4,9.78106E-5,1.4693,2.2512E-4  
1574.76258,0.00115,1.2271E-4,1.4689,2.29975E-4  
1573.79824,0.00133,1.32287E-4,1.46906,2.38381E-4  
1572.83391,0.00118,1.28751E-4,1.46901,2.40994E-4  
1571.86957,0.00113,1.2728E-4,1.46887,2.36217E-4  
1570.90523,9.29468E-4,1.27882E-4,1.46882,2.34969E-4  
1569.94089,5.35628E-4,1.06837E-4,1.46846,2.5016E-4  
1568.97656,5.00703E-4,1.05921E-4,1.46766,2.78951E-4  
1568.01222,0.00117,1.31258E-4,1.4672,3.01759E-4  
1567.04788,0.00159,1.83193E-4,1.46751,2.64357E-4  
1566.08354,0.00139,1.75115E-4,1.46774,2.30441E-4  
1565.11921,0.00109,1.40855E-4,1.46754,2.27784E-4  
1564.15487,0.00117,1.36677E-4,1.46718,2.39116E-4  
1563.19053,0.00132,1.37082E-4,1.46718,2.24539E-4  
1562.2262,0.00128,1.25303E-4,1.46729,2.17979E-4  
1561.26186,9.17071E-4,1.18493E-4,1.46745,2.10124E-4  
1560.29752,3.03063E-4,6.82694E-5,1.46708,2.08254E-4  
1559.33318,1.38375E-4,4.57733E-5,1.46643,2.28749E-4  
1558.36885,1.23756E-4,4.23843E-5,1.4659,2.51464E-4  
1557.40451,3.12906E-4,6.99843E-5,1.46527,2.84192E-4  
1556.44017,8.66375E-4,1.28901E-4,1.465,2.78692E-4  
1555.47584,0.00104,1.55693E-4,1.4652,2.5963E-4  
1554.5115,8.02294E-4,1.40536E-4,1.46508,2.83212E-4  
1553.54716,8.2603E-4,1.21643E-4,1.4646,3.27401E-4

1552.58282,0.00121,1.42317E-4,1.4644,3.28939E-4  
1551.61849,0.00129,1.53911E-4,1.46442,3.32957E-4  
1550.65415,0.0015,2.10363E-4,1.46427,3.14504E-4  
1549.68981,0.00162,2.45079E-4,1.46453,2.51194E-4  
1548.72548,0.00132,1.62338E-4,1.46455,2.47117E-4  
1547.76114,0.00124,1.40048E-4,1.46435,2.40322E-4  
1546.7968,0.0012,1.39247E-4,1.46438,2.34859E-4  
1545.83246,8.14355E-4,1.2545E-4,1.46433,2.3273E-4  
1544.86813,5.58668E-4,1.07726E-4,1.46389,2.54289E-4  
1543.90379,5.73677E-4,1.06444E-4,1.46358,2.60685E-4  
1542.93945,4.32927E-4,9.46423E-5,1.46336,2.43864E-4  
1541.97512,3.27751E-4,7.75859E-5,1.46292,2.59315E-4  
1541.01078,4.73061E-4,9.19817E-5,1.46258,2.68237E-4  
1540.04644,4.10138E-4,8.4074E-5,1.46241,2.82584E-4  
1539.0821,3.40663E-4,7.00446E-5,1.46192,3.10112E-4  
1538.11777,6.27912E-4,9.76545E-5,1.46151,3.39717E-4  
1537.15343,8.63609E-4,1.24712E-4,1.46134,3.35838E-4  
1536.18909,0.0011,1.52334E-4,1.46123,3.29144E-4  
1535.22476,0.00117,1.55766E-4,1.46135,2.7116E-4  
1534.26042,9.39702E-4,1.49744E-4,1.46125,2.73595E-4  
1533.29608,8.29824E-4,1.37333E-4,1.46101,3.38493E-4  
1532.33174,7.1392E-4,1.17441E-4,1.46061,3.83452E-4  
1531.36741,9.61783E-4,1.34695E-4,1.4602,3.9987E-4  
1530.40307,0.00123,1.857E-4,1.46012,3.70062E-4  
1529.43873,0.00132,2.15563E-4,1.46028,3.10464E-4  
1528.4744,8.53547E-4,1.40906E-4,1.46031,2.70417E-4  
1527.51006,5.59312E-4,1.09425E-4,1.45966,2.88367E-4  
1526.54572,8.46496E-4,1.25209E-4,1.45909,3.12806E-4  
1525.58138,0.00123,1.79395E-4,1.45906,3.1691E-4  
1524.61705,0.00104,1.40963E-4,1.45905,3.91443E-4  
1523.65271,0.00119,1.59672E-4,1.45869,3.77858E-4  
1522.68837,0.00119,1.64482E-4,1.45893,3.27821E-4  
1521.72404,6.44362E-4,1.03527E-4,1.45872,3.35054E-4  
1520.7597,3.17519E-4,7.53015E-5,1.45804,3.79854E-4  
1519.79536,6.87445E-4,1.09984E-4,1.45719,4.16223E-4  
1518.83102,0.00122,1.4711E-4,1.45738,3.889E-4  
1517.86669,6.08966E-4,1.23268E-4,1.45737,3.61539E-4  
1516.90235,3.73526E-4,9.83042E-5,1.45634,4.52366E-4  
1515.93801,0.00118,2.03927E-4,1.45545,5.18132E-4  
1514.97368,0.00216,2.97392E-4,1.45584,4.23801E-4  
1514.00934,0.00176,2.29138E-4,1.45639,3.61643E-4  
1513.045,0.00153,2.15849E-4,1.45588,3.70575E-4  
1512.08066,0.00179,2.42489E-4,1.4559,3.28798E-4  
1511.11633,0.00139,1.685E-4,1.45606,3.0301E-4  
1510.15199,7.73445E-4,1.35857E-4,1.45559,3.2543E-4  
1509.18765,7.66226E-4,1.39658E-4,1.45477,3.57476E-4  
1508.22332,9.38255E-4,1.62745E-4,1.45458,3.73098E-4  
1507.25898,4.84485E-4,1.14997E-4,1.45419,4.24596E-4  
1506.29464,3.36729E-4,9.11265E-5,1.45329,4.62059E-4  
1505.3303,5.70988E-4,1.20246E-4,1.45229,5.49313E-4  
1504.36597,0.00144,1.77314E-4,1.45159,5.95155E-4  
1503.40163,0.00209,2.34126E-4,1.4517,5.71896E-4  
1502.43729,0.00223,3.15138E-4,1.4518,5.20062E-4  
1501.47296,0.00214,3.15397E-4,1.45179,4.33365E-4  
1500.50862,0.00194,2.58254E-4,1.45146,4.22506E-4  
1499.54428,0.00201,2.52409E-4,1.45104,4.06277E-4  
1498.57994,0.00204,2.30149E-4,1.45089,3.97206E-4  
1497.61561,0.00166,2.00165E-4,1.45067,4.38953E-4  
1496.65127,0.00119,1.89885E-4,1.44984,4.70975E-4  
1495.68693,0.00144,2.18105E-4,1.44867,4.69003E-4  
1494.7226,0.0021,2.22509E-4,1.4482,4.59579E-4  
1493.75826,0.00236,2.3823E-4,1.44801,4.64517E-4  
1492.79392,0.00241,2.36931E-4,1.44796,4.19967E-4  
1491.82958,0.00182,2.25206E-4,1.44772,4.22696E-4  
1490.86525,0.00111,2.11076E-4,1.4467,5.10895E-4



1489.90091,0.00111,1.98641E-4,1.44485,6.35867E-4  
1488.93657,0.00246,2.83164E-4,1.44383,6.083E-4  
1487.97224,0.00264,2.60798E-4,1.44396,5.25701E-4  
1487.0079,0.00231,2.51396E-4,1.44279,6.21593E-4  
1486.04356,0.00298,2.78411E-4,1.44155,6.60363E-4  
1485.07922,0.00365,3.08827E-4,1.44089,6.17785E-4  
1484.11489,0.00398,3.00471E-4,1.44024,6.0633E-4  
1483.15055,0.00436,3.07886E-4,1.43937,6.49798E-4  
1482.18621,0.00477,3.49455E-4,1.4386,6.8391E-4  
1481.22188,0.00498,4.0025E-4,1.43781,6.42446E-4  
1480.25754,0.00494,3.83792E-4,1.43665,6.24846E-4  
1479.2932,0.00526,3.92714E-4,1.435,6.46174E-4  
1478.32886,0.00578,4.14848E-4,1.4334,6.58611E-4  
1477.36453,0.00643,4.35633E-4,1.43147,6.58583E-4  
1476.40019,0.00747,4.22891E-4,1.42943,6.66405E-4  
1475.43585,0.00857,4.20689E-4,1.42732,7.96258E-4  
1474.47151,0.00981,5.56191E-4,1.42449,9.16222E-4  
1473.50718,0.01222,7.80618E-4,1.42086,8.64058E-4  
1472.54284,0.01639,8.92924E-4,1.41729,7.89402E-4  
1471.5785,0.02228,8.56721E-4,1.41488,9.23973E-4  
1470.61417,0.02895,7.73218E-4,1.41407,0.00106  
1469.64983,0.03662,8.49285E-4,1.41512,9.60948E-4  
1468.68549,0.04377,9.31204E-4,1.41951,7.51457E-4  
1467.72115,0.04819,9.26845E-4,1.42582,5.6495E-4  
1466.75682,0.04994,8.54591E-4,1.43214,4.74282E-4  
1465.79248,0.04988,7.74593E-4,1.43743,4.37147E-4  
1464.82814,0.04879,7.2256E-4,1.4413,3.95464E-4  
1463.86381,0.04804,7.27392E-4,1.44371,3.85294E-4  
1462.89947,0.04791,7.05639E-4,1.44622,3.36779E-4  
1461.93513,0.04735,6.71303E-4,1.44872,3.51462E-4  
1460.97079,0.047,6.77681E-4,1.4509,3.73813E-4  
1460.00646,0.04646,6.57307E-4,1.45392,3.69876E-4  
1459.04212,0.04379,6.69472E-4,1.45668,4.16486E-4  
1458.07778,0.04074,7.59055E-4,1.45621,4.85288E-4  
1457.11345,0.04121,8.49702E-4,1.45448,4.68668E-4  
1456.14911,0.04353,7.48738E-4,1.45591,6.16867E-4  
1455.18477,0.04351,7.40787E-4,1.4594,4.11841E-4  
1454.22043,0.04171,6.4988E-4,1.46197,2.52566E-4  
1453.2561,0.03918,5.91422E-4,1.46355,2.3538E-4  
1452.29176,0.03652,5.87624E-4,1.46358,3.05619E-4  
1451.32742,0.03502,5.80794E-4,1.46266,3.46217E-4  
1450.36309,0.03447,5.81441E-4,1.46203,3.21775E-4  
1449.39875,0.03397,5.50648E-4,1.46177,2.80324E-4  
1448.43441,0.03353,5.27075E-4,1.46142,2.88334E-4  
1447.47007,0.03325,5.38244E-4,1.46092,4.19526E-4  
1446.50574,0.03354,5.88194E-4,1.46043,4.21547E-4  
1445.5414,0.0339,6.04072E-4,1.46044,4.15305E-4  
1444.57706,0.03436,6.55531E-4,1.46055,4.06065E-4  
1443.61273,0.0346,6.64149E-4,1.46119,3.23803E-4  
1442.64839,0.0344,6.01384E-4,1.46149,3.08099E-4  
1441.68405,0.0345,5.83495E-4,1.4615,3.44666E-4  
1440.71971,0.03509,6.27443E-4,1.4618,3.60153E-4  
1439.75538,0.03525,6.40795E-4,1.46278,3.32011E-4  
1438.79104,0.03508,6.32754E-4,1.46346,3.85735E-4  
1437.8267,0.03432,7.27794E-4,1.46451,4.13557E-4  
1436.86237,0.03272,8.4283E-4,1.46364,2.77348E-4  
1435.89803,0.03388,7.5631E-4,1.46184,3.04674E-4  
1434.93369,0.03605,6.82866E-4,1.46256,2.95987E-4  
1433.96935,0.03674,6.4336E-4,1.46439,2.6481E-4  
1433.00502,0.03648,6.29851E-4,1.46594,2.69733E-4  
1432.04068,0.03573,6.17164E-4,1.4671,2.53088E-4  
1431.07634,0.03474,6.2283E-4,1.46766,2.34476E-4  
1430.11201,0.034,6.27131E-4,1.46755,2.40621E-4  
1429.14767,0.03402,5.86545E-4,1.46749,2.69641E-4  
1428.18333,0.03382,5.89174E-4,1.46798,2.74591E-4

1427.21899,0.03341,5.87356E-4,1.46804,2.49867E-4  
1426.25466,0.03332,5.69296E-4,1.46806,2.47189E-4  
1425.29032,0.03331,5.74669E-4,1.46824,3.06875E-4  
1424.32598,0.03298,6.25281E-4,1.46838,3.21779E-4  
1423.36165,0.03308,6.59564E-4,1.46788,2.78072E-4  
1422.39731,0.03391,6.41943E-4,1.46809,2.68723E-4  
1421.43297,0.03437,6.5403E-4,1.46922,2.98135E-4  
1420.46863,0.03278,7.39316E-4,1.47053,2.86865E-4  
1419.5043,0.03091,8.16637E-4,1.46806,2.37292E-4  
1418.53996,0.03356,7.36421E-4,1.46562,2.87287E-4  
1417.57562,0.03609,7.14315E-4,1.4663,2.91516E-4  
1416.61129,0.03797,6.78044E-4,1.467,3.7441E-4  
1415.64695,0.04003,6.28354E-4,1.46847,4.06852E-4  
1414.68261,0.04177,5.94017E-4,1.4706,4.08214E-4  
1413.71827,0.04297,5.76937E-4,1.4734,4.09897E-4  
1412.75394,0.0435,5.87292E-4,1.47654,4.14033E-4  
1411.7896,0.04315,6.03177E-4,1.47996,3.70826E-4  
1410.82526,0.04198,6.03773E-4,1.48309,3.41424E-4  
1409.86093,0.04019,6.08121E-4,1.48593,3.29426E-4  
1408.89659,0.03789,5.74608E-4,1.48825,3.57391E-4  
1407.93225,0.03523,5.28339E-4,1.48996,3.78793E-4  
1406.96791,0.03269,5.06024E-4,1.49095,4.12751E-4  
1406.00358,0.03025,4.77484E-4,1.49194,4.00318E-4  
1405.03924,0.02735,4.59726E-4,1.49228,3.30694E-4  
1404.0749,0.02525,4.80022E-4,1.49176,3.329E-4  
1403.11057,0.02386,5.34772E-4,1.49197,2.97132E-4  
1402.14623,0.02172,5.09421E-4,1.49256,3.1562E-4  
1401.18189,0.01934,4.60417E-4,1.49281,3.44291E-4  
1400.21755,0.01593,4.6094E-4,1.4931,3.60906E-4  
1399.25322,0.01175,5.48812E-4,1.49067,2.80817E-4  
1398.28888,0.01092,5.09445E-4,1.48678,3.70736E-4  
1397.32454,0.01154,4.07409E-4,1.48547,4.82873E-4  
1396.36021,0.01079,4.06002E-4,1.48501,4.84622E-4  
1395.39587,0.00959,5.24004E-4,1.48393,3.58673E-4  
1394.43153,0.0087,5.20874E-4,1.48223,3.66567E-4  
1393.46719,0.00876,3.84579E-4,1.4805,4.87092E-4  
1392.50286,0.00916,3.85616E-4,1.47981,4.33461E-4  
1391.53852,0.00871,4.25043E-4,1.47944,3.7773E-4  
1390.57418,0.0082,4.50233E-4,1.47854,3.24709E-4  
1389.60984,0.00782,4.18598E-4,1.4777,2.61497E-4  
1388.64551,0.00752,3.61362E-4,1.47673,2.72275E-4  
1387.68117,0.00711,3.73769E-4,1.47602,2.59813E-4  
1386.71683,0.00637,3.55376E-4,1.47456,3.42435E-4  
1385.7525,0.00682,3.63218E-4,1.47275,3.54334E-4  
1384.78816,0.00756,3.58289E-4,1.47188,3.76138E-4  
1383.82382,0.00795,3.88227E-4,1.47111,3.89375E-4  
1382.85948,0.00845,4.32309E-4,1.47026,3.67997E-4  
1381.89515,0.00919,4.49106E-4,1.46943,3.3671E-4  
1380.93081,0.01026,4.49584E-4,1.46884,3.13984E-4  
1379.96647,0.01158,4.40717E-4,1.46886,2.95166E-4  
1379.00214,0.01253,4.48021E-4,1.46966,3.14303E-4  
1378.0378,0.01268,4.55783E-4,1.47061,3.383E-4  
1377.07346,0.01248,4.6099E-4,1.47139,4.11091E-4  
1376.10912,0.01175,5.24775E-4,1.47224,4.64681E-4  
1375.14479,0.01019,6.64671E-4,1.47241,4.04878E-4  
1374.18045,0.00882,7.4849E-4,1.47111,2.37028E-4  
1373.21611,0.00912,5.8978E-4,1.46934,3.03728E-4  
1372.25178,0.01025,4.4334E-4,1.46901,2.45406E-4  
1371.28744,0.01044,4.19143E-4,1.46947,2.11452E-4  
1370.3231,0.01006,4.22278E-4,1.46946,2.29806E-4  
1369.35876,0.00997,4.40195E-4,1.46916,2.33819E-4  
1368.39443,0.00988,4.46532E-4,1.46925,2.17554E-4  
1367.43009,0.00926,4.08294E-4,1.46912,2.25995E-4  
1366.46575,0.00892,3.89333E-4,1.4685,2.30434E-4  
1365.50142,0.00895,3.85287E-4,1.46824,2.328E-4

1364.53708,0.00828,4.03881E-4,1.46834,2.77576E-4  
1363.57274,0.00703,4.84675E-4,1.46722,3.15896E-4  
1362.6084,0.00727,5.31259E-4,1.46533,3.76519E-4  
1361.64407,0.00819,5.66369E-4,1.46466,3.66126E-4  
1360.67973,0.0085,5.34664E-4,1.46428,3.25231E-4  
1359.71539,0.00888,4.57399E-4,1.46382,3.09605E-4  
1358.75106,0.00908,4.3759E-4,1.46347,2.72871E-4  
1357.78672,0.00939,4.30471E-4,1.46282,2.50915E-4  
1356.82238,0.0101,4.22551E-4,1.4625,2.75801E-4  
1355.85804,0.0104,4.29266E-4,1.46267,2.68723E-4  
1354.89371,0.01024,4.58982E-4,1.4624,2.79769E-4  
1353.92937,0.01054,4.98135E-4,1.46187,3.14806E-4  
1352.96503,0.01078,4.90704E-4,1.46169,2.7393E-4  
1352.0007,0.01092,4.45104E-4,1.46115,2.38686E-4  
1351.03636,0.01155,4.10848E-4,1.46072,2.33306E-4  
1350.07202,0.01202,3.84185E-4,1.46074,2.57951E-4  
1349.10768,0.01228,3.97871E-4,1.46059,3.42254E-4  
1348.14335,0.01273,4.27174E-4,1.46053,4.64556E-4  
1347.17901,0.01287,4.89261E-4,1.46073,4.97941E-4  
1346.21467,0.01269,5.56264E-4,1.46053,4.52906E-4  
1345.25034,0.01291,5.98289E-4,1.45999,3.77202E-4  
1344.286,0.01346,5.92252E-4,1.45971,3.07884E-4  
1343.32166,0.014,5.40891E-4,1.4597,2.72842E-4  
1342.35732,0.01454,5.06749E-4,1.45993,2.66018E-4  
1341.39299,0.01468,5.17603E-4,1.46063,2.69267E-4  
1340.42865,0.01394,5.32021E-4,1.461,2.72948E-4  
1339.46431,0.01339,5.73848E-4,1.46035,3.14421E-4  
1338.49998,0.01357,6.65605E-4,1.45999,2.69598E-4  
1337.53564,0.0131,6.18458E-4,1.45978,2.8383E-4  
1336.5713,0.01297,5.05553E-4,1.45854,3.36073E-4  
1335.60696,0.01406,4.70539E-4,1.45783,3.15826E-4  
1334.64263,0.01474,4.69223E-4,1.45829,2.67162E-4  
1333.67829,0.01437,4.73848E-4,1.45868,2.77788E-4  
1332.71395,0.01369,4.95275E-4,1.45822,3.25143E-4  
1331.74962,0.01347,5.2638E-4,1.45722,3.46809E-4  
1330.78528,0.01364,5.29861E-4,1.45618,3.34054E-4  
1329.82094,0.0142,5.04399E-4,1.45508,3.22477E-4  
1328.8566,0.01521,4.978E-4,1.4543,3.30215E-4  
1327.89227,0.01617,5.03753E-4,1.45398,3.44447E-4  
1326.92773,0.017,5.16117E-4,1.45376,3.62954E-4  
1325.96359,0.01784,5.6137E-4,1.45373,3.79422E-4  
1324.99926,0.01838,6.22432E-4,1.45398,3.36344E-4  
1324.03492,0.01837,5.91692E-4,1.45389,3.42301E-4  
1323.07058,0.0187,5.61247E-4,1.45309,3.44215E-4  
1322.10624,0.01981,5.50889E-4,1.45248,3.33264E-4  
1321.14191,0.02104,5.33063E-4,1.45255,3.23252E-4  
1320.17757,0.02185,5.55986E-4,1.45305,3.3927E-4  
1319.21323,0.0222,6.13568E-4,1.4535,3.86695E-4  
1318.2489,0.02223,6.33539E-4,1.45374,4.41484E-4  
1317.28456,0.0221,6.29018E-4,1.45337,4.70771E-4  
1316.32022,0.02261,6.37749E-4,1.4526,4.43429E-4  
1315.35588,0.02354,6.48025E-4,1.45227,3.94062E-4  
1314.39155,0.02425,6.3051E-4,1.4521,3.64086E-4  
1313.42721,0.02512,6.16044E-4,1.45173,3.46581E-4  
1312.46287,0.02635,6.2501E-4,1.45162,4.30484E-4  
1311.49854,0.02756,6.64548E-4,1.45193,5.75066E-4  
1310.5342,0.02848,7.88525E-4,1.45256,5.86103E-4  
1309.56986,0.02889,9.05293E-4,1.45317,4.11063E-4  
1308.60552,0.02913,8.45234E-4,1.4532,3.60566E-4  
1307.64119,0.02992,7.38646E-4,1.45296,3.88406E-4  
1306.67685,0.03105,6.94374E-4,1.45305,3.4109E-4  
1305.71251,0.03233,6.94502E-4,1.45355,2.76243E-4  
1304.74818,0.03323,7.09023E-4,1.45466,2.79502E-4  
1303.78384,0.03336,6.98758E-4,1.45554,3.75374E-4  
1302.8195,0.03354,6.78605E-4,1.45588,4.81896E-4

1301.85516,0.03383,7.18977E-4,1.45612,4.50724E-4  
1300.89083,0.03432,7.31622E-4,1.45605,3.88513E-4  
1299.92649,0.03539,7.18585E-4,1.45616,3.41853E-4  
1298.96215,0.03647,7.07981E-4,1.45678,2.93571E-4  
1297.99781,0.03743,7.10542E-4,1.45774,3.1833E-4  
1297.03348,0.03786,7.15636E-4,1.45908,3.85677E-4  
1296.06914,0.03755,7.13095E-4,1.45999,4.60497E-4  
1295.1048,0.0373,7.32427E-4,1.46008,4.83023E-4  
1294.14047,0.03763,7.48738E-4,1.45972,4.31333E-4  
1293.17613,0.03882,7.67071E-4,1.45945,3.65803E-4  
1292.21179,0.04047,7.70641E-4,1.46003,3.27607E-4  
1291.24745,0.04175,7.29048E-4,1.46133,3.42444E-4  
1290.28312,0.04258,7.04079E-4,1.46282,4.2404E-4  
1289.31878,0.04302,7.11164E-4,1.46437,5.05035E-4  
1288.35444,0.0431,7.33926E-4,1.46569,5.49263E-4  
1287.39011,0.04325,7.74105E-4,1.4667,5.34882E-4  
1286.42577,0.0436,7.51751E-4,1.46779,4.91219E-4  
1285.46143,0.04387,6.57846E-4,1.469,4.17257E-4  
1284.49709,0.04429,5.83116E-4,1.47021,3.85797E-4  
1283.53276,0.04486,5.61747E-4,1.47195,4.84734E-4  
1282.56842,0.04488,6.36007E-4,1.47436,5.32153E-4  
1281.60408,0.04382,7.29462E-4,1.47682,5.02847E-4  
1280.63975,0.04196,7.9918E-4,1.47846,4.67324E-4  
1279.67541,0.04027,8.72242E-4,1.47911,4.2223E-4  
1278.71107,0.03913,8.60567E-4,1.47957,4.20611E-4  
1277.74673,0.03801,7.11429E-4,1.48015,4.69929E-4  
1276.7824,0.03687,5.54294E-4,1.48053,4.19108E-4  
1275.81806,0.0358,4.81312E-4,1.48088,3.04814E-4  
1274.85372,0.0346,4.87215E-4,1.48111,2.93623E-4  
1273.88939,0.03339,5.25879E-4,1.48106,4.07025E-4  
1272.92505,0.03233,6.1675E-4,1.48072,4.36169E-4  
1271.96071,0.03158,7.23026E-4,1.48027,3.62741E-4  
1270.99637,0.03091,7.18406E-4,1.47981,3.38595E-4  
1270.03204,0.0305,6.10875E-4,1.47904,3.55472E-4  
1269.0677,0.03084,5.43111E-4,1.47858,2.83807E-4  
1268.10336,0.03093,5.1635E-4,1.47897,2.36648E-4  
1267.13903,0.03036,5.3794E-4,1.4792,3.35012E-4  
1266.17469,0.02976,6.12226E-4,1.47906,4.67212E-4  
1265.21035,0.02919,7.34998E-4,1.47863,4.49301E-4  
1264.24601,0.02903,8.09191E-4,1.47789,3.21291E-4  
1263.28168,0.02937,7.2611E-4,1.47735,3.24622E-4  
1262.31734,0.02991,6.06561E-4,1.47718,3.29362E-4  
1261.353,0.03048,5.87482E-4,1.47757,2.59462E-4  
1260.38867,0.03039,5.96297E-4,1.47834,2.24569E-4  
1259.42433,0.02976,6.05125E-4,1.47871,3.14334E-4  
1258.45999,0.02902,6.23851E-4,1.47861,4.19432E-4  
1257.49565,0.02849,6.80361E-4,1.47798,3.9847E-4  
1256.53132,0.0284,6.74584E-4,1.47713,3.42246E-4  
1255.56698,0.02889,6.09556E-4,1.47611,3.11249E-4  
1254.60264,0.03027,5.8198E-4,1.47564,3.72091E-4  
1253.63831,0.03151,6.6286E-4,1.47626,3.48269E-4  
1252.67397,0.0321,7.36636E-4,1.47718,3.85353E-4  
1251.70963,0.03231,7.79862E-4,1.47822,4.81412E-4  
1250.74529,0.03176,7.57335E-4,1.47907,5.17658E-4  
1249.78096,0.03118,7.68943E-4,1.47887,4.52289E-4  
1248.81662,0.03159,7.70628E-4,1.47844,3.819E-4  
1247.85228,0.03243,6.58537E-4,1.47865,3.99012E-4  
1246.88795,0.03315,5.8757E-4,1.47933,3.35487E-4  
1245.92361,0.03382,5.73496E-4,1.48031,3.56192E-4  
1244.95927,0.03419,6.58453E-4,1.48192,4.89223E-4  
1243.99493,0.03353,8.10752E-4,1.48367,5.25779E-4  
1243.0306,0.03237,9.50796E-4,1.48474,4.25233E-4  
1242.06626,0.03103,8.78819E-4,1.48542,5.49176E-4  
1241.10192,0.02959,6.51156E-4,1.48517,6.40592E-4  
1240.13759,0.02933,5.90616E-4,1.48447,4.78495E-4

1239.17325,0.02951,5.46138E-4,1.48484,3.54463E-4  
1238.20891,0.02879,5.2928E-4,1.48553,3.03777E-4  
1237.24457,0.02768,5.27982E-4,1.4855,4.1234E-4  
1236.28024,0.02699,5.60948E-4,1.485,5.38935E-4  
1235.3159,0.02653,7.02709E-4,1.48446,5.21301E-4  
1234.35156,0.02641,8.20848E-4,1.48361,3.92529E-4  
1233.38723,0.02708,7.97913E-4,1.48303,3.44841E-4  
1232.42289,0.02778,6.79302E-4,1.48328,3.96145E-4  
1231.45855,0.02795,5.72278E-4,1.48379,3.692E-4  
1230.49421,0.02793,5.57694E-4,1.48409,2.81749E-4  
1229.52988,0.02798,5.92423E-4,1.48444,3.71074E-4  
1228.56554,0.02777,6.77276E-4,1.48488,3.83794E-4  
1227.6012,0.02738,7.04273E-4,1.48493,3.67904E-4  
1226.63687,0.0274,6.97403E-4,1.48476,3.89367E-4  
1225.67253,0.0276,6.03805E-4,1.48479,4.84403E-4  
1224.70819,0.02802,5.61841E-4,1.48484,4.18256E-4  
1223.74385,0.02875,5.81141E-4,1.48546,2.91059E-4  
1222.77952,0.02886,5.4458E-4,1.4868,3.575E-4  
1221.81518,0.02803,5.29931E-4,1.48782,4.38031E-4  
1220.85084,0.02711,5.71898E-4,1.48801,4.9649E-4  
1219.88651,0.0266,6.72429E-4,1.48786,4.56407E-4  
1218.92217,0.02641,6.9799E-4,1.48758,4.02059E-4  
1217.95783,0.02675,6.32893E-4,1.48727,3.58951E-4  
1216.99349,0.0277,5.64419E-4,1.4876,3.14887E-4  
1216.02916,0.0283,5.55539E-4,1.48896,3.11206E-4  
1215.06482,0.02797,5.60819E-4,1.49053,3.68865E-4  
1214.10048,0.02693,5.94543E-4,1.49181,4.27431E-4  
1213.13615,0.02546,6.58278E-4,1.49226,4.39138E-4  
1212.17181,0.02458,6.79156E-4,1.49187,4.24849E-4  
1211.20747,0.02452,6.27654E-4,1.49175,4.24945E-4  
1210.24313,0.02448,5.46035E-4,1.49212,4.39592E-4  
1209.2788,0.02439,5.14459E-4,1.49275,3.83101E-4  
1208.31446,0.02398,4.96866E-4,1.49372,3.80628E-4  
1207.35012,0.02313,5.2697E-4,1.49466,4.72797E-4  
1206.38578,0.02181,5.98898E-4,1.49545,4.98947E-4  
1205.42145,0.02015,6.27412E-4,1.49546,5.14242E-4  
1204.45711,0.01912,6.61551E-4,1.4949,4.77281E-4  
1203.49277,0.01851,6.08733E-4,1.4945,4.35828E-4  
1202.52844,0.01813,5.34862E-4,1.49417,4.04167E-4  
1201.5641,0.01799,5.02171E-4,1.49428,3.58466E-4  
1200.59976,0.0174,5.07098E-4,1.4948,3.23482E-4  
1199.63542,0.01633,5.64385E-4,1.49512,3.73409E-4  
1198.67109,0.01496,5.95832E-4,1.495,4.35972E-4  
1197.70675,0.01375,6.0329E-4,1.49423,4.49775E-4  
1196.74241,0.01312,6.12338E-4,1.49313,4.29616E-4  
1195.77808,0.01317,6.06562E-4,1.49211,3.86116E-4  
1194.81374,0.0138,5.42424E-4,1.4918,3.89797E-4  
1193.8494,0.01391,4.73521E-4,1.4925,3.68117E-4  
1192.88506,0.01298,4.71214E-4,1.49293,3.45696E-4  
1191.92073,0.01217,4.68549E-4,1.49269,4.54976E-4  
1190.95639,0.01142,5.42793E-4,1.49255,4.66268E-4  
1189.99205,0.01039,5.73498E-4,1.49202,4.4898E-4  
1189.02772,0.00981,5.3364E-4,1.49088,4.46957E-4  
1188.06338,0.01009,5.15811E-4,1.48984,3.98114E-4  
1187.09904,0.01064,4.9349E-4,1.48967,3.61548E-4  
1186.1347,0.01063,4.58632E-4,1.48989,3.51625E-4  
1185.17037,0.0104,4.5139E-4,1.48998,3.91849E-4  
1184.20603,0.00986,4.99476E-4,1.49016,4.24824E-4  
1183.24169,0.00901,5.57503E-4,1.48971,4.52158E-4  
1182.27736,0.00886,6.58497E-4,1.48893,4.08856E-4  
1181.31302,0.00886,6.53513E-4,1.48862,3.92268E-4  
1180.34868,0.00879,5.3766E-4,1.48821,4.24505E-4  
1179.38434,0.00899,4.55E-4,1.48806,3.89128E-4  
1178.42001,0.00884,4.3246E-4,1.48819,3.07391E-4  
1177.45567,0.00853,4.49537E-4,1.48809,3.48762E-4

1176.49133,0.00828,4.5283E-4,1.48806,4.80848E-4  
1175.527,0.00763,5.17872E-4,1.48799,4.61231E-4  
1174.56266,0.00697,5.14749E-4,1.48722,4.29888E-4  
1173.59832,0.0071,4.9937E-4,1.48628,4.07611E-4  
1172.63398,0.00752,4.66991E-4,1.48588,3.72472E-4  
1171.66965,0.00784,4.36753E-4,1.48571,3.35432E-4  
1170.70531,0.00821,4.47557E-4,1.48587,3.44997E-4  
1169.74097,0.00804,4.81003E-4,1.48636,3.78466E-4  
1168.77664,0.00746,5.29636E-4,1.48638,3.98094E-4  
1167.8123,0.00706,5.89243E-4,1.48613,3.81347E-4  
1166.84796,0.00667,5.74434E-4,1.48578,3.97101E-4  
1165.88362,0.00645,5.17366E-4,1.48515,3.78598E-4  
1164.91929,0.00675,4.93449E-4,1.48448,3.40289E-4  
1163.95495,0.00746,4.80072E-4,1.48439,3.4263E-4  
1162.99061,0.00774,4.71474E-4,1.48506,3.0456E-4  
1162.02628,0.00716,4.66212E-4,1.48559,3.2298E-4  
1161.06194,0.00647,5.07765E-4,1.48549,3.69342E-4  
1160.0976,0.00598,5.60024E-4,1.48517,3.85595E-4  
1159.13326,0.00567,5.45101E-4,1.48476,4.00703E-4  
1158.16893,0.00538,4.49552E-4,1.48437,4.24674E-4  
1157.20459,0.00521,4.26289E-4,1.48367,3.62238E-4  
1156.24025,0.00569,4.29204E-4,1.4831,3.70072E-4  
1155.27592,0.00617,4.48684E-4,1.48333,3.725E-4  
1154.31158,0.00591,4.49208E-4,1.48366,3.91065E-4  
1153.34724,0.00556,5.1136E-4,1.48354,3.93718E-4  
1152.3829,0.0053,5.80987E-4,1.48341,3.62601E-4  
1151.41857,0.00492,5.14662E-4,1.4831,3.97607E-4  
1150.45423,0.00475,4.17304E-4,1.48251,3.86412E-4  
1149.48989,0.00505,4.11578E-4,1.48199,3.41297E-4  
1148.52556,0.00549,4.24392E-4,1.48198,3.34668E-4  
1147.56122,0.00553,4.22469E-4,1.48237,3.2398E-4  
1146.59688,0.00495,4.25988E-4,1.48251,3.48813E-4  
1145.63254,0.0045,4.62581E-4,1.48191,4.23467E-4  
1144.66821,0.00473,5.42871E-4,1.48138,4.19532E-4  
1143.70387,0.00501,5.55759E-4,1.48133,3.93639E-4  
1142.73953,0.005,4.63784E-4,1.48147,4.27221E-4  
1141.7752,0.00476,3.94546E-4,1.48142,4.0182E-4  
1140.81086,0.00468,3.95114E-4,1.48127,3.20013E-4  
1139.84652,0.00451,3.81381E-4,1.48134,3.24888E-4  
1138.88218,0.004,3.736E-4,1.48114,4.01957E-4  
1137.91785,0.00386,4.22978E-4,1.48056,4.39882E-4  
1136.95351,0.00394,4.62795E-4,1.48037,3.82514E-4  
1135.98917,0.00367,4.29389E-4,1.48011,3.80634E-4  
1135.02484,0.00362,4.32957E-4,1.47956,3.98182E-4  
1134.0605,0.00382,4.35454E-4,1.47917,3.50742E-4  
1133.09616,0.00408,4.31893E-4,1.47899,3.14411E-4  
1132.13182,0.0041,4.52003E-4,1.47904,3.63584E-4  
1131.16749,0.00388,4.36195E-4,1.47888,4.11331E-4  
1130.20315,0.00369,4.33298E-4,1.4786,3.8536E-4  
1129.23881,0.0034,4.10077E-4,1.47801,3.86206E-4  
1128.27448,0.00369,4.03921E-4,1.47707,3.97279E-4  
1127.31014,0.00446,4.18261E-4,1.47667,3.71941E-4  
1126.3458,0.005,4.25143E-4,1.47666,3.54019E-4  
1125.38146,0.00535,4.46388E-4,1.47668,3.51912E-4  
1124.41713,0.00571,4.82199E-4,1.47665,3.59918E-4  
1123.45279,0.00615,5.27863E-4,1.47675,3.96106E-4  
1122.48845,0.00647,5.60083E-4,1.47711,3.95806E-4  
1121.52411,0.00639,5.52318E-4,1.47748,3.68023E-4  
1120.55978,0.00621,5.15015E-4,1.47739,3.42014E-4  
1119.59544,0.00652,4.98186E-4,1.47714,3.28554E-4  
1118.6311,0.00711,5.23879E-4,1.4774,3.05545E-4  
1117.66677,0.00733,5.17998E-4,1.47816,2.83418E-4  
1116.70243,0.00693,4.85054E-4,1.47885,3.10934E-4  
1115.73809,0.00634,4.98463E-4,1.47906,3.95407E-4  
1114.77375,0.00591,5.64048E-4,1.47911,4.04445E-4

1113.80942,0.00538,5.47189E-4,1.47908,3.89748E-4  
1112.84508,0.00499,4.7496E-4,1.47875,3.88849E-4  
1111.88074,0.00483,4.18204E-4,1.47845,3.78549E-4  
1110.91641,0.00473,4.04824E-4,1.47821,3.48237E-4  
1109.95207,0.00464,3.8994E-4,1.478,3.87722E-4  
1108.98773,0.00469,4.19932E-4,1.47777,4.50643E-4  
1108.02339,0.00479,5.25889E-4,1.47797,4.1655E-4  
1107.05906,0.00417,5.18739E-4,1.47821,3.85138E-4  
1106.09472,0.00342,4.53503E-4,1.47754,3.85218E-4  
1105.13038,0.0035,4.48651E-4,1.47664,3.72522E-4  
1104.16605,0.00379,3.88629E-4,1.47619,3.70445E-4  
1103.20171,0.00408,3.48949E-4,1.47575,3.3373E-4  
1102.23737,0.00464,3.95156E-4,1.47558,3.34309E-4  
1101.27303,0.00487,4.42887E-4,1.4758,3.31155E-4  
1100.3087,0.00486,4.68851E-4,1.47571,3.33618E-4  
1099.34436,0.00511,5.21198E-4,1.47572,3.16439E-4  
1098.38002,0.00496,4.87636E-4,1.47587,3.68091E-4  
1097.41569,0.00482,4.54116E-4,1.47553,3.72375E-4  
1096.45135,0.005,4.32771E-4,1.47523,3.81495E-4  
1095.48701,0.00532,4.46006E-4,1.47492,3.59871E-4  
1094.52267,0.00596,4.56588E-4,1.47497,3.91136E-4  
1093.55834,0.00619,4.62629E-4,1.47548,4.05208E-4  
1092.594,0.006,4.56202E-4,1.47568,4.22309E-4  
1091.62966,0.00607,4.96564E-4,1.47564,4.24046E-4  
1090.66533,0.0062,5.31982E-4,1.47588,3.67125E-4  
1089.70099,0.00606,4.95586E-4,1.47612,3.48242E-4  
1088.73665,0.00591,4.66396E-4,1.4762,3.27083E-4  
1087.77231,0.00578,4.57898E-4,1.47627,3.16324E-4  
1086.80798,0.00558,4.59991E-4,1.47625,3.40796E-4  
1085.84364,0.00556,4.43061E-4,1.47613,4.40641E-4  
1084.8793,0.00562,4.63223E-4,1.47623,4.83165E-4  
1083.91497,0.00547,4.89158E-4,1.47639,4.79718E-4  
1082.95063,0.00524,5.06473E-4,1.47641,4.32093E-4  
1081.98629,0.00513,5.11884E-4,1.47637,4.06035E-4  
1081.02195,0.00493,4.72755E-4,1.47644,4.11567E-4  
1080.05762,0.00464,4.09236E-4,1.47632,4.22859E-4  
1079.09328,0.00452,4.25908E-4,1.47616,4.3889E-4  
1078.12894,0.00435,4.38502E-4,1.47601,5.15623E-4  
1077.16461,0.00437,4.58496E-4,1.47576,5.35573E-4  
1076.20027,0.00447,5.01188E-4,1.47589,4.62465E-4  
1075.23593,0.00402,4.72114E-4,1.47595,4.35604E-4  
1074.27159,0.00394,4.69575E-4,1.47547,4.37525E-4  
1073.30726,0.00416,4.92169E-4,1.47565,3.82744E-4  
1072.34292,0.00355,4.02545E-4,1.47573,3.62892E-4  
1071.37858,0.00337,3.79949E-4,1.47508,3.6335E-4  
1070.41425,0.00367,4.10949E-4,1.47502,3.68731E-4  
1069.44991,0.00334,4.01655E-4,1.47512,3.8977E-4  
1068.48557,0.00306,4.03322E-4,1.4747,4.35357E-4  
1067.52123,0.00306,4.21717E-4,1.47438,4.03188E-4  
1066.5569,0.00302,3.86712E-4,1.47401,3.99718E-4  
1065.59256,0.00329,3.93344E-4,1.4737,4.11368E-4  
1064.62822,0.00343,4.05892E-4,1.47375,4.00157E-4  
1063.66389,0.00326,3.95748E-4,1.47359,4.15755E-4  
1062.69955,0.00346,3.79682E-4,1.47318,4.85078E-4  
1061.73521,0.00389,4.43279E-4,1.47337,4.66979E-4  
1060.77087,0.0035,4.52271E-4,1.47374,4.20835E-4  
1059.80654,0.0031,4.25354E-4,1.4732,4.23776E-4  
1058.8422,0.00347,4.84619E-4,1.47288,4.12721E-4  
1057.87786,0.00343,4.52728E-4,1.47306,4.07404E-4  
1056.91353,0.00318,3.61052E-4,1.4727,3.92847E-4  
1055.94919,0.00347,3.81901E-4,1.47235,3.95667E-4  
1054.98485,0.00366,4.44495E-4,1.47242,4.06707E-4  
1054.02051,0.00365,4.82487E-4,1.4724,4.17427E-4  
1053.05618,0.00369,4.73797E-4,1.47242,4.27116E-4  
1052.09184,0.00349,4.06007E-4,1.47245,4.46095E-4

1051.1275,0.00331,3.58668E-4,1.4722,4.61176E-4  
1050.16317,0.00329,3.50737E-4,1.47197,4.78853E-4  
1049.19883,0.00323,3.74068E-4,1.47176,4.60091E-4  
1048.23449,0.00319,3.76164E-4,1.47145,4.34698E-4  
1047.27015,0.00333,3.72354E-4,1.47107,4.37287E-4  
1046.30582,0.00364,3.93929E-4,1.47089,4.47228E-4  
1045.34148,0.0038,4.11634E-4,1.47089,4.30966E-4  
1044.37714,0.00382,4.27328E-4,1.47077,4.22673E-4  
1043.41281,0.00405,4.60507E-4,1.47056,4.30417E-4  
1042.44847,0.00433,4.85086E-4,1.47067,4.02437E-4  
1041.48413,0.00428,4.73503E-4,1.47082,3.73282E-4  
1040.51979,0.00422,4.7242E-4,1.4707,3.64683E-4  
1039.55546,0.00439,4.87848E-4,1.47064,3.74547E-4  
1038.59112,0.00441,4.73934E-4,1.47089,3.78087E-4  
1037.62678,0.00401,4.56883E-4,1.47096,3.74026E-4  
1036.66245,0.0037,4.51088E-4,1.47053,4.11616E-4  
1035.69811,0.00381,4.43589E-4,1.47003,4.70809E-4  
1034.73377,0.00417,4.54698E-4,1.46975,4.98333E-4  
1033.76943,0.00462,4.71566E-4,1.46981,4.99938E-4  
1032.8051,0.00469,4.7909E-4,1.47024,4.40946E-4  
1031.84076,0.00425,4.66334E-4,1.47032,4.13347E-4  
1030.87642,0.00408,4.64407E-4,1.46991,4.65363E-4  
1029.91208,0.00432,4.80663E-4,1.46971,5.30215E-4  
1028.94775,0.00436,4.79384E-4,1.46983,5.34464E-4  
1027.98341,0.00415,4.51478E-4,1.46971,5.41026E-4  
1027.01907,0.00423,4.36732E-4,1.46942,5.80359E-4  
1026.05474,0.00438,4.4631E-4,1.4694,5.62926E-4  
1025.0904,0.00442,4.61526E-4,1.46943,5.25974E-4  
1024.12606,0.0043,4.48347E-4,1.46956,4.93435E-4  
1023.16172,0.004,4.23571E-4,1.46938,5.06169E-4  
1022.19739,0.00399,4.19973E-4,1.46919,5.01505E-4  
1021.23305,0.00375,4.23771E-4,1.4691,4.761E-4  
1020.26871,0.00356,4.08761E-4,1.46864,5.5969E-4  
1019.30438,0.00372,4.26057E-4,1.4682,6.65083E-4  
1018.34004,0.00399,4.21004E-4,1.46803,7.32767E-4  
1017.3757,0.00408,4.3758E-4,1.46804,7.44067E-4  
1016.41136,0.004,4.96161E-4,1.46802,6.63394E-4  
1015.44703,0.00375,4.58894E-4,1.46783,5.98645E-4  
1014.48269,0.0036,4.06429E-4,1.46728,6.44026E-4  
1013.51835,0.00397,4.03355E-4,1.46667,7.52374E-4  
1012.55402,0.00458,4.51341E-4,1.46664,7.81707E-4  
1011.58968,0.00467,4.99421E-4,1.46687,7.3248E-4  
1010.62534,0.00476,5.4238E-4,1.46679,7.37586E-4  
1009.661,0.00485,5.96425E-4,1.46715,6.57872E-4  
1008.69667,0.0041,5.20689E-4,1.46721,5.76885E-4  
1007.73233,0.00387,5.09994E-4,1.46625,6.93972E-4  
1006.76799,0.00456,6.13622E-4,1.466,6.83153E-4  
1005.80366,0.00438,5.54827E-4,1.46629,5.69095E-4  
1004.83932,0.00423,4.89242E-4,1.46575,6.27518E-4  
1003.87498,0.00462,5.06642E-4,1.46576,6.07374E-4  
1002.91064,0.00418,4.48998E-4,1.466,5.90356E-4  
1001.94631,0.00357,4.03796E-4,1.46544,6.80444E-4  
1000.98197,0.00347,4.23256E-4,1.46459,7.41858E-4  
1000.01763,0.00376,4.69685E-4,1.4638,7.87214E-4  
999.0533,0.00433,5.3847E-4,1.46337,7.65339E-4  
998.08896,0.0046,5.40752E-4,1.46326,6.96795E-4  
997.12462,0.00478,5.007E-4,1.46283,7.50505E-4  
996.16028,0.00533,5.43295E-4,1.46259,7.8328E-4  
995.19595,0.00566,6.12439E-4,1.46276,7.277E-4  
994.23161,0.00556,6.27132E-4,1.46298,6.69706E-4  
993.26727,0.00498,5.6151E-4,1.4628,6.46252E-4  
992.30294,0.00461,5.11428E-4,1.46175,7.22873E-4  
991.3386,0.00528,5.5821E-4,1.46059,8.12412E-4  
990.37426,0.00638,6.40454E-4,1.46036,7.58406E-4  
989.40992,0.00686,6.32306E-4,1.46075,6.67461E-4



988.44559,0.00667,5.73652E-4,1.46079,6.50504E-4  
987.48125,0.0067,5.20865E-4,1.46032,7.57689E-4  
986.51691,0.00699,5.69061E-4,1.46002,8.61956E-4  
985.55258,0.00708,6.77481E-4,1.45978,9.01944E-4  
984.58824,0.00715,7.64463E-4,1.45931,8.59921E-4  
983.6239,0.00741,7.86477E-4,1.45877,7.74737E-4  
982.65956,0.00771,7.41656E-4,1.45822,7.22493E-4  
981.69523,0.00825,7.04079E-4,1.45757,7.16162E-4  
980.73089,0.00903,6.97452E-4,1.45719,7.29235E-4  
979.76655,0.00975,7.24928E-4,1.45715,7.47839E-4  
978.80222,0.01009,7.3421E-4,1.45731,7.51257E-4  
977.83788,0.01005,7.37572E-4,1.45719,7.92077E-4  
976.87354,0.00999,7.9553E-4,1.45663,8.15693E-4  
975.9092,0.0102,8.27044E-4,1.45565,8.07526E-4  
974.94487,0.01106,8.39714E-4,1.45455,8.3151E-4  
973.98053,0.01244,8.94907E-4,1.45388,8.0318E-4  
973.01619,0.01386,9.04898E-4,1.45384,7.1795E-4  
972.05186,0.01485,8.40631E-4,1.45417,6.96709E-4  
971.08752,0.01557,8.21535E-4,1.45435,7.9237E-4  
970.12318,0.01625,8.87384E-4,1.45463,8.75387E-4  
969.15884,0.01641,9.85933E-4,1.4547,9.17677E-4  
968.19451,0.01698,0.00117,1.45399,9.26221E-4  
967.23017,0.0183,0.00129,1.45377,7.95687E-4  
966.26583,0.01928,0.00126,1.45385,6.69735E-4  
965.3015,0.02066,0.00126,1.45376,6.01391E-4  
964.33716,0.02236,0.00125,1.45454,5.28542E-4  
963.37282,0.02336,0.00114,1.4561,4.53942E-4  
962.40848,0.02319,9.74312E-4,1.45779,3.94072E-4  
961.44415,0.02193,8.71415E-4,1.45829,4.49954E-4  
960.47981,0.02145,9.65637E-4,1.45721,6.39787E-4  
959.51547,0.02236,0.00117,1.45631,6.46621E-4  
958.55114,0.02351,0.00127,1.45617,4.85951E-4  
957.5868,0.02448,0.00111,1.45631,4.52699E-4  
956.62246,0.02539,8.92506E-4,1.45644,4.68164E-4  
955.65812,0.02652,7.95474E-4,1.45666,5.00373E-4  
954.69379,0.02766,7.77649E-4,1.45739,6.47571E-4  
953.72945,0.02819,8.48723E-4,1.45832,7.68482E-4  
952.76511,0.02844,9.91304E-4,1.45881,8.28568E-4  
951.80078,0.02877,0.00117,1.45901,7.91782E-4  
950.83644,0.02935,0.00123,1.45886,7.10662E-4  
949.8721,0.03059,0.00122,1.45876,6.57169E-4  
948.90776,0.03212,0.00117,1.45926,6.1911E-4  
947.94343,0.03354,0.00104,1.46016,6.28757E-4  
946.97909,0.035,9.32659E-4,1.46146,7.04262E-4  
946.01475,0.03595,9.5243E-4,1.46357,7.42397E-4  
945.05042,0.03574,0.00101,1.46558,7.65476E-4  
944.08608,0.03507,0.00115,1.46674,7.66885E-4  
943.12174,0.03457,0.00126,1.46715,6.92666E-4  
942.1574,0.03472,0.00122,1.46717,6.78339E-4  
941.19307,0.03552,0.00117,1.46749,6.72585E-4  
940.22873,0.03641,0.00107,1.46829,6.60503E-4  
939.26439,0.03739,9.61998E-4,1.46939,6.7728E-4  
938.30005,0.03831,9.6757E-4,1.47128,7.02057E-4  
937.33572,0.03814,0.00104,1.47371,6.78026E-4  
936.37138,0.03693,0.00111,1.47543,6.42838E-4  
935.40704,0.03562,0.00122,1.47624,6.85491E-4  
934.44271,0.03461,0.00137,1.47617,6.67939E-4  
933.47837,0.03477,0.00148,1.47581,5.89586E-4  
932.51403,0.0354,0.00143,1.47628,5.60485E-4  
931.54969,0.03606,0.00128,1.477,5.14178E-4  
930.58536,0.03699,0.00115,1.4786,5.11014E-4  
929.62102,0.03679,0.00105,1.4811,4.49966E-4  
928.65668,0.03536,0.00101,1.48306,4.10947E-4  
927.69235,0.03347,0.00106,1.48413,4.81454E-4  
926.72801,0.03157,0.00113,1.48403,6.07397E-4

925.76367,0.03093,0.00126,1.48306,6.29299E-4  
924.79933,0.03137,0.00139,1.48297,5.30064E-4  
923.835,0.03147,0.00132,1.48347,5.153E-4  
922.87066,0.03173,0.00116,1.48402,5.37723E-4  
921.90632,0.03198,9.97935E-4,1.48526,4.97382E-4  
920.94199,0.03162,9.47594E-4,1.48694,4.21096E-4  
919.97765,0.03026,9.96723E-4,1.48872,4.89595E-4  
919.01331,0.0279,0.00104,1.48936,5.58439E-4  
918.04897,0.02625,0.00124,1.48865,5.86266E-4  
917.08464,0.02548,0.00148,1.48792,5.47799E-4  
916.1203,0.0252,0.00151,1.48722,5.78033E-4  
915.15596,0.02542,0.00132,1.4869,6.78683E-4  
914.19163,0.02574,0.00101,1.48703,6.64765E-4  
913.22729,0.0262,8.93217E-4,1.48763,5.09186E-4  
912.26295,0.02622,9.4657E-4,1.48917,4.32079E-4  
911.29861,0.02465,9.73932E-4,1.4907,4.79122E-4  
910.33428,0.0226,0.00108,1.49054,5.43702E-4  
909.36994,0.02173,0.00129,1.48972,5.48137E-4  
908.4056,0.02118,0.00142,1.4893,5.52007E-4  
907.44127,0.02077,0.00135,1.48851,6.62155E-4  
906.47693,0.02131,0.00116,1.48793,7.63454E-4  
905.51259,0.02189,9.14678E-4,1.4883,7.36281E-4  
904.54825,0.02222,7.92028E-4,1.48901,5.93692E-4  
903.58392,0.02218,8.14444E-4,1.49053,4.82143E-4  
902.61958,0.02052,8.47579E-4,1.49208,4.70789E-4  
901.65524,0.01812,9.30268E-4,1.49194,5.30661E-4  
900.69091,0.01672,0.00112,1.49051,5.30589E-4  
899.72657,0.01654,0.00131,1.48915,5.23853E-4  
898.76223,0.01674,0.00132,1.48832,5.84567E-4  
897.79789,0.01721,0.00116,1.48729,6.62667E-4  
896.83356,0.01923,0.00122,1.4871,7.17729E-4  
895.86922,0.02023,0.00114,1.4896,9.59143E-4  
894.90488,0.01857,8.92274E-4,1.49109,7.99724E-4  
893.94055,0.01793,0.00101,1.49126,5.69999E-4  
892.97621,0.01671,0.00115,1.49266,6.67385E-4  
892.01187,0.01404,0.00109,1.4921,7.37541E-4  
891.04753,0.01358,0.00122,1.49019,7.62139E-4  
890.0832,0.01385,0.0012,1.48965,9.66794E-4  
889.11886,0.01407,0.00109,1.48911,9.97446E-4  
888.15452,0.01462,0.00118,1.48951,9.07289E-4  
887.19019,0.01403,9.60442E-4,1.49001,9.04473E-4  
886.22585,0.0139,7.21483E-4,1.48987,6.89577E-4  
885.26151,0.01371,8.20575E-4,1.49074,6.37907E-4  
884.29717,0.01215,8.65322E-4,1.49117,7.15832E-4  
883.33284,0.01099,9.50683E-4,1.49023,6.6734E-4  
882.3685,0.01081,0.00106,1.48941,6.58475E-4  
881.40416,0.01067,0.00102,1.489,7.65272E-4  
880.43983,0.01051,8.70785E-4,1.48861,8.66699E-4  
879.47549,0.01035,7.68999E-4,1.48821,8.01328E-4  
878.51115,0.01045,7.26974E-4,1.48755,6.29937E-4  
877.54681,0.01135,7.06468E-4,1.48739,5.58496E-4  
876.58248,0.01182,8.11187E-4,1.48856,5.7635E-4  
875.61814,0.01059,8.42606E-4,1.48979,6.53283E-4  
874.6538,0.00862,8.17229E-4,1.48923,6.87841E-4  
873.68947,0.00824,9.88986E-4,1.48737,6.7041E-4  
872.72513,0.00927,0.00122,1.48651,6.70002E-4  
871.76079,0.01021,0.00127,1.48676,8.58414E-4  
870.79645,0.01054,0.00113,1.48782,0.00115  
869.83212,0.00969,8.682E-4,1.48877,0.00119  
868.86778,0.00846,7.40944E-4,1.48887,9.12519E-4  
867.90344,0.00748,6.99706E-4,1.4882,6.20614E-4  
866.93911,0.00739,6.57203E-4,1.48743,6.29443E-4  
865.97477,0.00726,7.50264E-4,1.48743,6.43445E-4  
865.01043,0.00654,8.28391E-4,1.48698,6.08025E-4  
864.04609,0.0066,8.94532E-4,1.48603,6.58832E-4

863.08176,0.0071,8.93409E-4,1.48592,8.36308E-4  
862.11742,0.00691,7.3472E-4,1.48616,0.00106  
861.15308,0.00643,6.75758E-4,1.48586,9.54448E-4  
860.18875,0.00653,7.32728E-4,1.48534,6.68287E-4  
859.22441,0.00665,7.4527E-4,1.48549,5.51446E-4  
858.26007,0.00608,6.39765E-4,1.48544,7.2903E-4  
857.29573,0.00577,5.72282E-4,1.4848,9.07977E-4  
856.3314,0.0059,7.27374E-4,1.48414,8.79868E-4  
855.36706,0.00651,9.9828E-4,1.48377,6.55518E-4  
854.40272,0.00698,0.00105,1.48426,6.7192E-4  
853.43839,0.00647,8.56472E-4,1.48481,8.24109E-4  
852.47405,0.0056,6.63067E-4,1.48449,7.90809E-4  
851.50971,0.00544,6.09776E-4,1.48341,6.20803E-4  
850.54537,0.00637,6.3588E-4,1.48287,6.05378E-4  
849.58104,0.00696,5.88997E-4,1.48359,7.53295E-4  
848.6167,0.00635,5.99077E-4,1.48421,7.83562E-4  
847.65236,0.0056,7.10427E-4,1.48387,7.94799E-4  
846.68802,0.00544,8.02023E-4,1.48332,7.74625E-4  
845.72369,0.00526,8.14807E-4,1.48299,6.56232E-4  
844.75935,0.00502,7.56071E-4,1.48216,6.80381E-4  
843.79501,0.00571,7.83832E-4,1.48102,7.26512E-4  
842.83068,0.0072,8.14023E-4,1.48083,7.05608E-4  
841.86634,0.00822,7.99755E-4,1.48173,6.70146E-4  
840.902,0.00844,7.9038E-4,1.48277,7.02846E-4  
839.93766,0.00826,8.46198E-4,1.48381,7.69722E-4  
838.97333,0.00734,9.51722E-4,1.48466,7.15113E-4  
838.00899,0.00616,0.00102,1.48458,6.7446E-4  
837.04465,0.0055,0.00109,1.484,6.46944E-4  
836.08032,0.00526,0.00113,1.48332,6.02221E-4  
835.11598,0.00545,0.00113,1.48272,6.12935E-4  
834.15164,0.00583,0.00105,1.48247,6.91055E-4  
833.1873,0.00623,9.01108E-4,1.48224,7.00078E-4  
832.22297,0.00734,9.21637E-4,1.48243,5.96838E-4  
831.25863,0.00787,9.54494E-4,1.48426,6.05747E-4  
830.29429,0.00626,7.78234E-4,1.48577,6.90258E-4  
829.32996,0.00442,7.17566E-4,1.48542,6.73914E-4  
828.36562,0.00365,8.13671E-4,1.48442,6.51527E-4  
827.40128,0.00343,8.90146E-4,1.48377,6.31689E-4  
826.43694,0.00314,8.44466E-4,1.4832,7.04504E-4  
825.47261,0.0032,7.5531E-4,1.4823,8.12719E-4  
824.50827,0.00407,7.75521E-4,1.48192,8.74112E-4  
823.54393,0.00449,8.01796E-4,1.48267,9.15301E-4  
822.5796,0.0039,6.72617E-4,1.48323,8.92878E-4  
821.61526,0.00305,4.98702E-4,1.48328,7.10352E-4  
820.65092,0.00215,4.16506E-4,1.48266,5.91603E-4  
819.68658,0.00185,4.54857E-4,1.4815,7.07645E-4  
818.72225,0.00263,7.51945E-4,1.4804,7.42241E-4  
817.75791,0.00382,0.00104,1.48096,6.01172E-4  
816.79357,0.00312,8.64266E-4,1.48188,7.39395E-4  
815.82924,0.00238,6.41746E-4,1.4812,7.81497E-4  
814.8649,0.00275,6.87111E-4,1.48071,8.15038E-4  
813.90056,0.00281,5.48595E-4,1.48107,9.15499E-4  
812.93622,0.00216,4.06792E-4,1.48094,7.62487E-4  
811.97189,0.0021,4.11212E-4,1.48049,5.91633E-4  
811.00755,0.00171,3.71163E-4,1.48042,5.83318E-4  
810.04321,0.00118,3.54825E-4,1.47956,6.49312E-4  
809.07888,0.00158,4.30995E-4,1.47841,8.17299E-4  
808.11454,0.00254,6.64491E-4,1.47833,7.27712E-4  
807.1502,0.0022,6.25308E-4,1.47845,7.40247E-4  
806.18586,0.00265,7.1786E-4,1.47732,9.80455E-4  
805.22153,0.00392,9.81073E-4,1.4776,8.67611E-4  
804.25719,0.00411,9.45909E-4,1.47822,7.23277E-4  
803.29285,0.00425,8.31745E-4,1.47864,6.29491E-4  
802.32852,0.00394,7.06089E-4,1.4794,5.91405E-4  
801.36418,0.0027,5.13748E-4,1.47926,6.51482E-4

800.39984,0.00287,6.74876E-4,1.4778,8.37074E-4  
799.4355,0.00414,0.00107,1.47829,6.52373E-4  
798.47117,0.00324,8.39862E-4,1.4793,6.45061E-4  
797.50683,0.00216,6.46112E-4,1.47829,6.77049E-4  
796.54249,0.00284,7.90429E-4,1.47707,8.62916E-4  
795.57816,0.00371,0.00102,1.47717,8.23994E-4  
794.61382,0.00403,0.00104,1.47715,7.94303E-4  
793.64948,0.00499,0.00107,1.47735,8.12904E-4  
792.68514,0.00558,0.00109,1.47877,8.01795E-4  
791.72081,0.00454,9.18403E-4,1.48047,8.90075E-4  
790.75647,0.00224,4.97398E-4,1.48053,9.31373E-4  
789.79213,0.00112,3.55329E-4,1.47863,7.51615E-4  
788.8278,0.00214,7.86967E-4,1.47741,7.6113E-4  
787.86346,0.0026,9.71059E-4,1.47801,7.13331E-4  
786.89912,0.00194,6.863E-4,1.47791,7.66064E-4  
785.93478,0.00188,6.33718E-4,1.47744,7.30008E-4  
784.97045,0.00172,5.78189E-4,1.47719,7.50205E-4  
784.00611,0.00163,4.47679E-4,1.47671,7.74937E-4  
783.04177,0.00172,4.59375E-4,1.4763,7.63456E-4  
782.07744,0.00174,4.85351E-4,1.47607,7.27213E-4  
781.1131,0.00172,5.26469E-4,1.47536,9.14022E-4  
780.14876,0.00271,7.76889E-4,1.47516,9.18421E-4  
779.18442,0.00243,5.94898E-4,1.47612,7.73156E-4  
778.22009,0.00141,3.55886E-4,1.47547,7.5299E-4  
777.25575,0.00135,4.34304E-4,1.47467,8.95116E-4  
776.29141,0.00115,4.61272E-4,1.47376,0.00101  
775.32708,0.00123,4.75193E-4,1.4725,0.00116  
774.36274,0.00233,6.24102E-4,1.47029,0.00159  
773.3984,0.00576,0.00112,1.47013,0.00159  
772.43406,0.00666,0.00127,1.47222,0.00124  
771.46973,0.00669,0.00137,1.47234,0.00124  
770.50539,0.00807,0.00177,1.47257,0.00116  
769.54105,0.00965,0.0022,1.47465,9.15803E-4  
768.57672,0.00827,0.00195,1.47761,0.00124  
767.61238,0.00599,0.00149,1.47771,0.0013  
766.64804,0.00477,0.0012,1.47725,0.00123  
765.6837,0.00421,0.00104,1.47608,0.00111  
764.71937,0.00444,9.8023E-4,1.47585,0.00113  
763.75503,0.00379,7.4023E-4,1.4754,0.00105  
762.79069,0.00392,6.83045E-4,1.47402,0.00102  
761.82635,0.00592,0.00106,1.47337,0.00101  
760.86202,0.00687,0.0011,1.47593,0.00108  
759.89768,0.00422,7.19292E-4,1.47684,9.38604E-4  
758.93334,0.00298,5.89164E-4,1.47468,0.00114  
757.96901,0.00468,0.00119,1.47293,0.00129  
757.00467,0.00629,0.00154,1.47478,9.19838E-4  
756.04033,0.00404,0.00114,1.47553,9.89887E-4  
755.07599,0.00402,0.00128,1.47349,0.00105  
754.11166,0.00535,0.00147,1.47374,0.0013  
753.14732,0.00493,0.00125,1.47489,0.00137  
752.18298,0.00302,7.63476E-4,1.47453,0.00143  
751.21865,0.00253,4.83515E-4,1.47197,0.00146  
750.25431,0.00453,8.29131E-4,1.47023,0.00166
